# Supplementary material for: An alternative method of SNP inclusion to develop a generalized polygenic risk score analysis across Alzheimer's disease cohorts
Source: Front Dement. 2023 Jul 31;2:1120206. doi: 10.3389/frdem.2023.1120206 (PMC11285631; doi:10.3389/frdem.2023.1120206)
Supplement: Supplementary file 1 [file Data_Sheet_1.xlsx]

## Sheet: 1. Coverage
A	Pvalue in IGAP_S1	Total SNPs		# Clumps at r2>0.9	# Clumps at r2>0.8	# Clumps at r2>0.7	# Clumps at r2>0.6	# Clumps at r2>0.5	# Clumps at r2>0.4	# Clumps at r2>0.3	# Clumps at r2>0.2	# Clumps at r2>0.1
Inclusion Threshold	5e-08	1090	IGAP Summary Statistics	256	200	164	138	125	104	88	70	43
		83	# of IGAP clumps tagged by BDR SNPs	69	61	55	50	52	47	47	42	35		Supplemental 1:
		-	# BDR SNPs that are IGAP Clump Index SNPs	34	27	21	14	15	15	13	12	9			Table demonstrate the increased coverage of base dataset SNPs, when any SNP present in the target dataset is used in the analyses comapred to when just the index SNP is utilised. Table A provides numbers of SNPs, where B (below) provides coverages as percentages.
	5e-07	1478	IGAP Summary Statistics	343	266	220	178	158	131	108	86	52
		95	# of IGAP clumps tagged by BDR SNPs	85	76	70	65	66	61	57	52	43
		-	# BDR SNPs that are IGAP Clump Index SNPs	39	31	24	17	17	16	14	14	10
	5e-06	2213	IGAP Summary Statistics	493	387	315	255	228	188	157	124	90
		129	# of IGAP clumps tagged by BDR SNPs	124	117	108	103	106	99	91	81	75
		-	# BDR SNPs that are IGAP Clump Index SNPs	53	43	36	27	27	26	24	23	19
	5e-05	4774	IGAP Summary Statistics	1001	776	631	518	461	386	335	278	226
		247	# of IGAP clumps tagged by BDR SNPs	257	255	245	228	233	222	209	201	193
		-	# BDR SNPs that are IGAP Clump Index SNPs	106	93	83	69	71	67	62	59	55
	0.0005	13703	IGAP Summary Statistics	3184	2523	2127	1839	1657	1485	1353	1236	1102
		775	# of IGAP clumps tagged by BDR SNPs	890	924	913	906	911	908	902	917	930
		-	# BDR SNPs that are IGAP Clump Index SNPs	430	398	380	359	354	344	331	329	318
	0.005	62,88	IGAP Summary Statistics	16820	13840	12099	10858	9923	9074	8374	7645	6885
		4209	# of IGAP clumps tagged by BDR SNPs	4991	5222	5247	5243	5287	5295	5376	5463	5660
		-	# BDR SNPs that are IGAP Clump Index SNPs	2632	2478	2385	2309	2248	2185	2136	2076	2008
	0.05	438696	IGAP Summary Statistics	123528	102772	90145	80500	72458	65186	58106	50724	42341
		24729	# of IGAP clumps tagged by BDR SNPs	30175	31588	31650	31506	31457	31462	31131	30669	30082
		-	# BDR SNPs that are IGAP Clump Index SNPs	14490	13389	12704	12130	11639	11199	10710	10170	9355
B	Pvalue in IGAP_S1	Total SNPs		# Clumps at r2>0.9	# Clumps at r2>0.8	# Clumps at r2>0.7	# Clumps at r2>0.6	# Clumps at r2>0.5	# Clumps at r2>0.4	# Clumps at r2>0.3	# Clumps at r2>0.2	# Clumps at r2>0.1
Inclusion Threshold	5e-08	1090	IGAP Summary Statistics	256	200	164	138	125	104	88	70	43
		83	% of IGAP clumps tagged by BDR SNPs	0.269531	0.305	0.335366	0.362319	0.416	0.451923	0.534091	0.6	0.813953
		-	% BDR SNPs that are IGAP Clump Index SNPs	0.132812	0.135	0.128049	0.101449	0.12	0.144231	0.147727	0.171429	0.209302
	5e-07	1478	IGAP Summary Statistics	343	266	220	178	158	131	108	86	52
		95	% of IGAP clumps tagged by BDR SNPs	0.247813	0.285714	0.318182	0.365169	0.417722	0.465649	0.527778	0.604651	0.826923
		-	% BDR SNPs that are IGAP Clump Index SNPs	0.113703	0.116541	0.109091	0.0955056	0.107595	0.122137	0.12963	0.162791	0.192308
	5e-06	2213	IGAP Summary Statistics	493	387	315	255	228	188	157	124	90
		129	% of IGAP clumps tagged by BDR SNPs	0.251521	0.302326	0.342857	0.403922	0.464912	0.526596	0.579618	0.653226	0.833333
		-	% BDR SNPs that are IGAP Clump Index SNPs	0.107505	0.111111	0.114286	0.105882	0.118421	0.138298	0.152866	0.185484	0.211111
	5e-05	4774	IGAP Summary Statistics	1001	776	631	518	461	386	335	278	226
		247	% of IGAP clumps tagged by BDR SNPs	0.256743	0.328608	0.388273	0.440154	0.505423	0.57513	0.623881	0.723022	0.853982
		-	% BDR SNPs that are IGAP Clump Index SNPs	0.105894	0.119845	0.131537	0.133205	0.154013	0.173575	0.185075	0.21223	0.243363
	0.0005	13703	IGAP Summary Statistics	3184	2523	2127	1839	1657	1485	1353	1236	1102
		775	% of IGAP clumps tagged by BDR SNPs	0.279523	0.366231	0.429243	0.492659	0.549789	0.611448	0.666667	0.741909	0.84392
		-	% BDR SNPs that are IGAP Clump Index SNPs	0.13505	0.157749	0.178655	0.195215	0.213639	0.23165	0.244642	0.266181	0.288566
	0.005	62,88	IGAP Summary Statistics	16820	13840	12099	10858	9923	9074	8374	7645	6885
		4209	% of IGAP clumps tagged by BDR SNPs	0.29673	0.377312	0.433672	0.48287	0.532803	0.583535	0.641987	0.714585	0.822077
		-	% BDR SNPs that are IGAP Clump Index SNPs	0.15648	0.179046	0.197124	0.212654	0.226544	0.240798	0.255075	0.27155	0.291649
	0.05	438696	IGAP Summary Statistics	123528	102772	90145	80500	72458	65186	58106	50724	42341
		24729	% of IGAP clumps tagged by BDR SNPs	0.244277	0.30736	0.351101	0.391379	0.434141	0.48265	0.535762	0.604625	0.71047
		-	% BDR SNPs that are IGAP Clump Index SNPs	0.117301	0.130279	0.140929	0.150683	0.160631	0.171801	0.184318	0.200497	0.220944

## Sheet: 2. Cross-Cohort modelling
										ADC7										BDR										NIA										ROSMAP
Supplemental 2:
	Scatterplots of AUC's achieved under SNP inclusion by various models from traditional threshold modelling of the base dataset P value to over-fitted models for the 42,684 SNPs that tagged common LD blocks across the 5 target cohorts			A	IGAP P value Threshold Modelling
				B	SNPs added individually based on P value in cohort association
				C	SNPs added individually based on direction of effect on AUC in P value ranked analysis
[truncated: 1 more columns]

## Sheet: 3. 2207 Model SNP Info
Supplemental 3:
		Annotated LD blocks from the 2207 lenient model with genes located in the block and SNPs in each cohort used to "tag" the block
Clump	Chr	bp range		Gene	Min Beta	Max Beta	Ave Beta	Min P value	Max P value	Ave P value		Clump	ADC7_SNP	A1	Case_AF	Control_AF	Beta	IGAP_Pvalue		Clump	BDR_SNP	A1	Case_AF	Control_AF	IGAP_Beta	IGAP_Pvalue		Clump	NIA_SNP	A1	Case_AF	Control_AF	IGAP_Beta	IGAP_Pvalue		Clump	ROSMAP_SNP	A1	Case_AF	Control_AF	IGAP_Beta	IGAP_Pvalue		Clump	TGEN_SNP	A1	Case_AF	Control_AF	IGAP_Beta
7	19	45411941	45411941	APOE	1.3503	1.3503	1.3503	6.70E-536	6.70E-536	6.70E-536		7	rs429358	C	0.383	0.1646	1.3503	6.70e-536		7	rs429358	C	0.4113	0.1677	1.3503	6.70e-536		7	rs429358	C	0.4742	0.1321	1.3503	6.70e-536		7	rs429358	C	0.1103	0.1283	1.3503	6.70e-536		7	rs429358	C	0.409	0.1184	1.3503
12	19	45403412	50093506	TOMM40	-0.4075	-0.3805	-0.4021	6.16e-125	2.04e-114	4.08e-115		12	rs1160985	T	0.3268	0.4396	-0.4075	6.16e-125		12	rs1160985	T	0.3118	0.436	-0.4075	6.16e-125		12	rs8106922	G	0.267	0.3976	-0.3805	2.04e-114		12	rs1160985	T	0.363	0.4277	-0.4075	6.16e-125		12	rs1160985	T	0.3187	0.4901	-0.4075
60	19	45412079	45412079	APOE	-0.3871	-0.3871	-0.3871	1.234e-22	1.234e-22	1.234e-22		60	rs7412	T	0.04375	0.06208	-0.3871	1.234e-22		60	rs7412	T	0.0493	0.08232	-0.3871	1.234e-22		60	rs7412	T	0.0205	0.09515	-0.3871	1.234e-22		60	rs7412	T	0.07353	0.08224	-0.3871	1.234e-22		60	rs7412	T	0.03534	0.09749	-0.3871
78	8	27464519	27520436	CLU	-0.1381	-0.1381	-0.1381	1.722e-16	1.722e-16	1.722e-16		78	rs11136000	T	0.3741	0.3808	-0.1381	1.722e-16		78	rs11136000	T	0.3652	0.3811	-0.1381	1.722e-16		78	rs11136000	T	0.3574	0.4027	-0.1381	1.722e-16		78	rs11136000	T	0.3699	0.4066	-0.1381	1.722e-16		78	rs11136000	T	0.3556	0.4059	-0.1381
102	11	85492678	85824859		-0.1173	-0.1122	-0.11504	4.683e-13	2.686e-12	1.19252e-12		102	rs1237999	G	0.317	0.347	-0.1173	4.683e-13		102	rs542126	A	0.316	0.3841	-0.1122	2.686e-12		102	rs1237999	G	0.3289	0.3467	-0.1173	4.683e-13		102	rs659023	A	0.3014	0.4281	-0.1142	1.17e-12		102	rs659023	A	0.3332	0.3819	-0.1142
114	11	59779663	60034429	MS4A4A	-0.1055	-0.1011	-0.1034	5.602e-11	3.462e-10	1.48568e-10		114	rs1530914	C	0.3955	0.3957	-0.1038	5.602e-11		114	rs4938933	C	0.3806	0.4543	-0.1028	3.462e-10		114	rs1562990	C	0.3681	0.3994	-0.1011	1.498e-10		114	rs1530914	C	0.3836	0.3683	-0.1038	5.602e-11		114	rs1026254	T	0.3642	0.4337	-0.1055
122	7	142819261	143109139	EPHA1-AS1	-0.1339	-0.1294	-0.1312	2.086e-10	3.029e-10	2.6518e-10		122	rs11762262	T	0.1812	0.1968	-0.1339	2.086e-10		122	rs11762262	T	0.2121	0.2348	-0.1339	2.086e-10		122	rs11767557	C	0.1777	0.2042	-0.1294	3.029e-10		122	rs11767557	C	0.226	0.2246	-0.1294	3.029e-10		122	rs11767557	C	0.1806	0.2176	-0.1294
124	11	59616152	59945745	MS4A6A	-0.1014	-0.0891	-0.0981	3.477e-10	1.398e-08	3.14288e-09		124	rs12453	C	0.3891	0.3921	-0.1014	5.195e-10		124	rs12453	C	0.3834	0.4482	-0.1014	5.195e-10		124	rs2847666	G	0.3708	0.4097	-0.0993	3.477e-10		124	rs2847666	G	0.3904	0.3683	-0.0993	3.477e-10		124	rs1303615	T	0.4156	0.4711	-0.0891
152	2	127589505	127878839		-0.1115	-0.1086	-0.11034	7.209e-09	3.744e-08	1.93014e-08		152	rs10929009	T	0.2036	0.235	-0.1115	7.209e-09		152	rs4663098	T	0.191	0.2073	-0.1086	3.744e-08		152	rs4663098	T	0.1988	0.243	-0.1086	3.744e-08		152	rs10929009	T	0.226	0.244	-0.1115	7.209e-09		152	rs10929009	T	0.2013	0.2509	-0.1115
174	2	127604455	127889932		0.1027	0.1277	0.12042	8.954e-09	2.516e-06	5.24847e-07		174	rs6710467	A	0.1723	0.1535	0.126	4.231e-08		174	rs28434131	G	0.2135	0.128	0.1027	2.516e-06		174	rs12989701	A	0.1756	0.1529	0.1197	1.466e-08		174	rs6710467	A	0.1781	0.2036	0.126	4.231e-08		174	rs13004848	C	0.1789	0.1511	0.1277
188	6	47445017	47693574	CD2AP-DT	0.0909	0.0978	0.09356	3.052e-08	1.071e-07	7.946e-08		188	rs1004173	T	0.2938	0.2711	0.0973	4.548e-08		188	rs10948363	G	0.3046	0.2943	0.0978	3.052e-08		188	rs10948367	G	0.2986	0.2576	0.0909	1.071e-07		188	rs10948367	G	0.2361	0.2665	0.0909	1.071e-07		188	rs10948367	G	0.2895	0.2679	0.0909
230	8	27476815	27535944		-0.0837	-0.0797	-0.0821	2.678e-07	6.968e-07	3.7848e-07		230	rs538181	G	0.4196	0.4468	-0.0837	2.678e-07		230	rs538181	G	0.4157	0.4878	-0.0837	2.678e-07		230	rs2582367	C	0.4187	0.4445	-0.0797	6.968e-07		230	rs538181	G	0.4521	0.4641	-0.0837	2.678e-07		230	rs484377	C	0.4385	0.4401	-0.0797
250	11	59595197	59852078	MS4A3	-0.0867	-0.0679	-0.08156	7.442e-07	5.105e-05	1.15524e-05		250	rs528823	T	0.2732	0.2877	-0.0853	1.494e-06		250	rs558788	G	0.2753	0.3171	-0.0867	7.442e-07		250	rs474951	G	0.2527	0.2885	-0.0826	2.98e-06		250	rs528823	T	0.2466	0.2934	-0.0853	1.494e-06		250	rs1286289	A	0.2857	0.3264	-0.0679
305	4	11324021	11674661	lncRNA	0.0699	0.0786	0.07294	3.66e-06	6.44e-05	4.0526e-05		305	rs7671189	T	0.2795	0.2888	0.0702	6.44e-05		305	rs7671189	T	0.3048	0.2652	0.0702	6.44e-05		305	rs2159283	G	0.2968	0.263	0.0786	3.66e-06		305	rs7665839	C	0.3151	0.3204	0.0699	6.241e-05		305	rs1548715	G	0.3013	0.2702	0.0758
372	14	92008168	92938415	SLC24A4	0.0772	0.0865	0.08252	7.97e-06	1.713e-05	1.2914e-05		372	rs11160071	T	0.241	0.1997	0.0865	1.117e-05		372	rs7154400	G	0.2388	0.2134	0.0772	1.713e-05		372	rs11160071	T	0.2246	0.2091	0.0865	1.117e-05		372	rs7154400	G	0.2192	0.2365	0.0772	1.713e-05		372	rs12883528	G	0.236	0.1941	0.0852
392	14	92000798	92931737	SLC24A4	0.0772	0.078	0.07736	1.3e-05	2.837e-05	2.5296e-05		392	rs11160067	C	0.2804	0.235	0.0772	2.837e-05		392	rs941648	G	0.243	0.2165	0.078	1.3e-05		392	rs11160067	C	0.25	0.2412	0.0772	2.837e-05		392	rs11160067	C	0.2817	0.2667	0.0772	2.837e-05		392	rs11160067	C	0.2815	0.222	0.0772
417	8	98331852	98401028		0.1679	0.1679	0.1679	1.42e-05	1.42e-05	1.42e-05		417	rs7825243	A	0.04286	0.03381	0.1679	1.42e-05		417	rs7825243	A	0.02949	0.02744	0.1679	1.42e-05		417	rs7825243	A	0.03922	0.03394	0.1679	1.42e-05		417	rs7825243	A	0.0411	0.03892	0.1679	1.42e-05		417	rs7825243	A	0.04522	0.02773	0.1679
582	19	18432141	18627067		0.0641	0.0714	0.06672	2.671e-05	9.2e-05	5.409e-05		582	rs10427083	A	0.3491	0.3243	0.0667	5.166e-05		582	rs2303697	C	0.3399	0.3354	0.0714	2.671e-05		582	rs4808801	G	0.3375	0.3409	0.0657	5.004e-05		582	rs4808801	G	0.363	0.3182	0.0657	5.004e-05		582	rs271626	C	0.3652	0.3276	0.0641
629	4	11363524	11760145	lncRNA	0.0661	0.0693	0.06682	5.953e-05	0.0001482	0.000130306		629	rs1388867	T	0.2812	0.2871	0.0661	0.0001482		629	rs1388867	T	0.3048	0.2683	0.0661	0.0001482		629	rs1388867	T	0.2968	0.2552	0.0661	0.0001482		629	rs6845480	T	0.3082	0.3204	0.0693	5.953e-05		629	rs12651498	C	0.307	0.2819	0.0665
696	4	110006432	110236631	COL25A1	-0.1527	-0.1184	-0.13898	3.632e-05	0.0007022	0.000302672		696	rs17039766	A	0.05	0.05765	-0.1184	0.0007022		696	rs17039766	A	0.06461	0.05488	-0.1184	0.0007022		696	rs11736110	T	0.05169	0.06553	-0.1527	3.632e-05		696	rs11736110	T	0.05479	0.04192	-0.1527	3.632e-05		696	rs11736110	T	0.04805	0.06553	-0.1527
758	7	99494863	99736059	PPP1R35 Antisense RNA 1	-0.0618	-0.0593	-0.0603	0.0003306	0.001077	0.00077844		758	rs11771139	A	0.2411	0.2622	-0.0593	0.001077		758	rs12705070	G	0.2823	0.2835	-0.0618	0.0003306		758	rs12705070	G	0.2787	0.264	-0.0618	0.0003306		758	rs11771139	A	0.3014	0.2927	-0.0593	0.001077		758	rs11771139	A	0.257	0.302	-0.0593
775	2	71369699	71654175	ZNF638	0.0705	0.0743	0.07176	6.164e-05	0.0001576	8.646e-05		775	rs1804020	A	0.2455	0.2162	0.0712	7.061e-05		775	rs1804020	A	0.2402	0.2195	0.0712	7.061e-05		775	rs6725892	C	0.2754	0.2182	0.0705	0.0001576		775	rs7581030	C	0.2877	0.2425	0.0743	6.164e-05		775	rs12986712	G	0.2453	0.2285	0.0716
834	1	205006527	206955041		0.0776	0.0932	0.0819	5.999e-05	0.0004076	0.000272204		834	rs3024505	A	0.1616	0.1535	0.0776	0.0004076		834	rs3122605	G	0.1517	0.1037	0.0932	5.999e-05		834	rs3024505	A	0.1667	0.1582	0.0776	0.0004076		834	rs3024505	A	0.1197	0.1506	0.0776	0.0004076		834	rs3024493	A	0.1568	0.1378	0.0835
903	6	106601165	106707858	ATG5	-0.0632	-0.0602	-0.0608	7.287e-05	0.0001972	0.000172334		903	rs9398069	C	0.4036	0.4245	-0.0602	0.0001972		903	rs9398069	C	0.375	0.4116	-0.0602	0.0001972		903	rs9398069	C	0.3663	0.4127	-0.0602	0.0001972		903	rs9398069	C	0.363	0.3765	-0.0602	0.0001972		903	rs9372118	C	0.397	0.4014	-0.0632
911	4	38600670	38924330	FAM114A1	-0.0717	-0.0716	-0.07166	0.000103	0.0001056	0.00010456		911	rs10000037	A	0.2509	0.2428	-0.0717	0.0001056		911	rs12509328	T	0.257	0.2683	-0.0716	0.000103		911	rs12509328	T	0.2371	0.2637	-0.0716	0.000103		911	rs10000037	A	0.2603	0.25	-0.0717	0.0001056		911	rs10000037	A	0.2403	0.2711	-0.0717
971	11	924904	955638	AP2A2	-0.0601	-0.0584	-0.05934	0.0001418	0.0005132	0.00023044		971	rs10794342	C	0.4393	0.4595	-0.0596	0.0005132		971	rs7950967	G	0.4663	0.4268	-0.0584	0.0002054		971	rs10794350	A	0.4269	0.4594	-0.0593	0.0001459		971	rs10794350	A	0.4097	0.4421	-0.0593	0.0001459		971	rs10751669	G	0.4462	0.4668	-0.0601
979	15	56760287	59086703	ADAM10	-0.0635	-0.0498	-0.0549	0.0001756	0.003435	0.00173024		979	rs11854073	A	0.3041	0.3326	-0.0557	0.0008028		979	rs383902	T	0.3539	0.3445	-0.0635	0.0001756		979	rs11854073	A	0.2819	0.323	-0.0557	0.0008028		979	rs474875	G	0.3403	0.3353	-0.0498	0.003435		979	rs474875	G	0.3293	0.3444	-0.0498
1045	16	19833464	19928738		0.065	0.0756	0.07018	0.0001012	0.0006219	0.00034022		1045	rs7190781	C	0.2518	0.2112	0.065	0.0006219		1045	rs7190781	C	0.2022	0.2195	0.065	0.0006219		1045	rs7195332	T	0.2201	0.1939	0.0756	0.0001012		1045	rs7195332	T	0.2123	0.2212	0.0756	0.0001012		1045	rs7188930	G	0.222	0.198	0.0697
1215	10	90537556	90547576		-0.0612	-0.0598	-0.06092	0.0001363	0.0002455	0.00015814		1215	rs7081173	A	0.3545	0.3675	-0.0612	0.0001363		1215	rs7081173	A	0.3596	0.3262	-0.0612	0.0001363		1215	rs7081173	A	0.3155	0.36	-0.0612	0.0001363		1215	rs7081173	A	0.3014	0.3653	-0.0612	0.0001363		1215	rs10788613	T	0.3363	0.3687	-0.0598
1227	11	131240496	131735286	NTM	-0.0669	-0.0669	-0.0669	0.0001385	0.0001385	0.0001385		1227	rs544473	T	0.367	0.4019	-0.0669	0.0001385		1227	rs544473	T	0.4017	0.4726	-0.0669	0.0001385		1227	rs544473	T	0.3821	0.4006	-0.0669	0.0001385		1227	rs544473	T	0.411	0.4042	-0.0669	0.0001385		1227	rs544473	T	0.3789	0.3957	-0.0669
1247	10	11726639	11769108		-0.0651	-0.062	-0.06278	0.000865	0.001722	0.001535		1247	rs1466696	T	0.2089	0.2106	-0.062	0.001696		1247	rs1466696	T	0.2135	0.247	-0.062	0.001696		1247	rs10905992	T	0.2204	0.2536	-0.0651	0.000865		1247	rs1466696	T	0.1739	0.2209	-0.062	0.001696		1247	rs11257246	A	0.2027	0.2244	-0.0628
1316	5	107191287	107223723	FBXL17	0.0714	0.0744	0.0736	0.0002157	0.0003674	0.0002579		1316	rs12189428	G	0.2071	0.1885	0.0744	0.0002157		1316	rs17160677	T	0.1756	0.1921	0.0714	0.0003674		1316	rs12522548	C	0.2112	0.1703	0.0734	0.000275		1316	rs12189428	G	0.1389	0.1737	0.0744	0.0002157		1316	rs12189428	G	0.1862	0.178	0.0744
1521	3	150967269	152467117	MED12L	0.0411	0.0576	0.05424	0.0006455	0.01643	0.00389744		1521	rs10935835	G	0.3196	0.2941	0.0576	0.0006455		1521	rs1882013	C	0.3006	0.3079	0.0411	0.01643		1521	rs10513391	G	0.3307	0.2903	0.0575	0.0008039		1521	rs10513391	G	0.3082	0.3144	0.0575	0.0008039		1521	rs10513391	G	0.3054	0.2828	0.0575
1643	17	12704197	12763748	ARHGAP44	-0.0618	-0.0429	-0.0483	0.0002421	0.01023	0.00640842		1643	rs7218185	G	0.342	0.3592	-0.0429	0.01023		1643	rs8082029	A	0.389	0.3994	-0.0487	0.003239		1643	rs2097985	T	0.2923	0.3382	-0.0452	0.008101		1643	rs7218185	G	0.3356	0.3114	-0.0429	0.01023		1643	rs1971662	C	0.3607	0.3748	-0.0618
1687	11	85553870	85876222		-0.0583	-0.0583	-0.0583	0.0002509	0.0002509	0.0002509		1687	rs11234568	G	0.3634	0.3991	-0.0583	0.0002509		1687	rs11234568	G	0.3806	0.4451	-0.0583	0.0002509		1687	rs11234568	G	0.3761	0.3927	-0.0583	0.0002509		1687	rs11234568	G	0.2945	0.4277	-0.0583	0.0002509		1687	rs11234568	G	0.3699	0.4103	-0.0583
1832	12	111406912	112922529	HECTD4	0.0149	0.0223	0.01786	0.2879	0.4647	0.39398		1832	rs7974383	G	0.1807	0.1654	0.0223	0.2879		1832	rs7974383	G	0.1826	0.1402	0.0223	0.2879		1832	rs11066322	A	0.1649	0.18	0.0149	0.4647		1832	rs11066322	A	0.2465	0.138	0.0149	0.4647		1832	rs11066322	A	0.1638	0.1721	0.0149
2029	20	47879698	48554670	SLC9A8,ENSG00000237788	0.0516	0.0601	0.05496	0.0003736	0.002885	0.00190328		2029	rs17724104	G	0.3089	0.2866	0.0516	0.002885		2029	rs2038127	G	0.3244	0.2957	0.0601	0.0003736		2029	rs17724104	G	0.2599	0.2898	0.0516	0.002885		2029	rs17724104	G	0.2945	0.2635	0.0516	0.002885		2029	rs11906300	C	0.2958	0.3054	0.0599
2052	22	40722757	42398195	SEPTIN3	-0.0589	-0.055	-0.05632	0.0004217	0.001053	0.0008262		2052	rs1062753	A	0.2982	0.3204	-0.055	0.001053		2052	rs1062753	A	0.2963	0.2805	-0.055	0.001053		2052	rs1062753	A	0.2977	0.3067	-0.055	0.001053		2052	rs739296	A	0.2671	0.2994	-0.0589	0.0004217		2052	rs11090066	C	0.2967	0.3269	-0.0577
2231	16	19651150	19784691	VPS35L,KNOP1	-0.0759	-0.0647	-0.07084	0.0004154	0.002339	0.00124868		2231	rs1544352	G	0.1798	0.1981	-0.0717	0.001202		2231	rs720176	G	0.1798	0.1646	-0.0647	0.002339		2231	rs1858973	C	0.1729	0.1667	-0.0759	0.0004154		2231	rs1544352	G	0.2055	0.1946	-0.0717	0.001202		2231	rs1021865	G	0.1642	0.185	-0.0702
2254	8	101850212	101924245		-0.1125	-0.1025	-0.1073	0.0004228	0.0008942	0.00065816		2254	rs3133539	A	0.05625	0.07539	-0.1025	0.0008942		2254	rs3133540	C	0.0618	0.1067	-0.1125	0.0004228		2254	rs3108913	G	0.06696	0.07939	-0.1074	0.0006109		2254	rs3133539	A	0.08219	0.06287	-0.1025	0.0008942		2254	rs3105459	T	0.06849	0.07156	-0.1116
2435	11	85490056	85858417		0.0394	0.0604	0.05494	0.0004777	0.01722	0.00405522		2435	rs12786057	A	0.3705	0.308	0.0604	0.0004777		2435	rs7926591	G	0.3704	0.311	0.0541	0.001623		2435	rs495942	A	0.287	0.3073	0.0394	0.01722		2435	rs12786057	A	0.3493	0.2844	0.0604	0.0004777		2435	rs12786057	A	0.3296	0.3023	0.0604
2695	2	1854799	1877998	MYT1L	0.0535	0.0628	0.05722	0.001095	0.006299	0.0042174		2695	rs4305302	G	0.2075	0.1896	0.0628	0.001095		2695	rs4305302	G	0.2317	0.1829	0.0628	0.001095		2695	rs4853754	C	0.2062	0.2121	0.0535	0.006299		2695	rs4853754	C	0.2466	0.1788	0.0535	0.006299		2695	rs4853754	C	0.2041	0.1877	0.0535
2853	6	106982560	107099708	CRYBG1	0.0641	0.0754	0.07232	0.0006	0.004533	0.00154678		2853	rs1111830	G	0.1411	0.122	0.0641	0.004533		2853	rs1770720	G	0.1699	0.128	0.0728	0.0008969		2853	rs1770718	T	0.1464	0.1218	0.0739	0.001104		2853	rs1770721	A	0.1164	0.1557	0.0754	0.0006		2853	rs1770721	A	0.1418	0.1204	0.0754
2976	16	74722377	76200446	ENSG00000260223	-0.0581	-0.0522	-0.05476	0.003852	0.01263	0.0074504		2976	rs2288061	A	0.1616	0.187	-0.054	0.007496		2976	rs2288061	A	0.1404	0.1463	-0.054	0.007496		2976	rs12597900	G	0.1458	0.1703	-0.0581	0.003852		2976	rs1345851	A	0.1357	0.1515	-0.0555	0.005778		2976	rs10871321	A	0.1675	0.17	-0.0522
3183	11	61448706	61692130		-0.0419	-0.0419	-0.0419	0.01062	0.01062	0.01062		3183	rs882169	T	0.3982	0.419	-0.0419	0.01062		3183	rs882169	T	0.389	0.4509	-0.0419	0.01062		3183	rs882169	T	0.4116	0.4176	-0.0419	0.01062		3183	rs882169	T	0.3493	0.4371	-0.0419	0.01062		3183	rs882169	T	0.3911	0.4177	-0.0419
3214	4	39494511	39984938		0.0487	0.0692	0.0569	0.0007163	0.03087	0.0188085		3214	rs1003212	T	0.1429	0.1286	0.0487	0.03087		3214	rs1003212	T	0.141	0.1474	0.0487	0.03087		3214	rs1003212	T	0.1524	0.147	0.0487	0.03087		3214	rs2732072	C	0.1571	0.1719	0.0692	0.0007163		3214	rs2732072	C	0.1788	0.1534	0.0692
3377	12	51860170	53585859		0.0582	0.0955	0.08218	0.002873	0.106	0.027032		3377	rs11170429	A	0.06786	0.06264	0.0582	0.106		3377	rs12161793	G	0.05618	0.03049	0.0955	0.002873		3377	rs2293429	C	0.07843	0.05212	0.0918	0.003987		3377	rs11170466	T	0.05479	0.05488	0.0827	0.01115		3377	rs11170466	T	0.05474	0.06272	0.0827
3421	7	87968107	88168700	ENSG00000233420	0.0147	0.0198	0.01634	0.2355	0.3811	0.3304		3421	rs13225805	G	0.3387	0.3098	0.0147	0.3811		3421	rs13225805	G	0.3592	0.323	0.0147	0.3811		3421	rs13225805	G	0.3396	0.3089	0.0147	0.3811		3421	rs2213991	A	0.2958	0.3788	0.0198	0.2355		3421	rs1024386	A	0.3411	0.3025	0.0178
3432	8	3466827	3483933	CSMD1	0.1246	0.1362	0.13156	0.000791	0.001718	0.0011618		3432	rs11781825	T	0.05268	0.04435	0.1246	0.001718		3432	rs11781825	T	0.03652	0.05183	0.1246	0.001718		3432	rs11786532	C	0.05	0.03949	0.1362	0.000791		3432	rs11786532	C	0.0411	0.06325	0.1362	0.000791		3432	rs11786532	C	0.051	0.03943	0.1362
3450	14	88578272	89512587		0.0535	0.068	0.06308	0.000796	0.006441	0.00243688		3450	rs10134660	C	0.2205	0.1973	0.0671	0.0008437		3450	rs7149319	C	0.2149	0.1921	0.0597	0.00326		3450	rs10134660	C	0.208	0.1933	0.0671	0.0008437		3450	rs17125186	G	0.2534	0.2066	0.068	0.000796		3450	rs12588685	T	0.2287	0.1852	0.0535
3580	18	26544321	28333975		0.0762	0.1004	0.08104	0.0008415	0.009391	0.0076811		3580	rs10502547	T	0.08661	0.06929	0.0762	0.009391		3580	rs74354143	T	0.08069	0.07099	0.1004	0.0008415		3580	rs10502547	T	0.08824	0.07091	0.0762	0.009391		3580	rs10502547	T	0.1233	0.08084	0.0762	0.009391		3580	rs10502547	T	0.08465	0.08229	0.0762
3722	6	149495480	149537173		0.0673	0.0806	0.06996	0.0008921	0.004044	0.00341362		3722	rs12200379	A	0.1268	0.1125	0.0673	0.004044		3722	rs80066353	C	0.1081	0.1189	0.0806	0.0008921		3722	rs12200379	A	0.1205	0.1145	0.0673	0.004044		3722	rs12200379	A	0.1301	0.1257	0.0673	0.004044		3722	rs12200379	A	0.1284	0.1048	0.0673
3928	5	170982135	171049530		-0.0513	-0.0513	-0.0513	0.0009571	0.0009571	0.0009571		3928	rs10039848	A	0.483	0.4861	-0.0513	0.0009571		3928	rs10039848	A	0.4705	0.497	-0.0513	0.0009571		3928	rs10039848	A	0.4528	0.4964	-0.0513	0.0009571		3928	rs10039848	A	0.3973	0.485	-0.0513	0.0009571		3928	rs10039848	A	0.4564	0.4973	-0.0513
3932	5	139731232	139805611	ANKHD1,ANKHD1-EIF4EBP3	-0.0489	-0.046	-0.04774	0.001532	0.003957	0.002502		3932	rs10042299	G	0.4577	0.4686	-0.0489	0.001532		3932	rs10042299	G	0.4537	0.4695	-0.0489	0.001532		3932	rs10042299	G	0.4305	0.4782	-0.0489	0.001532		3932	rs6879217	C	0.4658	0.4222	-0.046	0.003957		3932	rs6879217	C	0.4356	0.469	-0.046
3982	22	39806283	41415644		0.0297	0.0364	0.03104	0.02697	0.06926	0.060802		3982	rs4821981	T	0.4259	0.4002	0.0297	0.06926		3982	rs4821981	T	0.3806	0.3902	0.0297	0.06926		3982	rs7290458	C	0.4002	0.3636	0.0364	0.02697		3982	rs4821981	T	0.3643	0.3608	0.0297	0.06926		3982	rs4821981	T	0.4055	0.3607	0.0297
4192	2	86961722	87108211	ANAPC1P1	-0.0577	-0.0577	-0.0577	0.006012	0.006012	0.006012		4192	rs6709175	C	0.1574	0.1829	-0.0577	0.006012		4192	rs6709175	C	0.1775	0.2012	-0.0577	0.006012		4192	rs6709175	C	0.1613	0.1948	-0.0577	0.006012		4192	rs6709175	C	0.1507	0.1747	-0.0577	0.006012		4192	rs6709175	C	0.1893	0.1823	-0.0577
4335	5	54301408	54337165	ESM1	-0.0552	-0.0364	-0.04768	0.001088	0.03317	0.0139208		4335	rs4865907	C	0.3122	0.3343	-0.0364	0.03317		4335	rs4865907	C	0.3174	0.3506	-0.0364	0.03317		4335	rs1396499	T	0.3062	0.34	-0.0552	0.001088		4335	rs1396499	T	0.3151	0.3614	-0.0552	0.001088		4335	rs1396499	T	0.3293	0.3255	-0.0552
4477	11	75048168	75375301	MAP6	0.1056	0.1272	0.11498	0.001783	0.005628	0.002826		4477	rs12574551	C	0.04554	0.0388	0.1113	0.003059		4477	rs17134189	C	0.05056	0.03354	0.1272	0.001783		4477	rs12282340	G	0.041	0.04485	0.1154	0.00183		4477	rs12282340	G	0.0411	0.03892	0.1154	0.00183		4477	rs10160335	T	0.04656	0.02828	0.1056
4581	7	105062048	105274812	ATXN7L1	0.0509	0.0517	0.05122	0.001175	0.001201	0.0011906		4581	rs1615197	C	0.4223	0.3877	0.0517	0.001175		4581	rs1615197	C	0.4017	0.3994	0.0517	0.001175		4581	rs1706916	G	0.4225	0.4363	0.0509	0.001201		4581	rs1706916	G	0.4384	0.4461	0.0509	0.001201		4581	rs1706916	G	0.4535	0.3989	0.0509
4898	4	110155157	110374606	COL25A1	0.0555	0.0555	0.0555	0.01883	0.01883	0.01883		4898	rs12640304	T	0.1232	0.1292	0.0555	0.01883		4898	rs12640304	T	0.1503	0.1067	0.0555	0.01883		4898	rs12640304	T	0.1408	0.1268	0.0555	0.01883		4898	rs12640304	T	0.1575	0.1257	0.0555	0.01883		4898	rs12640304	T	0.1462	0.1105	0.0555
5141	3	34994954	35019950		0.0469	0.0493	0.04786	0.001964	0.004259	0.003341		5141	rs9881697	G	0.425	0.3869	0.0493	0.001964		5141	rs9881697	G	0.3694	0.3628	0.0493	0.001964		5141	rs13071005	G	0.4082	0.3689	0.0469	0.004259		5141	rs13071005	G	0.4315	0.3922	0.0469	0.004259		5141	rs13071005	G	0.3703	0.3927	0.0469
5169	4	114254569	114474018	ANK2	-0.0448	-0.029	-0.03532	0.1461	0.2845	0.22914		5169	rs2272230	T	0.08929	0.1048	-0.0448	0.1461		5169	rs2272230	T	0.07584	0.1311	-0.0448	0.1461		5169	rs17045935	C	0.09537	0.09345	-0.029	0.2845		5169	rs17045935	C	0.1233	0.08383	-0.029	0.2845		5169	rs17045935	C	0.1063	0.09066	-0.029
5368	20	44419171	45035849	ELMO2	0.0728	0.0883	0.08372	0.003141	0.02211	0.007992		5368	rs11699006	C	0.06964	0.06042	0.0728	0.02211		5368	rs2297056	G	0.06039	0.1128	0.0859	0.003906		5368	rs10211808	T	0.08021	0.06121	0.0833	0.007662		5368	rs2260959	G	0.09589	0.04491	0.0883	0.003141		5368	rs2260959	G	0.07203	0.08318	0.0883
5475	9	97247123	98204792		0.0845	0.0994	0.09316	0.001511	0.01026	0.0042942		5475	rs16909859	A	0.07589	0.06763	0.0925	0.003706		5475	rs76014677	T	0.09551	0.07927	0.0994	0.001511		5475	rs16909865	G	0.08021	0.05818	0.0969	0.002288		5475	rs16909859	A	0.08904	0.08383	0.0925	0.003706		5475	rs16909856	A	0.08097	0.06798	0.0845
5613	4	89066075	89286550	ABCG2	-0.0631	-0.0611	-0.0619	0.001565	0.002262	0.0019832		5613	rs6532049	T	0.1982	0.2123	-0.0631	0.001565		5613	rs6857600	T	0.184	0.189	-0.0611	0.002262		5613	rs6532049	T	0.2023	0.1972	-0.0631	0.001565		5613	rs6857600	T	0.1781	0.2096	-0.0611	0.002262		5613	rs6857600	T	0.1904	0.2189	-0.0611
5640	16	73810027	75255129	CTRB1	-0.0504	-0.0431	-0.04456	0.001574	0.006835	0.0057828		5640	rs11864719	T	0.4705	0.4956	-0.0431	0.006835		5640	rs11864719	T	0.4874	0.4787	-0.0431	0.006835		5640	rs4243110	T	0.4875	0.4703	-0.0504	0.001574		5640	rs11864719	T	0.4932	0.494	-0.0431	0.006835		5640	rs11864719	T	0.4847	0.4982	-0.0431
5809	11	18300640	18335684	HPS5	-0.0488	-0.0283	-0.03918	0.002339	0.08025	0.0260578		5809	rs2403254	C	0.4696	0.4906	-0.0396	0.0159		5809	rs2403254	C	0.389	0.4573	-0.0396	0.0159		5809	rs3802967	T	0.4397	0.4567	-0.0283	0.08025		5809	rs2403254	C	0.4315	0.4491	-0.0396	0.0159		5809	rs10832918	G	0.4096	0.3844	-0.0488
5916	16	4872930	4949815	PPL	-0.0521	-0.0421	-0.04642	0.001674	0.007071	0.0047866		5916	rs1049205	C	0.4473	0.4734	-0.049	0.002817		5916	rs2075637	T	0.4551	0.4329	-0.0451	0.00593		5916	rs1049212	A	0.4109	0.443	-0.0421	0.007071		5916	rs12446456	T	0.4726	0.4096	-0.0438	0.006441		5916	rs11076856	T	0.4264	0.4657	-0.0521
6141	3	8809723	8834723	RAD18,CAV3	0.0389	0.0457	0.04162	0.004781	0.01349	0.0100064		6141	rs237852	C	0.483	0.4534	0.0457	0.004781		6141	rs237852	C	0.493	0.4756	0.0457	0.004781		6141	rs237851	A	0.4661	0.4441	0.0389	0.01349		6141	rs237851	A	0.4384	0.5	0.0389	0.01349		6141	rs237851	A	0.468	0.4402	0.0389
6271	10	98060917	98069164	ENSG00000229418	-0.0699	-0.058	-0.06436	0.006061	0.02717	0.0152864		6271	rs12761715	C	0.1062	0.1031	-0.0616	0.01975		6271	rs7073871	G	0.1039	0.1402	-0.0688	0.006681		6271	rs11188704	G	0.1123	0.1158	-0.058	0.02717		6271	rs12774154	A	0.08904	0.08982	-0.0699	0.006061		6271	rs10509708	G	0.1094	0.1333	-0.0635
6300	10	3545431	3584829		0.0563	0.0636	0.0589	0.00235	0.009767	0.0058962		6300	rs10751929	T	0.1812	0.1598	0.0591	0.004855		6300	rs684240	A	0.1699	0.1524	0.0563	0.007654		6300	rs1890583	T	0.2036	0.143	0.0564	0.009767		6300	rs10751929	T	0.1233	0.1946	0.0591	0.004855		6300	rs24401	G	0.1688	0.1556	0.0636
6379	2	13753620	13836169		-0.0598	-0.057	-0.05756	0.004452	0.01292	0.0089324		6379	rs2089784	A	0.1866	0.202	-0.057	0.007185		6379	rs2089784	A	0.1671	0.1616	-0.057	0.007185		6379	rs2048401	C	0.1488	0.1321	-0.057	0.01292		6379	rs2048401	C	0.06164	0.1707	-0.057	0.01292		6379	rs13399724	A	0.1843	0.1759	-0.0598
6461	15	62223508	64508763	SNX1	0.0455	0.05	0.04786	0.003543	0.009928	0.0064328		6461	rs12591947	C	0.3482	0.3076	0.05	0.003543		6461	rs6494466	A	0.2654	0.2348	0.0455	0.009928		6461	rs12591947	C	0.3226	0.2824	0.05	0.003543		6461	rs6494466	A	0.3151	0.3204	0.0455	0.009928		6461	rs11635627	G	0.2864	0.2912	0.0483
6525	4	11216013	11619288		0.0319	0.0488	0.04054	0.001899	0.05081	0.0229118		6525	rs10939361	C	0.3429	0.3675	0.0319	0.05081		6525	rs6842740	T	0.4242	0.3689	0.0488	0.001899		6525	rs10939361	C	0.3717	0.3744	0.0319	0.05081		6525	rs6842740	T	0.4315	0.4341	0.0488	0.001899		6525	rs2108955	T	0.3826	0.3521	0.0413
7100	16	74793211	76236112		-0.0593	-0.0502	-0.05398	0.004069	0.02146	0.0131336		7100	rs12597800	G	0.1527	0.1739	-0.0502	0.02146		7100	rs3851752	T	0.1433	0.1677	-0.0593	0.004069		7100	rs3851752	T	0.1506	0.1764	-0.0593	0.004069		7100	rs12597800	G	0.1301	0.1467	-0.0502	0.02146		7100	rs11149879	G	0.1544	0.1604	-0.0509
7290	4	147198667	147497506	SLC10A7	-0.0458	-0.0397	-0.04134	0.004159	0.01092	0.0084206		7290	rs10212747	A	0.4402	0.4578	-0.0404	0.009008		7290	rs1960018	T	0.4452	0.4634	-0.0397	0.01092		7290	rs2062436	T	0.4412	0.4818	-0.0458	0.004159		7290	rs10212747	A	0.4589	0.494	-0.0404	0.009008		7290	rs10212747	A	0.4432	0.4633	-0.0404
7320	12	42611328	44299067	TMEM117	0.0526	0.059	0.05408	0.007725	0.01569	0.013087		7320	rs1675771	A	0.1643	0.1524	0.0526	0.01441		7320	rs1731454	T	0.1728	0.1677	0.059	0.007725		7320	rs10785481	G	0.1774	0.1885	0.0531	0.01333		7320	rs1731448	G	0.1301	0.1766	0.0531	0.01428		7320	rs10785462	A	0.1703	0.1386	0.0526
7516	18	24417919	26189067		-0.103	-0.0979	-0.0995	0.002761	0.005834	0.0047382		7516	rs10163718	A	0.05635	0.05488	-0.1008	0.003428		7516	rs8095062	A	0.04916	0.03963	-0.103	0.002761		7516	rs11873775	T	0.03922	0.05636	-0.0979	0.005834		7516	rs11873775	T	0.05479	0.0479	-0.0979	0.005834		7516	rs11873775	T	0.04574	0.06577	-0.0979
7606	8	129736712	129858316	CCDC26	-0.0392	-0.0289	-0.0341	0.01648	0.07181	0.045988		7606	rs4733649	C	0.3402	0.3276	-0.0331	0.06446		7606	rs9297775	A	0.3315	0.4055	-0.0301	0.06071		7606	rs4545057	C	0.3351	0.3442	-0.0392	0.01648		7606	rs4545057	C	0.3219	0.4212	-0.0392	0.01648		7606	rs11774758	A	0.3433	0.3773	-0.0289
8037	6	72809986	72902788	RIMS1	-0.0478	-0.0275	-0.03344	0.002504	0.08747	0.0552328		8037	rs1852705	T	0.3634	0.4013	-0.0292	0.07342		8037	rs9293862	G	0.3848	0.375	-0.0335	0.03935		8037	rs1528506	A	0.3818	0.3905	-0.0478	0.002504		8037	rs1852705	T	0.3288	0.3743	-0.0292	0.07342		8037	rs1830335	A	0.3762	0.4084	-0.0275
8066	7	141791880	142267510		0.0547	0.0735	0.0618	0.003954	0.03985	0.0260534		8066	rs4726526	G	0.1223	0.1064	0.0735	0.003954		8066	rs2213187	A	0.08708	0.08232	0.0547	0.03985		8066	rs1008660	T	0.1266	0.1006	0.0714	0.006763		8066	rs2213187	A	0.1233	0.08537	0.0547	0.03985		8066	rs2213187	A	0.09605	0.1051	0.0547
8242	8	103953319	104022495	MAILR	0.0519	0.0519	0.0519	0.01232	0.01232	0.01232		8242	rs1533182	G	0.1875	0.1596	0.0519	0.01232		8242	rs1533182	G	0.1868	0.1921	0.0519	0.01232		8242	rs1533182	G	0.1774	0.1624	0.0519	0.01232		8242	rs1533182	G	0.1849	0.1916	0.0519	0.01232		8242	rs1533182	G	0.1796	0.1591	0.0519
8275	21	27046037	28127764		-0.0504	-0.0481	-0.04992	0.004423	0.005888	0.0049374		8275	rs2830467	A	0.2536	0.2711	-0.0503	0.004423		8275	rs7279085	T	0.2289	0.2866	-0.0481	0.005888		8275	rs2830457	G	0.2504	0.2727	-0.0504	0.004792		8275	rs2830457	G	0.2397	0.2425	-0.0504	0.004792		8275	rs2830457	G	0.2647	0.271	-0.0504
8290	15	48545222	50783777	USP8	-0.0461	-0.0332	-0.0375	0.003806	0.04067	0.0230712		8290	rs3098169	A	0.4491	0.4767	-0.0461	0.003806		8290	rs3098177	A	0.3764	0.4695	-0.0368	0.02019		8290	rs3131567	T	0.4213	0.4206	-0.0332	0.04067		8290	rs3098177	A	0.4028	0.3735	-0.0368	0.02019		8290	rs3098171	G	0.4116	0.4229	-0.0346
8344	16	6391866	6456665	RBFOX1	-0.0473	-0.042	-0.04428	0.002635	0.007107	0.0050734		8344	rs2795534	A	0.4016	0.4424	-0.0424	0.006495		8344	rs2795534	A	0.4017	0.4787	-0.0424	0.006495		8344	rs2019249	A	0.4036	0.4176	-0.0473	0.002635		8344	rs2019249	A	0.411	0.3952	-0.0473	0.002635		8344	rs1004507	T	0.4337	0.4194	-0.042
8571	9	16709445	16719445	BNC2	0.0638	0.0638	0.0638	0.002732	0.002732	0.002732		8571	rs10962549	T	0.1955	0.167	0.0638	0.002732		8571	rs10962549	T	0.1713	0.122	0.0638	0.002732		8571	rs10962549	T	0.1756	0.1824	0.0638	0.002732		8571	rs10962549	T	0.1644	0.1826	0.0638	0.002732		8571	rs10962549	T	0.1559	0.1893	0.0638
8674	7	133772980	134122440		0.0501	0.0503	0.05014	0.002779	0.003719	0.003531		8674	rs13225343	G	0.3086	0.2816	0.0501	0.003719		8674	rs13225343	G	0.309	0.2835	0.0501	0.003719		8674	rs13225343	G	0.3137	0.2509	0.0501	0.003719		8674	rs13225343	G	0.2534	0.3054	0.0501	0.003719		8674	rs10263438	T	0.3407	0.3292	0.0503
9010	8	117928825	117997280		-0.0544	-0.0312	-0.03708	0.002914	0.1039	0.0695188		9010	rs16889265	C	0.2286	0.2106	-0.0343	0.06844		9010	rs16889265	C	0.2051	0.2896	-0.0343	0.06844		9010	rs1584217	A	0.2023	0.2485	-0.0544	0.002914		9010	rs3020167	T	0.1986	0.1958	-0.0312	0.1039		9010	rs3020167	T	0.2141	0.2401	-0.0312
9073	15	62205708	64421598	DAPK2	0.048	0.0535	0.0494	0.009407	0.01401	0.0104962		9073	rs191368	T	0.2732	0.2275	0.0535	0.01401		9073	rs3816385	G	0.2261	0.1951	0.0485	0.009407		9073	rs3816385	G	0.2442	0.2036	0.0485	0.009407		9073	rs3816385	G	0.1986	0.2349	0.0485	0.009407		9073	rs10162981	G	0.2171	0.2057	0.048
9211	11	49184196	49313235		0.0423	0.0613	0.05252	0.002997	0.02541	0.0108382		9211	rs679470	T	0.2321	0.2089	0.0613	0.002997		9211	rs679470	T	0.2465	0.2073	0.0613	0.002997		9211	rs202676	G	0.2437	0.2038	0.0423	0.02541		9211	rs7925896	C	0.2397	0.2275	0.0459	0.01444		9211	rs10769572	A	0.2463	0.228	0.0518
9609	15	53140804	55353512	ENSG00000260937	0.0392	0.0537	0.0508	0.00392	0.0224	0.007616		9609	rs12910429	C	0.2812	0.2616	0.0537	0.00392		9609	rs1528462	C	0.3385	0.2988	0.0392	0.0224		9609	rs12910429	C	0.2567	0.2764	0.0537	0.00392		9609	rs12910429	C	0.3151	0.2515	0.0537	0.00392		9609	rs12910429	C	0.2808	0.2554	0.0537
9780	1	40880681	41127976	RIMS3,ENSG00000287743	0.0647	0.0734	0.07054	0.003234	0.007273	0.0046514		9780	rs627178	T	0.1321	0.1197	0.0734	0.003234		9780	rs627178	T	0.1138	0.1189	0.0734	0.003234		9780	rs664350	C	0.1364	0.129	0.0678	0.006282		9780	rs627178	T	0.1507	0.0988	0.0734	0.003234		9780	rs1333827	A	0.1491	0.1093	0.0647
9795	3	117329656	118821017		-0.0463	-0.0363	-0.04288	0.00324	0.02288	0.00875		9795	rs11721241	A	0.4152	0.4468	-0.0463	0.00324		9795	rs11721241	A	0.4508	0.4207	-0.0463	0.00324		9795	rs13059762	G	0.4955	0.4927	-0.0363	0.02288		9795	rs11721241	A	0.4658	0.4281	-0.0463	0.00324		9795	rs12485703	T	0.4395	0.471	-0.0392
9942	3	179022528	180505222		0.0476	0.0512	0.05048	0.0033	0.006702	0.0039804		9942	rs16848314	C	0.3375	0.3163	0.0512	0.0033		9942	rs7610174	T	0.2795	0.3323	0.0476	0.006702		9942	rs16848314	C	0.3378	0.2943	0.0512	0.0033		9942	rs16848314	C	0.2708	0.3772	0.0512	0.0033		9942	rs16848314	C	0.3276	0.3327	0.0512
9967	9	111283142	112243321	PTPN3	-0.049	-0.049	-0.049	0.007461	0.007461	0.007461		9967	rs10512395	C	0.2205	0.2428	-0.049	0.007461		9967	rs10512395	C	0.2542	0.2439	-0.049	0.007461		9967	rs10512395	C	0.2157	0.2424	-0.049	0.007461		9967	rs10512395	C	0.1944	0.2754	-0.049	0.007461		9967	rs10512395	C	0.2722	0.2554	-0.049
10075	10	11215442	11264671	CELF2	0.0872	0.0874	0.08736	0.003349	0.004033	0.0034858		10075	rs596406	C	0.05893	0.08093	0.0874	0.003349		10075	rs596406	C	0.08848	0.07622	0.0874	0.003349		10075	rs596406	C	0.09715	0.07212	0.0874	0.003349		10075	rs596406	C	0.1164	0.06325	0.0874	0.003349		10075	rs17149684	G	0.07911	0.06351	0.0872
10590	9	81120294	81930474		0.0488	0.0552	0.05136	0.003577	0.007333	0.0058306		10590	rs7026633	C	0.2522	0.2358	0.0552	0.003577		10590	rs7026633	C	0.2317	0.2652	0.0552	0.003577		10590	rs10780301	G	0.2415	0.2282	0.0488	0.007333		10590	rs10780301	G	0.2671	0.2186	0.0488	0.007333		10590	rs10780301	G	0.2479	0.2074	0.0488
10664	11	127530476	128025266	LINC02725	-0.0463	-0.0463	-0.0463	0.003609	0.003609	0.003609		10664	rs1940359	C	0.4857	0.4856	-0.0463	0.003609		10664	rs1940359	C	0.4508	0.4939	-0.0463	0.003609		10664	rs1940359	C	0.4955	0.4945	-0.0463	0.003609		10664	rs1940359	C	0.4041	0.4611	-0.0463	0.003609		10664	rs1940359	C	0.4691	0.48	-0.0463
11049	12	27601182	27715972	PPFIBP1,ENSG00000248100	-0.0789	-0.0566	-0.06952	0.003772	0.05903	0.0171942		11049	rs753891	C	0.07589	0.0959	-0.0566	0.05903		11049	rs60399623	A	0.1081	0.1043	-0.0789	0.003772		11049	rs10506022	C	0.09715	0.08424	-0.0707	0.007723		11049	rs10506022	C	0.1164	0.1078	-0.0707	0.007723		11049	rs10506022	C	0.07761	0.1029	-0.0707
11263	2	75910783	76068710	ENSG00000287474	-0.0456	-0.0384	-0.0421	0.007594	0.02844	0.0160328		11263	rs12616488	G	0.3027	0.3004	-0.0431	0.01097		11263	rs7573336	A	0.3483	0.3129	-0.0403	0.02219		11263	rs12616488	G	0.2745	0.3212	-0.0431	0.01097		11263	rs6710469	A	0.3493	0.2994	-0.0456	0.007594		11263	rs13416291	G	0.2759	0.3052	-0.0384
11375	1	175604345	177376746	LINC01645,ENSG00000227579	-0.0642	-0.0585	-0.06024	0.01	0.01768	0.015664		11375	rs12135765	T	0.09643	0.1086	-0.0642	0.01		11375	rs2902103	G	0.1306	0.1189	-0.0593	0.01765		11375	rs10913311	A	0.1123	0.1103	-0.0599	0.01534		11375	rs2902103	G	0.1027	0.1138	-0.0593	0.01765		11375	rs10913312	G	0.1041	0.1264	-0.0585
11434	19	45865002	50563446	ERCC2	0.0373	0.0444	0.04006	0.00479	0.01946	0.0136672		11434	rs1618536	T	0.4634	0.4418	0.0373	0.01946		11434	rs171140	C	0.4789	0.439	0.0444	0.00479		11434	rs1618536	T	0.4813	0.4461	0.0373	0.01946		11434	rs1618536	T	0.4236	0.3929	0.0373	0.01946		11434	rs238404	C	0.4915	0.4665	0.044
11456	8	117838623	117910403	UTP23	0.0316	0.0526	0.04808	0.01017	0.1065	0.030176		11456	rs10081574	C	0.1882	0.1793	0.0518	0.01202		11456	rs10109496	A	0.2093	0.1616	0.0316	0.1065		11456	rs10081574	C	0.1637	0.1538	0.0518	0.01202		11456	rs10108200	C	0.2329	0.1867	0.0526	0.01017		11456	rs10108200	C	0.2059	0.1837	0.0526
11638	1	21774044	21901457	ALPL	-0.0662	-0.0297	-0.037	0.007328	0.2661	0.214346		11638	rs1697404	A	0.1	0.08592	-0.0297	0.2661		11638	rs3767150	A	0.08848	0.1402	-0.0662	0.007328		11638	rs1697404	A	0.08824	0.09576	-0.0297	0.2661		11638	rs1697404	A	0.09589	0.1048	-0.0297	0.2661		11638	rs1697404	A	0.08342	0.1041	-0.0297
11786	13	50446356	51548355	RNASEH2B	0.0507	0.0534	0.05178	0.01008	0.01501	0.013038		11786	rs11616524	T	0.1875	0.1796	0.0534	0.01008		11786	rs11617366	T	0.1854	0.1963	0.0507	0.01501		11786	rs11616524	T	0.1889	0.1564	0.0534	0.01008		11786	rs11617366	T	0.1781	0.1837	0.0507	0.01501		11786	rs11617366	T	0.1756	0.1532	0.0507
12095	13	45619563	46725556	LCP1,CPB2-AS1	0.0267	0.056	0.03612	0.004214	0.1636	0.102949		12095	rs6561296	C	0.2232	0.1996	0.056	0.004214		12095	rs9595422	G	0.243	0.2439	0.0274	0.1636		12095	rs10492452	A	0.2326	0.1964	0.0267	0.1626		12095	rs10492452	A	0.1849	0.2156	0.0267	0.1626		12095	rs11618144	G	0.236	0.2036	0.0438
12401	2	202172222	202451984	C2CD6	0.0703	0.0935	0.08238	0.005704	0.0346	0.0174148		12401	rs11690916	G	0.06429	0.05599	0.0827	0.01559		12401	rs2160241	G	0.05478	0.02744	0.0703	0.0346		12401	rs10931963	T	0.05456	0.04	0.0935	0.005704		12401	rs11690916	G	0.06164	0.05689	0.0827	0.01559		12401	rs11690916	G	0.05609	0.05373	0.0827
12460	12	37095925	38843441		-0.0726	-0.0483	-0.06106	0.009004	0.07138	0.0350048		12460	rs7485262	C	0.08961	0.1096	-0.0647	0.01856		12460	rs7485262	C	0.08169	0.122	-0.0647	0.01856		12460	rs10881019	T	0.08021	0.0703	-0.055	0.07138		12460	rs7961495	G	0.1233	0.1024	-0.0483	0.05752		12460	rs10880998	G	0.1	0.08871	-0.0726
12613	14	91988546	92918793	SLC24A4	-0.0449	-0.0436	-0.04438	0.004732	0.005148	0.0048984		12613	rs7142428	T	0.392	0.4112	-0.0449	0.004732		12613	rs7143416	G	0.434	0.4421	-0.0436	0.005148		12613	rs7143416	G	0.4082	0.4479	-0.0436	0.005148		12613	rs7142428	T	0.4863	0.4281	-0.0449	0.004732		12613	rs7142428	T	0.3948	0.4306	-0.0449
12772	21	26465979	27553309	ENSG00000224541,APP-DT	-0.0393	-0.0373	-0.0377	0.01612	0.01628	0.016152		12772	rs466448	G	0.4143	0.4667	-0.0373	0.01612		12772	rs466448	G	0.5	0.4756	-0.0373	0.01612		12772	rs466448	G	0.4439	0.4661	-0.0373	0.01612		12772	rs466448	G	0.4167	0.491	-0.0373	0.01612		12772	rs465353	G	0.463	0.4919	-0.0393
13267	18	13574400	13584639	LDLRAD4	-0.0496	-0.0433	-0.04456	0.004735	0.01111	0.009835		13267	rs1284403	A	0.2982	0.2705	-0.0433	0.01111		13267	rs1290366	T	0.257	0.2683	-0.0496	0.004735		13267	rs1284403	A	0.2941	0.2612	-0.0433	0.01111		13267	rs1284403	A	0.2671	0.2754	-0.0433	0.01111		13267	rs1284403	A	0.2725	0.3135	-0.0433
13930	8	100191783	100610705	VPS13B	-0.0538	-0.0344	-0.04074	0.005035	0.08233	0.045047		13930	rs12542214	C	0.1893	0.2079	-0.0412	0.03137		13930	rs3103731	T	0.2163	0.2165	-0.0344	0.08233		13930	rs10955215	A	0.1863	0.2024	-0.0391	0.04057		13930	rs3134172	T	0.1712	0.2018	-0.0538	0.005035		13930	rs10808361	G	0.2298	0.2013	-0.0352
13960	4	78343820	78639592		0.0481	0.0643	0.06106	0.005049	0.02729	0.0094972		13960	rs10518177	T	0.1384	0.1353	0.0643	0.005049		13960	rs12649862	A	0.1587	0.1128	0.0481	0.02729		13960	rs10518177	T	0.1408	0.1376	0.0643	0.005049		13960	rs10518177	T	0.1233	0.1497	0.0643	0.005049		13960	rs10518177	T	0.1479	0.1181	0.0643
14531	8	103576658	103645834		0.0482	0.0482	0.0482	0.005784	0.005784	0.005784		14531	rs2436889	A	0.2701	0.2483	0.0482	0.005784		14531	rs2436889	A	0.2683	0.2622	0.0482	0.005784		14531	rs2436889	A	0.2554	0.2806	0.0482	0.005784		14531	rs2436889	A	0.2671	0.2844	0.0482	0.005784		14531	rs2436889	A	0.2634	0.2392	0.0482
14630	12	50569015	52282748	ANKRD33	-0.0371	-0.029	-0.03386	0.04	0.1092	0.06768		14630	rs697635	A	0.3295	0.3187	-0.0371	0.04		14630	rs697635	A	0.3048	0.3689	-0.0371	0.04		14630	rs697635	A	0.3102	0.3337	-0.0371	0.04		14630	rs706830	C	0.3562	0.3494	-0.029	0.1092		14630	rs706830	C	0.3443	0.3861	-0.029
14818	7	133299165	133648625	EXOC4	0.0386	0.0429	0.0396	0.007865	0.01927	0.015093		14818	rs11773892	T	0.3491	0.3481	0.0393	0.01927		14818	rs2860599	A	0.3567	0.2866	0.0386	0.01611		14818	rs2860599	A	0.3589	0.3327	0.0386	0.01611		14818	rs2860599	A	0.3151	0.3061	0.0386	0.01611		14818	rs10269665	G	0.371	0.3354	0.0429
14987	17	2996430	3060441		0.0476	0.056	0.05368	0.0139	0.02798	0.016828		14987	rs8077339	C	0.1582	0.1403	0.056	0.0139		14987	rs8077339	C	0.1348	0.1494	0.056	0.0139		14987	rs4790441	C	0.1795	0.1539	0.0528	0.01446		14987	rs8077339	C	0.1438	0.1557	0.056	0.0139		14987	rs8074920	T	0.1611	0.1703	0.0476
15071	17	21660480	21736353		-0.0542	-0.0415	-0.04404	0.007889	0.02842	0.0243138		15071	rs17052370	T	0.2375	0.2616	-0.0415	0.02842		15071	rs17052370	T	0.2233	0.2744	-0.0415	0.02842		15071	rs17052370	T	0.2509	0.2439	-0.0415	0.02842		15071	rs17052370	T	0.2329	0.2121	-0.0415	0.02842		15071	rs17052344	A	0.214	0.2007	-0.0542
15120	13	21423954	22525954		-0.0843	-0.0825	-0.08286	0.005552	0.005576	0.0055712		15120	rs3117951	T	0.06161	0.07871	-0.0825	0.005576		15120	rs3117951	T	0.06742	0.05793	-0.0825	0.005576		15120	rs3117951	T	0.08556	0.07646	-0.0825	0.005576		15120	rs3117951	T	0.09589	0.07186	-0.0825	0.005576		15120	rs3117950	T	0.07256	0.08797	-0.0843
15164	3	119984085	121466775	GPR156	0.0787	0.0922	0.0814	0.009282	0.01828	0.0164804		15164	rs1873652	A	0.06339	0.05432	0.0787	0.01828		15164	rs1873652	A	0.05056	0.04268	0.0787	0.01828		15164	rs1873652	A	0.07143	0.04545	0.0787	0.01828		15164	rs1873652	A	0.08904	0.06886	0.0787	0.01828		15164	rs10934526	A	0.04888	0.04758	0.0922
15184	13	108551465	109753464	MYO16	0.0435	0.0435	0.0435	0.02292	0.02292	0.02292		15184	rs157000	A	0.2062	0.1918	0.0435	0.02292		15184	rs157000	A	0.2177	0.2104	0.0435	0.02292		15184	rs157000	A	0.2228	0.1855	0.0435	0.02292		15184	rs157000	A	0.1986	0.1946	0.0435	0.02292		15184	rs157000	A	0.2121	0.1887	0.0435
15226	19	45372354	50064799	NECTIN2	-0.05	-0.0431	-0.04862	0.005597	0.01882	0.0082416		15226	rs8104483	G	0.2598	0.2899	-0.05	0.005597		15226	rs8104483	G	0.2521	0.314	-0.05	0.005597		15226	rs4803767	T	0.2424	0.2873	-0.0431	0.01882		15226	rs8104483	G	0.2808	0.2636	-0.05	0.005597		15226	rs8104483	G	0.272	0.2801	-0.05
15278	1	116015802	116226005	VANGL1	0.0338	0.0468	0.04264	0.005618	0.0409	0.0161788		15278	rs10801913	A	0.3384	0.3126	0.0468	0.005618		15278	rs6699583	T	0.3118	0.2652	0.039	0.02314		15278	rs10801913	A	0.3387	0.2952	0.0468	0.005618		15278	rs10801913	A	0.3425	0.3204	0.0468	0.005618		15278	rs10754332	C	0.327	0.3315	0.0338
15620	19	8648140	8789773		0.0471	0.0505	0.04816	0.008832	0.01405	0.0124424		15620	rs12151343	T	0.2446	0.2256	0.049	0.01123		15620	rs4804078	A	0.1938	0.2134	0.0471	0.01405		15620	rs4804078	A	0.2406	0.2139	0.0471	0.01405		15620	rs4804078	A	0.2671	0.1747	0.0471	0.01405		15620	rs11085873	T	0.2239	0.1866	0.0505
15635	22	40027284	41697338		0.0399	0.0433	0.04222	0.009236	0.01857	0.0123444		15635	rs2024566	G	0.342	0.3226	0.0433	0.009236		15635	rs2235852	T	0.3258	0.3323	0.0423	0.01234		15635	rs2024566	G	0.3619	0.3133	0.0433	0.009236		15635	rs2235852	T	0.3014	0.3242	0.0423	0.01234		15635	rs5751072	A	0.3422	0.3213	0.0399
15837	5	71683885	71729655		-0.047	-0.0406	-0.04188	0.005863	0.01878	0.0161966		15837	rs4703855	T	0.2902	0.2755	-0.0406	0.01878		15837	rs9293289	A	0.2893	0.2866	-0.047	0.005863		15837	rs4703855	T	0.2816	0.2992	-0.0406	0.01878		15837	rs4703855	T	0.3356	0.2545	-0.0406	0.01878		15837	rs4703855	T	0.29	0.3162	-0.0406
15856	9	27226947	27247314	LINC00032	-0.0277	-0.0191	-0.02378	0.07534	0.2248	0.142776		15856	rs2057362	C	0.3821	0.403	-0.0222	0.1692		15856	rs7024846	T	0.4256	0.3933	-0.0277	0.07534		15856	rs2057362	C	0.4055	0.4055	-0.0222	0.1692		15856	rs7024846	T	0.4932	0.4401	-0.0277	0.07534		15856	rs1014049	T	0.4105	0.3833	-0.0191
15897	7	111062889	111275653		-0.0603	-0.0421	-0.05346	0.006587	0.03219	0.0146174		15897	rs10253118	T	0.1625	0.1815	-0.0603	0.01057		15897	rs2613611	C	0.1451	0.1768	-0.0421	0.03219		15897	rs10253118	T	0.1426	0.1836	-0.0603	0.01057		15897	rs2969506	T	0.08904	0.1311	-0.0547	0.006587		15897	rs2613612	C	0.1732	0.1902	-0.0499
16136	11	16859250	16896925	PLEKHA7	-0.0498	-0.0431	-0.04498	0.005991	0.02134	0.0150782		16136	rs11024058	T	0.2536	0.2317	-0.044	0.01602		16136	rs17772101	T	0.2626	0.2348	-0.0498	0.005991		16136	rs4757441	T	0.2317	0.2667	-0.0431	0.02134		16136	rs11024058	T	0.2123	0.2605	-0.044	0.01602		16136	rs11024058	T	0.2487	0.2326	-0.044
16229	9	22430804	22450095		-0.0576	-0.0435	-0.05334	0.009654	0.04518	0.0205788		16229	rs1576334	T	0.1317	0.1436	-0.0576	0.009654		16229	rs16906084	A	0.1545	0.1636	-0.0552	0.01602		16229	rs665908	A	0.1625	0.1396	-0.0435	0.04518		16229	rs16906084	A	0.1918	0.1377	-0.0552	0.01602		16229	rs16906084	A	0.1211	0.155	-0.0552
16463	15	77131187	79344132	RASGRF1	-0.0581	-0.0581	-0.0581	0.0176	0.0176	0.0176		16463	rs16970502	G	0.1116	0.1402	-0.0581	0.0176		16463	rs16970502	G	0.139	0.1494	-0.0581	0.0176		16463	rs16970502	G	0.1417	0.1467	-0.0581	0.0176		16463	rs16970502	G	0.1458	0.1437	-0.0581	0.0176		16463	rs16970502	G	0.1287	0.1711	-0.0581
16801	19	36480674	41175672		-0.0606	-0.0513	-0.05316	0.006866	0.03262	0.0274692		16801	rs7248046	A	0.15	0.1436	-0.0513	0.03262		16801	rs7248046	A	0.1166	0.1585	-0.0513	0.03262		16801	rs4805149	T	0.1266	0.163	-0.0606	0.006866		16801	rs7248046	A	0.1507	0.1121	-0.0513	0.03262		16801	rs7248046	A	0.1217	0.1198	-0.0513
17191	15	77234865	79461516	ANKRD34C-AS1	0.0374	0.0379	0.0378	0.01452	0.01674	0.016296		17191	rs11072826	G	0.4919	0.4867	0.0379	0.01674		17191	rs11072826	G	0.5	0.4787	0.0379	0.01674		17191	rs4778651	A	0.4938	0.4939	0.0374	0.01452		17191	rs11072826	G	0.4795	0.488	0.0379	0.01674		17191	rs11072826	G	0.4926	0.4631	0.0379
17242	1	31013899	31241312		0.0463	0.0511	0.04726	0.009964	0.01846	0.0167608		17242	rs12736883	A	0.1946	0.1746	0.0463	0.01846		17242	rs3762297	T	0.1798	0.1555	0.0511	0.009964		17242	rs12736883	A	0.172	0.1939	0.0463	0.01846		17242	rs12736883	A	0.1458	0.2048	0.0463	0.01846		17242	rs12736883	A	0.1974	0.1759	0.0463
17291	13	80259140	81357742	ENSG00000286746	-0.0608	-0.055	-0.05884	0.007589	0.0192	0.0115274		17291	rs1853300	A	0.1134	0.143	-0.0608	0.007589		17291	rs1853300	A	0.118	0.128	-0.0608	0.007589		17291	rs1114275	T	0.1248	0.1292	-0.0568	0.01567		17291	rs1853300	A	0.1575	0.1636	-0.0608	0.007589		17291	rs17073161	G	0.1168	0.1449	-0.055
17356	2	172577431	172866105	SLC25A12,HAT1	-0.0368	-0.0328	-0.0356	0.01842	0.04237	0.024328		17356	rs4280427	G	0.483	0.4667	-0.0328	0.04237		17356	rs7584187	G	0.448	0.4878	-0.0368	0.01842		17356	rs6718013	A	0.4376	0.4739	-0.0348	0.02401		17356	rs7584187	G	0.4384	0.491	-0.0368	0.01842		17356	rs7584187	G	0.451	0.4568	-0.0368
17482	5	29557296	29593053		-0.0499	-0.0499	-0.0499	0.01077	0.01077	0.01077		17482	rs10058895	A	0.1589	0.2029	-0.0499	0.01077		17482	rs10058895	A	0.198	0.2073	-0.0499	0.01077		17482	rs10058895	A	0.1943	0.22	-0.0499	0.01077		17482	rs10058895	A	0.1575	0.1946	-0.0499	0.01077		17482	rs10058895	A	0.2057	0.1921	-0.0499
17495	1	63039308	63341281	ATG4C	0.0393	0.0573	0.05216	0.006878	0.07067	0.021362		17495	rs10493328	A	0.1545	0.1404	0.0548	0.00964		17495	rs17123830	G	0.1545	0.1768	0.0546	0.009982		17495	rs10493328	A	0.1515	0.1339	0.0548	0.00964		17495	rs12061691	A	0.2055	0.1467	0.0573	0.006878		17495	rs11208029	G	0.1746	0.1523	0.0393
17558	3	107354130	108836820	BBX	0.0431	0.0431	0.0431	0.006628	0.006628	0.006628		17558	rs643938	T	0.458	0.439	0.0431	0.006628		17558	rs643938	T	0.4846	0.4573	0.0431	0.006628		17558	rs643938	T	0.451	0.4503	0.0431	0.006628		17558	rs643938	T	0.4658	0.4731	0.0431	0.006628		17558	rs643938	T	0.4585	0.4176	0.0431
17866	7	11758146	11802758	THSD7A	0.0193	0.0298	0.02516	0.2309	0.4291	0.31782		17866	rs1467344	C	0.1147	0.09232	0.0248	0.329		17866	rs1467344	C	0.1053	0.128	0.0248	0.329		17866	rs10950366	C	0.1069	0.09828	0.0271	0.2711		17866	rs1467345	A	0.1027	0.09036	0.0193	0.4291		17866	rs10276715	A	0.1193	0.09982	0.0298
17960	6	28302113	28372660	ZSCAN31	0.0798	0.0961	0.08886	0.01236	0.03137	0.020898		17960	rs10484542	A	0.05	0.03991	0.0879	0.02207		17960	rs16893973	T	0.05337	0.02439	0.0961	0.01236		17960	rs3800324	A	0.04724	0.04061	0.0798	0.03137		17960	rs10484542	A	0.06338	0.02424	0.0879	0.02207		17960	rs16893975	C	0.05	0.03507	0.0926
18369	4	77208412	77438426	FAM47E-STBD1,ENSG00000287401	0.0383	0.0473	0.0437	0.00802	0.03636	0.019356		18369	rs6532327	C	0.2478	0.23	0.0383	0.03636		18369	rs6532327	C	0.2549	0.2591	0.0383	0.03636		18369	rs6830162	G	0.2888	0.2655	0.0473	0.00802		18369	rs6830162	G	0.2397	0.2874	0.0473	0.00802		18369	rs6830162	G	0.2797	0.2518	0.0473
18436	6	118807847	118920285	CEP85L	-0.0368	-0.0318	-0.03394	0.0727	0.1058	0.09264		18436	rs10484289	C	0.1747	0.197	-0.0318	0.1058		18436	rs9489457	T	0.184	0.1738	-0.0368	0.0727		18436	rs25422	T	0.1693	0.1897	-0.0337	0.0949		18436	rs25422	T	0.169	0.2108	-0.0337	0.0949		18436	rs25422	T	0.1865	0.2177	-0.0337
18479	8	72333781	72490598	EYA1	-0.0496	-0.0349	-0.04114	0.007056	0.04251	0.0246932		18479	rs13264641	C	0.2728	0.2982	-0.0442	0.01303		18479	rs7825729	G	0.2346	0.3201	-0.0406	0.02108		18479	rs4379481	A	0.2911	0.2895	-0.0349	0.04251		18479	rs4439163	C	0.3014	0.3133	-0.0364	0.03979		18479	rs13274765	G	0.2709	0.2805	-0.0496
18544	5	66078314	66174994	MAST4	-0.0515	-0.047	-0.05024	0.0159	0.02811	0.019036		18544	rs2441109	G	0.1512	0.1624	-0.0511	0.01665		18544	rs258081	A	0.1306	0.1677	-0.0515	0.0159		18544	rs2441109	G	0.1482	0.1818	-0.0511	0.01665		18544	rs33696	G	0.1507	0.1228	-0.047	0.02811		18544	rs26388	T	0.138	0.1589	-0.0505
18588	22	39940188	41610242	L3MBTL2,L3MBTL2-AS1	-0.0353	-0.0308	-0.03272	0.02661	0.0624	0.044152		18588	rs139451	A	0.3768	0.3975	-0.0353	0.02661		18588	rs2076577	T	0.3385	0.3902	-0.0308	0.0624		18588	rs139453	G	0.3422	0.3758	-0.0331	0.03651		18588	rs139453	G	0.3699	0.3293	-0.0331	0.03651		18588	rs1033611	A	0.3511	0.3903	-0.0313
18689	11	81873715	82196876	MIR4300HG	0.0981	0.1072	0.10174	0.007144	0.01302	0.0106696		18689	rs7111488	T	0.03929	0.03271	0.1072	0.007144		18689	rs7111488	T	0.0323	0.03354	0.1072	0.007144		18689	rs4944395	A	0.0508	0.03152	0.0981	0.01302		18689	rs4944395	A	0.02055	0.02395	0.0981	0.01302		18689	rs4944395	A	0.04072	0.04113	0.0981
19052	14	39215357	40152962	ENSG00000258526	-0.0774	-0.0236	-0.03678	0.007316	0.4535	0.326523		19052	rs10483531	A	0.06708	0.06874	-0.0236	0.4535		19052	rs1950630	T	0.06882	0.1006	-0.0774	0.007316		19052	rs17109607	T	0.07679	0.06788	-0.0357	0.2648		19052	rs10483531	A	0.0411	0.0753	-0.0236	0.4535		19052	rs10483531	A	0.05901	0.07451	-0.0236
19157	14	34899865	35823231		0.0311	0.042	0.03712	0.009016	0.04504	0.0223732		19157	rs10135277	T	0.4393	0.4213	0.0375	0.01927		19157	rs8003074	C	0.4157	0.4238	0.0311	0.04504		19157	rs10140922	T	0.4383	0.4048	0.042	0.009016		19157	rs10135277	T	0.4178	0.4491	0.0375	0.01927		19157	rs10135277	T	0.4089	0.4237	0.0375
19405	18	72561380	74432840		0.029	0.0318	0.03112	0.05779	0.08528	0.066666		19405	rs4374266	A	0.3292	0.3043	0.0318	0.05779		19405	rs4393659	T	0.3315	0.311	0.0316	0.06342		19405	rs4393659	T	0.3321	0.3083	0.0316	0.06342		19405	rs4393659	T	0.3958	0.3204	0.0316	0.06342		19405	rs12964293	T	0.3451	0.3005	0.029
19415	15	64726582	66939528	LINC01169	0.0297	0.0331	0.03242	0.04004	0.05814	0.04366		19415	rs11638893	C	0.4446	0.4528	0.0331	0.04004		19415	rs6494591	G	0.4775	0.4207	0.0297	0.05814		19415	rs11638893	C	0.4822	0.4436	0.0331	0.04004		19415	rs11638893	C	0.4658	0.4371	0.0331	0.04004		19415	rs11638893	C	0.4427	0.4345	0.0331
19538	5	3834603	3887603		-0.0303	-0.0303	-0.0303	0.06387	0.06387	0.06387		19538	rs2963794	C	0.3723	0.3923	-0.0303	0.06387		19538	rs2963794	C	0.3862	0.372	-0.0303	0.06387		19538	rs2963794	C	0.3857	0.3852	-0.0303	0.06387		19538	rs2963794	C	0.411	0.3743	-0.0303	0.06387		19538	rs2963794	C	0.365	0.4005	-0.0303
20061	6	88325270	88427676	ORC3	0.0549	0.0594	0.05796	0.02164	0.02795	0.023316		20061	rs715207	A	0.1152	0.08925	0.0585	0.02164		20061	rs7769144	A	0.08873	0.08589	0.0549	0.02795		20061	rs715207	A	0.1078	0.08182	0.0585	0.02164		20061	rs715207	A	0.08219	0.1168	0.0585	0.02164		20061	rs16879704	C	0.1071	0.08961	0.0594
20154	8	9184529	9221939	ENSG00000248538	-0.0441	-0.0268	-0.03034	0.007807	0.08561	0.0693234		20154	rs11778929	A	0.4473	0.4018	-0.0268	0.08561		20154	rs11778929	A	0.4073	0.4695	-0.0268	0.08561		20154	rs11778929	A	0.451	0.4412	-0.0268	0.08561		20154	rs6999153	G	0.3681	0.4251	-0.0441	0.007807		20154	rs4841134	C	0.4341	0.4723	-0.0272
20206	16	54963288	56498712	AMFR	-0.0901	-0.0861	-0.0876	0.02238	0.0673	0.053604		20206	rs12325384	G	0.02411	0.0449	-0.0861	0.0673		20206	rs7188330	A	0.05337	0.04573	-0.0901	0.02238		20206	rs9933064	C	0.0303	0.03939	-0.0896	0.04374		20206	rs12325384	G	0.06164	0.03293	-0.0861	0.0673		20206	rs12325384	G	0.02898	0.03867	-0.0861
20664	18	20013591	21759593	CABYR,ENSG00000265750	-0.0364	-0.0314	-0.03532	0.03013	0.06054	0.036702		20664	rs1049684	C	0.3551	0.3797	-0.036	0.03258		20664	rs12963950	C	0.3553	0.3811	-0.0314	0.06054		20664	rs12604451	T	0.3289	0.3752	-0.0364	0.03013		20664	rs12604451	T	0.2808	0.3443	-0.0364	0.03013		20664	rs12604451	T	0.3155	0.321	-0.0364
21254	6	112948108	113049634		0.041	0.0472	0.04224	0.008323	0.01716	0.0151886		21254	rs9320411	T	0.2616	0.2844	0.041	0.01716		21254	rs9374351	A	0.2978	0.2331	0.041	0.01682		21254	rs1556973	T	0.2777	0.2706	0.0472	0.008323		21254	rs9374351	A	0.3425	0.3263	0.041	0.01682		21254	rs9374351	A	0.3275	0.2585	0.041
21484	2	156516611	156814699		-0.0457	-0.0354	-0.04158	0.01237	0.06618	0.033894		21484	rs10198113	C	0.225	0.2051	-0.0354	0.06618		21484	rs13421080	C	0.2268	0.2134	-0.0457	0.01237		21484	rs10198113	C	0.1934	0.2269	-0.0354	0.06618		21484	rs13421080	C	0.2055	0.2635	-0.0457	0.01237		21484	rs13421080	C	0.2275	0.2626	-0.0457
22198	15	27693153	29906312	TUBBP8	0.0789	0.0798	0.07962	0.02037	0.02373	0.023058		22198	rs2125657	T	0.05804	0.04656	0.0798	0.02373		22198	rs7177816	A	0.04213	0.05488	0.0789	0.02037		22198	rs2125657	T	0.05793	0.05697	0.0798	0.02373		22198	rs2125657	T	0.03425	0.03593	0.0798	0.02373		22198	rs2125657	T	0.0627	0.04309	0.0798
22308	7	34836526	34874038	NPSR1,NPSR1-AS1	0.0456	0.0491	0.0477	0.008803	0.01989	0.0132378		22308	rs12111597	A	0.2259	0.2112	0.0491	0.008803		22308	rs12111597	A	0.2177	0.1799	0.0491	0.008803		22308	rs12111597	A	0.2166	0.1952	0.0491	0.008803		22308	rs727162	G	0.2397	0.2216	0.0456	0.01989		22308	rs727162	G	0.21	0.1881	0.0456
22472	7	86920228	87103263	ABCB4	0.0228	0.0404	0.03688	0.00888	0.155	0.038104		22472	rs4148809	C	0.4714	0.4544	0.0228	0.155		22472	rs1202283	G	0.4466	0.4573	0.0404	0.00888		22472	rs1202283	G	0.4652	0.4479	0.0404	0.00888		22472	rs1202283	G	0.4452	0.4581	0.0404	0.00888		22472	rs1202283	G	0.438	0.4669	0.0404
22707	8	101717689	101791542	PABPC1	0.0396	0.0453	0.04302	0.008983	0.01722	0.0122778		22707	rs1039153	C	0.322	0.3078	0.0453	0.008983		22707	rs1039153	C	0.3132	0.2439	0.0453	0.008983		22707	rs1039153	C	0.2843	0.3164	0.0453	0.008983		22707	rs1693552	G	0.3219	0.3024	0.0396	0.01722		22707	rs1693552	G	0.3239	0.2952	0.0396
23088	12	102656495	104132365	STAB2	0.0499	0.057	0.05132	0.009173	0.01945	0.0173946		23088	rs1370785	A	0.1628	0.1475	0.0499	0.01945		23088	rs1370785	A	0.1292	0.1189	0.0499	0.01945		23088	rs1370785	A	0.1696	0.1291	0.0499	0.01945		23088	rs1370785	A	0.09722	0.1078	0.0499	0.01945		23088	rs10861088	T	0.1393	0.1426	0.057
23134	1	115673158	115871635	NGF,NGF-AS1	0.0749	0.0788	0.07646	0.01112	0.01269	0.012062		23134	rs17033692	C	0.06964	0.06153	0.0788	0.01112		23134	rs17033692	C	0.0618	0.04573	0.0788	0.01112		23134	rs12026714	G	0.07487	0.07898	0.0749	0.01269		23134	rs12026714	G	0.08904	0.06061	0.0749	0.01269		23134	rs12026714	G	0.09091	0.07532	0.0749
23561	11	22157339	22178677	ANO5,ENSG00000287962	0.0356	0.0426	0.0412	0.01108	0.02174	0.013212		23561	rs4244488	T	0.4205	0.398	0.0426	0.01108		23561	rs4244488	T	0.4129	0.4085	0.0426	0.01108		23561	rs10833711	G	0.4848	0.4636	0.0356	0.02174		23561	rs4244488	T	0.363	0.4277	0.0426	0.01108		23561	rs4244488	T	0.4419	0.4162	0.0426
23584	11	44262957	44306381	ALX4	0.0482	0.0482	0.0482	0.009399	0.009399	0.009399		23584	rs7939723	T	0.2402	0.2233	0.0482	0.009399		23584	rs7939723	T	0.257	0.2073	0.0482	0.009399		23584	rs7939723	T	0.2487	0.2321	0.0482	0.009399		23584	rs7939723	T	0.2192	0.256	0.0482	0.009399		23584	rs7939723	T	0.2482	0.218	0.0482
23669	20	52725482	53293207		-0.0477	-0.0466	-0.04728	0.01705	0.01976	0.018026		23669	rs6014118	T	0.1938	0.2201	-0.0466	0.01976		23669	rs6023482	C	0.1798	0.25	-0.0477	0.01705		23669	rs6014120	C	0.1881	0.1964	-0.0468	0.01888		23669	rs6023482	C	0.2123	0.2545	-0.0477	0.01705		23669	rs2206906	T	0.2003	0.2151	-0.0476
23858	22	19094595	20765021		-0.0457	-0.0364	-0.04012	0.009529	0.04296	0.0295876		23858	rs5761913	T	0.2482	0.2761	-0.0457	0.009529		23858	rs5761913	T	0.2879	0.2317	-0.0457	0.009529		23858	rs1013634	T	0.2558	0.2661	-0.0364	0.04296		23858	rs1013634	T	0.2917	0.2515	-0.0364	0.04296		23858	rs1013634	T	0.2418	0.277	-0.0364
24036	4	47538385	47952676	NIPAL1,CNGA1	0.0352	0.0427	0.04106	0.0129	0.02899	0.01655		24036	rs1012844	G	0.3795	0.3559	0.0352	0.02899		24036	rs1062858	C	0.2921	0.3171	0.0427	0.0129		24036	rs1062858	C	0.3137	0.2818	0.0427	0.0129		24036	rs9995122	T	0.3493	0.3114	0.0421	0.01455		24036	rs1371729	G	0.3228	0.2903	0.0426
24069	5	16655365	16709803	ENSG00000246214	-0.0415	-0.0372	-0.04046	0.01279	0.02003	0.014754		24069	rs388887	A	0.3357	0.3525	-0.0415	0.01279		24069	rs388887	A	0.4059	0.4024	-0.0415	0.01279		24069	rs876095	A	0.3516	0.3826	-0.0372	0.02003		24069	rs388887	A	0.3493	0.3735	-0.0415	0.01279		24069	rs2560837	T	0.3671	0.3781	-0.0406
24208	11	9628790	9672763		0.0366	0.0415	0.03812	0.009703	0.02284	0.0199946		24208	rs11042458	C	0.4509	0.4745	0.0375	0.02284		24208	rs11042458	C	0.4944	0.4543	0.0375	0.02284		24208	rs10770052	G	0.4928	0.4676	0.0366	0.02175		24208	rs11042458	C	0.4658	0.4789	0.0375	0.02284		24208	rs2082807	T	0.4873	0.4448	0.0415
24214	4	167645029	167881604		-0.0488	-0.0488	-0.0488	0.009707	0.009707	0.009707		24214	rs13109075	C	0.3429	0.3825	-0.0488	0.009707		24214	rs13109075	C	0.3736	0.3445	-0.0488	0.009707		24214	rs13109075	C	0.3777	0.379	-0.0488	0.009707		24214	rs13109075	C	0.3904	0.3952	-0.0488	0.009707		24214	rs13109075	C	0.3728	0.3986	-0.0488
24439	7	98597053	98769025		0.0439	0.0446	0.04446	0.009811	0.01152	0.0101528		24439	rs9297145	C	0.2764	0.2439	0.0446	0.009811		24439	rs9297145	C	0.2725	0.2165	0.0446	0.009811		24439	rs9297145	C	0.2754	0.2497	0.0446	0.009811		24439	rs9297145	C	0.2465	0.253	0.0446	0.009811		24439	rs4236540	G	0.2401	0.2664	0.0439
24607	13	61527775	62642843		0.0321	0.0386	0.03706	0.02132	0.061	0.030148		24607	rs11839700	A	0.3113	0.3213	0.0386	0.02132		24607	rs11839700	A	0.3104	0.2226	0.0386	0.02132		24607	rs17060783	C	0.3098	0.3028	0.0321	0.061		24607	rs11839700	A	0.2778	0.3025	0.0386	0.02132		24607	rs11843331	G	0.2924	0.3259	0.0374
24733	4	78562573	78781597		-0.0448	-0.0448	-0.0448	0.009957	0.009957	0.009957		24733	rs4859868	A	0.2545	0.2819	-0.0448	0.009957		24733	rs4859868	A	0.2528	0.2652	-0.0448	0.009957		24733	rs4859868	A	0.2709	0.2697	-0.0448	0.009957		24733	rs4859868	A	0.2192	0.2665	-0.0448	0.009957		24733	rs4859868	A	0.2608	0.2948	-0.0448
24734	13	48799089	49901088	CAB39L	-0.0435	-0.0371	-0.04088	0.01272	0.02811	0.018778		24734	rs1555672	C	0.2786	0.2943	-0.0435	0.01272		24734	rs4941637	A	0.3262	0.3137	-0.0382	0.02464		24734	rs1555672	C	0.279	0.3079	-0.0435	0.01272		24734	rs9316434	G	0.3082	0.3383	-0.0371	0.02811		24734	rs10459375	G	0.3099	0.3132	-0.0421
24875	3	37998557	38038982	CTDSPL	0.0427	0.0476	0.04482	0.01912	0.04444	0.032592		24875	rs10095	G	0.1857	0.1569	0.0476	0.01912		24875	rs6809649	C	0.1994	0.1707	0.0427	0.04444		24875	rs10095	G	0.1916	0.18	0.0476	0.01912		24875	rs11711286	T	0.1918	0.1557	0.0431	0.04014		24875	rs11711286	T	0.184	0.1619	0.0431
24953	15	34959356	37172064	ENSG00000259280	0.0335	0.0342	0.03364	0.03891	0.04046	0.04015		24953	rs11634677	G	0.3589	0.337	0.0342	0.03891		24953	rs8036656	A	0.3465	0.375	0.0335	0.04046		24953	rs8036656	A	0.3699	0.3422	0.0335	0.04046		24953	rs8036656	A	0.3219	0.2964	0.0335	0.04046		24953	rs8036656	A	0.3772	0.347	0.0335
25220	14	88600657	89530904		0.0374	0.0469	0.04098	0.01019	0.03323	0.023258		25220	rs1033875	A	0.275	0.2644	0.0402	0.02429		25220	rs1033875	A	0.2921	0.2378	0.0402	0.02429		25220	rs1033875	A	0.2786	0.2655	0.0402	0.02429		25220	rs11159883	C	0.2945	0.2725	0.0374	0.03323		25220	rs11159882	T	0.2808	0.2361	0.0469
25557	1	231156846	233123883	PCNX2	0.0432	0.0493	0.04672	0.01052	0.01794	0.013836		25557	rs2885	T	0.2554	0.2007	0.0471	0.01401		25557	rs2885	T	0.2514	0.25	0.0471	0.01401		25557	rs6424261	T	0.2504	0.2164	0.0469	0.0127		25557	rs3766496	T	0.1644	0.262	0.0493	0.01052		25557	rs12030659	A	0.2417	0.2368	0.0432
25654	15	93212109	95412779	ENSG00000277654	0.0416	0.0465	0.04258	0.0128	0.02323	0.021144		25654	rs8024991	C	0.2545	0.2345	0.0416	0.02323		25654	rs8024991	C	0.2725	0.247	0.0416	0.02323		25654	rs8024991	C	0.2549	0.237	0.0416	0.02323		25654	rs8024991	C	0.2603	0.2305	0.0416	0.02323		25654	rs17665080	G	0.2753	0.2364	0.0465
26374	16	77550043	78992542	WWOX	0.0341	0.0355	0.03494	0.02189	0.03262	0.026182		26374	rs10871358	A	0.4714	0.4523	0.0355	0.02189		26374	rs10871358	A	0.4831	0.4878	0.0355	0.02189		26374	rs10871358	A	0.4777	0.4642	0.0355	0.02189		26374	rs11150119	G	0.4726	0.494	0.0341	0.03262		26374	rs11150119	G	0.4914	0.4452	0.0341
26394	4	183121231	183358225	TENM3	-0.075	-0.075	-0.075	0.01075	0.01075	0.01075		26394	rs2726802	C	0.08766	0.1004	-0.075	0.01075		26394	rs2726802	C	0.07022	0.1463	-0.075	0.01075		26394	rs2726802	C	0.082	0.09951	-0.075	0.01075		26394	rs2726802	C	0.08219	0.08434	-0.075	0.01075		26394	rs2726802	C	0.07684	0.09459	-0.075
26613	5	5290797	5343797	ADAMTS16	-0.0398	-0.0398	-0.0398	0.01085	0.01085	0.01085		26613	rs11134106	A	0.3866	0.4113	-0.0398	0.01085		26613	rs11134106	A	0.4185	0.4543	-0.0398	0.01085		26613	rs11134106	A	0.3975	0.4229	-0.0398	0.01085		26613	rs11134106	A	0.4178	0.3713	-0.0398	0.01085		26613	rs11134106	A	0.4064	0.453	-0.0398
26614	5	64387048	64422804		0.0368	0.0368	0.0368	0.03623	0.03623	0.03623		26614	rs155338	T	0.2679	0.2844	0.0368	0.03623		26614	rs155338	T	0.3146	0.2348	0.0368	0.03623		26614	rs155338	T	0.2745	0.2715	0.0368	0.03623		26614	rs155338	T	0.274	0.3054	0.0368	0.03623		26614	rs155338	T	0.2907	0.263	0.0368
26622	10	61226992	61556986	CCDC6	0.0296	0.0403	0.03816	0.01161	0.056	0.02062		26622	rs10761414	T	0.4043	0.4356	0.0403	0.01183		26622	rs10761414	T	0.4424	0.4634	0.0403	0.01183		26622	rs10761414	T	0.4447	0.4061	0.0403	0.01183		26622	rs1913512	C	0.4178	0.4162	0.0403	0.01161		26622	rs1877793	T	0.4295	0.4023	0.0296
26769	2	86862999	87009742		-0.0402	-0.0369	-0.03756	0.01093	0.01802	0.016602		26769	rs2367376	C	0.4107	0.4285	-0.0402	0.01093		26769	rs938487	G	0.4535	0.4299	-0.0369	0.01802		26769	rs938487	G	0.418	0.4806	-0.0369	0.01802		26769	rs938487	G	0.411	0.4551	-0.0369	0.01802		26769	rs938487	G	0.4437	0.4517	-0.0369
26895	13	28786866	29888866	MTUS2	0.0449	0.0473	0.04586	0.01099	0.01437	0.013018		26895	rs9508344	G	0.2268	0.2084	0.0449	0.01437		26895	rs9508344	G	0.2388	0.2561	0.0449	0.01437		26895	rs17657154	C	0.2375	0.2172	0.0473	0.01099		26895	rs9508344	G	0.2603	0.2156	0.0449	0.01437		26895	rs17657154	C	0.2424	0.2191	0.0473
27067	8	107413542	107485678	OXR1	0.0362	0.0433	0.04046	0.01427	0.04372	0.02605		27067	rs10955421	T	0.2804	0.2306	0.0433	0.01427		27067	rs4734914	T	0.264	0.253	0.0362	0.04372		27067	rs4734914	T	0.2763	0.237	0.0362	0.04372		27067	rs10955421	T	0.2671	0.2651	0.0433	0.01427		27067	rs10955421	T	0.2561	0.2243	0.0433
27079	5	86176744	86213529	MEF2C	0.0394	0.0413	0.0398	0.01108	0.01638	0.015176		27079	rs13161175	A	0.3589	0.3204	0.0394	0.01638		27079	rs13161175	A	0.3694	0.314	0.0394	0.01638		27079	rs2471042	A	0.3494	0.3091	0.0413	0.01108		27079	rs13161175	A	0.2466	0.3144	0.0394	0.01638		27079	rs12516449	G	0.3448	0.3126	0.0395
27270	6	148415145	148474865		-0.0556	-0.0504	-0.05378	0.01116	0.0203	0.013846		27270	rs9377106	C	0.1571	0.1497	-0.0556	0.01116		27270	rs9377106	C	0.1563	0.1768	-0.0556	0.01116		27270	rs12662936	G	0.142	0.1657	-0.0517	0.01545		27270	rs9377106	C	0.137	0.1497	-0.0556	0.01116		27270	rs12662794	T	0.1289	0.1673	-0.0504
27496	4	39208323	39537738	UGDH-AS1	0.0316	0.0419	0.03366	0.01127	0.04587	0.03895		27496	rs13101951	T	0.408	0.3808	0.0419	0.01127		27496	rs2381387	G	0.3469	0.3963	0.0316	0.04587		27496	rs2381387	G	0.4011	0.3617	0.0316	0.04587		27496	rs2381387	G	0.3493	0.3515	0.0316	0.04587		27496	rs2381387	G	0.4022	0.4146	0.0316
27549	11	116682813	117177603	BACE1	-0.0406	-0.0379	-0.04006	0.01129	0.0259	0.014212		27549	rs548381	T	0.3545	0.3803	-0.0379	0.0259		27549	rs687740	C	0.3848	0.4024	-0.0406	0.01129		27549	rs687740	C	0.393	0.3709	-0.0406	0.01129		27549	rs687740	C	0.3562	0.3515	-0.0406	0.01129		27549	rs687740	C	0.3656	0.4011	-0.0406
27560	1	242061664	243995041	AKT3	0.0353	0.0393	0.0376	0.02171	0.03831	0.026846		27560	rs10157763	T	0.3188	0.3002	0.0393	0.02212		27560	rs4658588	A	0.3441	0.3323	0.0381	0.02171		27560	rs10157763	T	0.328	0.2961	0.0393	0.02212		27560	rs971285	G	0.3425	0.3353	0.0353	0.03831		27560	rs10927044	G	0.3251	0.2952	0.036
28026	13	80141795	81243794	PWWP2AP1	-0.0474	-0.045	-0.04644	0.01657	0.02337	0.01929		28026	rs1176324	G	0.1643	0.2051	-0.045	0.02337		28026	rs1176324	G	0.1671	0.1921	-0.045	0.02337		28026	rs1176283	A	0.1729	0.18	-0.0474	0.01657		28026	rs1176283	A	0.2123	0.2186	-0.0474	0.01657		28026	rs1176283	A	0.1625	0.1941	-0.0474
28714	2	16686217	16822736	CYRIA	0.0715	0.0781	0.07574	0.01186	0.01922	0.013578		28714	rs7597205	A	0.06696	0.07317	0.0715	0.01922		28714	rs80329834	A	0.06039	0.08841	0.0769	0.01186		28714	rs13431048	T	0.09447	0.07152	0.0761	0.01221		28714	rs13431048	T	0.0625	0.07143	0.0761	0.01221		28714	rs7420179	G	0.08623	0.06655	0.0781
28732	17	3632752	3686003	ITGAE	0.0755	0.0755	0.0755	0.02819	0.02819	0.02819		28732	rs17822998	T	0.06607	0.08038	0.0755	0.02819		28732	rs17822998	T	0.0904	0.09688	0.0755	0.02819		28732	rs17822998	T	0.09018	0.07238	0.0755	0.02819		28732	rs17822998	T	0.07534	0.08589	0.0755	0.02819		28732	rs17822998	T	0.08493	0.06868	0.0755
28809	15	52151396	54362477	UNC13C	0.037	0.0373	0.03706	0.02238	0.02303	0.02251		28809	rs11071022	T	0.4143	0.3914	0.037	0.02238		28809	rs11071022	T	0.4298	0.4055	0.037	0.02238		28809	rs10518755	T	0.3904	0.3885	0.0373	0.02303		28809	rs11071022	T	0.4247	0.3946	0.037	0.02238		28809	rs11071022	T	0.4227	0.3855	0.037
28997	11	44956181	44999605		0.045	0.0471	0.04552	0.01653	0.01846	0.017012		28997	rs10838395	T	0.2089	0.1951	0.0471	0.01701		28997	rs2279359	A	0.2247	0.2256	0.045	0.01653		28997	rs2279359	A	0.2411	0.2118	0.045	0.01653		28997	rs2279359	A	0.226	0.2246	0.045	0.01653		28997	rs12794846	G	0.2173	0.2285	0.0455
29007	1	21341051	21534055		-0.0353	-0.025	-0.03252	0.02477	0.1057	0.043246		29007	rs12128470	C	0.4347	0.459	-0.0353	0.02477		29007	rs6689852	C	0.434	0.4695	-0.0342	0.02674		29007	rs12128470	C	0.4277	0.4573	-0.0353	0.02477		29007	rs1609558	C	0.4932	0.4634	-0.0328	0.03425		29007	rs10218584	G	0.4299	0.462	-0.025
29109	7	5780459	5814178	RNF216	0.0286	0.0365	0.03198	0.02243	0.06707	0.048072		29109	rs10951960	T	0.4152	0.3836	0.0365	0.02243		29109	rs6944358	T	0.4761	0.4512	0.0286	0.06707		29109	rs6967635	G	0.4537	0.4564	0.0298	0.06124		29109	rs6944358	T	0.3973	0.4329	0.0286	0.06707		29109	rs2112006	A	0.3859	0.3514	0.0364
29154	2	172198472	172490226		-0.0306	-0.0275	-0.02998	0.05785	0.1019	0.06666		29154	rs10432422	T	0.3018	0.3176	-0.0275	0.1019		29154	rs10930488	G	0.3287	0.4085	-0.0306	0.05785		29154	rs10930488	G	0.3476	0.3527	-0.0306	0.05785		29154	rs10930488	G	0.3562	0.3892	-0.0306	0.05785		29154	rs10930488	G	0.3407	0.3533	-0.0306
29218	8	118482622	118552029		-0.0429	-0.0375	-0.04166	0.01288	0.025	0.015896		29218	rs11991492	C	0.3143	0.3315	-0.0425	0.01436		29218	rs1352557	C	0.3132	0.2988	-0.0429	0.01288		29218	rs11991492	C	0.328	0.3182	-0.0425	0.01436		29218	rs1352557	C	0.274	0.3313	-0.0429	0.01288		29218	rs10095558	C	0.3142	0.353	-0.0375
29257	18	29270153	31016155	CCDC178	0.0469	0.0469	0.0469	0.03045	0.03045	0.03045		29257	rs1457890	T	0.167	0.1376	0.0469	0.03045		29257	rs1457890	T	0.1222	0.1646	0.0469	0.03045		29257	rs1457890	T	0.15	0.1497	0.0469	0.03045		29257	rs1457890	T	0.1712	0.1497	0.0469	0.03045		29257	rs1457890	T	0.1605	0.1386	0.0469
29456	10	99115939	99167436	RRP12	-0.0344	-0.0298	-0.03244	0.03599	0.07208	0.052574		29456	rs2275580	C	0.3946	0.4152	-0.0341	0.04136		29456	rs954148	C	0.3567	0.3811	-0.0344	0.03599		29456	rs2275580	C	0.3645	0.4127	-0.0341	0.04136		29456	rs7895646	C	0.4452	0.397	-0.0298	0.07208		29456	rs7895646	C	0.417	0.4372	-0.0298
30081	14	36278007	37208256	SLC25A21	-0.0468	-0.0442	-0.04576	0.01256	0.01775	0.014636		30081	rs10135196	A	0.2062	0.2231	-0.0442	0.01775		30081	rs10135196	A	0.2303	0.2073	-0.0442	0.01775		30081	rs1950356	T	0.246	0.2406	-0.0468	0.01256		30081	rs1950356	T	0.2466	0.2096	-0.0468	0.01256		30081	rs1950356	T	0.2204	0.2592	-0.0468
30393	4	5324579	5377627	STK32B	0.0206	0.0608	0.04084	0.01271	0.3704	0.17249		30393	rs10028484	T	0.1179	0.09146	0.0511	0.05447		30393	rs6853980	A	0.1503	0.1534	0.0206	0.3704		30393	rs10028484	T	0.1221	0.09212	0.0511	0.05447		30393	rs6853980	A	0.1408	0.1325	0.0206	0.3704		30393	rs10021605	A	0.1247	0.127	0.0608
31141	4	172199176	172452879		-0.0554	-0.045	-0.0516	0.01308	0.06307	0.031104		31141	rs13135493	C	0.1446	0.1441	-0.0554	0.01308		31141	rs13135493	C	0.111	0.1677	-0.0554	0.01308		31141	rs7689380	G	0.1376	0.1399	-0.045	0.06307		31141	rs13135493	C	0.06849	0.1372	-0.0554	0.01308		31141	rs13120610	C	0.1221	0.1449	-0.0468
31573	9	106693247	107653426	ABCA1	0.0447	0.0447	0.0447	0.0545	0.0545	0.0545		31573	rs12686004	A	0.1152	0.1292	0.0447	0.0545		31573	rs12686004	A	0.118	0.1189	0.0447	0.0545		31573	rs12686004	A	0.1384	0.111	0.0447	0.0545		31573	rs12686004	A	0.137	0.1205	0.0447	0.0545		31573	rs12686004	A	0.1396	0.1192	0.0447
31944	12	42567716	44282166	TMEM117	0.035	0.0413	0.03966	0.124	0.2053	0.1464		31944	rs7965635	A	0.1036	0.09046	0.0413	0.124		31944	rs7965635	A	0.1067	0.1074	0.0413	0.124		31944	rs1731427	T	0.1007	0.1098	0.0394	0.1547		31944	rs7965635	A	0.07534	0.1168	0.0413	0.124		31944	rs2614394	A	0.1023	0.08094	0.035
32046	10	91825270	91835290	LINC01374,ENSG00000287150	-0.0356	-0.0356	-0.0356	0.03462	0.03462	0.03462		32046	rs2182239	T	0.3598	0.413	-0.0356	0.03462		32046	rs2182239	T	0.3441	0.4024	-0.0356	0.03462		32046	rs2182239	T	0.377	0.3855	-0.0356	0.03462		32046	rs2182239	T	0.4521	0.3862	-0.0356	0.03462		32046	rs2182239	T	0.3882	0.4141	-0.0356
32054	20	834546	886546	ANGPT4	0.0828	0.0828	0.0828	0.01562	0.01562	0.01562		32054	rs2077972	A	0.07054	0.06098	0.0828	0.01562		32054	rs2077972	A	0.03511	0.04268	0.0828	0.01562		32054	rs2077972	A	0.06339	0.05091	0.0828	0.01562		32054	rs2077972	A	0.07534	0.03892	0.0828	0.01562		32054	rs2077972	A	0.06224	0.04472	0.0828
32094	1	102010406	102241610	LINC01709	-0.0416	-0.0221	-0.02924	0.01356	0.1889	0.110452		32094	rs1327583	T	0.3073	0.2919	-0.0275	0.1166		32094	rs1327583	T	0.2851	0.3018	-0.0275	0.1166		32094	rs1327583	T	0.2848	0.3232	-0.0275	0.1166		32094	rs965060	A	0.2431	0.3042	-0.0416	0.01356		32094	rs1327586	G	0.2679	0.3128	-0.0221
32189	4	72322773	72578718	SLC4A4	-0.0537	-0.0239	-0.03354	0.01469	0.2404	0.144108		32189	rs10031807	A	0.1366	0.158	-0.0537	0.01469		32189	rs4469035	T	0.1334	0.1768	-0.0276	0.18		32189	rs10009080	T	0.1845	0.1861	-0.0355	0.07545		32189	rs4130912	T	0.1712	0.1587	-0.027	0.21		32189	rs10805088	G	0.1921	0.1878	-0.0239
32358	7	3198742	3234248		-0.0372	-0.0361	-0.03654	0.01905	0.02767	0.024222		32358	rs12673364	G	0.3857	0.4013	-0.0372	0.01905		32358	rs12673364	G	0.3399	0.375	-0.0372	0.01905		32358	rs17133152	C	0.3654	0.4011	-0.0361	0.02767		32358	rs17133152	C	0.4178	0.4066	-0.0361	0.02767		32358	rs17133152	C	0.3727	0.3852	-0.0361
32523	20	57267135	57855032	ZNF831	-0.0381	-0.0314	-0.03454	0.02595	0.07501	0.047064		32523	rs2064864	A	0.3	0.3248	-0.0314	0.06353		32523	rs6123870	A	0.302	0.3567	-0.0381	0.02595		32523	rs2064865	C	0.2496	0.2836	-0.0319	0.07501		32523	rs6092765	C	0.3151	0.2814	-0.0373	0.03062		32523	rs154873	A	0.346	0.3441	-0.034
32697	12	2424249	2557099	CACNA1C,ENSG00000285734	0.0397	0.0471	0.04562	0.01386	0.04501	0.02009		32697	rs1076344	G	0.2411	0.2228	0.0471	0.01386		32697	rs1076344	G	0.236	0.1799	0.0471	0.01386		32697	rs1076344	G	0.213	0.2055	0.0471	0.01386		32697	rs1076344	G	0.2143	0.2091	0.0471	0.01386		32697	rs4765680	A	0.2255	0.2106	0.0397
33042	13	109102880	110284951	ENSG00000285534	0.0283	0.0472	0.04004	0.02153	0.1733	0.07016		33042	rs10161791	G	0.1777	0.1826	0.047	0.02153		33042	rs4773066	C	0.1713	0.128	0.0283	0.1733		33042	rs9583407	C	0.1988	0.1812	0.0472	0.02207		33042	rs9587939	A	0.1438	0.1566	0.0341	0.1015		33042	rs11617395	C	0.1714	0.1516	0.0436
33058	4	156720740	156940190		-0.064	-0.03	-0.0572	0.01404	0.2649	0.064212		33058	rs922134	A	0.1134	0.1308	-0.03	0.2649		33058	rs2878123	G	0.1193	0.108	-0.064	0.01404		33058	rs2878123	G	0.1435	0.1205	-0.064	0.01404		33058	rs2878123	G	0.09589	0.1235	-0.064	0.01404		33058	rs2878123	G	0.1042	0.1207	-0.064
33484	9	95387050	96359884	PHF2	-0.0391	-0.0283	-0.0349	0.01424	0.07207	0.036564		33484	rs10761239	C	0.4964	0.4773	-0.0289	0.07207		33484	rs10821166	A	0.4593	0.4726	-0.0283	0.06803		33484	rs10821164	T	0.4472	0.4612	-0.0391	0.01424		33484	rs10821164	T	0.4863	0.488	-0.0391	0.01424		33484	rs10821164	T	0.4509	0.4454	-0.0391
33758	16	74161426	75665019	GABARAPL2,ENSG00000259992	-0.041	-0.0346	-0.03972	0.01437	0.04558	0.020612		33758	rs6564267	G	0.3304	0.3293	-0.041	0.01437		33758	rs7189895	G	0.3132	0.3079	-0.0346	0.04558		33758	rs6564267	G	0.3253	0.3558	-0.041	0.01437		33758	rs6564267	G	0.3014	0.3273	-0.041	0.01437		33758	rs6564267	G	0.3335	0.3597	-0.041
33836	15	79974280	82187225	ENSG00000259692	-0.0458	-0.0458	-0.0458	0.01765	0.01765	0.01765		33836	rs12906746	G	0.2025	0.2212	-0.0458	0.01765		33836	rs12906746	G	0.1742	0.2256	-0.0458	0.01765		33836	rs12906746	G	0.2124	0.2233	-0.0458	0.01765		33836	rs12906746	G	0.2192	0.1647	-0.0458	0.01765		33836	rs12906746	G	0.2189	0.2013	-0.0458
33849	3	69699700	69802192		0.0385	0.0396	0.03938	0.01442	0.01786	0.015108		33849	rs6792167	A	0.3875	0.3714	0.0396	0.01442		33849	rs6792167	A	0.3764	0.375	0.0396	0.01442		33849	rs2872939	T	0.3913	0.3727	0.0385	0.01786		33849	rs6792167	A	0.3767	0.3593	0.0396	0.01442		33849	rs6792167	A	0.3962	0.3655	0.0396
33889	3	180890956	182476033	SOX2-OT	0.0483	0.0526	0.0502	0.01754	0.03212	0.02524		33889	rs2176612	A	0.1446	0.1286	0.0483	0.03212		33889	rs2718783	C	0.1419	0.1128	0.0526	0.01754		33889	rs2176612	A	0.1337	0.1188	0.0483	0.03212		33889	rs2718784	C	0.1918	0.1377	0.0517	0.01799		33889	rs2567664	G	0.151	0.1308	0.0501
33921	9	86631295	87441475	NTRK2	-0.0388	-0.0388	-0.0388	0.03531	0.03531	0.03531		33921	rs10512154	A	0.2205	0.235	-0.0388	0.03531		33921	rs10512154	A	0.2444	0.2195	-0.0388	0.03531		33921	rs10512154	A	0.2295	0.2451	-0.0388	0.03531		33921	rs10512154	A	0.1781	0.1946	-0.0388	0.03531		33921	rs10512154	A	0.2403	0.2133	-0.0388
33943	6	123788232	123847531	TRDN	0.0426	0.049	0.046	0.01964	0.04505	0.030884		33943	rs17689345	C	0.1812	0.1558	0.0479	0.02234		33943	rs17689345	C	0.1643	0.1433	0.0479	0.02234		33943	rs4571590	A	0.1661	0.1481	0.0426	0.04505		33943	rs4571590	A	0.1875	0.1168	0.0426	0.04505		33943	rs41324447	A	0.183	0.1529	0.049
33986	2	117616056	117912256		0.0308	0.036	0.03496	0.02811	0.06861	0.03621		33986	rs10192798	A	0.3079	0.3306	0.036	0.02811		33986	rs10192798	A	0.3408	0.3293	0.036	0.02811		33986	rs332925	C	0.3556	0.3145	0.0308	0.06861		33986	rs10192798	A	0.3904	0.3494	0.036	0.02811		33986	rs10192798	A	0.3512	0.3147	0.036
34088	7	148693142	149067575		0.0197	0.0277	0.02326	0.1346	0.2864	0.21798		34088	rs1525524	A	0.2312	0.2156	0.0197	0.2864		34088	rs1608849	G	0.2303	0.1616	0.0277	0.1346		34088	rs1525524	A	0.2201	0.2178	0.0197	0.2864		34088	rs1608849	G	0.1507	0.2066	0.0277	0.1346		34088	rs1525525	T	0.2056	0.219	0.0215
34485	5	174386631	174454025		0.0512	0.0512	0.0512	0.01833	0.01833	0.01833		34485	rs884252	C	0.1438	0.1591	0.0512	0.01833		34485	rs884252	C	0.1826	0.1159	0.0512	0.01833		34485	rs884252	C	0.1783	0.1533	0.0512	0.01833		34485	rs884252	C	0.1575	0.1347	0.0512	0.01833		34485	rs884252	C	0.1609	0.1281	0.0512
34639	17	58011066	60720362	MRC2	-0.0312	-0.0297	-0.0306	0.05106	0.06502	0.056644		34639	rs8078112	C	0.4054	0.4229	-0.0297	0.06502		34639	rs8078112	C	0.3947	0.4172	-0.0297	0.06502		34639	rs12451705	C	0.4207	0.4673	-0.0312	0.05106		34639	rs12451705	C	0.4521	0.4431	-0.0312	0.05106		34639	rs12451705	C	0.4748	0.4562	-0.0312
34729	21	41834843	42912973		-0.0392	-0.0392	-0.0392	0.01481	0.01481	0.01481		34729	rs2838053	G	0.4446	0.4157	-0.0392	0.01481		34729	rs2838053	G	0.431	0.4604	-0.0392	0.01481		34729	rs2838053	G	0.4127	0.4539	-0.0392	0.01481		34729	rs2838053	G	0.4795	0.3713	-0.0392	0.01481		34729	rs2838053	G	0.411	0.4602	-0.0392
34762	17	53149218	55794219		-0.0365	-0.0362	-0.03632	0.02732	0.03101	0.029534		34762	rs4793900	G	0.336	0.3556	-0.0365	0.02732		34762	rs4793900	G	0.3567	0.2866	-0.0365	0.02732		34762	rs4793902	C	0.3627	0.3685	-0.0362	0.03101		34762	rs4793902	C	0.3767	0.3653	-0.0362	0.03101		34762	rs4793902	C	0.336	0.3775	-0.0362
35085	6	39658651	39766629	KIF6	-0.0389	-0.0389	-0.0389	0.02141	0.02141	0.02141		35085	rs10947832	T	0.2973	0.3143	-0.0389	0.02141		35085	rs10947832	T	0.2887	0.3634	-0.0389	0.02141		35085	rs10947832	T	0.3173	0.3246	-0.0389	0.02141		35085	rs10947832	T	0.363	0.3223	-0.0389	0.02141		35085	rs10947832	T	0.3226	0.3375	-0.0389
35102	19	28688033	33389219		0.0255	0.0403	0.02868	0.01499	0.1107	0.091498		35102	rs2561253	A	0.3929	0.3514	0.0266	0.1104		35102	rs2607214	G	0.389	0.4238	0.0255	0.1107		35102	rs2607214	G	0.3859	0.3774	0.0255	0.1107		35102	rs2607214	G	0.2877	0.3862	0.0255	0.1107		35102	rs2561258	G	0.3812	0.3537	0.0403
35111	10	97022602	97032612	PDLIM1	-0.0405	-0.0405	-0.0405	0.04672	0.04672	0.04672		35111	rs12769370	C	0.1786	0.2012	-0.0405	0.04672		35111	rs12769370	C	0.198	0.2287	-0.0405	0.04672		35111	rs12769370	C	0.197	0.203	-0.0405	0.04672		35111	rs12769370	C	0.1438	0.1826	-0.0405	0.04672		35111	rs12769370	C	0.1826	0.2182	-0.0405
35124	3	143482873	144968679	SLC9A9	0.0374	0.039	0.03836	0.01611	0.02018	0.017738		35124	rs1349001	C	0.3721	0.3685	0.0374	0.02018		35124	rs1349001	C	0.3666	0.3537	0.0374	0.02018		35124	rs13080239	G	0.4251	0.3604	0.039	0.01611		35124	rs13080239	G	0.3836	0.3713	0.039	0.01611		35124	rs13080239	G	0.4109	0.3578	0.039
35227	18	12732809	12741370	LINC01882,ENSG00000266961	-0.0465	-0.0362	-0.0408	0.01505	0.06705	0.043012		35227	rs1893215	C	0.208	0.2378	-0.0465	0.01505		35227	rs1893215	C	0.2563	0.2622	-0.0465	0.01505		35227	rs2186940	C	0.2077	0.2109	-0.0386	0.05086		35227	rs2542181	G	0.1918	0.1826	-0.0362	0.06705		35227	rs2542181	G	0.1932	0.2156	-0.0362
35428	11	1000694	1040790		-0.0367	-0.0333	-0.03602	0.0219	0.03779	0.025324		35428	rs12296021	C	0.4339	0.4701	-0.0367	0.02313		35428	rs6597948	C	0.4775	0.4482	-0.0333	0.03779		35428	rs1128413	C	0.4348	0.4562	-0.0367	0.0219		35428	rs1128413	C	0.3819	0.4479	-0.0367	0.0219		35428	rs1128413	C	0.444	0.4702	-0.0367
35477	7	121845962	122071191	CADPS2,ENSG00000240499	-0.0358	-0.0322	-0.03364	0.03259	0.04541	0.040282		35477	rs11972946	C	0.3589	0.3518	-0.0358	0.03259		35477	rs11972946	C	0.3483	0.4146	-0.0358	0.03259		35477	rs3807874	A	0.3734	0.3876	-0.0322	0.04541		35477	rs3807874	A	0.3836	0.3443	-0.0322	0.04541		35477	rs3807874	A	0.3679	0.3962	-0.0322
35922	15	33226719	35431395	ENSG00000259336	0.0285	0.0414	0.03882	0.02112	0.1051	0.037916		35922	rs11073083	A	0.2679	0.2508	0.0414	0.02112		35922	rs11073083	A	0.2163	0.2439	0.0414	0.02112		35922	rs12909532	T	0.3004	0.2788	0.0285	0.1051		35922	rs11073083	A	0.226	0.3091	0.0414	0.02112		35922	rs11073083	A	0.2678	0.2315	0.0414
36186	6	160830889	160918295	LPAL2	0.0199	0.0492	0.04016	0.01552	0.2872	0.083688		36186	rs10945673	T	0.2134	0.1973	0.0492	0.01552		36186	rs10945673	T	0.191	0.1402	0.0492	0.01552		36186	rs10945673	T	0.1854	0.1885	0.0492	0.01552		36186	rs9355804	A	0.2466	0.2156	0.0333	0.08468		36186	rs7754014	T	0.2033	0.2224	0.0199
36191	11	68502904	68757913		-0.038	-0.0337	-0.0369	0.01617	0.02976	0.019676		36191	rs10896389	A	0.4562	0.4734	-0.0374	0.01617		36191	rs2846207	A	0.4466	0.4451	-0.0337	0.02976		36191	rs10896389	A	0.4314	0.4399	-0.0374	0.01617		36191	rs10896390	T	0.4589	0.491	-0.038	0.01814		36191	rs10896390	T	0.452	0.4848	-0.038
36265	3	170389631	171872472	SLC7A14-AS1,ENSG00000285218	0.0395	0.0529	0.04936	0.02003	0.06967	0.032486		36265	rs17842406	G	0.1464	0.1182	0.0516	0.02754		36265	rs9841319	A	0.09972	0.1311	0.0529	0.02003		36265	rs6444940	A	0.1373	0.1067	0.0517	0.02164		36265	rs9870546	C	0.1849	0.1287	0.0395	0.06967		36265	rs6444939	A	0.1269	0.1436	0.0511
36979	8	128694006	128775901	CASC11	0.0344	0.0373	0.03558	0.01777	0.0338	0.02738		36979	rs10110576	A	0.4759	0.4368	0.0371	0.01864		36979	rs4733664	T	0.4045	0.4604	0.0347	0.03289		36979	rs4733676	G	0.4519	0.4267	0.0344	0.0338		36979	rs4733676	G	0.4452	0.4251	0.0344	0.0338		36979	rs4733671	A	0.4474	0.4177	0.0373
37082	5	143459233	143482130		0.0564	0.0565	0.05646	0.04002	0.04139	0.040842		37082	rs10069436	T	0.08482	0.06929	0.0565	0.04139		37082	rs7717773	G	0.1096	0.07927	0.0564	0.04002		37082	rs7717773	G	0.08571	0.09576	0.0564	0.04002		37082	rs10069436	T	0.06164	0.07186	0.0565	0.04139		37082	rs10069436	T	0.08991	0.07335	0.0565
37094	3	56738268	56763619	ARHGEF3	0.0446	0.0479	0.04718	0.02505	0.04198	0.030626		37094	rs1009119	C	0.183	0.1386	0.0479	0.0287		37094	rs1009119	C	0.1362	0.128	0.0479	0.0287		37094	rs1009119	C	0.156	0.1442	0.0479	0.0287		37094	rs6765444	G	0.1507	0.1566	0.0446	0.04198		37094	rs1009118	G	0.154	0.1324	0.0476
37368	6	168771092	169034278	SMOC2	-0.0502	-0.0379	-0.04036	0.0174	0.07246	0.061448		37368	rs9455679	A	0.1571	0.1707	-0.0379	0.07246		37368	rs9455679	A	0.1138	0.1799	-0.0379	0.07246		37368	rs9455679	A	0.15	0.1661	-0.0379	0.07246		37368	rs9455679	A	0.137	0.1677	-0.0379	0.07246		37368	rs10081063	G	0.1466	0.1717	-0.0502
37429	10	68848215	69359021	CTNNA3	-0.0726	-0.056	-0.06472	0.08238	0.1571	0.114252		37429	rs10740277	A	0.03393	0.0449	-0.0612	0.1247		37429	rs10997747	G	0.04213	0.07012	-0.056	0.1571		37429	rs10740277	A	0.03565	0.03818	-0.0612	0.1247		37429	rs10762166	C	0.05556	0.04518	-0.0726	0.08238		37429	rs10762166	C	0.04492	0.0462	-0.0726
37808	7	136778930	137128390	DGKI	0.0251	0.0329	0.0277	0.04726	0.1276	0.094768		37808	rs10234672	C	0.3929	0.3675	0.0278	0.07994		37808	rs10488609	T	0.3694	0.3018	0.0251	0.1276		37808	rs10488609	T	0.3333	0.357	0.0251	0.1276		37808	rs1731913	C	0.3611	0.3623	0.0276	0.09144		37808	rs12535157	A	0.3282	0.3381	0.0329
37896	1	21027782	21239059	HP1BP3	-0.036	-0.0296	-0.03138	0.01997	0.06463	0.04966		37896	rs12123092	A	0.4509	0.4745	-0.0302	0.05067		37896	rs2305463	C	0.4143	0.436	-0.0315	0.0484		37896	rs2320590	C	0.442	0.4581	-0.0296	0.06463		37896	rs2320590	C	0.4726	0.4611	-0.0296	0.06463		37896	rs10916900	G	0.4148	0.4444	-0.036
37941	4	16303961	16726650	LDB2	0.055	0.0816	0.07064	0.01841	0.07853	0.044398		37941	rs16893797	T	0.06071	0.05322	0.0816	0.01841		37941	rs16893890	A	0.06461	0.05488	0.055	0.07853		37941	rs16893797	T	0.07665	0.05697	0.0816	0.01841		37941	rs16893890	A	0.07534	0.06627	0.055	0.07853		37941	rs1514643	A	0.06632	0.04659	0.08
38000	2	153479527	153771281		0.0025	0.0062	0.00398	0.7657	0.9023	0.84766		38000	rs1427396	T	0.1616	0.1746	0.0062	0.7657		38000	rs1427396	T	0.1952	0.1687	0.0062	0.7657		38000	rs1365840	G	0.1658	0.177	0.0025	0.9023		38000	rs1365840	G	0.1918	0.1497	0.0025	0.9023		38000	rs1365840	G	0.1732	0.1494	0.0025
38022	1	170388482	172121859	DNM3	0.0402	0.0448	0.04204	0.02408	0.04297	0.035414		38022	rs10911112	A	0.1795	0.1924	0.0448	0.02408		38022	rs10911112	A	0.2022	0.1341	0.0448	0.02408		38022	rs10797791	A	0.1747	0.1673	0.0402	0.04297		38022	rs10797791	A	0.1712	0.1916	0.0402	0.04297		38022	rs10797791	A	0.1864	0.1798	0.0402
38027	4	173996293	174284793		0.0387	0.0532	0.04476	0.01643	0.07682	0.049768		38027	rs11725123	A	0.1386	0.1469	0.0532	0.01643		38027	rs13138296	C	0.139	0.09756	0.0387	0.07682		38027	rs13138296	C	0.1729	0.1479	0.0387	0.07682		38027	rs11725123	A	0.137	0.1407	0.0532	0.01643		38027	rs10012945	C	0.147	0.1297	0.04
38247	6	34249546	34407210	RPS10-NUDT3,NUDT3	-0.0427	-0.0401	-0.04166	0.07639	0.09208	0.08292		38247	rs16883896	A	0.09643	0.1159	-0.0412	0.08458		38247	rs3798557	G	0.1039	0.1006	-0.0421	0.08268		38247	rs1057691	G	0.1257	0.1291	-0.0422	0.07639		38247	rs16883137	A	0.1712	0.1227	-0.0401	0.09208		38247	rs10484268	C	0.1071	0.1306	-0.0427
38410	10	4147015	4157015		-0.0679	-0.0592	-0.06268	0.01662	0.04663	0.034626		38410	rs11252350	A	0.06518	0.08647	-0.0592	0.04663		38410	rs10904191	T	0.08427	0.08232	-0.0679	0.01662		38410	rs10904191	T	0.0918	0.09709	-0.0679	0.01662		38410	rs11252350	A	0.06164	0.05689	-0.0592	0.04663		38410	rs11252350	A	0.07611	0.0914	-0.0592
38425	3	151053898	152558364	MED12L	0.0335	0.0373	0.03648	0.02066	0.03723	0.024166		38425	rs7644001	G	0.3728	0.3419	0.0372	0.02066		38425	rs7644001	G	0.3652	0.3415	0.0372	0.02066		38425	rs6790448	G	0.3964	0.3489	0.0335	0.03723		38425	rs7644001	G	0.3562	0.3772	0.0372	0.02066		38425	rs3732759	G	0.3693	0.3397	0.0373
38436	13	56968400	58070399		-0.0257	-0.0249	-0.02506	0.09665	0.1167	0.11269		38436	rs9527666	T	0.4651	0.4784	-0.0249	0.1167		38436	rs9527666	T	0.4831	0.4543	-0.0249	0.1167		38436	rs9527666	T	0.4911	0.4964	-0.0249	0.1167		38436	rs9527666	T	0.4795	0.4819	-0.0249	0.1167		38436	rs17571019	T	0.4568	0.4901	-0.0257
38555	7	80457543	80619607		-0.0497	-0.0493	-0.04954	0.01888	0.01912	0.019024		38555	rs701325	A	0.2009	0.1663	-0.0497	0.01912		38555	rs853050	C	0.1643	0.2104	-0.0493	0.01888		38555	rs853050	C	0.1631	0.1954	-0.0493	0.01888		38555	rs701325	A	0.1781	0.1467	-0.0497	0.01912		38555	rs701325	A	0.176	0.1844	-0.0497
38665	1	154530564	156300082	GLMP	0.0289	0.0332	0.03066	0.05244	0.1023	0.078408		38665	rs10908494	G	0.2946	0.2993	0.0305	0.07326		38665	rs10908502	G	0.2697	0.2988	0.0332	0.05244		38665	rs10908495	C	0.3202	0.2739	0.0289	0.1023		38665	rs11264467	T	0.3082	0.2713	0.0289	0.1003		38665	rs10908500	T	0.2937	0.2473	0.0318
38840	3	116868163	118350853		0.0341	0.0341	0.0341	0.02587	0.02587	0.02587		38840	rs4145154	A	0.4758	0.4589	0.0341	0.02587		38840	rs4145154	A	0.4705	0.4848	0.0341	0.02587		38840	rs4145154	A	0.4938	0.4714	0.0341	0.02587		38840	rs4145154	A	0.4932	0.4731	0.0341	0.02587		38840	rs4145154	A	0.4889	0.4578	0.0341
38863	3	30534500	30559496		0.0416	0.0416	0.0416	0.01684	0.01684	0.01684		38863	rs4305453	C	0.3211	0.2891	0.0416	0.01684		38863	rs4305453	C	0.3104	0.2835	0.0416	0.01684		38863	rs4305453	C	0.3271	0.2973	0.0416	0.01684		38863	rs4305453	C	0.2808	0.2725	0.0416	0.01684		38863	rs4305453	C	0.3117	0.3035	0.0416
38896	9	9952381	9962381	PTPRD	-0.0425	-0.0398	-0.04034	0.01685	0.02041	0.019698		38896	rs10978137	T	0.2487	0.2633	-0.0425	0.01685		38896	rs7470838	G	0.2753	0.2683	-0.0398	0.02041		38896	rs7470838	G	0.2567	0.2989	-0.0398	0.02041		38896	rs7470838	G	0.1712	0.2066	-0.0398	0.02041		38896	rs7470838	G	0.2577	0.2901	-0.0398
38994	19	50412417	55110547	IL4I1,NUP62	0.0408	0.0425	0.04148	0.02265	0.02797	0.025842		38994	rs999583	G	0.258	0.2639	0.0425	0.02265		38994	rs999583	G	0.2598	0.2226	0.0425	0.02265		38994	rs1290743	G	0.2504	0.2139	0.0408	0.02797		38994	rs1290743	G	0.3082	0.2349	0.0408	0.02797		38994	rs1290743	G	0.2592	0.2175	0.0408
39101	16	82222770	83665269	CDH13	0.0399	0.043	0.04146	0.01731	0.03291	0.024638		39101	rs722938	T	0.2339	0.2151	0.0399	0.03291		39101	rs722938	T	0.2711	0.247	0.0399	0.03291		39101	rs12449206	G	0.2683	0.2269	0.043	0.01731		39101	rs12449206	G	0.2534	0.2305	0.043	0.01731		39101	rs12449138	C	0.2487	0.2415	0.0415
39129	1	108157301	108356000	VAV3	0.038	0.0407	0.03908	0.01696	0.03129	0.025558		39129	rs17485868	A	0.2875	0.2836	0.0407	0.01696		39129	rs17485868	A	0.3034	0.247	0.0407	0.01696		39129	rs10494078	T	0.3128	0.2812	0.038	0.03129		39129	rs10494078	T	0.363	0.2964	0.038	0.03129		39129	rs10494078	T	0.2982	0.2841	0.038
39165	7	137965005	138314465	SVOPL	0.0787	0.0787	0.0787	0.02964	0.02964	0.02964		39165	rs1659809	T	0.05893	0.04823	0.0787	0.02964		39165	rs1659809	T	0.05197	0.05793	0.0787	0.02964		39165	rs1659809	T	0.05971	0.04545	0.0787	0.02964		39165	rs1659809	T	0.04795	0.06627	0.0787	0.02964		39165	rs1659809	T	0.04149	0.05455	0.0787
39172	17	7079962	7150552	CTDNEP1,ENSG00000262302	0.0302	0.0373	0.03362	0.01697	0.05662	0.037626		39172	rs2074217	A	0.3795	0.3841	0.0327	0.04105		39172	rs507506	A	0.4254	0.3598	0.0306	0.05662		39172	rs222851	A	0.3841	0.3859	0.0302	0.05652		39172	rs222852	G	0.411	0.4482	0.0373	0.01697		39172	rs222852	G	0.442	0.3924	0.0373
39227	4	178022268	178311601	ENSG00000287544	0.0328	0.0354	0.03484	0.06648	0.08871	0.071532		39227	rs4299533	T	0.2663	0.2232	0.0354	0.06648		39227	rs4299533	T	0.2289	0.2744	0.0354	0.06648		39227	rs17666618	C	0.2607	0.2291	0.0328	0.08871		39227	rs4299533	T	0.3151	0.2275	0.0354	0.06648		39227	rs17721806	C	0.2339	0.2522	0.0352
39261	7	155322736	155629975		0.0438	0.0438	0.0438	0.02491	0.02491	0.02491		39261	rs1151790	C	0.2821	0.255	0.0438	0.02491		39261	rs1151790	C	0.2261	0.25	0.0438	0.02491		39261	rs1151790	C	0.2291	0.2576	0.0438	0.02491		39261	rs1151790	C	0.2329	0.2365	0.0438	0.02491		39261	rs1151790	C	0.2574	0.2679	0.0438
39518	11	17515837	17562113	USH1C	-0.0389	-0.0279	-0.0323	0.01713	0.09535	0.064062		39518	rs10741729	A	0.3527	0.3847	-0.0279	0.09535		39518	rs2237956	A	0.3301	0.3994	-0.0389	0.01713		39518	rs2237956	A	0.3574	0.337	-0.0389	0.01713		39518	rs10741729	A	0.3542	0.3713	-0.0279	0.09535		39518	rs10741729	A	0.3697	0.3923	-0.0279
39571	13	67225767	68339227	ENSG00000287876	0.0661	0.0692	0.06672	0.01857	0.02015	0.019834		39571	rs2786266	G	0.07589	0.085	0.0661	0.02015		39571	rs2786266	G	0.08146	0.07927	0.0661	0.02015		39571	rs2786266	G	0.08467	0.06727	0.0661	0.02015		39571	rs2786266	G	0.08219	0.07879	0.0661	0.02015		39571	rs1023329	C	0.07603	0.07361	0.0692
39581	5	36599385	36635142	SLC1A3	-0.0384	-0.0384	-0.0384	0.01716	0.01716	0.01716		39581	rs2562573	T	0.4884	0.4939	-0.0384	0.01716		39581	rs2562573	T	0.4677	0.4756	-0.0384	0.01716		39581	rs2562573	T	0.4857	0.4612	-0.0384	0.01716		39581	rs2562573	T	0.5	0.494	-0.0384	0.01716		39581	rs2562573	T	0.4732	0.4973	-0.0384
39718	19	39789115	44484300		-0.0638	-0.0489	-0.05606	0.01773	0.05445	0.037722		39718	rs194014	A	0.08571	0.1142	-0.0519	0.04935		39718	rs30461	G	0.1222	0.1463	-0.0489	0.05445		39718	rs194014	A	0.09091	0.1015	-0.0519	0.04935		39718	rs39587	G	0.09589	0.1121	-0.0638	0.01773		39718	rs39587	G	0.09345	0.1162	-0.0638
39907	13	43415689	44517689	NRAD1,ENSG00000281883	0.0356	0.0394	0.03712	0.03131	0.05809	0.047378		39907	rs1337201	C	0.2402	0.2128	0.0394	0.03131		39907	rs687582	C	0.2317	0.2195	0.0356	0.05809		39907	rs1337201	C	0.2254	0.2153	0.0394	0.03131		39907	rs687582	C	0.2192	0.2006	0.0356	0.05809		39907	rs687582	C	0.2445	0.1975	0.0356
40038	10	125516679	125526689	CPXM2	-0.0452	-0.0452	-0.0452	0.01739	0.01739	0.01739		40038	rs1896392	G	0.2182	0.2129	-0.0452	0.01739		40038	rs1896392	G	0.1924	0.2439	-0.0452	0.01739		40038	rs1896392	G	0.1845	0.2206	-0.0452	0.01739		40038	rs1896392	G	0.1438	0.1916	-0.0452	0.01739		40038	rs1896392	G	0.1986	0.2074	-0.0452
40138	2	55971550	56118046	EFEMP1	0.0353	0.0353	0.0353	0.03233	0.03233	0.03233		40138	rs10865291	A	0.3464	0.3431	0.0353	0.03233		40138	rs10865291	A	0.3831	0.316	0.0353	0.03233		40138	rs10865291	A	0.3703	0.3315	0.0353	0.03233		40138	rs10865291	A	0.363	0.2874	0.0353	0.03233		40138	rs10865291	A	0.3689	0.3253	0.0353
40193	7	67196489	67559054	ENSG00000236531	-0.0307	-0.0307	-0.0307	0.05695	0.05695	0.05695		40193	rs2019539	T	0.4241	0.4156	-0.0307	0.05695		40193	rs2019539	T	0.4059	0.4116	-0.0307	0.05695		40193	rs2019539	T	0.3708	0.417	-0.0307	0.05695		40193	rs2019539	T	0.3699	0.4012	-0.0307	0.05695		40193	rs2019539	T	0.432	0.4695	-0.0307
40312	12	123230568	124667587	RFLNA	0.0287	0.0355	0.0339	0.02114	0.06325	0.030108		40312	rs10846621	C	0.4821	0.4839	0.0287	0.06325		40312	rs11057479	A	0.4424	0.436	0.0351	0.02205		40312	rs11057479	A	0.4314	0.46	0.0351	0.02205		40312	rs11057479	A	0.4178	0.4581	0.0351	0.02205		40312	rs10846617	C	0.437	0.3978	0.0355
40462	6	95003654	95064745		-0.0417	-0.0375	-0.0402	0.03123	0.0524	0.041742		40462	rs371345	G	0.2165	0.1987	-0.0375	0.0524		40462	rs436889	C	0.1573	0.2104	-0.0401	0.03923		40462	rs417343	T	0.1747	0.2	-0.0404	0.04614		40462	rs442124	C	0.2397	0.1747	-0.0413	0.03971		40462	rs402892	G	0.1803	0.188	-0.0417
40843	2	45257673	45404169	LINC01121,ENSG00000286728	0.0379	0.0379	0.0379	0.03634	0.03634	0.03634		40843	rs10209754	C	0.3098	0.2966	0.0379	0.03634		40843	rs10209754	C	0.3174	0.3079	0.0379	0.03634		40843	rs10209754	C	0.3196	0.284	0.0379	0.03634		40843	rs10209754	C	0.3151	0.3061	0.0379	0.03634		40843	rs10209754	C	0.3152	0.2656	0.0379
41163	15	47007067	49219952	SHC4	-0.0421	-0.0342	-0.0371	0.01841	0.06016	0.044004		41163	rs10519199	G	0.2437	0.2633	-0.0342	0.06016		41163	rs10519199	G	0.2739	0.2226	-0.0342	0.06016		41163	rs10519199	G	0.2398	0.2739	-0.0342	0.06016		41163	rs4774529	A	0.2945	0.2455	-0.0421	0.01841		41163	rs4303430	T	0.2584	0.2549	-0.0408
41185	2	150522635	150814389	MMADHC-DT	0.0242	0.0408	0.03086	0.018	0.1595	0.09972		41185	rs2218027	T	0.333	0.3226	0.0408	0.018		41185	rs2218027	T	0.323	0.2652	0.0408	0.018		41185	rs1437950	C	0.3494	0.3109	0.0242	0.1595		41185	rs1437950	C	0.2945	0.3144	0.0242	0.1595		41185	rs1437934	A	0.3542	0.3384	0.0243
41335	18	20196461	21942463	OSBPL1A	0.0384	0.039	0.03864	0.05362	0.06257	0.05899		41335	rs7241075	T	0.2054	0.1574	0.039	0.05362		41335	rs7241075	T	0.1924	0.2073	0.039	0.05362		41335	rs1421116	A	0.1978	0.1557	0.0384	0.06257		41335	rs1421116	A	0.1712	0.1796	0.0384	0.06257		41335	rs1421116	A	0.1704	0.1649	0.0384
41367	8	119229133	119294948	SAMD12	-0.0368	-0.0358	-0.036	0.02168	0.03062	0.028832		41367	rs10808496	G	0.367	0.3958	-0.0358	0.03062		41367	rs10808496	G	0.368	0.4207	-0.0358	0.03062		41367	rs13253524	A	0.3589	0.3774	-0.0368	0.02168		41367	rs10808496	G	0.3562	0.3623	-0.0358	0.03062		41367	rs10808496	G	0.3742	0.4031	-0.0358
41412	13	40879279	41981279		-0.0495	-0.0441	-0.04518	0.01897	0.03279	0.030026		41412	rs9594537	A	0.1622	0.1657	-0.0441	0.03279		41412	rs9594537	A	0.1306	0.189	-0.0441	0.03279		41412	rs9594537	A	0.1346	0.1776	-0.0441	0.03279		41412	rs9594537	A	0.1918	0.1497	-0.0441	0.03279		41412	rs7329676	T	0.1496	0.1538	-0.0495
41446	3	140152821	141638165	CLSTN2	0.0246	0.0286	0.02668	0.06794	0.1199	0.09304		41446	rs347339	T	0.4375	0.4629	0.0278	0.07873		41446	rs347341	C	0.4846	0.454	0.0246	0.1199		41446	rs347339	T	0.4759	0.4521	0.0278	0.07873		41446	rs347341	C	0.4041	0.479	0.0246	0.1199		41446	rs347338	T	0.4752	0.4365	0.0286
41555	14	55835499	56771207	ENSG00000259483	-0.0379	-0.0359	-0.0375	0.01818	0.022	0.018944		41555	rs1152472	T	0.3801	0.4123	-0.0379	0.01818		41555	rs1152472	T	0.3933	0.4665	-0.0379	0.01818		41555	rs1152467	A	0.4087	0.4307	-0.0359	0.022		41555	rs1152472	T	0.4041	0.4371	-0.0379	0.01818		41555	rs1152472	T	0.4175	0.4283	-0.0379
41834	5	165362176	165429598		-0.0405	-0.0394	-0.03984	0.07894	0.0832	0.081496		41834	rs3812010	C	0.1509	0.1558	-0.0394	0.0832		41834	rs3812010	C	0.1275	0.1768	-0.0394	0.0832		41834	rs3812010	C	0.1214	0.1721	-0.0394	0.0832		41834	rs7733351	C	0.1507	0.1437	-0.0405	0.07894		41834	rs7733351	C	0.1624	0.1553	-0.0405
42292	12	126524562	127967297		-0.0261	-0.0173	-0.02106	0.1067	0.3172	0.22198		42292	rs10773402	C	0.3515	0.3819	-0.0173	0.3172		42292	rs10773402	C	0.3612	0.3957	-0.0173	0.3172		42292	rs1463752	T	0.3966	0.3998	-0.0261	0.1067		42292	rs1463752	T	0.3786	0.3584	-0.0261	0.1067		42292	rs10847371	A	0.362	0.3959	-0.0185
42628	3	127593759	129076449	MGLL	0.0508	0.052	0.05152	0.02429	0.02545	0.024754		42628	rs11926127	G	0.1429	0.1244	0.0508	0.02545		42628	rs11926127	G	0.1517	0.1189	0.0508	0.02545		42628	rs11921463	G	0.1444	0.1297	0.052	0.02429		42628	rs11921463	G	0.137	0.1355	0.052	0.02429		42628	rs11921463	G	0.1532	0.1279	0.052
43097	5	94321178	94346934	MCTP1	-0.0489	-0.0489	-0.0489	0.01891	0.01891	0.01891		43097	rs169822	A	0.1455	0.1591	-0.0489	0.01891		43097	rs169822	A	0.1376	0.1963	-0.0489	0.01891		43097	rs169822	A	0.1711	0.1648	-0.0489	0.01891		43097	rs169822	A	0.2329	0.1796	-0.0489	0.01891		43097	rs169822	A	0.1624	0.1811	-0.0489
43198	9	9199799	9247105	PTPRD	-0.0475	-0.0423	-0.04424	0.02676	0.06208	0.04488		43198	rs10977596	G	0.1367	0.1606	-0.0466	0.03226		43198	rs4621866	C	0.1756	0.1372	-0.0425	0.06208		43198	rs10977579	C	0.1337	0.145	-0.0475	0.02676		43198	rs10977614	A	0.1438	0.1138	-0.0423	0.05165		43198	rs10977614	A	0.1261	0.1538	-0.0423
43795	8	119873213	119956070	SAMD12-AS1	-0.0579	-0.0542	-0.05584	0.03385	0.04913	0.042096		43795	rs16891617	C	0.08393	0.09701	-0.0557	0.0425		43795	rs7829526	C	0.07163	0.08841	-0.0542	0.04913		43795	rs16891617	C	0.09447	0.103	-0.0557	0.0425		43795	rs16891617	C	0.05479	0.07273	-0.0557	0.0425		43795	rs16891598	G	0.0836	0.1075	-0.0579
43940	11	5652319	5695743	TRIM5,ENSG00000239920	0.0474	0.0474	0.0474	0.03685	0.03685	0.03685		43940	rs10838517	T	0.1446	0.1486	0.0474	0.03685		43940	rs10838517	T	0.1742	0.128	0.0474	0.03685		43940	rs10838517	T	0.1631	0.1394	0.0474	0.03685		43940	rs10838517	T	0.1042	0.1257	0.0474	0.03685		43940	rs10838517	T	0.1453	0.1667	0.0474
44206	7	121751585	121964349	CADPS2	-0.0325	-0.0325	-0.0325	0.04518	0.04518	0.04518		44206	rs1899689	T	0.4071	0.429	-0.0325	0.04518		44206	rs1899689	T	0.3848	0.3872	-0.0325	0.04518		44206	rs1899689	T	0.3894	0.427	-0.0325	0.04518		44206	rs1899689	T	0.4041	0.3982	-0.0325	0.04518		44206	rs1899689	T	0.3982	0.388	-0.0325
44241	2	72191711	72348725		0.0346	0.0404	0.03908	0.02554	0.05169	0.031952		44241	rs6546741	T	0.2536	0.2417	0.0396	0.03145		44241	rs6716351	T	0.2809	0.3006	0.0346	0.05169		44241	rs10209307	C	0.2692	0.2382	0.0404	0.02554		44241	rs10209307	C	0.2192	0.2545	0.0404	0.02554		44241	rs10209307	C	0.2671	0.237	0.0404
44322	11	74424279	74746631		-0.0335	-0.0257	-0.03072	0.04785	0.1352	0.08043		44322	rs10899060	A	0.2696	0.3065	-0.0335	0.04785		44322	rs2298746	T	0.2626	0.2591	-0.0274	0.1234		44322	rs10899060	A	0.287	0.2921	-0.0335	0.04785		44322	rs10899060	A	0.3264	0.2892	-0.0335	0.04785		44322	rs2304683	A	0.2783	0.3076	-0.0257
44626	2	140933714	141194627	LRP1B	0.0391	0.0442	0.04318	0.0197	0.03384	0.022528		44626	rs17387292	C	0.225	0.199	0.0442	0.0197		44626	rs17387292	C	0.2472	0.189	0.0442	0.0197		44626	rs1518440	G	0.2469	0.2091	0.0391	0.03384		44626	rs17387292	C	0.2808	0.1976	0.0442	0.0197		44626	rs17387292	C	0.2387	0.2271	0.0442
44631	9	121033329	121993919	BRINP1	0.0354	0.0374	0.03682	0.0197	0.02264	0.020852		44631	rs10818289	C	0.4509	0.434	0.0371	0.02064		44631	rs990029	A	0.4199	0.4451	0.0354	0.02264		44631	rs10818289	C	0.4679	0.409	0.0371	0.02064		44631	rs10818289	C	0.4041	0.4307	0.0371	0.02064		44631	rs10760029	A	0.4474	0.4392	0.0374
44698	7	111312195	111531648	DOCK4	-0.0207	-0.018	-0.01882	0.2096	0.2844	0.263		44698	rs6466389	C	0.3857	0.3792	-0.018	0.2844		44698	rs757036	A	0.3904	0.4238	-0.0207	0.2096		44698	rs6466389	C	0.3538	0.3841	-0.018	0.2844		44698	rs6466389	C	0.3904	0.3645	-0.018	0.2844		44698	rs10228638	C	0.3954	0.4243	-0.0194
44810	10	8696446	8741225		-0.0384	-0.0305	-0.03366	0.02057	0.06367	0.04643		44810	rs10795668	A	0.3152	0.3376	-0.0384	0.02057		44810	rs706771	A	0.3076	0.3628	-0.0305	0.06367		44810	rs10795668	A	0.3378	0.3255	-0.0384	0.02057		44810	rs706771	A	0.2466	0.3323	-0.0305	0.06367		44810	rs706771	A	0.3165	0.3491	-0.0305
44874	2	115906019	116174484	DPP10	0.0501	0.0633	0.05756	0.02566	0.06534	0.048678		44874	rs17355616	C	0.08214	0.06929	0.0588	0.04508		44874	rs843393	A	0.0941	0.09146	0.0501	0.06484		44874	rs1717054	T	0.09715	0.08667	0.0624	0.02566		44874	rs34796827	A	0.1233	0.08982	0.0532	0.06534		44874	rs1516313	T	0.07466	0.05546	0.0633
45196	17	27263811	30314504	SUZ12	-0.0478	-0.0386	-0.04322	0.02753	0.07729	0.056602		45196	rs2470243	T	0.1411	0.1563	-0.0428	0.07472		45196	rs7210970	A	0.1525	0.1688	-0.0386	0.07251		45196	rs2028067	C	0.156	0.1703	-0.0472	0.03096		45196	rs501957	A	0.1319	0.1606	-0.0478	0.02753		45196	rs2344312	A	0.1292	0.1618	-0.0397
45206	11	119660546	120161886	POU2F3	-0.0458	-0.0402	-0.04216	0.01999	0.04821	0.038606		45206	rs10790373	T	0.1866	0.2048	-0.0458	0.01999		45206	rs11217793	T	0.2137	0.1855	-0.0402	0.04821		45206	rs4936512	C	0.1907	0.2139	-0.0444	0.02841		45206	rs11217793	T	0.226	0.2036	-0.0402	0.04821		45206	rs11217793	T	0.17	0.2057	-0.0402
45340	18	57374734	59229664		0.0499	0.0693	0.05378	0.02006	0.09427	0.079428		45340	rs17068541	C	0.08929	0.0765	0.0499	0.09427		45340	rs117883203	A	0.0941	0.05488	0.0693	0.02006		45340	rs17068541	C	0.09091	0.07697	0.0499	0.09427		45340	rs17068541	C	0.08219	0.07784	0.0499	0.09427		45340	rs17068541	C	0.08122	0.08244	0.0499
45439	16	82339803	83782302	CDH13,ENSG00000260788	0.0391	0.0391	0.0391	0.02011	0.02011	0.02011		45439	rs173839	C	0.3036	0.3437	0.0391	0.02011		45439	rs173839	C	0.3343	0.2774	0.0391	0.02011		45439	rs173839	C	0.3378	0.3206	0.0391	0.02011		45439	rs173839	C	0.3425	0.3234	0.0391	0.02011		45439	rs173839	C	0.3388	0.3089	0.0391
45834	11	84276593	84605753	DLG2	-0.0552	-0.054	-0.05496	0.0805	0.08356	0.081112		45834	rs10501579	G	0.06339	0.07373	-0.0552	0.0805		45834	rs17147761	A	0.07163	0.05521	-0.054	0.08356		45834	rs10501579	G	0.05437	0.08061	-0.0552	0.0805		45834	rs10501579	G	0.09589	0.03614	-0.0552	0.0805		45834	rs10501579	G	0.06322	0.06977	-0.0552
45911	12	110317972	111833589	LINC02356	0.0363	0.038	0.03698	0.04706	0.05283	0.050522		45911	rs11065884	G	0.2286	0.1996	0.038	0.04706		45911	rs11065884	G	0.2065	0.1585	0.038	0.04706		45911	rs10774623	G	0.2193	0.2212	0.0363	0.05283		45911	rs10774623	G	0.3014	0.197	0.0363	0.05283		45911	rs10774623	G	0.2124	0.2097	0.0363
46073	11	130608297	131103087		-0.048	-0.048	-0.048	0.02041	0.02041	0.02041		46073	rs7129945	C	0.2259	0.2561	-0.048	0.02041		46073	rs7129945	C	0.2303	0.2927	-0.048	0.02041		46073	rs7129945	C	0.2228	0.2303	-0.048	0.02041		46073	rs7129945	C	0.2329	0.2186	-0.048	0.02041		46073	rs7129945	C	0.2047	0.2361	-0.048
46369	5	74301633	74337389	GCNT4	0.0649	0.0671	0.06666	0.02055	0.03632	0.023704		46369	rs12657184	A	0.07321	0.06541	0.0649	0.03632		46369	rs12651778	A	0.08146	0.06402	0.0671	0.02055		46369	rs12651778	A	0.09002	0.0703	0.0671	0.02055		46369	rs12651778	A	0.1027	0.1024	0.0671	0.02055		46369	rs12651778	A	0.08288	0.05974	0.0671
46371	5	82973566	83016205	HAPLN1	0.068	0.0681	0.06808	0.02055	0.03107	0.022654		46371	rs7735782	A	0.09286	0.07095	0.0681	0.02055		46371	rs7735782	A	0.06742	0.09146	0.0681	0.02055		46371	rs7735782	A	0.06774	0.07333	0.0681	0.02055		46371	rs7735782	A	0.04795	0.05689	0.0681	0.02055		46371	rs13179161	G	0.07956	0.06351	0.068
46485	16	55589312	57032283	NLRC5	-0.0791	-0.0756	-0.0784	0.0399	0.05273	0.042466		46485	rs17310296	C	0.04741	0.05377	-0.0756	0.05273		46485	rs17369578	A	0.02107	0.05183	-0.0791	0.0399		46485	rs17369578	A	0.05437	0.0497	-0.0791	0.0399		46485	rs17369578	A	0.0411	0.04491	-0.0791	0.0399		46485	rs17369578	A	0.03647	0.05645	-0.0791
46782	5	178343144	178410538	GRM6,ENSG00000254035	-0.0741	-0.0741	-0.0741	0.02127	0.02127	0.02127		46782	rs1475950	C	0.05	0.07373	-0.0741	0.02127		46782	rs1475950	C	0.05197	0.05183	-0.0741	0.02127		46782	rs1475950	C	0.05526	0.06788	-0.0741	0.02127		46782	rs1475950	C	0.07534	0.09036	-0.0741	0.02127		46782	rs1475950	C	0.0545	0.07284	-0.0741
47027	1	199297930	201031307	CACNA1S	0.0287	0.0358	0.0325	0.0209	0.06817	0.044206		47027	rs2297903	C	0.4973	0.4856	0.0358	0.0209		47027	rs3767503	A	0.4621	0.3841	0.0287	0.06817		47027	rs2297903	C	0.4715	0.4873	0.0358	0.0209		47027	rs4915475	C	0.3493	0.497	0.0311	0.05553		47027	rs4915475	C	0.4863	0.4544	0.0311
47488	17	72222167	74710572	MXRA7	-0.0345	-0.0264	-0.02922	0.02668	0.1023	0.075424		47488	rs1476788	A	0.4982	0.4911	-0.0345	0.02668		47488	rs7211963	T	0.4747	0.4604	-0.0324	0.04354		47488	rs2240774	C	0.4715	0.4721	-0.0264	0.1023		47488	rs2240774	C	0.4366	0.4485	-0.0264	0.1023		47488	rs2240774	C	0.4797	0.4801	-0.0264
47658	1	199677208	201422201		0.0348	0.0352	0.03488	0.02607	0.0319	0.030734		47658	rs10920205	G	0.3741	0.3769	0.0348	0.0319		47658	rs10920205	G	0.3618	0.362	0.0348	0.0319		47658	rs12408988	A	0.4278	0.3594	0.0352	0.02607		47658	rs10920205	G	0.3082	0.3982	0.0348	0.0319		47658	rs10920205	G	0.3817	0.347	0.0348
47716	1	103930141	104128618	ENSG00000224613	-0.0357	-0.0306	-0.03306	0.03202	0.05819	0.045948		47716	rs10158225	T	0.3417	0.3681	-0.0342	0.04067		47716	rs6661612	G	0.3581	0.3872	-0.0306	0.05819		47716	rs6661612	G	0.3458	0.3782	-0.0306	0.05819		47716	rs10158225	T	0.3662	0.3952	-0.0342	0.04067		47716	rs7529144	G	0.3526	0.3641	-0.0357
47773	21	14811424	15889553	SAMSN1	0.0227	0.0272	0.02496	0.09153	0.171	0.128586		47773	rs2049858	T	0.3848	0.3635	0.0227	0.171		47773	rs2049858	T	0.3483	0.4238	0.0227	0.171		47773	rs1028271	A	0.3643	0.3218	0.0261	0.1047		47773	rs1028271	A	0.2877	0.3204	0.0261	0.1047		47773	rs1028270	G	0.3573	0.3361	0.0272
47840	6	36006220	36129239	MAPK14	0.0473	0.0521	0.04872	0.02615	0.03603	0.032436		47840	rs2815806	G	0.1321	0.1336	0.0488	0.03144		47840	rs851023	G	0.1685	0.1098	0.0477	0.03428		47840	rs707994	A	0.1536	0.1315	0.0473	0.03603		47840	rs851023	G	0.1438	0.1587	0.0477	0.03428		47840	rs2815809	T	0.1431	0.1513	0.0521
48102	3	32572589	32599218	DYNC1LI1	-0.0528	-0.0493	-0.0514	0.03939	0.05457	0.045462		48102	rs11914299	A	0.09286	0.1075	-0.0528	0.03939		48102	rs9825747	G	0.1025	0.1098	-0.0493	0.05457		48102	rs9825747	G	0.1025	0.1073	-0.0493	0.05457		48102	rs11914299	A	0.1233	0.1024	-0.0528	0.03939		48102	rs11914299	A	0.1024	0.1279	-0.0528
48155	7	82946973	83109037	SEMA3E	0.0233	0.0233	0.0233	0.1411	0.1411	0.1411		48155	rs10270844	T	0.4488	0.4294	0.0233	0.1411		48155	rs10270844	T	0.486	0.4207	0.0233	0.1411		48155	rs10270844	T	0.4804	0.4752	0.0233	0.1411		48155	rs10270844	T	0.3836	0.4641	0.0233	0.1411		48155	rs10270844	T	0.4668	0.4704	0.0233
48431	12	5110030	5241721		0.0369	0.0387	0.03754	0.02249	0.02488	0.023498		48431	rs494162	G	0.392	0.3736	0.0376	0.02249		48431	rs494162	G	0.3511	0.3811	0.0376	0.02249		48431	rs611652	T	0.4029	0.3636	0.0387	0.02275		48431	rs550011	G	0.3836	0.4127	0.0369	0.02488		48431	rs550011	G	0.3549	0.364	0.0369
48684	17	27338548	30380381	LRRC37B	-0.0389	-0.0279	-0.03108	0.08282	0.317	0.252464		48684	rs17182434	G	0.1393	0.153	-0.0328	0.2285		48684	rs8066156	C	0.1315	0.1497	-0.0279	0.317		48684	rs501773	G	0.1483	0.1597	-0.0389	0.08282		48684	rs8066156	C	0.1301	0.1595	-0.0279	0.317		48684	rs8066156	C	0.1305	0.1634	-0.0279
48897	2	132850077	133147782		-0.008	-0.0072	-0.00752	0.7044	0.7345	0.72246		48897	rs13027234	T	0.1795	0.1741	-0.008	0.7044		48897	rs17323093	T	0.1685	0.2165	-0.0072	0.7345		48897	rs13027234	T	0.1613	0.1879	-0.008	0.7044		48897	rs17323093	T	0.1164	0.1557	-0.0072	0.7345		48897	rs17323093	T	0.1729	0.1667	-0.0072
48910	11	98191444	98702847		0.0326	0.0412	0.03776	0.02187	0.05229	0.034038		48910	rs11217079	G	0.2921	0.3097	0.0326	0.05229		48910	rs12362499	G	0.2851	0.2988	0.0412	0.02187		48910	rs11217079	G	0.3556	0.2994	0.0326	0.05229		48910	rs12362499	G	0.363	0.2861	0.0412	0.02187		48910	rs12362499	G	0.3179	0.3079	0.0412
49178	9	116493489	117467553		0.0761	0.0897	0.07882	0.02382	0.05388	0.047868		49178	rs16930907	T	0.04196	0.05211	0.0761	0.05388		49178	rs16930907	T	0.04354	0.01829	0.0761	0.05388		49178	rs16930907	T	0.05546	0.03898	0.0761	0.05388		49178	rs16930907	T	0.04225	0.04242	0.0761	0.05388		49178	rs16931058	A	0.04189	0.03442	0.0897
49373	6	149436538	149492777		0.0275	0.0366	0.03294	0.0221	0.09833	0.048904		49373	rs12191264	A	0.4054	0.3775	0.0335	0.03719		49373	rs4897081	A	0.3876	0.311	0.0275	0.09833		49373	rs12210437	T	0.3873	0.3739	0.0337	0.04006		49373	rs2069314	G	0.3425	0.3473	0.0366	0.0221		49373	rs11155625	C	0.3854	0.3497	0.0334
49643	4	176161041	176398028		0.0378	0.0378	0.0378	0.02224	0.02224	0.02224		49643	rs10014039	G	0.3596	0.3646	0.0378	0.02224		49643	rs10014039	G	0.3638	0.2927	0.0378	0.02224		49643	rs10014039	G	0.3471	0.3382	0.0378	0.02224		49643	rs10014039	G	0.3151	0.3383	0.0378	0.02224		49643	rs10014039	G	0.3749	0.3432	0.0378
49914	13	107368910	108591472		0.021	0.0367	0.02728	0.02848	0.1971	0.129652		49914	rs843839	A	0.4902	0.469	0.0367	0.02848		49914	rs843839	A	0.4747	0.3933	0.0367	0.02848		49914	rs816976	C	0.4768	0.4794	0.021	0.1971		49914	rs816976	C	0.3973	0.4701	0.021	0.1971		49914	rs816976	C	0.4968	0.4731	0.021
49917	16	86673631	88116130	ENSG00000261193	-0.0306	-0.0306	-0.0306	0.05367	0.05367	0.05367		49917	rs4843792	G	0.3696	0.378	-0.0306	0.05367		49917	rs4843792	G	0.3666	0.3293	-0.0306	0.05367		49917	rs4843792	G	0.3217	0.375	-0.0306	0.05367		49917	rs4843792	G	0.4041	0.3653	-0.0306	0.05367		49917	rs4843792	G	0.3428	0.3691	-0.0306
50100	16	29896442	29986525	TMEM219	-0.0332	-0.0294	-0.03166	0.03875	0.05857	0.047914		50100	rs11150576	T	0.4472	0.459	-0.0324	0.04637		50100	rs7190185	G	0.4101	0.4695	-0.0301	0.05713		50100	rs4583255	G	0.451	0.4539	-0.0294	0.05857		50100	rs11150577	A	0.4932	0.4299	-0.0332	0.03875		50100	rs11150577	A	0.4343	0.4645	-0.0332
50120	15	94058707	96257703	ENSG00000275016	-0.0334	-0.0317	-0.0326	0.04971	0.06128	0.056562		50120	rs12910231	C	0.2719	0.2888	-0.0328	0.06083		50120	rs16975550	A	0.3042	0.25	-0.0334	0.04971		50120	rs16975550	A	0.2959	0.2812	-0.0334	0.04971		50120	rs17506333	G	0.2945	0.3273	-0.0317	0.06128		50120	rs17506333	G	0.2579	0.2929	-0.0317
50239	19	37875631	42578170	ZNF569	0.0244	0.0356	0.02706	0.02252	0.1249	0.100004		50239	rs10419281	C	0.4804	0.4567	0.0265	0.1028		50239	rs256733	T	0.4888	0.4482	0.0244	0.1249		50239	rs2385181	C	0.4902	0.4775	0.0356	0.02252		50239	rs256733	T	0.4658	0.4671	0.0244	0.1249		50239	rs256733	T	0.482	0.4848	0.0244
50277	15	88439196	90647988	IDH2-DT	-0.0405	-0.0319	-0.03878	0.04083	0.1175	0.056164		50277	rs4553601	G	0.1789	0.199	-0.0405	0.04083		50277	rs4553601	G	0.1868	0.1921	-0.0405	0.04083		50277	rs6496622	C	0.1827	0.2012	-0.0319	0.1175		50277	rs4553601	G	0.2192	0.1837	-0.0405	0.04083		50277	rs4553601	G	0.1732	0.1937	-0.0405
50320	1	202520911	204254288	PLEKHA6	0.0336	0.038	0.03658	0.02337	0.04401	0.02963		50320	rs4245726	C	0.3857	0.3686	0.038	0.02337		50320	rs4245726	C	0.3638	0.3232	0.038	0.02337		50320	rs4245726	C	0.3975	0.3618	0.038	0.02337		50320	rs4631764	T	0.4178	0.3383	0.0336	0.04401		50320	rs10793760	A	0.3892	0.3799	0.0353
50362	21	42786439	43916339	RSPH1	-0.038	-0.034	-0.0368	0.02258	0.03319	0.025272		50362	rs2839536	T	0.3661	0.3875	-0.038	0.02258		50362	rs2839536	T	0.3975	0.3659	-0.038	0.02258		50362	rs9979100	A	0.3725	0.3993	-0.034	0.03319		50362	rs2839536	T	0.3904	0.3892	-0.038	0.02258		50362	rs1573413	A	0.3769	0.4155	-0.036
50402	15	79805846	82068380	ENSG00000259692	0.0275	0.0312	0.02914	0.05344	0.09436	0.071038		50402	rs11073015	A	0.3946	0.352	0.0312	0.05344		50402	rs4641699	T	0.3919	0.3415	0.0275	0.09436		50402	rs11633356	A	0.3975	0.3636	0.029	0.06913		50402	rs11633356	A	0.4247	0.4491	0.029	0.06913		50402	rs11633356	A	0.3832	0.3597	0.029
51037	1	206262704	208196081		0.0926	0.1156	0.1018	0.02294	0.07294	0.05294		51037	rs1193096	A	0.02857	0.01774	0.0926	0.07294		51037	rs2767567	T	0.0309	0.01829	0.1156	0.02294		51037	rs2767567	T	0.02763	0.02121	0.1156	0.02294		51037	rs1193096	A	0.03425	0.01796	0.0926	0.07294		51037	rs1193096	A	0.03376	0.02437	0.0926
51121	18	40364087	42110089	LINC01478	-0.0438	-0.0355	-0.03908	0.05396	0.09596	0.076516		51121	rs11082399	G	0.1438	0.1669	-0.0355	0.08935		51121	rs954794	A	0.1166	0.1341	-0.0438	0.05396		51121	rs11082399	G	0.1551	0.1687	-0.0355	0.08935		51121	rs954794	A	0.1096	0.1054	-0.0438	0.05396		51121	rs9945931	T	0.1251	0.1442	-0.0368
51369	7	143385892	143754959	OR2A5	0.0404	0.0418	0.04152	0.02611	0.03109	0.027106		51369	rs12672742	A	0.225	0.1962	0.0418	0.02611		51369	rs1320892	A	0.2008	0.2165	0.0404	0.03109		51369	rs12672742	A	0.2036	0.2115	0.0418	0.02611		51369	rs12672742	A	0.2055	0.2335	0.0418	0.02611		51369	rs12672742	A	0.2321	0.1962	0.0418
51498	15	56990907	59190930	SLTM,RNF111	-0.0413	-0.0386	-0.03938	0.05121	0.05895	0.056142		51498	rs10518991	T	0.1545	0.184	-0.039	0.05685		51498	rs173214	G	0.1882	0.2104	-0.0386	0.05895		51498	rs10518992	C	0.1533	0.1691	-0.0413	0.05121		51498	rs10518991	T	0.2055	0.1807	-0.039	0.05685		51498	rs10518991	T	0.1747	0.1969	-0.039
51564	1	111655643	111869948	CHIA	-0.0504	-0.0362	-0.04756	0.02319	0.1205	0.042652		51564	rs12127313	A	0.1366	0.1397	-0.0504	0.02319		51564	rs12137697	T	0.1437	0.1494	-0.0362	0.1205		51564	rs12127313	A	0.1324	0.1612	-0.0504	0.02319		51564	rs12127313	A	0.137	0.1317	-0.0504	0.02319		51564	rs12127313	A	0.1372	0.167	-0.0504
51768	7	83437319	83627847	SEMA3A	-0.0442	-0.0244	-0.03068	0.02328	0.3075	0.147416		51768	rs10239654	A	0.1929	0.2068	-0.0291	0.1222		51768	rs10239654	A	0.2065	0.186	-0.0291	0.1222		51768	rs10226850	T	0.2219	0.2145	-0.0266	0.1619		51768	rs6963635	T	0.1781	0.2365	-0.0442	0.02328		51768	rs10280701	T	0.1983	0.2303	-0.0244
52118	6	3658878	3730570	ENSG00000228793	0.0258	0.0823	0.04404	0.02345	0.4192	0.24123		52118	rs12199238	A	0.05982	0.0616	0.0377	0.2513		52118	rs17137008	G	0.07725	0.04268	0.0823	0.02345		52118	rs12216320	G	0.06506	0.06545	0.0258	0.4192		52118	rs12207455	A	0.06849	0.07186	0.0369	0.2627		52118	rs10458077	G	0.07466	0.04919	0.0375
52121	13	35359216	36461216	DCLK1	0.037	0.037	0.037	0.02345	0.02345	0.02345		52121	rs7990263	A	0.3589	0.3276	0.037	0.02345		52121	rs7990263	A	0.3497	0.2957	0.037	0.02345		52121	rs7990263	A	0.3393	0.3285	0.037	0.02345		52121	rs7990263	A	0.4384	0.3413	0.037	0.02345		52121	rs7990263	A	0.3453	0.3113	0.037
52271	17	13305719	13368963		0.0283	0.0332	0.03054	0.06669	0.1301	0.100198		52271	rs16947942	C	0.2795	0.2569	0.0283	0.1301		52271	rs7502538	C	0.2626	0.2957	0.0332	0.06669		52271	rs2190822	T	0.2946	0.2648	0.0304	0.1014		52271	rs2190822	T	0.3357	0.2994	0.0304	0.1014		52271	rs2190822	T	0.2894	0.2755	0.0304
52677	1	202772110	204566999	MDM4	-0.0322	-0.0269	-0.02918	0.03748	0.09537	0.068328		52677	rs10458588	C	0.4652	0.4834	-0.0269	0.09537		52677	rs12402641	A	0.4986	0.4601	-0.0277	0.07594		52677	rs10458588	C	0.4403	0.4994	-0.0269	0.09537		52677	rs11240762	T	0.4589	0.4401	-0.0322	0.03748		52677	rs11240762	T	0.4658	0.4669	-0.0322
52708	10	13743517	13783523	FRMD4A	-0.0407	-0.0407	-0.0407	0.02375	0.02375	0.02375		52708	rs1541004	A	0.2054	0.2295	-0.0407	0.02375		52708	rs1541004	A	0.2486	0.2378	-0.0407	0.02375		52708	rs1541004	A	0.2487	0.2309	-0.0407	0.02375		52708	rs1541004	A	0.1918	0.2485	-0.0407	0.02375		52708	rs1541004	A	0.2389	0.2724	-0.0407
52774	16	5022232	5082231	NAGPA,ENSG00000267072	0.0359	0.0359	0.0359	0.03114	0.03114	0.03114		52774	rs1001170	G	0.3938	0.3628	0.0359	0.03114		52774	rs1001170	G	0.3722	0.3384	0.0359	0.03114		52774	rs1001170	G	0.3734	0.337	0.0359	0.03114		52774	rs1001170	G	0.3542	0.3054	0.0359	0.03114		52774	rs1001170	G	0.3602	0.3772	0.0359
52987	4	11116552	11507454		0.0326	0.0333	0.03316	0.04398	0.05641	0.046466		52987	rs4916640	A	0.3274	0.3121	0.0333	0.04398		52987	rs4916640	A	0.323	0.3079	0.0333	0.04398		52987	rs4916640	A	0.3128	0.3085	0.0333	0.04398		52987	rs4916640	A	0.3288	0.3353	0.0333	0.04398		52987	rs13152063	A	0.3265	0.2871	0.0326
52994	12	111244857	112963560	HECTD4	0.0436	0.0479	0.04612	0.0802	0.1129	0.092352		52994	rs10850033	C	0.1034	0.08398	0.0479	0.08631		52994	rs10850033	C	0.1053	0.06402	0.0479	0.08631		52994	rs11066257	G	0.09091	0.09394	0.0436	0.1129		52994	rs1989949	C	0.1301	0.08485	0.0464	0.0802		52994	rs10774654	G	0.0857	0.0914	0.0448
53073	10	71224480	71556310		-0.0268	-0.0267	-0.02678	0.09226	0.104	0.094608		53073	rs12411657	T	0.3518	0.3701	-0.0268	0.09226		53073	rs12411657	T	0.3596	0.3689	-0.0268	0.09226		53073	rs768505	T	0.3536	0.3704	-0.0267	0.104		53073	rs12411657	T	0.3219	0.3593	-0.0268	0.09226		53073	rs12411657	T	0.346	0.3945	-0.0268
53372	11	119666327	120161117	POU2F3	-0.0357	-0.0353	-0.03546	0.03948	0.0419	0.040932		53372	rs10790374	C	0.2688	0.286	-0.0353	0.0419		53372	rs7951628	A	0.2767	0.2683	-0.0357	0.03948		53372	rs7951628	A	0.2701	0.2909	-0.0357	0.03948		53372	rs10790374	C	0.3056	0.2994	-0.0353	0.0419		53372	rs10790374	C	0.2598	0.2929	-0.0353
53615	14	88634741	89564988		0.0316	0.0408	0.03712	0.02421	0.06739	0.041482		53615	rs11621824	G	0.2938	0.2764	0.0408	0.02421		53615	rs4904502	G	0.3104	0.2927	0.0316	0.06739		53615	rs4904502	G	0.3012	0.3145	0.0316	0.06739		53615	rs11621824	G	0.3425	0.2892	0.0408	0.02421		53615	rs11621824	G	0.2906	0.2665	0.0408
53677	5	31069613	31105370		0.0373	0.0373	0.0373	0.02425	0.02425	0.02425		53677	rs10520964	G	0.317	0.2991	0.0373	0.02425		53677	rs10520964	G	0.2697	0.2927	0.0373	0.02425		53677	rs10520964	G	0.3084	0.3042	0.0373	0.02425		53677	rs10520964	G	0.226	0.3024	0.0373	0.02425		53677	rs10520964	G	0.2968	0.2698	0.0373
53776	19	55017465	59709277	LAIR2	0.0523	0.0523	0.0523	0.02429	0.02429	0.02429		53776	rs6509881	T	0.3312	0.3021	0.0523	0.02429		53776	rs6509881	T	0.3034	0.2622	0.0523	0.02429		53776	rs6509881	T	0.3217	0.2834	0.0523	0.02429		53776	rs6509881	T	0.3219	0.3102	0.0523	0.02429		53776	rs6509881	T	0.3014	0.3122	0.0523
53785	5	177893038	177960432	COL23A1	-0.0359	-0.0239	-0.0263	0.0243	0.14	0.11686		53785	rs4976788	T	0.4902	0.4861	-0.0239	0.14		53785	rs12653107	T	0.4621	0.4634	-0.0359	0.0243		53785	rs4976788	T	0.4928	0.4976	-0.0239	0.14		53785	rs4976788	T	0.4247	0.4488	-0.0239	0.14		53785	rs4976788	T	0.4688	0.4955	-0.0239
53902	5	142011935	142037091	FGF1,SPRY4-AS1	0.0649	0.1291	0.0845	0.02681	0.2147	0.163562		53902	rs17099157	A	0.03036	0.02494	0.0818	0.1808		53902	rs17099158	G	0.02107	0.03659	0.0649	0.2147		53902	rs17099158	G	0.02763	0.02242	0.0649	0.2147		53902	rs17099157	A	0.03425	0.02395	0.0818	0.1808		53902	rs10058307	A	0.03118	0.02162	0.1291
54324	12	105753835	107229705	RIC8B	0.0389	0.0397	0.03954	0.03288	0.03529	0.034808		54324	rs10444533	T	0.2134	0.1896	0.0397	0.03529		54324	rs10861661	C	0.2683	0.2073	0.0389	0.03288		54324	rs10444533	T	0.2291	0.2024	0.0397	0.03529		54324	rs10444533	T	0.2192	0.2078	0.0397	0.03529		54324	rs10444533	T	0.2302	0.2299	0.0397
54511	11	114166486	114661276		-0.0354	-0.0301	-0.03352	0.02465	0.06654	0.03897		54511	rs11215203	T	0.3661	0.3902	-0.0301	0.06654		54511	rs11600245	T	0.4101	0.4146	-0.0313	0.05436		54511	rs10891753	A	0.4118	0.3964	-0.0354	0.02465		54511	rs10891753	A	0.4726	0.3922	-0.0354	0.02465		54511	rs10891753	A	0.398	0.4256	-0.0354
54564	10	133239213	133349803		-0.0329	-0.0327	-0.03274	0.07949	0.09028	0.081648		54564	rs4301710	G	0.2161	0.2417	-0.0327	0.07949		54564	rs4301710	G	0.2051	0.2652	-0.0327	0.07949		54564	rs4301710	G	0.213	0.2142	-0.0327	0.07949		54564	rs4301710	G	0.2329	0.2186	-0.0327	0.07949		54564	rs10830034	A	0.232	0.2253	-0.0329
54666	4	101070560	101226212	H2AZ1-DT	-0.0281	-0.021	-0.02346	0.1211	0.2791	0.22982		54666	rs2866185	G	0.1857	0.2073	-0.0234	0.2411		54666	rs2866185	G	0.2121	0.1799	-0.0234	0.2411		54666	rs12502279	T	0.2219	0.2448	-0.0281	0.1211		54666	rs2866190	A	0.2329	0.2152	-0.0214	0.2667		54666	rs12510456	A	0.2229	0.1959	-0.021
54753	6	85054891	85127568		-0.0454	-0.0427	-0.0443	0.02478	0.04232	0.030512		54753	rs6901000	A	0.1512	0.1652	-0.0446	0.02798		54753	rs6901000	A	0.1742	0.1524	-0.0446	0.02798		54753	rs10484977	T	0.1536	0.1788	-0.0442	0.0295		54753	rs7743112	G	0.1301	0.2066	-0.0454	0.02478		54753	rs1883896	T	0.1729	0.1736	-0.0427
54853	5	149812860	149827494	RPS14	-0.0291	-0.0269	-0.02734	0.08918	0.114	0.109036		54853	rs2748241	T	0.283	0.2838	-0.0269	0.114		54853	rs2748241	T	0.2879	0.2927	-0.0269	0.114		54853	rs10447222	G	0.2843	0.2891	-0.0291	0.08918		54853	rs2748241	T	0.226	0.3623	-0.0269	0.114		54853	rs2748241	T	0.297	0.3363	-0.0269
55056	6	56898034	57163313	ZNF451,ZNF451-AS1	0.0372	0.0472	0.04354	0.1139	0.1987	0.14392		55056	rs1002996	G	0.07527	0.07525	0.0372	0.1987		55056	rs6932278	A	0.09129	0.05793	0.0407	0.1783		55056	rs1040461	T	0.08556	0.06545	0.0472	0.1148		55056	rs1993118	C	0.05479	0.09036	0.0463	0.1139		55056	rs1993118	C	0.07279	0.08499	0.0463
55057	7	126407791	126621133	GRM8	-0.0293	-0.025	-0.02658	0.07312	0.1166	0.097178		55057	rs1155597	T	0.3643	0.3853	-0.0293	0.07312		55057	rs1204579	C	0.3624	0.4055	-0.025	0.1166		55057	rs1154325	G	0.3592	0.4028	-0.0261	0.1001		55057	rs1154325	G	0.4658	0.3772	-0.0261	0.1001		55057	rs1154324	C	0.3629	0.3689	-0.0264
55233	6	42098079	42206057	C6orf132	0.0365	0.0387	0.03738	0.05875	0.07402	0.067912		55233	rs9471779	C	0.2272	0.212	0.0387	0.05875		55233	rs9471779	C	0.2247	0.1738	0.0387	0.05875		55233	rs9471778	C	0.2068	0.2112	0.0365	0.07402		55233	rs9471778	C	0.2569	0.1737	0.0365	0.07402		55233	rs9471778	C	0.1865	0.2074	0.0365
55313	11	34467848	34519578	CAT	0.0314	0.052	0.03896	0.02507	0.1806	0.11085		55313	rs16925614	T	0.1402	0.111	0.0314	0.1806		55313	rs16925614	T	0.1334	0.1433	0.0314	0.1806		55313	rs3758736	A	0.1221	0.1194	0.052	0.02507		55313	rs2300182	A	0.2123	0.1018	0.0365	0.1062		55313	rs16925668	G	0.1359	0.1386	0.0435
55368	3	152234694	153726573		-0.0307	-0.024	-0.02716	0.04816	0.1267	0.089112		55368	rs1278095	T	0.4696	0.4884	-0.024	0.1267		55368	rs1278095	T	0.4915	0.4663	-0.024	0.1267		55368	rs1299209	T	0.4599	0.4758	-0.0276	0.08465		55368	rs1278106	G	0.4236	0.4132	-0.0295	0.05935		55368	rs1278105	A	0.4694	0.5	-0.0307
55430	20	44814346	45384968		0.0306	0.0395	0.03342	0.02512	0.08757	0.062648		55430	rs4810549	G	0.3166	0.2936	0.0332	0.05649		55430	rs4810549	G	0.3174	0.2561	0.0332	0.05649		55430	rs6063020	T	0.3271	0.3048	0.0395	0.02512		55430	rs6018028	G	0.363	0.3293	0.0306	0.08757		55430	rs6018028	G	0.3268	0.3273	0.0306
55436	5	90179724	90215480	ADGRV1	-0.0625	-0.0459	-0.05474	0.02621	0.1261	0.06632		55436	rs10942615	G	0.075	0.08814	-0.0625	0.02621		55436	rs10942615	G	0.07584	0.08537	-0.0625	0.02621		55436	rs6893164	C	0.06506	0.09091	-0.0514	0.07654		55436	rs6893164	C	0.08904	0.07485	-0.0514	0.07654		55436	rs10942617	C	0.07271	0.06093	-0.0459
55461	2	240369980	240710284	ENSG00000220256	0.0377	0.0544	0.05106	0.02514	0.1079	0.041692		55461	rs12614692	T	0.1518	0.1181	0.0544	0.02514		55461	rs12614692	T	0.1559	0.1128	0.0544	0.02514		55461	rs12614692	T	0.1444	0.1345	0.0544	0.02514		55461	rs12614692	T	0.1781	0.1527	0.0544	0.02514		55461	rs12053210	T	0.1399	0.1395	0.0377
55763	20	36460620	37064744		0.0336	0.0424	0.03592	0.03442	0.08828	0.070046		55763	rs1315306	G	0.2036	0.219	0.0424	0.03442		55763	rs1780634	T	0.2065	0.1585	0.0342	0.08569		55763	rs1739643	A	0.2219	0.2139	0.0347	0.07092		55763	rs1739643	A	0.2292	0.2305	0.0347	0.07092		55763	rs1119803	T	0.1977	0.2263	0.0336
55841	3	115546472	117023324	LSAMP	-0.0829	-0.0724	-0.0808	0.02532	0.07462	0.03518		55841	rs17711047	G	0.04383	0.06153	-0.0829	0.02532		55841	rs17711047	G	0.04073	0.03049	-0.0829	0.02532		55841	rs7628605	G	0.04545	0.03818	-0.0724	0.07462		55841	rs17711047	G	0.0274	0.0479	-0.0829	0.02532		55841	rs17711047	G	0.04145	0.05258	-0.0829
56318	17	29886632	32887607		0.0374	0.0381	0.03772	0.08597	0.09298	0.090124		56318	rs4795932	T	0.1598	0.1375	0.0378	0.09298		56318	rs8076440	A	0.1483	0.1512	0.0375	0.08597		56318	rs7215454	C	0.1464	0.1303	0.0374	0.09213		56318	rs4795932	T	0.1575	0.1437	0.0378	0.09298		56318	rs11080281	A	0.1567	0.1376	0.0381
56341	14	97481579	98413635	LINC01550	-0.0374	-0.0337	-0.0355	0.02557	0.04102	0.032468		56341	rs11847075	T	0.3121	0.3458	-0.0374	0.02557		56341	rs11847075	T	0.2935	0.3293	-0.0374	0.02557		56341	rs2236494	A	0.32	0.323	-0.0345	0.03509		56341	rs2236494	A	0.2671	0.2994	-0.0345	0.03509		56341	rs12435678	C	0.3282	0.3676	-0.0337
56344	18	13596170	13606170	LDLRAD4	0.0354	0.0354	0.0354	0.02827	0.02827	0.02827		56344	rs6505831	C	0.4509	0.4606	0.0354	0.02827		56344	rs6505831	C	0.4888	0.4512	0.0354	0.02827		56344	rs6505831	C	0.4483	0.4829	0.0354	0.02827		56344	rs6505831	C	0.4589	0.4641	0.0354	0.02827		56344	rs6505831	C	0.4678	0.4204	0.0354
56464	2	234809526	235144787		0.0277	0.0367	0.0295	0.02563	0.0813	0.070166		56464	rs4663116	A	0.383	0.3636	0.0277	0.0813		56464	rs4663116	A	0.3933	0.3811	0.0277	0.0813		56464	rs4663116	A	0.3761	0.3667	0.0277	0.0813		56464	rs4663116	A	0.3493	0.3862	0.0277	0.0813		56464	rs13427623	T	0.3721	0.3369	0.0367
56541	13	73304295	74396751	KLF12	-0.0236	-0.0145	-0.02178	0.2132	0.4232	0.2552		56541	rs17061524	A	0.208	0.2269	-0.0236	0.2132		56541	rs17061524	A	0.2303	0.1687	-0.0236	0.2132		56541	rs2209726	C	0.2745	0.2636	-0.0145	0.4232		56541	rs17061524	A	0.1918	0.2186	-0.0236	0.2132		56541	rs17061524	A	0.2106	0.186	-0.0236
56630	11	113486451	113982321	ZBTB16	0.0341	0.0383	0.03494	0.02571	0.04073	0.037726		56630	rs17116384	G	0.3223	0.2988	0.0341	0.04073		56630	rs73000965	A	0.3258	0.2805	0.0383	0.02571		56630	rs17116384	G	0.3027	0.2982	0.0341	0.04073		56630	rs17116384	G	0.2534	0.3394	0.0341	0.04073		56630	rs17116384	G	0.3312	0.2923	0.0341
56785	8	33524179	33643721	ENSG00000253642	0.0313	0.0313	0.0313	0.05166	0.05166	0.05166		56785	rs10107668	C	0.4152	0.3947	0.0313	0.05166		56785	rs10107668	C	0.448	0.3689	0.0313	0.05166		56785	rs10107668	C	0.4091	0.4194	0.0313	0.05166		56785	rs10107668	C	0.3562	0.4072	0.0313	0.05166		56785	rs10107668	C	0.4145	0.4032	0.0313
56860	9	93322474	94289030		0.0201	0.0304	0.02628	0.06066	0.2301	0.116924		56860	rs10820865	T	0.3643	0.3476	0.0304	0.06066		56860	rs10820865	T	0.375	0.3933	0.0304	0.06066		56860	rs1412468	G	0.3768	0.3382	0.0254	0.114		56860	rs4744055	C	0.2945	0.2964	0.0201	0.2301		56860	rs1332377	G	0.3687	0.4087	0.0251
57190	13	106419620	107595455		-0.0271	-0.0253	-0.02674	0.1156	0.1255	0.12352		57190	rs288651	G	0.4025	0.4229	-0.0271	0.1255		57190	rs288651	G	0.3947	0.4848	-0.0271	0.1255		57190	rs9520255	C	0.4091	0.4503	-0.0253	0.1156		57190	rs288651	G	0.3699	0.3683	-0.0271	0.1255		57190	rs288651	G	0.3983	0.4034	-0.0271
57316	10	75517810	75847804	VCL	-0.0508	-0.0357	-0.04596	0.02604	0.1079	0.047042		57316	rs11596526	G	0.125	0.1414	-0.0508	0.02604		57316	rs4414157	G	0.1152	0.1067	-0.0454	0.04133		57316	rs11596526	G	0.1185	0.1456	-0.0508	0.02604		57316	rs7914469	A	0.1712	0.1135	-0.0357	0.1079		57316	rs12413620	C	0.1213	0.1619	-0.0471
57648	13	66241267	67343691	PCDH9	-0.021	-0.0195	-0.02054	0.2005	0.2279	0.20746		57648	rs9285255	A	0.3643	0.3694	-0.0206	0.2005		57648	rs9285255	A	0.3258	0.4177	-0.0206	0.2005		57648	rs2324967	C	0.3619	0.3758	-0.021	0.2042		57648	rs2324967	C	0.3151	0.3743	-0.021	0.2042		57648	rs1442013	A	0.3472	0.3871	-0.0195
57719	17	66843227	69342850		-0.0323	-0.03	-0.03046	0.04032	0.05685	0.053544		57719	rs2367385	T	0.383	0.3742	-0.03	0.05685		57719	rs2367385	T	0.389	0.4024	-0.03	0.05685		57719	rs4793547	G	0.3592	0.4103	-0.0323	0.04032		57719	rs2367385	T	0.4028	0.4102	-0.03	0.05685		57719	rs2367385	T	0.3642	0.4097	-0.03
57950	17	72132418	74639530		0.0266	0.0352	0.03104	0.02636	0.09682	0.056788		57950	rs717571	T	0.4973	0.48	0.0291	0.0672		57950	rs8073763	C	0.4845	0.4233	0.0266	0.09682		57950	rs717571	T	0.4705	0.4581	0.0291	0.0672		57950	rs719430	T	0.4452	0.5	0.0352	0.02636		57950	rs719430	T	0.4499	0.4521	0.0352
57982	14	97489409	98425432	LINC01550	-0.0391	-0.0258	-0.02972	0.04138	0.1599	0.120196		57982	rs11844273	A	0.2116	0.2478	-0.0274	0.1369		57982	rs899116	T	0.2008	0.2165	-0.0391	0.04138		57982	rs11844273	A	0.2291	0.2221	-0.0274	0.1369		57982	rs2014525	A	0.1781	0.2246	-0.0258	0.1599		57982	rs11160424	T	0.2258	0.2576	-0.0289
58327	6	102493076	102599035	GRIK2	0.0256	0.0331	0.03038	0.03705	0.1014	0.058684		58327	rs1034254	A	0.4652	0.4274	0.0284	0.06875		58327	rs954765	C	0.427	0.4695	0.0331	0.03705		58327	rs2852611	C	0.4251	0.4218	0.0317	0.04917		58327	rs954765	C	0.3904	0.4061	0.0331	0.03705		58327	rs2518150	C	0.4364	0.3829	0.0256
58578	15	32108289	34320740	AVEN,CHRM5	-0.0447	-0.0401	-0.04274	0.03571	0.04986	0.04187		58578	rs2078562	A	0.1438	0.168	-0.0446	0.03615		58578	rs6495459	C	0.1643	0.2165	-0.0401	0.04986		58578	rs2632075	A	0.1524	0.1588	-0.0442	0.03777		58578	rs6495459	C	0.1781	0.1856	-0.0401	0.04986		58578	rs2684932	T	0.1567	0.1598	-0.0447
58582	2	30756443	30905936		0.0317	0.0349	0.03426	0.03295	0.04626	0.035612		58582	rs2123752	T	0.433	0.4213	0.0349	0.03295		58582	rs2123752	T	0.3848	0.4573	0.0349	0.03295		58582	rs2593477	C	0.4679	0.4314	0.0317	0.04626		58582	rs2123752	T	0.4863	0.4152	0.0349	0.03295		58582	rs2123752	T	0.4178	0.4449	0.0349
59115	13	106377466	107579465		-0.035	-0.035	-0.035	0.02698	0.02698	0.02698		59115	rs433782	A	0.3696	0.3941	-0.035	0.02698		59115	rs433782	A	0.3764	0.4451	-0.035	0.02698		59115	rs433782	A	0.3681	0.3897	-0.035	0.02698		59115	rs433782	A	0.3151	0.3593	-0.035	0.02698		59115	rs433782	A	0.3684	0.381	-0.035
59280	21	35738222	36816352	RUNX1	0.0338	0.0338	0.0338	0.09252	0.09252	0.09252		59280	rs11910142	G	0.1741	0.1868	0.0338	0.09252		59280	rs11910142	G	0.1685	0.2012	0.0338	0.09252		59280	rs11910142	G	0.1943	0.1578	0.0338	0.09252		59280	rs11910142	G	0.1918	0.1737	0.0338	0.09252		59280	rs11910142	G	0.1653	0.19	0.0338
59389	11	86022779	86345131	ME3,ENSG00000254733	-0.0382	-0.0314	-0.03672	0.07818	0.1621	0.098		59389	rs10898512	T	0.1312	0.143	-0.0382	0.09336		59389	rs722158	G	0.1362	0.1433	-0.038	0.07818		59389	rs722158	G	0.1275	0.1552	-0.038	0.07818		59389	rs722158	G	0.1507	0.1198	-0.038	0.07818		59389	rs1938927	C	0.1477	0.1333	-0.0314
59473	21	26628194	27715263		0.0283	0.0322	0.0303	0.03905	0.08508	0.05809		59473	rs13050454	A	0.4429	0.4096	0.0322	0.03905		59473	rs2830165	G	0.3848	0.4543	0.0283	0.08508		59473	rs13050454	A	0.4135	0.4236	0.0322	0.03905		59473	rs2212805	G	0.4589	0.3713	0.0289	0.06164		59473	rs1599987	G	0.4063	0.4036	0.0299
59768	1	95658521	95888194		0.0388	0.0469	0.04392	0.03404	0.0693	0.045466		59768	rs4428940	T	0.1455	0.1325	0.0469	0.03404		59768	rs4428940	T	0.1629	0.1189	0.0469	0.03404		59768	rs11165421	A	0.1551	0.1655	0.0401	0.05591		59768	rs4428940	T	0.1507	0.1976	0.0469	0.03404		59768	rs1012776	C	0.1625	0.1628	0.0388
59800	11	125146578	125777056	DDX25,ENSG00000255027	-0.0359	-0.0236	-0.03098	0.02731	0.128	0.067586		59800	rs485878	A	0.4071	0.4268	-0.0359	0.02731		59800	rs573327	G	0.4663	0.3963	-0.0236	0.128		59800	rs573327	G	0.4483	0.4745	-0.0236	0.128		59800	rs485878	A	0.3699	0.4162	-0.0359	0.02731		59800	rs485878	A	0.4266	0.4288	-0.0359
60046	16	12618526	12714394		0.0292	0.0324	0.03148	0.03818	0.06155	0.046548		60046	rs12708757	C	0.4205	0.3925	0.0314	0.04537		60046	rs4780466	T	0.3441	0.3902	0.0322	0.04811		60046	rs13338316	G	0.4269	0.3869	0.0322	0.03953		60046	rs4780469	A	0.4384	0.3623	0.0324	0.03818		60046	rs11645674	C	0.4266	0.4153	0.0292
60121	7	7946880	7980650	UMAD1,ENSG00000283549	-0.0344	-0.0338	-0.03428	0.02748	0.03045	0.028074		60121	rs6950165	A	0.467	0.4218	-0.0344	0.02748		60121	rs6950165	A	0.3975	0.4878	-0.0344	0.02748		60121	rs6950165	A	0.4162	0.4388	-0.0344	0.02748		60121	rs6950165	A	0.4863	0.4127	-0.0344	0.02748		60121	rs10247586	T	0.4196	0.4503	-0.0338
60125	9	137138627	138001526	OLFM1	-0.0466	-0.0097	-0.01708	0.02748	0.677	0.547096		60125	rs12001599	C	0.1196	0.1497	-0.0097	0.677		60125	rs12001599	C	0.1447	0.1829	-0.0097	0.677		60125	rs9969691	G	0.1248	0.1572	-0.0466	0.02748		60125	rs12001599	C	0.1644	0.1476	-0.0097	0.677		60125	rs12001599	C	0.1484	0.144	-0.0097
60256	11	125645678	126164349	FOXRED1	0.0238	0.0335	0.02894	0.0637	0.2023	0.1288		60256	rs1786702	T	0.2482	0.2323	0.0238	0.2023		60256	rs625413	T	0.2612	0.1902	0.028	0.142		60256	rs478309	A	0.2611	0.2233	0.0335	0.0637		60256	rs587891	T	0.2055	0.2139	0.0297	0.118		60256	rs587891	T	0.2205	0.2379	0.0297
60332	12	114636812	116171381		-0.035	-0.0204	-0.02722	0.0276	0.187	0.10462		60332	rs1520175	C	0.442	0.4462	-0.023	0.1364		60332	rs1949548	C	0.4719	0.4543	-0.0347	0.0357		60332	rs10744863	G	0.4323	0.4673	-0.0204	0.187		60332	rs1520175	C	0.4178	0.4518	-0.023	0.1364		60332	rs10507265	G	0.4937	0.4812	-0.035
60619	2	56399349	56528075	CCDC85A,ENSG00000271894	-0.0337	-0.0303	-0.03272	0.06973	0.09903	0.079472		60619	rs12469239	A	0.2241	0.2494	-0.0303	0.09903		60619	rs1549030	C	0.2247	0.2043	-0.0337	0.0762		60619	rs2058870	C	0.2282	0.2582	-0.0322	0.06973		60619	rs1549030	C	0.2192	0.2305	-0.0337	0.0762		60619	rs1549030	C	0.1995	0.2348	-0.0337
61107	16	12209148	12301647	SNX29	0.0338	0.0338	0.0338	0.08826	0.08826	0.08826		61107	rs11644280	T	0.2179	0.1973	0.0338	0.08826		61107	rs11644280	T	0.1952	0.1524	0.0338	0.08826		61107	rs11644280	T	0.2161	0.1855	0.0338	0.08826		61107	rs11644280	T	0.1233	0.1826	0.0338	0.08826		61107	rs11644280	T	0.2092	0.179	0.0338
61168	6	111001737	111155400		0.0234	0.0391	0.03284	0.02805	0.2083	0.09987		61168	rs1279585	G	0.2759	0.2611	0.0391	0.02805		61168	rs2817773	C	0.2556	0.2622	0.0235	0.2069		61168	rs2691185	C	0.2598	0.2248	0.0234	0.2083		61168	rs1279585	G	0.2708	0.2982	0.0391	0.02805		61168	rs1279585	G	0.2791	0.2819	0.0391
61363	1	19301516	19500729	UBR4	-0.034	-0.0248	-0.0318	0.03559	0.1153	0.053038		61363	rs1043899	C	0.425	0.4446	-0.0334	0.0381		61363	rs6694521	G	0.389	0.3262	-0.0248	0.1153		61363	rs4912046	T	0.4055	0.4308	-0.034	0.03559		61363	rs1043899	C	0.4315	0.3892	-0.0334	0.0381		61363	rs1043899	C	0.4054	0.4383	-0.0334
61415	8	26907937	27006659		-0.0311	-0.0278	-0.02888	0.07714	0.12	0.103946		61415	rs12675131	T	0.2473	0.2639	-0.0278	0.12		61415	rs12675131	T	0.2725	0.2561	-0.0278	0.12		61415	rs10503810	C	0.2531	0.2836	-0.0288	0.1064		61415	rs7823902	C	0.2192	0.2741	-0.0311	0.07714		61415	rs13275096	T	0.2721	0.2734	-0.0289
61490	2	69502024	69648520	NFU1	0.0148	0.0192	0.0175	0.2334	0.3419	0.27808		61490	rs10175692	G	0.4258	0.3947	0.0192	0.2334		61490	rs6722492	T	0.3961	0.4116	0.0191	0.2369		61490	rs7559850	C	0.4225	0.3806	0.0172	0.2891		61490	rs7559850	C	0.3767	0.4132	0.0172	0.2891		61490	rs10170036	A	0.3952	0.402	0.0148
61556	5	174733552	174805375		0.0406	0.0438	0.04316	0.02826	0.04618	0.031844		61556	rs2644656	A	0.1964	0.1826	0.0438	0.02826		61556	rs2644656	A	0.2022	0.1768	0.0438	0.02826		61556	rs2644656	A	0.1991	0.1829	0.0438	0.02826		61556	rs2644656	A	0.1918	0.2048	0.0438	0.02826		61556	rs2607181	T	0.1804	0.1563	0.0406
61786	7	134048047	134398634		0.0288	0.0382	0.03188	0.06259	0.1708	0.124558		61786	rs10275303	G	0.1741	0.1619	0.0308	0.1298		61786	rs6960688	T	0.2065	0.1829	0.0382	0.06259		61786	rs10275303	G	0.1613	0.1655	0.0308	0.1298		61786	rs10275303	G	0.1918	0.2006	0.0308	0.1298		61786	rs10245702	T	0.1625	0.1843	0.0288
61864	13	24315196	25503646	CENPJ	-0.0441	-0.041	-0.04238	0.02889	0.04368	0.036538		61864	rs7324227	C	0.1771	0.1903	-0.0441	0.02889		61864	rs9511498	A	0.1615	0.1585	-0.041	0.04121		61864	rs3759457	G	0.1444	0.1824	-0.0423	0.03571		61864	rs7997326	T	0.1849	0.2036	-0.0416	0.04368		61864	rs7329688	C	0.164	0.1744	-0.0429
62019	5	71409383	71445139	MAP1B	-0.0365	-0.0365	-0.0365	0.05192	0.05192	0.05192		62019	rs7732739	G	0.2034	0.2112	-0.0365	0.05192		62019	rs7732739	G	0.1812	0.2713	-0.0365	0.05192		62019	rs7732739	G	0.1916	0.223	-0.0365	0.05192		62019	rs7732739	G	0.2534	0.2395	-0.0365	0.05192		62019	rs7732739	G	0.1947	0.2254	-0.0365
62128	1	216276290	218214914		0.0274	0.035	0.03006	0.02855	0.08859	0.065602		62128	rs11118017	C	0.35	0.343	0.0293	0.07029		62128	rs6661310	A	0.382	0.3049	0.0274	0.08859		62128	rs12138324	A	0.3984	0.3659	0.035	0.02855		62128	rs11118017	C	0.3014	0.3623	0.0293	0.07029		62128	rs11118017	C	0.3537	0.3496	0.0293
62138	9	117197550	118255620	DELEC1,ENSG00000228714	-0.018	-0.0085	-0.011	0.4757	0.75	0.6749		62138	rs10982724	C	0.09911	0.117	-0.0089	0.7305		62138	rs9409154	C	0.1124	0.1585	-0.018	0.4757		62138	rs10982724	C	0.1061	0.1152	-0.0089	0.7305		62138	rs12238100	T	0.09589	0.08683	-0.0107	0.6878		62138	rs10817774	C	0.1021	0.1192	-0.0085
62179	15	60711470	62930243	TLN2	0.0297	0.0389	0.03154	0.02857	0.0738	0.064754		62179	rs7180961	A	0.3286	0.2993	0.0297	0.0738		62179	rs7180961	A	0.2992	0.3567	0.0297	0.0738		62179	rs7180961	A	0.3286	0.3061	0.0297	0.0738		62179	rs7180961	A	0.3425	0.3323	0.0297	0.0738		62179	rs6494333	C	0.323	0.2894	0.0389
62229	1	3037112	3047252	PRDM16	-0.0321	-0.0308	-0.03158	0.04931	0.05677	0.052294		62229	rs2817174	C	0.4089	0.4401	-0.0321	0.04931		62229	rs2817178	C	0.4031	0.4085	-0.0308	0.05677		62229	rs2817178	C	0.4055	0.4387	-0.0308	0.05677		62229	rs2817174	C	0.411	0.4192	-0.0321	0.04931		62229	rs2817174	C	0.4003	0.3882	-0.0321
62242	6	122203693	122245303		0.0504	0.0602	0.0539	0.0375	0.07208	0.05766		62242	rs1034443	G	0.09821	0.08259	0.0506	0.06756		62242	rs1034443	G	0.08989	0.08232	0.0506	0.06756		62242	rs1034442	A	0.09715	0.08848	0.0504	0.07208		62242	rs10872231	C	0.06849	0.04242	0.0577	0.0436		62242	rs12205320	G	0.08851	0.06745	0.0602
62332	11	43216900	43260324	HNRNPKP3	-0.0669	-0.0669	-0.0669	0.02865	0.02865	0.02865		62332	rs6485409	A	0.06004	0.07055	-0.0669	0.02865		62332	rs6485409	A	0.05618	0.09451	-0.0669	0.02865		62332	rs6485409	A	0.05909	0.06429	-0.0669	0.02865		62332	rs6485409	A	0.08219	0.05988	-0.0669	0.02865		62332	rs6485409	A	0.06529	0.06759	-0.0669
62374	10	60385073	60727887		0.0371	0.0373	0.03718	0.03878	0.04177	0.040574		62374	rs3851241	G	0.2875	0.2683	0.0373	0.03878		62374	rs3851241	G	0.243	0.25	0.0373	0.03878		62374	rs3851235	T	0.2941	0.243	0.0371	0.04177		62374	rs3851235	T	0.2671	0.2725	0.0371	0.04177		62374	rs3851235	T	0.2616	0.2384	0.0371
62547	17	44602679	47273967	B4GALNT2	-0.0511	-0.0376	-0.0457	0.06	0.1471	0.09484		62547	rs1533922	T	0.08929	0.1025	-0.0511	0.06		62547	rs1533922	T	0.1124	0.1159	-0.0511	0.06		62547	rs1533922	T	0.07576	0.1012	-0.0511	0.06		62547	rs2204211	A	0.1507	0.1198	-0.0376	0.1471		62547	rs2204211	A	0.1171	0.1088	-0.0376
62607	13	20995641	22143703	MICU2	0.0373	0.0441	0.04094	0.05602	0.09329	0.07165		62607	rs1200027	A	0.1545	0.1406	0.0408	0.07241		62607	rs9506708	C	0.1362	0.125	0.0417	0.06412		62607	rs1200027	A	0.1176	0.1467	0.0408	0.07241		62607	rs9509798	G	0.1575	0.1198	0.0441	0.05602		62607	rs9509769	G	0.1593	0.1383	0.0373
63129	7	37491419	37552703		0.0239	0.0335	0.02658	0.03633	0.1379	0.105142		63129	rs10951521	A	0.475	0.469	0.0239	0.1379		63129	rs11980720	A	0.4944	0.4817	0.0277	0.07568		63129	rs11763394	T	0.4804	0.4836	0.0335	0.03633		63129	rs10951521	A	0.4589	0.485	0.0239	0.1379		63129	rs10951521	A	0.4805	0.4535	0.0239
63261	5	71392581	71433805	ENSG00000285804	-0.0474	-0.0415	-0.04284	0.02915	0.04624	0.04256		63261	rs3806907	G	0.1446	0.158	-0.0423	0.04493		63261	rs6880685	A	0.1433	0.2165	-0.0415	0.04624		63261	rs6880685	A	0.1497	0.1752	-0.0415	0.04624		63261	rs6880685	A	0.2192	0.1677	-0.0415	0.04624		63261	rs10066438	A	0.1495	0.172	-0.0474
63299	3	66475868	66558558	LRIG1	0.0348	0.0348	0.0348	0.03736	0.03736	0.03736		63299	rs783511	T	0.3545	0.3185	0.0348	0.03736		63299	rs783511	T	0.3343	0.3262	0.0348	0.03736		63299	rs783511	T	0.3449	0.3287	0.0348	0.03736		63299	rs783511	T	0.2329	0.3174	0.0348	0.03736		63299	rs783511	T	0.3374	0.3105	0.0348
63901	4	84658805	84883367		0.0289	0.0329	0.0313	0.03429	0.07177	0.049282		63901	rs10004130	G	0.4205	0.3941	0.0329	0.03429		63901	rs10004130	G	0.4649	0.4695	0.0329	0.03429		63901	rs10004130	G	0.4305	0.397	0.0329	0.03429		63901	rs2125426	G	0.4315	0.4187	0.0289	0.07177		63901	rs2125426	G	0.3955	0.4292	0.0289
63989	3	150484844	151989041	SIAH2-AS1	0.056	0.0825	0.06838	0.2232	0.2719	0.25022		63989	rs16862842	C	0.03041	0.02002	0.0678	0.252		63989	rs16862842	C	0.02535	0.02134	0.0678	0.252		63989	rs6805481	C	0.03661	0.02731	0.056	0.2719		63989	rs16862842	C	0.006849	0.02695	0.0678	0.252		63989	rs16862858	G	0.03234	0.01982	0.0825
64095	2	72206646	72353138		0.0421	0.0421	0.0421	0.02956	0.02956	0.02956		64095	rs4852856	T	0.233	0.2245	0.0421	0.02956		64095	rs4852856	T	0.2408	0.253	0.0421	0.02956		64095	rs4852856	T	0.2402	0.2111	0.0421	0.02956		64095	rs4852856	T	0.1849	0.2305	0.0421	0.02956		64095	rs4852856	T	0.2387	0.2138	0.0421
64137	10	3395527	3421414		-0.0497	-0.0331	-0.0456	0.03796	0.1681	0.067392		64137	rs4881164	G	0.1312	0.1347	-0.0497	0.04018		64137	rs7080295	A	0.1419	0.1067	-0.049	0.03796		64137	rs2065936	T	0.08913	0.1188	-0.0331	0.1681		64137	rs4881164	G	0.1644	0.1347	-0.0497	0.04018		64137	rs12261202	A	0.1036	0.1289	-0.0465
64392	7	148476706	148847178	ZNF425	0.0288	0.0338	0.03214	0.03378	0.07114	0.048198		64392	rs1137432	C	0.3777	0.3613	0.0324	0.04983		64392	rs1137432	C	0.3469	0.3659	0.0324	0.04983		64392	rs13236754	G	0.3952	0.3533	0.0333	0.03641		64392	rs7794500	T	0.4028	0.3735	0.0288	0.07114		64392	rs12540094	G	0.3747	0.3538	0.0338
64437	13	23500567	24602567	SPATA13,SPATA13,ENSG00000273167	0.0208	0.0387	0.02796	0.02973	0.23	0.149892		64437	rs12430286	T	0.307	0.2872	0.0208	0.23		64437	rs12430286	T	0.3062	0.3262	0.0208	0.23		64437	rs12430286	T	0.2675	0.2985	0.0208	0.23		64437	rs7325299	T	0.3082	0.3102	0.0387	0.02973		64437	rs7325299	T	0.2868	0.2464	0.0387
64690	6	141428255	141469948		0.0553	0.0553	0.0553	0.02986	0.02986	0.02986		64690	rs9389870	C	0.09246	0.08185	0.0553	0.02986		64690	rs9389870	C	0.1025	0.06707	0.0553	0.02986		64690	rs9389870	C	0.09358	0.09697	0.0553	0.02986		64690	rs9389870	C	0.06944	0.1189	0.0553	0.02986		64690	rs9389870	C	0.09341	0.08932	0.0553
65011	6	114711584	114783520	HDAC2-AS2	-0.0438	-0.0389	-0.04024	0.03483	0.0597	0.054314		65011	rs10457277	A	0.1616	0.1741	-0.0389	0.0597		65011	rs10457277	A	0.1264	0.1677	-0.0389	0.0597		65011	rs10456892	G	0.164	0.1855	-0.0438	0.03483		65011	rs10457277	A	0.1972	0.1574	-0.0389	0.0597		65011	rs12192949	T	0.1581	0.1796	-0.0407
65063	22	20880884	22550884		0.03	0.0389	0.03356	0.07246	0.1519	0.120124		65063	rs2073449	C	0.1482	0.1735	0.0389	0.07246		65063	rs4145536	T	0.1503	0.189	0.03	0.1519		65063	rs2073449	C	0.2068	0.1693	0.0389	0.07246		65063	rs4145536	T	0.2808	0.1606	0.03	0.1519		65063	rs4145536	T	0.1777	0.1643	0.03
65197	20	15006882	15058882	MACROD2	0.0384	0.0384	0.0384	0.03011	0.03011	0.03011		65197	rs411944	A	0.2979	0.2688	0.0384	0.03011		65197	rs411944	A	0.2626	0.311	0.0384	0.03011		65197	rs411944	A	0.2897	0.2612	0.0384	0.03011		65197	rs411944	A	0.3493	0.2695	0.0384	0.03011		65197	rs411944	A	0.2743	0.2577	0.0384
65320	15	31813550	34028778	RYR3	0.0178	0.0328	0.0298	0.04396	0.2727	0.089708		65320	rs17236525	T	0.4356	0.3806	0.0328	0.04396		65320	rs17236525	T	0.4185	0.4451	0.0328	0.04396		65320	rs17236525	T	0.4196	0.3818	0.0328	0.04396		65320	rs17236525	T	0.4041	0.4311	0.0328	0.04396		65320	rs11856930	G	0.4545	0.4758	0.0178
65545	11	55760165	56003589		0.0406	0.0424	0.04168	0.03918	0.04104	0.039924		65545	rs10896137	C	0.198	0.1796	0.0424	0.03918		65545	rs10896138	A	0.1812	0.1829	0.0406	0.04104		65545	rs10896138	A	0.2237	0.1927	0.0406	0.04104		65545	rs10896137	C	0.1575	0.2096	0.0424	0.03918		65545	rs10896137	C	0.2215	0.2079	0.0424
65655	20	38469951	39036537		0.0559	0.0615	0.05814	0.03345	0.04894	0.042744		65655	rs8124695	A	0.09554	0.07927	0.0615	0.03345		65655	rs8124695	A	0.06882	0.08537	0.0615	0.03345		65655	rs6093338	G	0.06328	0.06788	0.0559	0.04894		65655	rs6093338	G	0.1096	0.07186	0.0559	0.04894		65655	rs6093338	G	0.06211	0.07603	0.0559
65681	14	43070182	43995078		-0.039	-0.0324	-0.0343	0.04406	0.1103	0.08838		65681	rs11157356	C	0.2527	0.2243	-0.0324	0.1103		65681	rs11157356	C	0.1859	0.2073	-0.0324	0.1103		65681	rs1959582	A	0.2	0.2263	-0.039	0.04406		65681	rs11157356	C	0.1096	0.2242	-0.0324	0.1103		65681	rs10083417	A	0.1996	0.2235	-0.0353
65686	17	66758973	69289935		0.0463	0.0582	0.0533	0.03295	0.08282	0.0562		65686	rs6501464	C	0.1047	0.0898	0.0565	0.05171		65686	rs8077285	A	0.07444	0.09451	0.0463	0.08282		65686	rs6501464	C	0.09447	0.08	0.0565	0.05171		65686	rs9896271	T	0.08219	0.07186	0.0582	0.03295		65686	rs12938605	T	0.09599	0.07706	0.049
65731	21	19726751	20808841		-0.0529	-0.0471	-0.04826	0.03039	0.03824	0.03667		65731	rs1977966	C	0.1509	0.1635	-0.0471	0.03824		65731	rs7280885	C	0.1334	0.122	-0.0529	0.03039		65731	rs1977966	C	0.1453	0.1485	-0.0471	0.03824		65731	rs1977966	C	0.1712	0.1377	-0.0471	0.03824		65731	rs1977966	C	0.1381	0.1649	-0.0471
65801	7	47352947	47386422	TNS3	0.0295	0.0325	0.0319	0.03854	0.07278	0.045388		65801	rs2462645	A	0.3982	0.3801	0.0325	0.03854		65801	rs2462645	A	0.4045	0.3872	0.0325	0.03854		65801	rs2462645	A	0.3832	0.3806	0.0325	0.03854		65801	rs2462645	A	0.363	0.4132	0.0325	0.03854		65801	rs17522996	T	0.4145	0.3593	0.0295
65874	10	131216897	131325138	MGMT	0.0387	0.0477	0.04418	0.03046	0.07837	0.047232		65874	rs12256491	T	0.1771	0.1486	0.0406	0.05768		65874	rs12264367	G	0.1342	0.1189	0.0387	0.07837		65874	rs2027136	C	0.1595	0.1267	0.0472	0.03281		65874	rs12268726	T	0.1597	0.1228	0.0477	0.03046		65874	rs12258707	T	0.1557	0.1463	0.0467
65922	12	111134441	112718198	HECTD4	0.0248	0.0507	0.04332	0.05953	0.3697	0.137032		65922	rs10161290	A	0.0966	0.07871	0.0507	0.05953		65922	rs7307862	T	0.1056	0.06442	0.0248	0.3697		65922	rs10850014	G	0.0918	0.09394	0.0486	0.06776		65922	rs11066119	G	0.1111	0.06748	0.0483	0.07897		65922	rs10850023	C	0.08579	0.08797	0.0442
65944	12	66454320	68168053		-0.0349	-0.0297	-0.03262	0.0305	0.07034	0.047168		65944	rs4913255	C	0.3866	0.4024	-0.0297	0.07034		65944	rs4913255	C	0.4045	0.3872	-0.0297	0.07034		65944	rs2014130	G	0.3672	0.4339	-0.0344	0.0305		65944	rs2014130	G	0.411	0.3952	-0.0344	0.0305		65944	rs17674423	T	0.3693	0.3962	-0.0349
66251	15	92451058	94649121	LINC01581	-0.0349	-0.0313	-0.03368	0.03065	0.04404	0.034458		66251	rs1479831	T	0.4893	0.4812	-0.0349	0.03065		66251	rs1479831	T	0.4803	0.4543	-0.0349	0.03065		66251	rs2127470	A	0.483	0.4836	-0.0324	0.0363		66251	rs1479831	T	0.4384	0.4731	-0.0349	0.03065		66251	rs10400909	A	0.4869	0.4543	-0.0313
66268	11	94455522	94810756	SRSF8	0.0188	0.0308	0.02498	0.05356	0.241	0.125392		66268	rs12627	C	0.466	0.4339	0.0251	0.1108		66268	rs655070	T	0.4817	0.4909	0.0308	0.05356		66268	rs581788	T	0.4635	0.4527	0.0188	0.241		66268	rs12627	C	0.4247	0.482	0.0251	0.1108		66268	rs12627	C	0.4968	0.4597	0.0251
66388	14	90944709	91874956	CCDC88C	0.0295	0.0339	0.03302	0.06647	0.1014	0.073456		66388	rs2295882	C	0.2509	0.2239	0.0339	0.06647		66388	rs2295882	C	0.2528	0.2317	0.0339	0.06647		66388	rs2295882	C	0.2424	0.2379	0.0339	0.06647		66388	rs2295882	C	0.226	0.2485	0.0339	0.06647		66388	rs11160004	G	0.2368	0.2621	0.0295
66530	1	215200363	217139677	ESRRG	0.0283	0.0344	0.03182	0.03979	0.08315	0.05509		66530	rs2576212	T	0.3491	0.328	0.0344	0.03979		66530	rs2576225	T	0.3357	0.2988	0.0283	0.08315		66530	rs2576220	A	0.328	0.3545	0.03	0.06468		66530	rs2576212	T	0.3836	0.3473	0.0344	0.03979		66530	rs2576210	T	0.3697	0.3294	0.032
66712	1	117146078	117344555		0.0608	0.0846	0.07508	0.04566	0.1383	0.082716		66712	rs798023	A	0.04204	0.04828	0.0608	0.1383		66712	rs798023	A	0.04494	0.0122	0.0608	0.1383		66712	rs798007	C	0.04278	0.02909	0.0846	0.04566		66712	rs798007	C	0.03425	0.03892	0.0846	0.04566		66712	rs798007	C	0.03733	0.03131	0.0846
66831	7	34366019	34399494	NPSR1-AS1	0.0307	0.0307	0.0307	0.1522	0.1522	0.1522		66831	rs1419810	T	0.1902	0.1713	0.0307	0.1522		66831	rs1419810	T	0.1994	0.1524	0.0307	0.1522		66831	rs1419810	T	0.1729	0.163	0.0307	0.1522		66831	rs1419810	T	0.1944	0.1707	0.0307	0.1522		66831	rs1419810	T	0.1661	0.1547	0.0307
66888	4	154974131	155193581	ENSG00000280241	0.0404	0.0404	0.0404	0.04466	0.04466	0.04466		66888	rs11099935	C	0.2205	0.1984	0.0404	0.04466		66888	rs11099935	C	0.2079	0.1738	0.0404	0.04466		66888	rs11099935	C	0.2023	0.1976	0.0404	0.04466		66888	rs11099935	C	0.1736	0.1946	0.0404	0.04466		66888	rs11099935	C	0.2002	0.2257	0.0404
66899	1	92180039	92472723	BRDT	-0.0405	-0.0347	-0.03812	0.03835	0.07677	0.052522		66899	rs1410583	A	0.1973	0.2206	-0.0351	0.06451		66899	rs6666624	C	0.2051	0.2043	-0.0405	0.03835		66899	rs10875081	T	0.2295	0.2236	-0.0347	0.07677		66899	rs11165947	T	0.2123	0.2169	-0.0399	0.04394		66899	rs10783074	T	0.2023	0.2285	-0.0404
67554	11	117760488	118273019	ATP5MG,ENSG00000285827	-0.0282	-0.0272	-0.0274	0.107	0.1313	0.12644		67554	rs17122154	A	0.2491	0.2766	-0.0272	0.1313		67554	rs17122154	A	0.2528	0.2591	-0.0272	0.1313		67554	rs6589663	A	0.2852	0.2791	-0.0282	0.107		67554	rs17122154	A	0.1918	0.2485	-0.0272	0.1313		67554	rs17122154	A	0.2666	0.3032	-0.0272
67664	3	86345140	86373414		0.0268	0.0344	0.02832	0.03139	0.08364	0.07319		67664	rs1355686	G	0.4533	0.4353	0.0268	0.08364		67664	rs1355686	G	0.4143	0.4512	0.0268	0.08364		67664	rs1512935	C	0.4947	0.46	0.0344	0.03139		67664	rs1355686	G	0.4507	0.4132	0.0268	0.08364		67664	rs1355686	G	0.4219	0.4188	0.0268
67802	11	125569649	126065861		0.0345	0.0345	0.0345	0.0462	0.04682	0.046324		67802	rs530587	A	0.2821	0.2611	0.0345	0.0462		67802	rs530587	A	0.2963	0.2287	0.0345	0.0462		67802	rs530587	A	0.2959	0.2491	0.0345	0.0462		67802	rs530587	A	0.2603	0.2635	0.0345	0.0462		67802	rs493083	G	0.27	0.271	0.0345
68027	5	107233791	107276507	FBXL17	-0.0425	-0.0291	-0.03982	0.03156	0.1258	0.050408		68027	rs1433050	C	0.1857	0.2116	-0.0425	0.03156		68027	rs1433050	C	0.2008	0.2256	-0.0425	0.03156		68027	rs1433050	C	0.1979	0.2242	-0.0425	0.03156		68027	rs1433050	C	0.2778	0.2394	-0.0425	0.03156		68027	rs10069340	G	0.2239	0.2258	-0.0291
68082	2	214616537	214897080	SPAG16	0.0568	0.0642	0.06272	0.03159	0.0452	0.034312		68082	rs11901290	C	0.09567	0.08389	0.0642	0.03159		68082	rs11901290	C	0.08989	0.07927	0.0642	0.03159		68082	rs9288485	G	0.08378	0.07636	0.0568	0.0452		68082	rs11901290	C	0.03425	0.09281	0.0642	0.03159		68082	rs11901290	C	0.08017	0.06362	0.0642
68474	13	45611703	46713702	LCP1,CPB2-AS1	0.0312	0.0396	0.03444	0.03408	0.0842	0.06586		68474	rs1980832	C	0.2571	0.2278	0.0351	0.06341		68474	rs1980832	C	0.2711	0.2591	0.0351	0.06341		68474	rs9316187	A	0.2683	0.2315	0.0312	0.0842		68474	rs9316187	A	0.2466	0.2575	0.0312	0.0842		68474	rs9316186	G	0.2468	0.2066	0.0396
68504	3	148835753	150318443		-0.0318	-0.0254	-0.02796	0.07695	0.1266	0.10674		68504	rs6788799	C	0.2589	0.2794	-0.0318	0.07695		68504	rs6792168	C	0.2837	0.375	-0.0254	0.1266		68504	rs6788799	C	0.2843	0.2776	-0.0318	0.07695		68504	rs6792168	C	0.2671	0.3293	-0.0254	0.1266		68504	rs6792168	C	0.3007	0.3283	-0.0254
68773	20	45872639	46438075		-0.0366	-0.0328	-0.03356	0.03192	0.05423	0.049768		68773	rs4810702	C	0.2955	0.3119	-0.0328	0.05423		68773	rs4810702	C	0.2781	0.2774	-0.0328	0.05423		68773	rs6122616	T	0.3048	0.3424	-0.0366	0.03192		68773	rs4810702	C	0.3288	0.3114	-0.0328	0.05423		68773	rs4810702	C	0.2881	0.3056	-0.0328
68777	3	113341661	114824351	SIDT1	-0.0297	-0.0284	-0.02892	0.07126	0.09596	0.08608		68777	rs2895415	G	0.3166	0.332	-0.0297	0.07126		68777	rs2895415	G	0.3188	0.3293	-0.0297	0.07126		68777	rs11718013	C	0.317	0.3485	-0.0284	0.09596		68777	rs11718013	C	0.3151	0.3383	-0.0284	0.09596		68777	rs11718013	C	0.3553	0.3459	-0.0284
68871	1	70951063	71197126	LINC01788	-0.0282	-0.0225	-0.02364	0.07651	0.1685	0.150102		68871	rs1855648	C	0.3688	0.3952	-0.0225	0.1685		68871	rs1932063	A	0.389	0.3841	-0.0282	0.07651		68871	rs1855648	C	0.3982	0.3961	-0.0225	0.1685		68871	rs1855648	C	0.4521	0.4192	-0.0225	0.1685		68871	rs1855648	C	0.3891	0.4182	-0.0225
68977	5	112989901	113025555		-0.0321	-0.0318	-0.03192	0.03881	0.04126	0.04028		68977	rs2972664	A	0.4025	0.4329	-0.0321	0.03881		68977	rs2972664	A	0.4691	0.4482	-0.0321	0.03881		68977	rs1864067	A	0.417	0.4491	-0.0318	0.04126		68977	rs1864067	A	0.4521	0.4341	-0.0318	0.04126		68977	rs1864067	A	0.4468	0.4238	-0.0318
69003	13	80087302	81189301		0.0402	0.0402	0.0402	0.03204	0.03204	0.03204		69003	rs10507911	T	0.2232	0.2057	0.0402	0.03204		69003	rs10507911	T	0.1994	0.2165	0.0402	0.03204		69003	rs10507911	T	0.2255	0.2442	0.0402	0.03204		69003	rs10507911	T	0.2397	0.2078	0.0402	0.03204		69003	rs10507911	T	0.2305	0.1939	0.0402
69094	9	89424534	90234714	DAPK1	0.0371	0.0525	0.041	0.03209	0.1085	0.08959		69094	rs11141914	A	0.1205	0.1197	0.0371	0.1085		69094	rs13288561	T	0.1236	0.06707	0.0525	0.03209		69094	rs11141914	A	0.1399	0.1189	0.0371	0.1085		69094	rs11141914	A	0.08904	0.08788	0.0371	0.1085		69094	rs10868639	G	0.1293	0.1297	0.0412
69209	11	48242832	48326773	OR4X1	0.0233	0.0261	0.02554	0.1072	0.1424	0.11424		69209	rs10838852	C	0.4482	0.4157	0.0261	0.1072		69209	rs1483123	G	0.4424	0.4024	0.0233	0.1424		69209	rs10838852	C	0.4474	0.4217	0.0261	0.1072		69209	rs10838852	C	0.4795	0.4608	0.0261	0.1072		69209	rs10838852	C	0.4537	0.424	0.0261
69223	5	169041718	169096774	DOCK2	-0.0339	-0.0312	-0.03318	0.03375	0.04972	0.04139		69223	rs7721990	T	0.375	0.3703	-0.0336	0.04116		69223	rs7721990	T	0.3722	0.378	-0.0336	0.04116		69223	rs9313467	A	0.3672	0.3818	-0.0312	0.04972		69223	rs7721990	T	0.2808	0.4192	-0.0336	0.04116		69223	rs6879467	A	0.3796	0.4167	-0.0339
69244	6	78011358	78068077		0.0615	0.0739	0.06646	0.03217	0.08709	0.065122		69244	rs6910130	T	0.05804	0.04656	0.0615	0.08709		69244	rs9448057	C	0.04167	0.06098	0.0739	0.03217		69244	rs9448057	C	0.06239	0.04788	0.0739	0.03217		69244	rs6910130	T	0.04795	0.06287	0.0615	0.08709		69244	rs6910130	T	0.05943	0.04705	0.0615
69561	3	61925208	61957688	PTPRG	0.0351	0.0442	0.03968	0.03234	0.06317	0.046402		69561	rs1479394	C	0.225	0.2045	0.0397	0.0455		69561	rs1479394	C	0.2037	0.1555	0.0397	0.0455		69561	rs1479394	C	0.1845	0.2021	0.0397	0.0455		69561	rs1904347	G	0.2329	0.1988	0.0351	0.06317		69561	rs1479392	G	0.2017	0.2157	0.0442
69777	6	115589671	115886352		-0.027	-0.0227	-0.02516	0.09598	0.1883	0.139516		69777	rs1412034	T	0.2804	0.3154	-0.0227	0.1883		69777	rs1412034	T	0.2949	0.3079	-0.0227	0.1883		69777	rs7759765	C	0.3518	0.3174	-0.027	0.1091		69777	rs4946087	T	0.2808	0.3772	-0.0269	0.09598		69777	rs11966892	C	0.2998	0.3333	-0.0265
69882	11	13899837	13940036		0.0226	0.0388	0.02612	0.03249	0.1924	0.155358		69882	rs4471396	G	0.2857	0.2583	0.0226	0.1924		69882	rs4471396	G	0.2416	0.2713	0.0226	0.1924		69882	rs2271154	T	0.2705	0.2382	0.0388	0.03249		69882	rs4471396	G	0.226	0.2365	0.0226	0.1924		69882	rs10832139	G	0.2652	0.2686	0.024
70074	10	3180689	3191072	PITRM1,ENSG00000278419	-0.0376	-0.025	-0.03382	0.03259	0.1604	0.06468		70074	rs2388558	A	0.2571	0.2727	-0.036	0.0385		70074	rs4881109	G	0.2317	0.3049	-0.0376	0.03259		70074	rs3814593	T	0.2576	0.3042	-0.025	0.1604		70074	rs4881109	G	0.226	0.2635	-0.0376	0.03259		70074	rs4880595	G	0.2518	0.2545	-0.0329
70248	22	40567973	42241372	SREBF2	0.0418	0.0456	0.04484	0.03268	0.05114	0.036372		70248	rs7287886	C	0.1438	0.1498	0.0456	0.03268		70248	rs7287886	C	0.1882	0.1311	0.0456	0.03268		70248	rs7287886	C	0.1506	0.1333	0.0456	0.03268		70248	rs7287886	C	0.1781	0.2048	0.0456	0.03268		70248	rs2255957	A	0.1649	0.1404	0.0418
70279	10	118442911	118452921	HSPA12A	0.0205	0.0205	0.0205	0.289	0.289	0.289		70279	rs12263233	C	0.2161	0.1959	0.0205	0.289		70279	rs12263233	C	0.198	0.1951	0.0205	0.289		70279	rs12263233	C	0.2032	0.2027	0.0205	0.289		70279	rs12263233	C	0.2192	0.1747	0.0205	0.289		70279	rs12263233	C	0.227	0.1918	0.0205
70301	12	50917874	52631607	KRT7	0.0308	0.0331	0.03172	0.09181	0.1175	0.107224		70301	rs6580870	A	0.2018	0.1839	0.0331	0.09181		70301	rs6580870	A	0.2388	0.1738	0.0331	0.09181		70301	rs1902768	A	0.2175	0.1933	0.0308	0.1175		70301	rs1902768	A	0.2466	0.2156	0.0308	0.1175		70301	rs1902768	A	0.2057	0.1851	0.0308
70375	1	148445751	150420439	PRPF3	-0.0454	-0.0071	-0.01836	0.03275	0.7582	0.50621		70375	rs11205362	A	0.1062	0.117	-0.0071	0.7582		70375	rs11587682	T	0.118	0.1402	-0.0159	0.5144		70375	rs11588837	G	0.1366	0.1383	-0.0454	0.03275		70375	rs942453	G	0.08333	0.1273	-0.015	0.5081		70375	rs11577751	G	0.1071	0.1254	-0.0084
70641	18	25786830	27735777		0.0267	0.033	0.0301	0.1239	0.2021	0.15734		70641	rs7243787	T	0.1839	0.1624	0.032	0.1239		70641	rs9959731	A	0.1966	0.1626	0.0267	0.2021		70641	rs12965207	T	0.1524	0.1503	0.033	0.1295		70641	rs2015085	C	0.1389	0.1407	0.0294	0.1656		70641	rs2015085	C	0.1458	0.1232	0.0294
70662	5	36887895	37007629	NIPBL	0.0286	0.032	0.03112	0.04507	0.06451	0.05045		70662	rs159753	C	0.4679	0.4517	0.031	0.05253		70662	rs292182	A	0.4185	0.4177	0.0286	0.06451		70662	rs158622	C	0.492	0.4533	0.032	0.04507		70662	rs158622	C	0.4932	0.4611	0.032	0.04507		70662	rs158622	C	0.435	0.4462	0.032
70804	5	158905051	158972473	ENSG00000249738	0.0466	0.0466	0.0466	0.03298	0.03298	0.03298		70804	rs4921508	G	0.1696	0.143	0.0466	0.03298		70804	rs4921508	G	0.1419	0.1616	0.0466	0.03298		70804	rs4921508	G	0.172	0.1364	0.0466	0.03298		70804	rs4921508	G	0.1027	0.1707	0.0466	0.03298		70804	rs4921508	G	0.1583	0.1547	0.0466
70849	4	85363428	85598728		0.0232	0.0395	0.03476	0.033	0.1836	0.069316		70849	rs1444957	C	0.2643	0.2439	0.0359	0.0481		70849	rs1444957	C	0.2458	0.2378	0.0359	0.0481		70849	rs1017559	G	0.2513	0.2206	0.0395	0.033		70849	rs1444975	G	0.3028	0.3117	0.0232	0.1836		70849	rs1444953	A	0.2466	0.2339	0.0393
71053	17	39716886	42361360		0.0348	0.0348	0.0348	0.03311	0.03311	0.03311		71053	rs2879165	C	0.4116	0.3841	0.0348	0.03311		71053	rs2879165	C	0.4087	0.3354	0.0348	0.03311		71053	rs2879165	C	0.385	0.3703	0.0348	0.03311		71053	rs2879165	C	0.3904	0.3506	0.0348	0.03311		71053	rs2879165	C	0.3894	0.3596	0.0348
71067	14	85864837	86816438		-0.0253	-0.021	-0.02278	0.1129	0.1935	0.15554		71067	rs8007032	A	0.4312	0.4207	-0.0233	0.1389		71067	rs8007032	A	0.3876	0.4634	-0.0233	0.1389		71067	rs1505150	C	0.4358	0.4127	-0.021	0.1935		71067	rs1505150	C	0.4167	0.4367	-0.021	0.1935		71067	rs1505185	A	0.3806	0.4236	-0.0253
71219	6	125567330	125612985	HDDC2,TPD52L1	-0.0396	-0.0379	-0.03892	0.0332	0.04824	0.039216		71219	rs9321026	G	0.2357	0.2431	-0.0379	0.04824		71219	rs9321026	G	0.2191	0.2134	-0.0379	0.04824		71219	rs7761005	G	0.1964	0.2291	-0.0396	0.0332		71219	rs7761005	G	0.2534	0.2349	-0.0396	0.0332		71219	rs7761005	G	0.2132	0.2536	-0.0396
71654	1	48216786	48480638	TRABD2B	-0.04	-0.0047	-0.02192	0.03343	0.7822	0.355806		71654	rs10888594	T	0.2938	0.3143	-0.0237	0.1822		71654	rs12137714	C	0.2107	0.2744	-0.035	0.064		71654	rs12080061	T	0.2527	0.2679	-0.04	0.03343		71654	rs6676465	G	0.3562	0.3084	-0.0047	0.7822		71654	rs11205431	T	0.3145	0.3165	-0.0062
71693	4	180836183	181073177	ENSG00000287083	-0.0445	-0.0344	-0.03844	0.07039	0.1601	0.124216		71693	rs4861822	G	0.1099	0.123	-0.0445	0.07039		71693	rs4861822	G	0.1194	0.09816	-0.0445	0.07039		71693	rs1545669	A	0.1292	0.1133	-0.0344	0.1601		71693	rs1545669	A	0.1301	0.1287	-0.0344	0.1601		71693	rs1545669	A	0.1105	0.1288	-0.0344
72130	15	49708650	51990247	SCG3	0.0328	0.0389	0.03508	0.03461	0.06782	0.055302		72130	rs1456295	C	0.2286	0.2433	0.0343	0.06464		72130	rs1840707	G	0.2346	0.2226	0.0328	0.06782		72130	rs12324531	T	0.2692	0.2291	0.0389	0.03461		72130	rs2622770	A	0.2183	0.2284	0.0337	0.0619		72130	rs12901452	T	0.2471	0.2231	0.0357
72238	3	125243742	126729053		0.0375	0.042	0.0402	0.04356	0.0567	0.048816		72238	rs1839063	T	0.2143	0.2118	0.042	0.04356		72238	rs9841525	T	0.2022	0.2104	0.0375	0.0567		72238	rs9841525	T	0.2121	0.1848	0.0375	0.0567		72238	rs1839063	T	0.2192	0.2126	0.042	0.04356		72238	rs1839063	T	0.2321	0.2083	0.042
72264	8	97169327	97250226		0.0244	0.0335	0.03168	0.03499	0.1273	0.053452		72264	rs2245832	A	0.3775	0.3586	0.0335	0.03499		72264	rs2514527	C	0.3933	0.3872	0.0244	0.1273		72264	rs2245832	A	0.3636	0.3582	0.0335	0.03499		72264	rs2245832	A	0.411	0.3683	0.0335	0.03499		72264	rs2245832	A	0.3864	0.3578	0.0335
72857	8	9197661	9249850	ENSG00000248538	-0.0341	-0.0293	-0.03026	0.03404	0.06757	0.060864		72857	rs958374	C	0.4812	0.4723	-0.0293	0.06757		72857	rs958374	C	0.4775	0.4421	-0.0293	0.06757		72857	rs12550519	T	0.4964	0.483	-0.0341	0.03404		72857	rs958374	C	0.4028	0.4788	-0.0293	0.06757		72857	rs958374	C	0.4989	0.461	-0.0293
72931	4	20341432	20732334	PACRGL,KCNIP4	0.023	0.0517	0.03496	0.06298	0.3781	0.240292		72931	rs16869915	C	0.1174	0.09588	0.023	0.3781		72931	rs7688805	C	0.07163	0.06098	0.0517	0.06298		72931	rs7688805	C	0.07219	0.09152	0.0517	0.06298		72931	rs9291412	G	0.1233	0.09281	0.0242	0.3487		72931	rs9291412	G	0.09293	0.1052	0.0242
73415	12	113862420	115380393		-0.0371	-0.0181	-0.03304	0.03435	0.2931	0.087374		73415	rs10744835	A	0.3277	0.3442	-0.0371	0.03435		73415	rs10850408	T	0.3497	0.4116	-0.0181	0.2931		73415	rs10850407	G	0.3155	0.3295	-0.0358	0.04072		73415	rs10744835	A	0.3014	0.2784	-0.0371	0.03435		73415	rs10744835	A	0.3013	0.2996	-0.0371
73703	6	22755139	22863298	ENSG00000233358	0.0332	0.0333	0.03322	0.03451	0.03693	0.034994		73703	rs4466239	A	0.4027	0.3797	0.0333	0.03693		73703	rs4510658	A	0.3455	0.3994	0.0332	0.03451		73703	rs4510658	A	0.3663	0.3726	0.0332	0.03451		73703	rs4510658	A	0.363	0.4277	0.0332	0.03451		73703	rs4510658	A	0.3988	0.3649	0.0332
73922	11	83700584	84022936	DLG2	0.0336	0.0336	0.0336	0.03462	0.03462	0.03462		73922	rs7121214	A	0.356	0.333	0.0336	0.03462		73922	rs7121214	A	0.3859	0.3232	0.0336	0.03462		73922	rs7121214	A	0.3688	0.343	0.0336	0.03462		73922	rs7121214	A	0.3014	0.4401	0.0336	0.03462		73922	rs7121214	A	0.3668	0.345	0.0336
73938	10	63981236	64329247	ENSG00000285551,ENSG00000285837	0.0305	0.0445	0.03674	0.0676	0.22	0.14099		73938	rs10995208	C	0.1223	0.1038	0.0305	0.22		73938	rs4508090	A	0.1292	0.08232	0.0445	0.0676		73938	rs10995208	C	0.1176	0.1115	0.0305	0.22		73938	rs4746447	T	0.137	0.1355	0.0403	0.08065		73938	rs10995213	G	0.1121	0.1064	0.0379
74017	5	55929388	55965145		0.0379	0.0379	0.0379	0.04649	0.04649	0.04649		74017	rs10940509	A	0.2209	0.2044	0.0379	0.04649		74017	rs10940509	A	0.2065	0.2073	0.0379	0.04649		74017	rs10940509	A	0.2415	0.1982	0.0379	0.04649		74017	rs10940509	A	0.2123	0.2186	0.0379	0.04649		74017	rs10940509	A	0.202	0.2111	0.0379
74023	15	72919012	75131959	ULK3	-0.0334	-0.0325	-0.0331	0.03468	0.04221	0.036982		74023	rs2290572	A	0.3904	0.4145	-0.0325	0.04221		74023	rs12898397	T	0.3582	0.3774	-0.0328	0.03866		74023	rs936227	A	0.3922	0.397	-0.0334	0.03468		74023	rs936227	A	0.3889	0.4192	-0.0334	0.03468		74023	rs936227	A	0.3729	0.4095	-0.0334
74232	2	100801116	101439596		0.0173	0.0236	0.01964	0.2392	0.4091	0.33636		74232	rs3811561	A	0.2116	0.1933	0.02	0.3122		74232	rs6542992	T	0.1952	0.1433	0.0173	0.4091		74232	rs3811561	A	0.172	0.1685	0.02	0.3122		74232	rs6542992	T	0.2466	0.1939	0.0173	0.4091		74232	rs10172146	A	0.1977	0.1655	0.0236
74608	3	29477393	29510365	RBMS3,ENSG00000283563	-0.036	-0.013	-0.02588	0.03498	0.445	0.169552		74608	rs9310901	A	0.3366	0.3525	-0.0222	0.1664		74608	rs9855960	C	0.3085	0.2561	-0.036	0.03498		74608	rs9310901	A	0.3333	0.3521	-0.0222	0.1664		74608	rs9855960	C	0.3493	0.3084	-0.036	0.03498		74608	rs12495100	C	0.2781	0.2862	-0.013
74752	5	93742412	93800022	KIAA0825	0.025	0.0317	0.02748	0.04144	0.1169	0.087944		74752	rs1861806	T	0.4732	0.4451	0.025	0.1169		74752	rs308203	G	0.4635	0.3933	0.0317	0.04144		74752	rs1861806	T	0.4831	0.4491	0.025	0.1169		74752	rs1861806	T	0.3611	0.4939	0.025	0.1169		74752	rs10463188	A	0.4741	0.4569	0.0307
74761	13	92849517	94051516	GPC6	0.0271	0.0274	0.02722	0.09745	0.1049	0.10043		74761	rs2762110	C	0.3455	0.3243	0.0271	0.09745		74761	rs2762110	C	0.3301	0.2896	0.0271	0.09745		74761	rs2762110	C	0.3431	0.3303	0.0271	0.09745		74761	rs2762111	T	0.3169	0.3204	0.0274	0.1049		74761	rs2762111	T	0.3656	0.3392	0.0274
74783	4	10747307	11182041		0.0519	0.0553	0.05258	0.06044	0.07958	0.075752		74783	rs10034712	T	0.07961	0.07539	0.0519	0.07958		74783	rs10034712	T	0.09691	0.05793	0.0519	0.07958		74783	rs11736184	A	0.08556	0.07212	0.0553	0.06044		74783	rs10034712	T	0.09589	0.07485	0.0519	0.07958		74783	rs10034712	T	0.07664	0.06284	0.0519
74945	1	232765859	234701910		0.0559	0.0592	0.05656	0.1315	0.1846	0.17398		74945	rs7531368	T	0.05296	0.04236	0.0559	0.1846		74945	rs9970996	A	0.05899	0.05183	0.0592	0.1315		74945	rs7531368	T	0.05	0.04258	0.0559	0.1846		74945	rs7531368	T	0.03425	0.04518	0.0559	0.1846		74945	rs7531368	T	0.05326	0.04057	0.0559
75048	18	53945237	55794239	NEDD4L	-0.0307	-0.0307	-0.0307	0.09368	0.09368	0.09368		75048	rs4940646	G	0.2393	0.2594	-0.0307	0.09368		75048	rs4940646	G	0.2289	0.2287	-0.0307	0.09368		75048	rs4940646	G	0.2299	0.26	-0.0307	0.09368		75048	rs4940646	G	0.226	0.2126	-0.0307	0.09368		75048	rs4940646	G	0.2437	0.2576	-0.0307
75423	11	46937611	47151897	C11orf49	-0.0508	-0.0442	-0.04754	0.06036	0.1212	0.087148		75423	rs17790336	T	0.07946	0.09424	-0.0442	0.1212		75423	rs59613483	C	0.07444	0.09756	-0.0508	0.06036		75423	rs12576839	T	0.09091	0.09163	-0.0465	0.1		75423	rs17790390	A	0.1164	0.06587	-0.0481	0.07709		75423	rs17790390	A	0.07597	0.09515	-0.0481
75580	5	149273253	149293060	PDE6A	-0.0285	-0.0285	-0.0285	0.08195	0.08195	0.08195		75580	rs30825	G	0.2946	0.3215	-0.0285	0.08195		75580	rs30825	G	0.3244	0.3628	-0.0285	0.08195		75580	rs30825	G	0.3116	0.3236	-0.0285	0.08195		75580	rs30825	G	0.4041	0.3413	-0.0285	0.08195		75580	rs30825	G	0.3275	0.3524	-0.0285
75800	20	40312545	40884676	PTPRT	-0.0259	-0.0195	-0.02372	0.09782	0.2093	0.135764		75800	rs1883378	A	0.433	0.439	-0.0259	0.09782		75800	rs727336	T	0.4031	0.4726	-0.0229	0.1544		75800	rs1984399	A	0.4027	0.4121	-0.0195	0.2093		75800	rs2206169	A	0.4795	0.4491	-0.0248	0.1132		75800	rs2143008	A	0.4083	0.4541	-0.0255
76294	8	100024447	100093623	VPS13B-DT	-0.0318	-0.0318	-0.0318	0.1069	0.1069	0.1069		76294	rs4510823	G	0.1866	0.2068	-0.0318	0.1069		76294	rs4510823	G	0.2163	0.2165	-0.0318	0.1069		76294	rs4510823	G	0.1854	0.2036	-0.0318	0.1069		76294	rs4510823	G	0.1712	0.197	-0.0318	0.1069		76294	rs4510823	G	0.2238	0.2	-0.0318
76391	5	65768007	65811825		0.0248	0.0265	0.02616	0.09031	0.1145	0.095148		76391	rs1962397	C	0.3973	0.3801	0.0265	0.09031		76391	rs1962397	C	0.3806	0.3476	0.0265	0.09031		76391	rs4395597	A	0.4224	0.3868	0.0248	0.1145		76391	rs1962397	C	0.3014	0.3802	0.0265	0.09031		76391	rs1962397	C	0.3953	0.395	0.0265
76405	4	37889519	38213124		0.0318	0.0318	0.0318	0.03611	0.03611	0.03611		76405	rs11096936	G	0.4938	0.4728	0.0318	0.03611		76405	rs11096936	G	0.4733	0.4573	0.0318	0.03611		76405	rs11096936	G	0.4982	0.4606	0.0318	0.03611		76405	rs11096936	G	0.4178	0.4699	0.0318	0.03611		76405	rs11096936	G	0.4492	0.4645	0.0318
76623	18	54305551	56154571	ALPK2	-0.0374	-0.0221	-0.02634	0.03602	0.2154	0.157984		76623	rs4365374	G	0.2688	0.3008	-0.0221	0.2154		76623	rs4365374	G	0.3216	0.2835	-0.0221	0.2154		76623	rs4365374	G	0.2727	0.2848	-0.0221	0.2154		76623	rs2001517	A	0.2671	0.2545	-0.0374	0.03602		76623	rs12606449	C	0.2668	0.3065	-0.028
76725	3	29252990	29286512	RBMS3,RBMS3-AS3,ENSG00000283563	0.042	0.0471	0.04302	0.04834	0.07353	0.068492		76725	rs2196556	A	0.142	0.1247	0.042	0.07353		76725	rs2196556	A	0.1278	0.1341	0.042	0.07353		76725	rs2196556	A	0.1292	0.1121	0.042	0.07353		76725	rs2196556	A	0.1849	0.08084	0.042	0.07353		76725	rs9310887	G	0.1424	0.1261	0.0471
76934	6	41243740	41372555	TREM1	0.0278	0.0328	0.03104	0.04035	0.06978	0.050182		76934	rs2234246	T	0.4777	0.4878	0.0328	0.04035		76934	rs2234246	T	0.4522	0.4604	0.0328	0.04035		76934	rs2395771	A	0.4884	0.4618	0.0278	0.06978		76934	rs2234246	T	0.3904	0.5	0.0328	0.04035		76934	rs1817537	G	0.4799	0.4649	0.029
77013	19	22501476	22709636	ZNF98,ENSG00000260599	-0.0338	-0.0338	-0.0338	0.05179	0.05179	0.05179		77013	rs1216115	G	0.2812	0.2594	-0.0338	0.05179		77013	rs1216115	G	0.2331	0.2652	-0.0338	0.05179		77013	rs1216115	G	0.2411	0.2743	-0.0338	0.05179		77013	rs1216115	G	0.2808	0.2665	-0.0338	0.05179		77013	rs1216115	G	0.2629	0.3005	-0.0338
77107	7	42141121	42174596	GLI3	-0.0379	-0.0379	-0.0379	0.03628	0.03628	0.03628		77107	rs6974655	T	0.2643	0.2888	-0.0379	0.03628		77107	rs6974655	T	0.2753	0.2515	-0.0379	0.03628		77107	rs6974655	T	0.2674	0.297	-0.0379	0.03628		77107	rs6974655	T	0.2808	0.259	-0.0379	0.03628		77107	rs6974655	T	0.2661	0.3052	-0.0379
77294	6	160206178	160304876		0.0282	0.0411	0.03648	0.05504	0.1671	0.089026		77294	rs6924573	G	0.1786	0.1628	0.0377	0.07433		77294	rs6924573	G	0.1685	0.1677	0.0377	0.07433		77294	rs6924573	G	0.1551	0.1729	0.0377	0.07433		77294	rs9365111	G	0.1575	0.1545	0.0282	0.1671		77294	rs220737	A	0.1816	0.1582	0.0411
77900	9	29709806	29739205		0.0198	0.0362	0.02824	0.03669	0.2544	0.123018		77900	rs13285631	G	0.3116	0.2749	0.0284	0.108		77900	rs928636	G	0.2803	0.2927	0.0362	0.03669		77900	rs13290193	A	0.3077	0.2649	0.0198	0.2544		77900	rs13285631	G	0.2945	0.2784	0.0284	0.108		77900	rs13285631	G	0.2785	0.293	0.0284
77939	8	59390540	59553094		0.0249	0.0249	0.0249	0.1464	0.1464	0.1464		77939	rs6471722	A	0.2875	0.2694	0.0249	0.1464		77939	rs6471722	A	0.2907	0.2287	0.0249	0.1464		77939	rs6471722	A	0.2886	0.2815	0.0249	0.1464		77939	rs6471722	A	0.2671	0.2681	0.0249	0.1464		77939	rs6471722	A	0.2732	0.2482	0.0249
78013	15	52541477	54792734	UNC13C	0.0154	0.0224	0.0189	0.1542	0.3482	0.24008		78013	rs1356859	T	0.4375	0.4185	0.0191	0.2298		78013	rs8023474	T	0.4129	0.3436	0.0224	0.1542		78013	rs2414308	A	0.3877	0.3885	0.0185	0.2384		78013	rs1356859	T	0.4315	0.4096	0.0191	0.2298		78013	rs12148262	C	0.3708	0.3682	0.0154
78056	1	8252297	8329710		-0.038	-0.034	-0.0356	0.04397	0.098	0.076388		78056	rs4301655	A	0.225	0.2445	-0.038	0.04397		78056	rs4301655	A	0.1952	0.2012	-0.038	0.04397		78056	rs2661869	C	0.1836	0.2027	-0.034	0.098		78056	rs2661869	C	0.2397	0.2152	-0.034	0.098		78056	rs2661869	C	0.2042	0.2325	-0.034
78245	14	94460547	95390794		-0.033	-0.033	-0.033	0.09197	0.09197	0.09197		78245	rs3861665	G	0.1774	0.1996	-0.033	0.09197		78245	rs3861665	G	0.1854	0.1707	-0.033	0.09197		78245	rs3861665	G	0.1875	0.1731	-0.033	0.09197		78245	rs3861665	G	0.2534	0.1766	-0.033	0.09197		78245	rs3861665	G	0.1667	0.1986	-0.033
78261	22	41524217	43299294	PACSIN2	0.0176	0.023	0.02046	0.1344	0.2581	0.19406		78261	rs2899365	T	0.483	0.4656	0.0218	0.1733		78261	rs5758972	T	0.4972	0.4726	0.0176	0.2581		78261	rs1807591	A	0.4474	0.4352	0.0223	0.1464		78261	rs5758972	T	0.4589	0.5	0.0176	0.2581		78261	rs1076117	A	0.4572	0.491	0.023
78798	7	52701022	52718451		-0.0352	-0.0314	-0.03246	0.03718	0.05325	0.04838		78798	rs1620792	G	0.3107	0.3196	-0.0319	0.05049		78798	rs1620792	G	0.3118	0.3963	-0.0319	0.05049		78798	rs1406529	A	0.3156	0.3587	-0.0314	0.05325		78798	rs1620792	G	0.3219	0.3879	-0.0319	0.05049		78798	rs1442261	T	0.3492	0.3158	-0.0352
78822	13	90318027	91568390		-0.035	-0.0252	-0.03098	0.03719	0.1191	0.069134		78822	rs1041691	C	0.3143	0.3271	-0.035	0.03719		78822	rs928647	T	0.2823	0.3506	-0.0323	0.05905		78822	rs1041691	C	0.3191	0.3576	-0.035	0.03719		78822	rs723346	C	0.3562	0.3323	-0.0252	0.1191		78822	rs12583307	G	0.3174	0.3253	-0.0274
78976	15	31829188	34041896	RYR3	0.0343	0.0343	0.0343	0.03727	0.03727	0.03727		78976	rs12440440	A	0.3295	0.3099	0.0343	0.03727		78976	rs12440440	A	0.3511	0.3902	0.0343	0.03727		78976	rs12440440	A	0.3449	0.3152	0.0343	0.03727		78976	rs12440440	A	0.3082	0.3473	0.0343	0.03727		78976	rs12440440	A	0.3423	0.3327	0.0343
79070	7	135611121	135971714	ENSG00000232053	-0.033	-0.0227	-0.0251	0.06609	0.2001	0.166578		79070	rs6975667	T	0.2545	0.2761	-0.0227	0.2001		79070	rs6975667	T	0.2823	0.2561	-0.0227	0.2001		79070	rs6975667	T	0.2906	0.2939	-0.0227	0.2001		79070	rs9801179	G	0.4178	0.3623	-0.033	0.06609		79070	rs2701016	A	0.2695	0.3259	-0.0244
79848	13	112304134	113256133		-0.032	-0.032	-0.032	0.03775	0.03775	0.03775		79848	rs1952109	G	0.4955	0.459	-0.032	0.03775		79848	rs1952109	G	0.4649	0.4451	-0.032	0.03775		79848	rs1952109	G	0.4598	0.4921	-0.032	0.03775		79848	rs1952109	G	0.4795	0.4518	-0.032	0.03775		79848	rs1952109	G	0.4911	0.4659	-0.032
79873	4	57540497	57871203	POLR2B	0.028	0.0348	0.03266	0.03777	0.1176	0.062796		79873	rs1625691	C	0.3098	0.3149	0.0335	0.05287		79873	rs1625691	C	0.2963	0.2317	0.0335	0.05287		79873	rs1625691	C	0.3405	0.3079	0.0335	0.05287		79873	rs1718837	C	0.2603	0.2695	0.028	0.1176		79873	rs1277287	C	0.274	0.2846	0.0348
79958	8	80706953	80869508	ENSG00000249328,LINC01607	-0.0318	-0.0318	-0.0318	0.0424	0.0424	0.0424		79958	rs2920949	A	0.3589	0.3914	-0.0318	0.0424		79958	rs2920949	A	0.3701	0.4632	-0.0318	0.0424		79958	rs2920949	A	0.3973	0.4034	-0.0318	0.0424		79958	rs2920949	A	0.3493	0.3916	-0.0318	0.0424		79958	rs2920949	A	0.3854	0.3951	-0.0318
80080	6	34255476	34451544	RPS10-NUDT3,NUDT3	-0.0399	-0.0321	-0.03608	0.04284	0.09695	0.069552		80080	rs206936	G	0.1929	0.2217	-0.0339	0.08161		80080	rs3913010	G	0.2008	0.1707	-0.0346	0.08352		80080	rs3798560	C	0.2009	0.2159	-0.0399	0.04284		80080	rs3798560	C	0.2397	0.189	-0.0399	0.04284		80080	rs206942	C	0.1942	0.2177	-0.0321
80246	9	31894764	32059777		-0.042	-0.0323	-0.0361	0.03806	0.1132	0.077226		80246	rs7024321	T	0.1857	0.1996	-0.0351	0.08322		80246	rs7024321	T	0.2079	0.186	-0.0351	0.08322		80246	rs10813663	A	0.1765	0.1909	-0.036	0.06843		80246	rs439005	G	0.137	0.2169	-0.042	0.03806		80246	rs10813657	T	0.1746	0.1541	-0.0323
80420	12	66323355	68075851		0.0212	0.0356	0.02984	0.03804	0.1958	0.101144		80420	rs4913355	A	0.3491	0.332	0.0212	0.1958		80420	rs4913355	A	0.3511	0.3689	0.0212	0.1958		80420	rs10878640	T	0.3146	0.3127	0.0356	0.03804		80420	rs10878640	T	0.3288	0.3343	0.0356	0.03804		80420	rs10878640	T	0.3401	0.2949	0.0356
80460	15	84341565	86540917		-0.0356	-0.0267	-0.02866	0.03806	0.1123	0.095852		80460	rs4887357	A	0.3259	0.3049	-0.0356	0.03806		80460	rs7183016	A	0.3118	0.3384	-0.0267	0.1123		80460	rs7183016	A	0.2674	0.2964	-0.0267	0.1123		80460	rs7183016	A	0.3425	0.3234	-0.0267	0.1123		80460	rs7163498	G	0.2977	0.3252	-0.0276
80464	1	8843299	8931149		0.0313	0.0321	0.03162	0.07651	0.0874	0.083044		80464	rs2071414	G	0.2705	0.2417	0.0321	0.07651		80464	rs2274971	T	0.2767	0.2256	0.0313	0.0874		80464	rs2071414	G	0.2727	0.2764	0.0321	0.07651		80464	rs2274971	T	0.2397	0.2636	0.0313	0.0874		80464	rs2274971	T	0.2733	0.2451	0.0313
80637	8	33443076	33562618		0.0289	0.0302	0.02994	0.04879	0.07788	0.054608		80637	rs1530344	G	0.4955	0.4789	0.0302	0.04879		80637	rs1530344	G	0.5	0.4146	0.0302	0.04879		80637	rs1530344	G	0.4537	0.4806	0.0302	0.04879		80637	rs1530344	G	0.3973	0.4576	0.0302	0.04879		80637	rs12545740	C	0.4517	0.444	0.0289
80987	2	144162450	144445980	ARHGAP15,ENSG00000257277	0.0294	0.0327	0.03138	0.03833	0.06866	0.050462		80987	rs6708276	G	0.3946	0.3553	0.0294	0.06866		80987	rs6708276	G	0.3848	0.4146	0.0294	0.06866		80987	rs2381553	G	0.3663	0.3964	0.0327	0.03833		80987	rs2381553	G	0.3973	0.4042	0.0327	0.03833		80987	rs2381553	G	0.3863	0.3566	0.0327
81078	10	15521848	15559928		-0.0323	-0.023	-0.02652	0.04841	0.1598	0.115308		81078	rs10796292	A	0.3283	0.3476	-0.023	0.1598		81078	rs10796292	A	0.3778	0.372	-0.023	0.1598		81078	rs2167451	C	0.4127	0.3818	-0.0323	0.04841		81078	rs10796292	A	0.3356	0.3952	-0.023	0.1598		81078	rs10752378	A	0.3576	0.3796	-0.0313
81169	10	59801062	60118681	UBE2D1	-0.0321	-0.0245	-0.02702	0.03841	0.116	0.088746		81169	rs10826172	C	0.4438	0.4207	-0.0245	0.116		81169	rs1905455	T	0.4326	0.497	-0.0321	0.03841		81169	rs10826175	A	0.4447	0.4885	-0.0295	0.05732		81169	rs10826172	C	0.4041	0.3524	-0.0245	0.116		81169	rs10826172	C	0.4277	0.4341	-0.0245
81253	16	12937723	13077901	SHISA9	-0.0351	-0.0314	-0.0328	0.03845	0.06337	0.048972		81253	rs275404	A	0.3027	0.3441	-0.0325	0.04768		81253	rs275404	A	0.3301	0.3963	-0.0325	0.04768		81253	rs275404	A	0.3155	0.3558	-0.0325	0.04768		81253	rs7201008	T	0.2808	0.3383	-0.0351	0.03845		81253	rs11649299	A	0.3178	0.3282	-0.0314
81395	12	34073636	34245756		-0.0345	-0.0214	-0.02684	0.06472	0.277	0.192604		81395	rs10844775	G	0.1714	0.1896	-0.0332	0.1069		81395	rs5004272	G	0.2163	0.2348	-0.0345	0.06472		81395	rs10844778	A	0.1676	0.1639	-0.0237	0.2374		81395	rs11053046	G	0.137	0.2139	-0.0214	0.277		81395	rs11053046	G	0.1731	0.1991	-0.0214
81568	7	134415688	134835350	AGBL3	0.0199	0.0237	0.02156	0.1466	0.1973	0.17412		81568	rs10215144	G	0.4723	0.4496	0.0199	0.1973		81568	rs7795497	A	0.4916	0.4939	0.0206	0.1828		81568	rs10215144	G	0.4946	0.4691	0.0199	0.1973		81568	rs10227500	C	0.4589	0.497	0.0237	0.1466		81568	rs10227500	C	0.4879	0.4919	0.0237
81742	2	76810878	76957396		0.0725	0.0796	0.07468	0.06376	0.07835	0.072718		81742	rs10172954	T	0.05446	0.04545	0.0725	0.07835		81742	rs10172954	T	0.04494	0.03963	0.0725	0.07835		81742	rs10172954	T	0.05704	0.03515	0.0725	0.07835		81742	rs12053161	G	0.06164	0.04217	0.0796	0.06376		81742	rs10173124	A	0.04219	0.04039	0.0763
81744	4	89482021	89701044	ENSG00000287542	0.0155	0.0343	0.02178	0.04973	0.4099	0.267346		81744	rs10084787	A	0.242	0.2539	0.0343	0.04973		81744	rs6850944	C	0.2549	0.2178	0.0218	0.2336		81744	rs6850944	C	0.2804	0.2473	0.0218	0.2336		81744	rs3844295	A	0.2847	0.2301	0.0155	0.4099		81744	rs3844295	A	0.2754	0.2468	0.0155
82007	8	72556469	72719023		0.066	0.066	0.066	0.03885	0.03885	0.03885		82007	rs17727266	C	0.07679	0.07982	0.066	0.03885		82007	rs17727266	C	0.07303	0.03659	0.066	0.03885		82007	rs17727266	C	0.07143	0.04909	0.066	0.03885		82007	rs17727266	C	0.0411	0.0509	0.066	0.03885		82007	rs17727266	C	0.06099	0.05546	0.066
82964	12	118197368	119725401		0.0305	0.0325	0.0321	0.03937	0.05538	0.042572		82964	rs2555253	G	0.4464	0.4146	0.0325	0.03937		82964	rs2727727	G	0.382	0.378	0.0305	0.05538		82964	rs2555253	G	0.4482	0.3886	0.0325	0.03937		82964	rs2555253	G	0.3562	0.4311	0.0325	0.03937		82964	rs2555253	G	0.4088	0.409	0.0325
83104	9	118514521	119474700	ASTN2	0.0113	0.0288	0.0248	0.1955	0.6543	0.29656		83104	rs1441748	C	0.1477	0.1455	0.0288	0.1955		83104	rs7042951	T	0.1362	0.1616	0.0113	0.6543		83104	rs1441748	C	0.1622	0.137	0.0288	0.1955		83104	rs1441748	C	0.1849	0.1168	0.0288	0.1955		83104	rs10983240	A	0.1609	0.1369	0.0263
83420	2	135074768	135421558	TMEM163	0.0437	0.0589	0.05122	0.04563	0.1311	0.083564		83420	rs16830847	C	0.08304	0.06541	0.0437	0.1311		83420	rs7422711	T	0.07022	0.04878	0.0589	0.04563		83420	rs16830847	C	0.07665	0.07758	0.0437	0.1311		83420	rs16830888	G	0.08219	0.08537	0.054	0.05942		83420	rs16830865	A	0.08412	0.0644	0.0558
83551	13	25511595	26613880		0.0234	0.0278	0.02498	0.09304	0.134	0.118368		83551	rs9507636	C	0.4554	0.439	0.0234	0.134		83551	rs9507636	C	0.4537	0.4238	0.0234	0.134		83551	rs9507632	C	0.4527	0.4216	0.0241	0.1231		83551	rs9512057	A	0.3562	0.4641	0.0262	0.1077		83551	rs1109205	G	0.4317	0.4059	0.0278
83597	3	84333614	84518893		0.0179	0.0462	0.03834	0.04501	0.4139	0.131482		83597	rs17250522	C	0.1357	0.1221	0.0462	0.04501		83597	rs17250522	C	0.1475	0.138	0.0462	0.04501		83597	rs12630839	A	0.1248	0.1176	0.0384	0.09127		83597	rs6548950	A	0.1458	0.1317	0.0179	0.4139		83597	rs17196770	G	0.1196	0.1398	0.043
83612	3	99450469	100979041	COL8A1	0.0246	0.0266	0.02526	0.2266	0.2569	0.24418		83612	rs13080329	T	0.1527	0.1347	0.0266	0.2569		83612	rs1971381	G	0.1629	0.1677	0.0246	0.2458		83612	rs7614366	T	0.1604	0.1709	0.0259	0.2266		83612	rs1971381	G	0.1507	0.1747	0.0246	0.2458		83612	rs1971381	G	0.182	0.1556	0.0246
83693	17	26853742	29829622	RAB11FIP4	-0.0339	-0.0339	-0.0339	0.03975	0.03975	0.03975		83693	rs9909944	C	0.4679	0.4507	-0.0339	0.03975		83693	rs9909944	C	0.4537	0.4482	-0.0339	0.03975		83693	rs9909944	C	0.4287	0.4564	-0.0339	0.03975		83693	rs9909944	C	0.4247	0.4518	-0.0339	0.03975		83693	rs9909944	C	0.4294	0.4803	-0.0339
83774	14	102961753	103937372	MARK3	0.029	0.0328	0.03094	0.05776	0.09133	0.076004		83774	rs7149767	A	0.2571	0.2583	0.029	0.09133		83774	rs7149767	A	0.3056	0.3018	0.029	0.09133		83774	rs10148970	G	0.3161	0.2788	0.0324	0.05776		83774	rs8014013	C	0.2945	0.2754	0.0328	0.06407		83774	rs17841064	T	0.2969	0.2635	0.0315
83832	17	60117192	62705738		-0.0397	-0.0312	-0.03402	0.04221	0.09904	0.07844		83832	rs2676289	G	0.2438	0.2747	-0.0312	0.09904		83832	rs2676289	G	0.2711	0.2439	-0.0312	0.09904		83832	rs11653958	G	0.2417	0.2428	-0.0368	0.05287		83832	rs2676289	G	0.2394	0.2393	-0.0312	0.09904		83832	rs2428352	A	0.2462	0.2766	-0.0397
83857	7	14271721	14308129	DGKB	-0.0307	-0.0284	-0.0297	0.05041	0.07088	0.06262		83857	rs38278	A	0.4223	0.4279	-0.0304	0.05149		83857	rs40450	A	0.389	0.4573	-0.0284	0.06944		83857	rs38275	T	0.4394	0.4339	-0.0295	0.07088		83857	rs38275	T	0.4658	0.4521	-0.0295	0.07088		83857	rs17710027	G	0.4346	0.4641	-0.0307
83925	5	95198252	95224008	ENSG00000250362	0.0302	0.0302	0.0302	0.07382	0.07382	0.07382		83925	rs154447	G	0.3107	0.2822	0.0302	0.07382		83925	rs154447	G	0.3132	0.253	0.0302	0.07382		83925	rs154447	G	0.3004	0.297	0.0302	0.07382		83925	rs154447	G	0.3288	0.2485	0.0302	0.07382		83925	rs154447	G	0.2839	0.2837	0.0302
83998	4	170013910	170250485	SH3RF1	0.0371	0.0393	0.03754	0.07462	0.0847	0.082684		83998	rs13139803	T	0.1554	0.1654	0.0393	0.07462		83998	rs17626617	C	0.1882	0.1341	0.0371	0.0847		83998	rs17626617	C	0.18	0.143	0.0371	0.0847		83998	rs17626617	C	0.1918	0.2365	0.0371	0.0847		83998	rs17626617	C	0.1703	0.1549	0.0371
84054	13	23639868	24746151	SPATA13,ENSG00000273167	-0.0993	-0.0407	-0.05242	0.03995	0.2626	0.21807		84054	rs1220582	T	0.05625	0.0643	-0.0407	0.2626		84054	rs4303330	G	0.03792	0.03049	-0.0993	0.03995		84054	rs1220582	T	0.05258	0.04121	-0.0407	0.2626		84054	rs1220582	T	0.06849	0.03916	-0.0407	0.2626		84054	rs1220582	T	0.04737	0.05914	-0.0407
84578	1	162821910	164555286	PBX1	0.0329	0.0329	0.0329	0.04023	0.04023	0.04023		84578	rs1780365	A	0.4107	0.3928	0.0329	0.04023		84578	rs1780365	A	0.3539	0.3323	0.0329	0.04023		84578	rs1780365	A	0.3681	0.3345	0.0329	0.04023		84578	rs1780365	A	0.3973	0.3323	0.0329	0.04023		84578	rs1780365	A	0.3462	0.3864	0.0329
84875	10	131962261	132074113	LINC02646	0.0295	0.0367	0.03526	0.05596	0.1392	0.072608		84875	rs7909507	G	0.2312	0.217	0.0367	0.05596		84875	rs7909507	G	0.2289	0.1768	0.0367	0.05596		84875	rs7909507	G	0.1934	0.1988	0.0367	0.05596		84875	rs7909507	G	0.1667	0.1646	0.0367	0.05596		84875	rs11017178	G	0.202	0.2039	0.0295
84929	16	10124183	10216682	GRIN2A	0.0402	0.041	0.04068	0.04041	0.05013	0.045194		84929	rs1375067	T	0.1866	0.1563	0.0406	0.05013		84929	rs1375067	T	0.1756	0.1829	0.0406	0.05013		84929	rs4782265	A	0.1863	0.1739	0.041	0.04041		84929	rs4782265	A	0.2192	0.2126	0.041	0.04041		84929	rs4780817	C	0.1853	0.1604	0.0402
85123	1	54395282	54625292	ENSG00000256407	0.0288	0.0419	0.03634	0.04052	0.1223	0.073842		85123	rs17109929	A	0.1786	0.1637	0.0411	0.04052		85123	rs6699826	T	0.1756	0.1951	0.0419	0.04357		85123	rs17109929	A	0.1723	0.1575	0.0411	0.04052		85123	rs660514	A	0.1986	0.2515	0.0288	0.1223		85123	rs660514	A	0.2302	0.198	0.0288
85127	3	43883247	43932045		0.0183	0.0332	0.02426	0.05726	0.2918	0.197984		85127	rs6789465	A	0.2634	0.2458	0.0332	0.05726		85127	rs6789465	A	0.2795	0.2256	0.0332	0.05726		85127	rs4082418	C	0.2714	0.3123	0.0183	0.2918		85127	rs4082418	C	0.2466	0.3054	0.0183	0.2918		85127	rs4082418	C	0.3076	0.2791	0.0183
86275	2	19764170	19915438		0.0287	0.0322	0.02944	0.04116	0.08911	0.073244		86275	rs1453205	C	0.4464	0.4234	0.0322	0.04116		86275	rs4572555	T	0.4466	0.4268	0.0287	0.08911		86275	rs873635	T	0.4357	0.4461	0.0288	0.07342		86275	rs4572555	T	0.4653	0.4699	0.0287	0.08911		86275	rs873635	T	0.4653	0.4354	0.0288
86332	2	234350472	234688327	MROH2A	-0.1078	-0.0669	-0.0892	0.08	0.2696	0.15968		86332	rs1500476	T	0.02054	0.01996	-0.0871	0.1649		86332	rs9784064	A	0.005618	0.02134	-0.0669	0.2696		86332	rs17862884	A	0.01248	0.01515	-0.1078	0.08		86332	rs1500476	T	0.0137	0.01198	-0.0871	0.1649		86332	rs17863803	G	0.01526	0.03041	-0.0971
86738	17	30756008	33733767		0.0042	0.026	0.01396	0.4487	0.9047	0.69446		86738	rs1828836	T	0.07143	0.06153	0.0132	0.7063		86738	rs1828836	T	0.07163	0.06707	0.0132	0.7063		86738	rs12937141	C	0.07762	0.05664	0.0042	0.9047		86738	rs1828836	T	0.06164	0.07576	0.0132	0.7063		86738	rs12948161	G	0.06104	0.06947	0.026
86879	18	3605943	3615943	DLGAP1	-0.0218	-0.0218	-0.0218	0.188	0.188	0.188		86879	rs11876399	C	0.4186	0.4384	-0.0218	0.188		86879	rs11876399	C	0.4087	0.4024	-0.0218	0.188		86879	rs11876399	C	0.3993	0.4375	-0.0218	0.188		86879	rs11876399	C	0.4236	0.4273	-0.0218	0.188		86879	rs11876399	C	0.4516	0.4148	-0.0218
87335	6	151083111	151126620	PLEKHG1	0.0308	0.0452	0.03944	0.04171	0.169	0.092626		87335	rs13211253	G	0.1518	0.1669	0.0452	0.04171		87335	rs7772605	A	0.1292	0.1159	0.0308	0.169		87335	rs7772605	A	0.131	0.1321	0.0308	0.169		87335	rs13211253	G	0.1644	0.1048	0.0452	0.04171		87335	rs13211253	G	0.1705	0.1454	0.0452
87571	15	81042439	83245384	CPEB1	-0.0409	-0.0409	-0.0409	0.04183	0.04183	0.04183		87571	rs4779033	C	0.1998	0.2079	-0.0409	0.04183		87571	rs4779033	C	0.1699	0.2256	-0.0409	0.04183		87571	rs4779033	C	0.1783	0.1945	-0.0409	0.04183		87571	rs4779033	C	0.1918	0.2186	-0.0409	0.04183		87571	rs4779033	C	0.1728	0.2042	-0.0409
87630	6	26107463	26233321	H2AC6	-0.0343	-0.0337	-0.03382	0.1041	0.1416	0.1341		87630	rs129128	C	0.1089	0.1232	-0.0337	0.1416		87630	rs198846	A	0.1517	0.1555	-0.0343	0.1041		87630	rs129128	C	0.1221	0.1503	-0.0337	0.1416		87630	rs129128	C	0.1875	0.1138	-0.0337	0.1416		87630	rs129128	C	0.1246	0.1442	-0.0337
87837	3	56797417	56798129	ARHGEF3	-0.0313	-0.0275	-0.02826	0.05088	0.07932	0.073632		87837	rs10510788	C	0.4411	0.4662	-0.0275	0.07932		87837	rs10510788	C	0.441	0.4329	-0.0275	0.07932		87837	rs7611544	C	0.4339	0.4297	-0.0313	0.05088		87837	rs10510788	C	0.4315	0.4337	-0.0275	0.07932		87837	rs10510788	C	0.4101	0.4425	-0.0275
88275	5	130439091	130547165		0.0236	0.0327	0.02826	0.06136	0.2156	0.134616		88275	rs3891636	C	0.2196	0.2034	0.0239	0.2156		88275	rs6596004	T	0.243	0.189	0.0323	0.08302		88275	rs3864283	C	0.2799	0.247	0.0236	0.1915		88275	rs6874948	C	0.2603	0.2861	0.0327	0.06136		88275	rs1035440	T	0.2097	0.22	0.0288
88458	3	2255235	2277951	CNTN4	0.0349	0.0371	0.03666	0.06106	0.07924	0.064696		88458	rs17010936	G	0.2232	0.1996	0.0371	0.06106		88458	rs17010936	G	0.2402	0.1677	0.0371	0.06106		88458	rs9873966	G	0.2135	0.1917	0.0349	0.07924		88458	rs17010936	G	0.2361	0.2126	0.0371	0.06106		88458	rs17010936	G	0.1899	0.2002	0.0371
88730	14	40836194	41766444	ENSG00000258385	-0.0384	-0.0302	-0.03512	0.04242	0.1086	0.068892		88730	rs17616128	T	0.2308	0.245	-0.0384	0.04242		88730	rs17616128	T	0.2275	0.2744	-0.0384	0.04242		88730	rs17616128	T	0.2223	0.2261	-0.0384	0.04242		88730	rs4128083	T	0.2671	0.1898	-0.0302	0.1086		88730	rs4128083	T	0.2258	0.2684	-0.0302
89000	6	165688210	165798175	PDE10A	-0.0254	-0.0223	-0.02474	0.1078	0.1645	0.12282		89000	rs487489	A	0.3598	0.3867	-0.0254	0.1078		89000	rs487489	A	0.3792	0.3689	-0.0254	0.1078		89000	rs537436	G	0.3679	0.3903	-0.0253	0.1097		89000	rs572280	A	0.4315	0.3623	-0.0223	0.1645		89000	rs13202475	G	0.3672	0.4047	-0.0253
89172	9	111870040	112830219	PALM2AKAP2	0.0282	0.0355	0.03284	0.04264	0.09437	0.060698		89172	rs521883	A	0.2982	0.2783	0.0282	0.09437		89172	rs539817	T	0.2704	0.2439	0.0355	0.04264		89172	rs539817	T	0.3048	0.2555	0.0355	0.04264		89172	rs539817	T	0.2329	0.3473	0.0355	0.04264		89172	rs260214	C	0.2942	0.2975	0.0295
89889	8	30990110	31146856	WRN	0.028	0.0301	0.02894	0.06428	0.08458	0.074104		89889	rs2252480	A	0.3723	0.3886	0.0284	0.07384		89889	rs6994361	C	0.4143	0.3445	0.0291	0.07391		89889	rs2553256	C	0.3966	0.397	0.0301	0.06428		89889	rs6994361	C	0.3767	0.4036	0.0291	0.07391		89889	rs2737333	T	0.4111	0.3818	0.028
89943	12	123287324	124721371	RFLNA	-0.0433	-0.011	-0.03022	0.08339	0.6437	0.307682		89943	rs11057530	G	0.1098	0.1391	-0.0429	0.08381		89943	rs11057530	G	0.132	0.09756	-0.0429	0.08381		89943	rs11057532	T	0.1417	0.1424	-0.011	0.6437		89943	rs11057532	T	0.2183	0.1273	-0.011	0.6437		89943	rs11057528	T	0.1151	0.1416	-0.0433
90361	5	151892938	151916514	ENSG00000286749	0.0302	0.0329	0.03236	0.04328	0.06533	0.04769		90361	rs4569857	G	0.3625	0.3465	0.0329	0.04328		90361	rs4569857	G	0.3371	0.3201	0.0329	0.04328		90361	rs4569857	G	0.3333	0.363	0.0329	0.04328		90361	rs4569857	G	0.3699	0.3353	0.0329	0.04328		90361	rs12654265	C	0.3527	0.3426	0.0302
90401	8	115066287	115138027		0.0282	0.0389	0.033	0.06163	0.1596	0.113652		90401	rs12549856	C	0.1867	0.1667	0.0389	0.06163		90401	rs12549856	C	0.1901	0.1111	0.0389	0.06163		90401	rs10099125	C	0.1809	0.1861	0.0282	0.1596		90401	rs10099125	C	0.2153	0.2199	0.0282	0.1596		90401	rs10087835	G	0.1993	0.1649	0.0308
91171	10	96955712	96997820	PDLIM1	0.0265	0.0434	0.04002	0.04371	0.2051	0.075988		91171	rs1049814	G	0.2116	0.1948	0.0434	0.04371		91171	rs1049814	G	0.2008	0.2287	0.0434	0.04371		91171	rs12357280	T	0.1881	0.1745	0.0265	0.2051		91171	rs1049814	G	0.226	0.1856	0.0434	0.04371		91171	rs1049814	G	0.2142	0.1837	0.0434
91475	8	121042410	121111591	DEPTOR	0.0428	0.0457	0.04396	0.1114	0.132	0.12376		91475	rs7836934	C	0.07975	0.06514	0.0457	0.1114		91475	rs7836934	C	0.1011	0.08232	0.0457	0.1114		91475	rs7835799	T	0.08378	0.08606	0.0428	0.132		91475	rs7835799	T	0.07534	0.09036	0.0428	0.132		91475	rs7835799	T	0.1006	0.06835	0.0428
92009	17	58066477	60712745	MRC2	-0.032	-0.0237	-0.0291	0.04415	0.1338	0.07231		92009	rs2041286	A	0.3777	0.3991	-0.0316	0.04415		92009	rs8078132	A	0.3792	0.4055	-0.0266	0.0908		92009	rs2041286	A	0.3708	0.4139	-0.0316	0.04415		92009	rs2465412	C	0.3973	0.3939	-0.032	0.04865		92009	rs11079481	G	0.4242	0.397	-0.0237
92021	11	44826634	44870058	TSPAN18	0.0261	0.0342	0.03096	0.04416	0.127	0.077296		92021	rs7110434	A	0.2973	0.2727	0.0261	0.127		92021	rs7110434	A	0.264	0.2774	0.0261	0.127		92021	rs12804300	G	0.2923	0.2812	0.0342	0.04416		92021	rs12804300	G	0.2877	0.3323	0.0342	0.04416		92021	rs12804300	G	0.3039	0.2652	0.0342
92439	3	35117703	35167155		-0.0272	-0.0245	-0.02632	0.0886	0.113	0.096		92439	rs11129639	T	0.4188	0.4468	-0.0245	0.113		92439	rs4541358	C	0.448	0.436	-0.0255	0.1012		92439	rs2127119	T	0.3973	0.4341	-0.0272	0.0886		92439	rs2127119	T	0.4178	0.4251	-0.0272	0.0886		92439	rs2127119	T	0.4416	0.4204	-0.0272
92604	1	205401242	207357522	C4BPA	-0.1111	-0.0845	-0.09898	0.04447	0.1118	0.088636		92604	rs12091603	C	0.01429	0.02611	-0.0979	0.1118		92604	rs12091603	C	0.0323	0.01829	-0.0979	0.1118		92604	rs12064433	G	0.01426	0.02364	-0.0845	0.1109		92604	rs17022385	C	0.02055	0.02096	-0.1035	0.06421		92604	rs11120277	C	0.02421	0.02326	-0.1111
92769	1	91025986	91265088	LINC02609	0.0255	0.0269	0.0258	0.09924	0.1162	0.112628		92769	rs10922926	T	0.3562	0.3376	0.0255	0.1162		92769	rs3904678	A	0.3455	0.3537	0.0256	0.1153		92769	rs12041978	A	0.333	0.3592	0.0269	0.09924		92769	rs10922926	T	0.3425	0.3383	0.0255	0.1162		92769	rs10922926	T	0.3741	0.3095	0.0255
92836	14	92397374	93346787		0.0277	0.0344	0.03262	0.06184	0.1331	0.08189		92836	rs17748637	T	0.2304	0.2073	0.0344	0.06184		92836	rs17748637	T	0.2135	0.2209	0.0344	0.06184		92836	rs4337231	A	0.233	0.2145	0.0277	0.1331		92836	rs17748637	T	0.226	0.2156	0.0344	0.06184		92836	rs11626047	C	0.2329	0.203	0.0322
93055	11	74002571	74378871	POLD3	0.0265	0.0286	0.02724	0.07012	0.08684	0.079596		93055	rs11825804	G	0.4929	0.4634	0.0273	0.07709		93055	rs11825804	G	0.4986	0.4817	0.0273	0.07709		93055	rs10219203	C	0.4893	0.4939	0.0286	0.07012		93055	rs10793092	G	0.4247	0.494	0.0265	0.08684		93055	rs10793092	G	0.482	0.4747	0.0265
93572	8	87371444	87544174	CPNE3	-0.0301	-0.0191	-0.02666	0.08746	0.3033	0.148832		93572	rs10087788	G	0.2348	0.2561	-0.0301	0.1046		93572	rs6471296	A	0.2528	0.2896	-0.0295	0.08746		93572	rs10112123	C	0.2121	0.2509	-0.0191	0.3033		93572	rs4961193	C	0.2055	0.262	-0.0261	0.1463		93572	rs10086340	A	0.2614	0.2451	-0.0285
93842	7	32142956	32176431	PDE1C	0.0293	0.0293	0.0293	0.1005	0.1005	0.1005		93842	rs6947433	T	0.292	0.2688	0.0293	0.1005		93842	rs6947433	T	0.2346	0.2622	0.0293	0.1005		93842	rs6947433	T	0.3048	0.2709	0.0293	0.1005		93842	rs6947433	T	0.274	0.2874	0.0293	0.1005		93842	rs6947433	T	0.2592	0.2576	0.0293
93865	1	202846320	204572050		0.0307	0.0349	0.03366	0.04516	0.06963	0.054518		93865	rs10900601	A	0.2777	0.25	0.0349	0.04516		93865	rs10900601	A	0.2795	0.2683	0.0349	0.04516		93865	rs898386	A	0.3217	0.2649	0.0307	0.06963		93865	rs4245739	C	0.3425	0.2994	0.0339	0.05632		93865	rs4245739	C	0.274	0.2662	0.0339
93932	17	51319462	53962955	ENSG00000262052	-0.044	-0.0323	-0.04112	0.051	0.1628	0.077762		93932	rs1454113	T	0.1446	0.1613	-0.0428	0.05892		93932	rs1454113	T	0.1348	0.1159	-0.0428	0.05892		93932	rs10515113	G	0.1221	0.1485	-0.044	0.051		93932	rs8081642	T	0.1712	0.1766	-0.0323	0.1628		93932	rs11079197	G	0.1406	0.1241	-0.0437
94184	22	19258809	20944155	CCDC74BP1	-0.0356	-0.02	-0.02986	0.04531	0.2685	0.109772		94184	rs165600	G	0.2732	0.3021	-0.0356	0.04531		94184	rs886319	C	0.2809	0.2165	-0.02	0.2685		94184	rs165674	T	0.2585	0.263	-0.0293	0.1004		94184	rs4821963	T	0.2877	0.2771	-0.0322	0.06238		94184	rs165908	A	0.2458	0.2873	-0.0322
95048	16	56621014	58065624	MMP15	0.0271	0.0353	0.03202	0.04578	0.121	0.075868		95048	rs11648508	G	0.3196	0.3032	0.0353	0.04578		95048	rs11648508	G	0.2963	0.2835	0.0353	0.04578		95048	rs11648508	G	0.3262	0.2882	0.0353	0.04578		95048	rs4784887	G	0.3493	0.262	0.0271	0.121		95048	rs4784887	G	0.2808	0.271	0.0271
95056	4	89945459	90166485	FAM13A	0.0275	0.0314	0.02828	0.04579	0.08426	0.076566		95056	rs1343921	T	0.4571	0.4756	0.0275	0.08426		95056	rs9993181	T	0.4944	0.4939	0.0314	0.04579		95056	rs1343921	T	0.492	0.4685	0.0275	0.08426		95056	rs1343921	T	0.4589	0.4551	0.0275	0.08426		95056	rs1343921	T	0.4883	0.4592	0.0275
95321	12	37899288	39609643		-0.0335	-0.0275	-0.02938	0.06722	0.1416	0.116356		95321	rs7973610	T	0.1902	0.2384	-0.0275	0.1416		95321	rs7973610	T	0.2205	0.2896	-0.0275	0.1416		95321	rs10876694	G	0.212	0.2254	-0.0335	0.06722		95321	rs7973610	T	0.2603	0.2365	-0.0275	0.1416		95321	rs10876673	A	0.2482	0.2174	-0.0309
95415	16	12585447	12677946	ENSG00000259899	-0.0293	-0.0282	-0.02886	0.09254	0.1176	0.102564		95415	rs17224848	A	0.2562	0.2722	-0.0293	0.09254		95415	rs17224848	A	0.2697	0.2744	-0.0293	0.09254		95415	rs17224848	A	0.2433	0.2794	-0.0293	0.09254		95415	rs17823157	T	0.1986	0.2725	-0.0282	0.1176		95415	rs17823157	T	0.2489	0.2634	-0.0282
95425	5	30292538	30333721		0.0267	0.0304	0.02822	0.06595	0.09862	0.083824		95425	rs4262122	A	0.3571	0.3381	0.0289	0.0759		95425	rs4867263	G	0.4045	0.3232	0.0267	0.09862		95425	rs10061853	A	0.3449	0.3533	0.0284	0.08003		95425	rs4867263	G	0.4178	0.3593	0.0267	0.09862		95425	rs10035181	G	0.3599	0.3312	0.0304
95446	5	159699532	159766954	CCNJL	0.0303	0.0303	0.0303	0.05262	0.05262	0.05262		95446	rs4921132	G	0.45	0.4157	0.0303	0.05262		95446	rs4921132	G	0.441	0.3994	0.0303	0.05262		95446	rs4921132	G	0.4635	0.4236	0.0303	0.05262		95446	rs4921132	G	0.4863	0.4102	0.0303	0.05262		95446	rs4921132	G	0.4484	0.4256	0.0303
95461	20	30689016	31229392	C20orf203,ENSG00000285382	-0.0416	-0.017	-0.02716	0.04601	0.4309	0.271384		95461	rs6141768	A	0.1536	0.1796	-0.0178	0.417		95461	rs6141768	A	0.1376	0.1829	-0.0178	0.417		95461	rs12624715	G	0.1569	0.1632	-0.017	0.4309		95461	rs1407256	G	0.1575	0.1566	-0.0416	0.04601		95461	rs1407256	G	0.1341	0.1436	-0.0416
95577	20	8446519	8512994	PLCB1	0.0228	0.0323	0.0266	0.04607	0.144	0.104828		95577	rs2064271	G	0.3991	0.4169	0.0323	0.04607		95577	rs2064271	G	0.4031	0.3963	0.0323	0.04607		95577	rs2423360	G	0.3904	0.4139	0.0228	0.144		95577	rs2423360	G	0.4589	0.4006	0.0228	0.144		95577	rs2423360	G	0.4274	0.377	0.0228
95767	2	100783479	101432710		0.0377	0.0409	0.03898	0.08524	0.11	0.100096		95767	rs12475500	A	0.1402	0.1232	0.0409	0.08524		95767	rs12475500	A	0.1222	0.1111	0.0409	0.08524		95767	rs7419651	A	0.1007	0.1127	0.0377	0.11		95767	rs7419651	A	0.1849	0.1377	0.0377	0.11		95767	rs7419651	A	0.1372	0.102	0.0377
95975	5	166126218	166199662		0.0305	0.0342	0.03346	0.0836	0.1274	0.09236		95975	rs1422821	T	0.2188	0.2029	0.0342	0.0836		95975	rs1422821	T	0.2149	0.1585	0.0342	0.0836		95975	rs1422821	T	0.1979	0.203	0.0342	0.0836		95975	rs1422821	T	0.2397	0.2305	0.0342	0.0836		95975	rs10070997	T	0.2037	0.219	0.0305
96345	2	165846795	166138549	SCN2A	0.036	0.036	0.036	0.07529	0.07529	0.07529		96345	rs9287856	T	0.208	0.1912	0.036	0.07529		96345	rs9287856	T	0.2107	0.184	0.036	0.07529		96345	rs9287856	T	0.1996	0.1679	0.036	0.07529		96345	rs9287856	T	0.1507	0.1856	0.036	0.07529		96345	rs9287856	T	0.1844	0.1708	0.036
96663	1	68841142	69068831		0.0268	0.0295	0.02826	0.08602	0.1314	0.1053		96663	rs12406361	G	0.2786	0.2622	0.0286	0.09604		96663	rs12406361	G	0.2795	0.25	0.0286	0.09604		96663	rs2507205	C	0.2906	0.2888	0.0278	0.117		96663	rs3004682	G	0.3125	0.2635	0.0268	0.1314		96663	rs2473784	A	0.3067	0.27	0.0295
96694	7	17076832	17115292	AHR,ENSG00000237773	-0.0265	-0.0202	-0.02432	0.1146	0.2484	0.16072		96694	rs11765040	T	0.2973	0.3093	-0.0202	0.2484		96694	rs4265079	T	0.3258	0.3445	-0.0242	0.163		96694	rs4265079	T	0.3298	0.2988	-0.0242	0.163		96694	rs6973246	A	0.2877	0.3313	-0.0265	0.1146		96694	rs6973246	A	0.2846	0.3126	-0.0265
96741	3	2436134	2510409	CNTN4	-0.0204	-0.0191	-0.01942	0.2498	0.276	0.26386		96741	rs6787193	G	0.2513	0.2952	-0.0204	0.2498		96741	rs6802636	C	0.2921	0.2835	-0.0191	0.2645		96741	rs6802636	C	0.2888	0.3303	-0.0191	0.2645		96741	rs6802636	C	0.3082	0.2904	-0.0191	0.2645		96741	rs6787085	T	0.2715	0.2855	-0.0194
97051	14	100240293	101170540		-0.0315	-0.0315	-0.0315	0.06114	0.06114	0.06114		97051	rs10146962	C	0.3152	0.3387	-0.0315	0.06114		97051	rs10146962	C	0.3146	0.3049	-0.0315	0.06114		97051	rs10146962	C	0.3223	0.3479	-0.0315	0.06114		97051	rs10146962	C	0.3219	0.4132	-0.0315	0.06114		97051	rs10146962	C	0.3177	0.3432	-0.0315
97120	20	831000	886002	ANGPT4	0.0304	0.0369	0.03416	0.04695	0.09793	0.068036		97120	rs6039123	C	0.2839	0.2694	0.0335	0.07374		97120	rs6039123	C	0.2107	0.2622	0.0335	0.07374		97120	rs6039134	T	0.2728	0.2703	0.0369	0.04695		97120	rs6118168	C	0.3425	0.2665	0.0365	0.04782		97120	rs2144151	G	0.2698	0.2428	0.0304
97124	1	242083988	244023667		0.0246	0.0341	0.02802	0.04696	0.1453	0.108096		97124	rs3008657	G	0.3527	0.3485	0.0246	0.1453		97124	rs4430311	C	0.3427	0.378	0.0341	0.04696		97124	rs12753750	C	0.3619	0.3297	0.0322	0.05762		97124	rs3008657	G	0.363	0.3293	0.0246	0.1453		97124	rs3008657	G	0.359	0.333	0.0246
97664	9	80175562	80985742		0.0318	0.035	0.03308	0.04726	0.07993	0.066862		97664	rs3010744	A	0.2688	0.2433	0.035	0.04726		97664	rs3010744	A	0.2444	0.2713	0.035	0.04726		97664	rs2989579	C	0.2674	0.2267	0.0318	0.07993		97664	rs2989579	C	0.2877	0.238	0.0318	0.07993		97664	rs2989579	C	0.2548	0.2369	0.0318
97692	3	125309954	126836180		-0.0498	-0.0175	-0.04034	0.2188	0.6316	0.3306		97692	rs10512654	T	0.03839	0.05432	-0.0498	0.2188		97692	rs16836952	C	0.04507	0.06442	-0.0423	0.2849		97692	rs10512654	T	0.03119	0.04909	-0.0498	0.2188		97692	rs16836892	C	0.03472	0.04545	-0.0175	0.6316		97692	rs10512658	A	0.03402	0.03676	-0.0423
98418	2	108245143	108850844		0.0273	0.0284	0.02762	0.07521	0.08792	0.085146		98418	rs4676183	A	0.3714	0.3487	0.0273	0.08792		98418	rs4676183	A	0.3806	0.3384	0.0273	0.08792		98418	rs1470874	A	0.3699	0.3594	0.0278	0.08676		98418	rs4676183	A	0.3014	0.4102	0.0273	0.08792		98418	rs12052813	G	0.4015	0.3737	0.0284
98428	8	142895919	142910492		0.0369	0.0686	0.04342	0.04767	0.3171	0.259954		98428	rs13256308	G	0.05268	0.0444	0.0369	0.3171		98428	rs7013384	A	0.0618	0.03354	0.0686	0.04767		98428	rs10103803	G	0.04456	0.04848	0.0378	0.3008		98428	rs13256308	G	0.03425	0.03892	0.0369	0.3171		98428	rs13256308	G	0.05053	0.06082	0.0369
98506	1	91375139	91602551		0.0322	0.035	0.03276	0.09741	0.1209	0.116202		98506	rs346994	A	0.1643	0.1602	0.0322	0.1209		98506	rs346994	A	0.1559	0.09756	0.0322	0.1209		98506	rs346994	A	0.1765	0.1709	0.0322	0.1209		98506	rs346994	A	0.1918	0.1467	0.0322	0.1209		98506	rs165289	A	0.1842	0.1637	0.035
99043	13	34387094	35489094		-0.0377	-0.0149	-0.02858	0.048	0.4606	0.21304		99043	rs7996850	G	0.2084	0.219	-0.0377	0.048		99043	rs7996850	G	0.1812	0.2317	-0.0377	0.048		99043	rs7996850	G	0.1925	0.2382	-0.0377	0.048		99043	rs977270	T	0.2329	0.1856	-0.0149	0.4606		99043	rs977270	T	0.1911	0.2	-0.0149
99298	6	165668138	165763277	PDE10A	-0.0375	-0.0357	-0.03678	0.04815	0.05921	0.055842		99298	rs9459375	T	0.1804	0.2195	-0.0375	0.05632		99298	rs9459375	T	0.2219	0.1951	-0.0375	0.05632		99298	rs17784909	G	0.2112	0.216	-0.0357	0.05921		99298	rs17784909	G	0.2055	0.2156	-0.0357	0.05921		99298	rs13211591	C	0.2176	0.2441	-0.0375
99937	14	72012929	72943176	RGS6	-0.0287	-0.0287	-0.0287	0.09136	0.09136	0.09136		99937	rs2074953	C	0.2991	0.3221	-0.0287	0.09136		99937	rs2074953	C	0.3202	0.3537	-0.0287	0.09136		99937	rs2074953	C	0.3071	0.3279	-0.0287	0.09136		99937	rs2074953	C	0.3014	0.3204	-0.0287	0.09136		99937	rs2074953	C	0.3166	0.347	-0.0287
100964	1	101970378	102200830	LINC01709	-0.0414	-0.0409	-0.041	0.04906	0.05882	0.056868		100964	rs11164282	G	0.1482	0.1707	-0.0409	0.05882		100964	rs4908177	C	0.1404	0.1494	-0.0414	0.04906		100964	rs11164282	G	0.1569	0.1885	-0.0409	0.05882		100964	rs11164282	G	0.1575	0.1657	-0.0409	0.05882		100964	rs11164282	G	0.1537	0.1853	-0.0409
101324	6	122210973	122247475		0.034	0.0397	0.03706	0.1053	0.1526	0.12928		101324	rs9398655	C	0.1366	0.1109	0.0372	0.1295		101324	rs9398655	C	0.1334	0.1098	0.0372	0.1295		101324	rs6919417	G	0.1223	0.1273	0.034	0.1526		101324	rs9398655	C	0.08904	0.08383	0.0372	0.1295		101324	rs7745447	T	0.1309	0.1022	0.0397
101724	4	97807484	98026507		-0.0292	-0.0277	-0.0289	0.05833	0.08127	0.062918		101724	rs9994928	C	0.4223	0.4562	-0.0292	0.05833		101724	rs9994928	C	0.4256	0.5	-0.0292	0.05833		101724	rs9994928	C	0.4528	0.44	-0.0292	0.05833		101724	rs9994928	C	0.4028	0.4815	-0.0292	0.05833		101724	rs12641381	C	0.3915	0.4376	-0.0277
101834	14	40041322	41053045		0.0096	0.0227	0.01492	0.3582	0.7063	0.5549		101834	rs1114857	A	0.1188	0.1197	0.0149	0.5446		101834	rs1952951	G	0.09972	0.1159	0.0227	0.3582		101834	rs10483498	T	0.08556	0.1067	0.0096	0.7063		101834	rs12588600	A	0.125	0.1084	0.0137	0.5827		101834	rs12588600	A	0.1165	0.09455	0.0137
101881	4	30646700	31040850	PCDH7	-0.0297	-0.0294	-0.02964	0.1172	0.122	0.11816		101881	rs6837499	A	0.192	0.2201	-0.0297	0.1172		101881	rs6837499	A	0.2107	0.2073	-0.0297	0.1172		101881	rs6837499	A	0.1934	0.2285	-0.0297	0.1172		101881	rs6837499	A	0.226	0.2665	-0.0297	0.1172		101881	rs10939327	T	0.2194	0.2081	-0.0294
101985	9	1406909	1413700		-0.0487	-0.0431	-0.04758	0.04963	0.06764	0.053232		101985	rs10119492	A	0.1333	0.1558	-0.0487	0.04963		101985	rs10119492	A	0.118	0.1585	-0.0487	0.04963		101985	rs16928755	T	0.1319	0.1285	-0.0431	0.06764		101985	rs10119492	A	0.1644	0.1446	-0.0487	0.04963		101985	rs10119492	A	0.1301	0.1131	-0.0487
102055	15	95889109	98091365	ENSG00000259582	0.0259	0.058	0.03874	0.04967	0.3729	0.243608		102055	rs2173788	A	0.1527	0.1131	0.0259	0.3729		102055	rs2173788	A	0.1306	0.1585	0.0259	0.3729		102055	rs1500646	A	0.1292	0.1188	0.058	0.04967		102055	rs2173788	A	0.1719	0.1581	0.0259	0.3729		102055	rs1500646	A	0.1305	0.09472	0.058
102110	9	4554432	4571728	SPATA6L,SLC1A1	-0.0306	-0.0192	-0.02778	0.0497	0.2283	0.089698		102110	rs11792309	T	0.4045	0.4457	-0.0297	0.05683		102110	rs7864496	T	0.4101	0.4665	-0.0192	0.2283		102110	rs2228622	A	0.4349	0.4545	-0.0306	0.0497		102110	rs11792309	T	0.3904	0.4311	-0.0297	0.05683		102110	rs11792309	T	0.4077	0.4158	-0.0297
102115	16	62997958	64521545	ENSG00000259846	0.0248	0.0319	0.02682	0.0497	0.1134	0.093658		102115	rs1437138	G	0.4964	0.4778	0.0248	0.1134		102115	rs11075542	T	0.4312	0.4177	0.0319	0.0497		102115	rs1437155	T	0.4866	0.4739	0.0278	0.07839		102115	rs1437138	G	0.4315	0.4849	0.0248	0.1134		102115	rs1437138	G	0.4815	0.4531	0.0248
102240	7	14642231	14675706	DGKB	-0.0559	-0.0559	-0.0559	0.04977	0.04977	0.04977		102240	rs17168320	G	0.07782	0.1002	-0.0559	0.04977		102240	rs17168320	G	0.1025	0.08841	-0.0559	0.04977		102240	rs17168320	G	0.08734	0.08	-0.0559	0.04977		102240	rs17168320	G	0.0942	0.08232	-0.0559	0.04977		102240	rs17168320	G	0.07362	0.09149	-0.0559
102243	15	56155671	58384199	ALDH1A2	0.0232	0.0308	0.02592	0.04996	0.1329	0.10226		102243	rs12911981	T	0.4902	0.4701	0.0308	0.04996		102243	rs12910902	C	0.4915	0.4403	0.0292	0.06264		102243	rs2453280	G	0.4973	0.48	0.0232	0.1329		102243	rs2453280	G	0.5	0.488	0.0232	0.1329		102243	rs2453280	G	0.4895	0.4991	0.0232
102278	12	25075275	25184008	IRAG2	0.0256	0.034	0.02896	0.04979	0.1229	0.093656		102278	rs11047768	A	0.2714	0.2528	0.034	0.04979		102278	rs11047768	A	0.302	0.2454	0.034	0.04979		102278	rs1012980	G	0.3075	0.2824	0.0256	0.1229		102278	rs1012980	G	0.2466	0.2725	0.0256	0.1229		102278	rs1012980	G	0.303	0.3052	0.0256
102629	5	141021619	141041435	ARAP3	-0.0307	-0.0307	-0.0307	0.05641	0.05641	0.05641		102629	rs3749759	G	0.3518	0.3869	-0.0307	0.05641		102629	rs3749759	G	0.3592	0.3811	-0.0307	0.05641		102629	rs3749759	G	0.3348	0.3689	-0.0307	0.05641		102629	rs3749759	G	0.3562	0.3772	-0.0307	0.05641		102629	rs3749759	G	0.357	0.3703	-0.0307
102758	10	11815455	11855461		-0.0327	-0.0327	-0.0327	0.07929	0.07929	0.07929		102758	rs7101167	T	0.2231	0.2583	-0.0327	0.07929		102758	rs7101167	T	0.2416	0.2378	-0.0327	0.07929		102758	rs7101167	T	0.2389	0.2697	-0.0327	0.07929		102758	rs7101167	T	0.2534	0.2425	-0.0327	0.07929		102758	rs7101167	T	0.2321	0.2334	-0.0327
102882	16	60524972	61984292	CDH8	-0.0489	-0.0449	-0.0466	0.1286	0.1522	0.13924		102882	rs3784847	G	0.08786	0.07718	-0.0472	0.1294		102882	rs7204089	A	0.05618	0.08537	-0.046	0.143		102882	rs12599346	C	0.07665	0.06917	-0.0489	0.1286		102882	rs7204089	A	0.05479	0.05988	-0.046	0.143		102882	rs12599168	G	0.05473	0.07852	-0.0449
103168	5	20500186	20538335	CDH18	0.0183	0.0256	0.02402	0.1089	0.2298	0.1332		103168	rs1355057	T	0.4893	0.4612	0.0254	0.1091		103168	rs1355057	T	0.486	0.5	0.0254	0.1091		103168	rs1355057	T	0.4938	0.4952	0.0254	0.1091		103168	rs906629	C	0.4658	0.497	0.0183	0.2298		103168	rs10941831	A	0.4916	0.4696	0.0256
103507	3	42090492	42136009	TRAK1	-0.0235	-0.0217	-0.0226	0.1383	0.165	0.1547		103507	rs1995137	A	0.392	0.408	-0.0235	0.1383		103507	rs5029848	G	0.3862	0.4512	-0.0232	0.1572		103507	rs7644110	G	0.4189	0.4339	-0.0217	0.165		103507	rs7644110	G	0.4658	0.4341	-0.0217	0.165		103507	rs10865915	T	0.4228	0.4042	-0.0229
103662	2	193444627	193741261		-0.031	-0.0252	-0.02866	0.05997	0.1151	0.082094		103662	rs6758874	G	0.358	0.394	-0.0252	0.1151		103662	rs6758874	G	0.3525	0.3476	-0.0252	0.1151		103662	rs1373900	T	0.3458	0.3661	-0.031	0.05997		103662	rs1373900	T	0.411	0.3811	-0.031	0.05997		103662	rs12465720	T	0.3586	0.3903	-0.0309
103938	12	72056061	73882091		0.0202	0.0287	0.0236	0.06987	0.2005	0.145354		103938	rs10459281	C	0.4513	0.4096	0.0202	0.2005		103938	rs4882911	C	0.4185	0.311	0.0241	0.1256		103938	rs10785024	T	0.4268	0.3697	0.023	0.1585		103938	rs1520550	G	0.3836	0.3832	0.0287	0.06987		103938	rs10785038	G	0.3991	0.3914	0.022
104298	4	38364757	38688362	KLF3	0.0398	0.0398	0.0398	0.07807	0.07807	0.07807		104298	rs16994718	T	0.183	0.1554	0.0398	0.07807		104298	rs16994718	T	0.1531	0.122	0.0398	0.07807		104298	rs16994718	T	0.1586	0.14	0.0398	0.07807		104298	rs16994718	T	0.137	0.1407	0.0398	0.07807		104298	rs16994718	T	0.1632	0.1413	0.0398
104409	2	230705133	230996889	ENSG00000225963	0.0251	0.0349	0.03122	0.05435	0.1529	0.08731		104409	rs1549572	C	0.2742	0.255	0.0349	0.05435		104409	rs1549572	C	0.2935	0.2409	0.0349	0.05435		104409	rs1549572	C	0.2402	0.2394	0.0349	0.05435		104409	rs7599478	C	0.2671	0.3447	0.0251	0.1529		104409	rs6715401	G	0.2788	0.2882	0.0263
104464	1	111412261	111610738		0.0194	0.0252	0.02056	0.1233	0.236	0.21346		104464	rs11102208	C	0.3893	0.3731	0.0194	0.236		104464	rs1282288	C	0.4256	0.3405	0.0252	0.1233		104464	rs11102208	C	0.3948	0.3927	0.0194	0.236		104464	rs11102208	C	0.363	0.3614	0.0194	0.236		104464	rs11102208	C	0.4055	0.3861	0.0194
104717	9	79302033	80112213	GNA14,GNA14-AS1	-0.0306	-0.0266	-0.0298	0.06296	0.1293	0.076228		104717	rs2889774	A	0.3018	0.3298	-0.0306	0.06296		104717	rs2889774	A	0.3315	0.2957	-0.0306	0.06296		104717	rs2889774	A	0.2977	0.3358	-0.0306	0.06296		104717	rs2889774	A	0.2671	0.2952	-0.0306	0.06296		104717	rs10869927	C	0.3245	0.344	-0.0266
105021	13	27482648	28584648	FLT3	0.0318	0.0318	0.0318	0.07461	0.07461	0.07461		105021	rs17086212	C	0.2621	0.2862	0.0318	0.07461		105021	rs17086212	C	0.2402	0.25	0.0318	0.07461		105021	rs17086212	C	0.3048	0.2758	0.0318	0.07461		105021	rs17086212	C	0.3219	0.3273	0.0318	0.07461		105021	rs17086212	C	0.2706	0.237	0.0318
105075	12	126602165	128036212		-0.0485	-0.0459	-0.04642	0.05591	0.06013	0.056754		105075	rs11609868	A	0.1071	0.1336	-0.0459	0.05591		105075	rs345642	A	0.1166	0.1341	-0.0485	0.06013		105075	rs11609868	A	0.1061	0.1333	-0.0459	0.05591		105075	rs11609868	A	0.1164	0.1317	-0.0459	0.05591		105075	rs11609868	A	0.1027	0.1219	-0.0459
105569	12	126809861	128243908	ENSG00000286662	-0.0433	-0.0433	-0.0433	0.05157	0.05157	0.05157		105569	rs1367903	T	0.1616	0.1552	-0.0433	0.05157		105569	rs1367903	T	0.1517	0.1799	-0.0433	0.05157		105569	rs1367903	T	0.1536	0.1794	-0.0433	0.05157		105569	rs1367903	T	0.1438	0.1777	-0.0433	0.05157		105569	rs1367903	T	0.1596	0.1404	-0.0433
105999	3	117698800	119181490	ENSG00000239268	-0.0412	-0.0339	-0.03974	0.05182	0.1078	0.063016		105999	rs2605532	C	0.167	0.1796	-0.0412	0.05182		105999	rs2605532	C	0.1671	0.2012	-0.0412	0.05182		105999	rs2605532	C	0.1471	0.1812	-0.0412	0.05182		105999	rs2605532	C	0.1301	0.1916	-0.0412	0.05182		105999	rs2062513	C	0.1665	0.1754	-0.0339
106249	18	64204345	66095784	ENSG00000287907	-0.0327	-0.0205	-0.02576	0.1112	0.3169	0.22188		106249	rs17079031	G	0.1607	0.1918	-0.0327	0.1112		106249	rs17079031	G	0.1433	0.1921	-0.0327	0.1112		106249	rs12052002	C	0.1916	0.2224	-0.0219	0.2688		106249	rs9945966	T	0.1642	0.2125	-0.021	0.3169		106249	rs4891678	T	0.2043	0.1944	-0.0205
106288	3	109942107	111424797		-0.0298	-0.0298	-0.0298	0.05684	0.05684	0.05684		106288	rs716534	A	0.4589	0.4573	-0.0298	0.05684		106288	rs716534	A	0.4284	0.4909	-0.0298	0.05684		106288	rs716534	A	0.4938	0.4782	-0.0298	0.05684		106288	rs716534	A	0.4726	0.4311	-0.0298	0.05684		106288	rs716534	A	0.4656	0.4919	-0.0298
106570	9	11474608	11716567	ENSG00000285784	0.0194	0.0324	0.0281	0.0697	0.2729	0.134784		106570	rs13300485	C	0.2585	0.2378	0.0319	0.08536		106570	rs958842	C	0.243	0.1921	0.0249	0.1606		106570	rs10429476	G	0.2424	0.2558	0.0194	0.2729		106570	rs13300485	C	0.2847	0.2455	0.0319	0.08536		106570	rs10809491	C	0.2722	0.2532	0.0324
106617	4	25774403	26166250		-0.0316	-0.0251	-0.0297	0.05215	0.123	0.071402		106617	rs13115567	T	0.3509	0.367	-0.0306	0.06062		106617	rs13150492	G	0.389	0.4543	-0.0251	0.123		106617	rs12512100	A	0.3556	0.3388	-0.0316	0.05215		106617	rs13115567	T	0.3767	0.3832	-0.0306	0.06062		106617	rs13115567	T	0.3533	0.3238	-0.0306
106643	9	90870420	91680600	SHC3	0.0293	0.0293	0.0293	0.07724	0.07724	0.07724		106643	rs9410455	A	0.3134	0.2894	0.0293	0.07724		106643	rs9410455	A	0.3244	0.375	0.0293	0.07724		106643	rs9410455	A	0.3045	0.3	0.0293	0.07724		106643	rs9410455	A	0.3056	0.3515	0.0293	0.07724		106643	rs9410455	A	0.3424	0.3064	0.0293
106731	6	152129077	152197890	ESR1	-0.0319	-0.0172	-0.02014	0.05222	0.2658	0.223084		106731	rs2077647	C	0.4679	0.4867	-0.0319	0.05222		106731	rs827423	G	0.493	0.4909	-0.0172	0.2658		106731	rs827423	G	0.4964	0.4988	-0.0172	0.2658		106731	rs827423	G	0.4315	0.494	-0.0172	0.2658		106731	rs827423	G	0.4889	0.483	-0.0172
106834	18	45757577	47503579	MYO5B	0.0299	0.0299	0.0299	0.08018	0.08018	0.08018		106834	rs4939924	C	0.3464	0.3309	0.0299	0.08018		106834	rs4939924	C	0.309	0.3323	0.0299	0.08018		106834	rs4939924	C	0.3048	0.3358	0.0299	0.08018		106834	rs4939924	C	0.3493	0.3204	0.0299	0.08018		106834	rs4939924	C	0.3247	0.2882	0.0299
106857	4	119831193	120094940	SYNPO2	-0.0444	-0.0179	-0.03738	0.05823	0.4707	0.152278		106857	rs12506322	A	0.1223	0.1353	-0.0444	0.05823		106857	rs12506322	A	0.1699	0.1616	-0.0444	0.05823		106857	rs1387981	A	0.09091	0.1182	-0.0179	0.4707		106857	rs12506322	A	0.1233	0.1138	-0.0444	0.05823		106857	rs10015173	A	0.1472	0.1335	-0.0358
107517	16	16932260	17025608		0.038	0.0398	0.03908	0.08926	0.1068	0.096276		107517	rs12708807	G	0.1312	0.1147	0.038	0.1068		107517	rs12708807	G	0.1433	0.09146	0.038	0.1068		107517	rs6498640	C	0.1355	0.1148	0.0398	0.08926		107517	rs6498640	C	0.137	0.1228	0.0398	0.08926		107517	rs6498640	C	0.1271	0.1293	0.0398
107602	12	118113415	119632307	HSPB8	0.0163	0.0326	0.02216	0.05805	0.3619	0.24017		107602	rs11038	G	0.2991	0.2738	0.0201	0.2564		107602	rs6490244	G	0.2654	0.2713	0.0163	0.3619		107602	rs6490244	G	0.279	0.2745	0.0163	0.3619		107602	rs6490242	T	0.226	0.2964	0.0326	0.05805		107602	rs11064698	C	0.2862	0.2527	0.0255
107843	1	238382591	240315968	FMN2	-0.0234	-0.0169	-0.02118	0.135	0.2967	0.18098		107843	rs17669357	G	0.4607	0.4789	-0.0234	0.135		107843	rs10495459	G	0.4522	0.4726	-0.0226	0.1415		107843	rs10495459	G	0.4474	0.4788	-0.0226	0.1415		107843	rs6667904	G	0.4863	0.482	-0.0204	0.1902		107843	rs10926141	C	0.4793	0.4847	-0.0169
108092	17	69677322	72166683		0.0262	0.0337	0.0292	0.05299	0.117	0.091396		108092	rs6501697	C	0.4562	0.4211	0.0262	0.117		108092	rs6501697	C	0.4494	0.4695	0.0262	0.117		108092	rs6501697	C	0.4269	0.4209	0.0262	0.117		108092	rs9891121	C	0.4932	0.4731	0.0337	0.05299		108092	rs9891121	C	0.4714	0.4372	0.0337
108304	12	130766115	132200162	SFSWAP	0.0304	0.0304	0.0304	0.0736	0.0736	0.0736		108304	rs10794423	C	0.4902	0.4673	0.0304	0.0736		108304	rs10794423	C	0.4424	0.4085	0.0304	0.0736		108304	rs10794423	C	0.4412	0.4085	0.0304	0.0736		108304	rs10794423	C	0.4041	0.3952	0.0304	0.0736		108304	rs10794423	C	0.4374	0.4123	0.0304
108330	3	120179752	121668702	ENSG00000286735	0.0272	0.0286	0.02832	0.08163	0.1079	0.086884		108330	rs1259309	A	0.3554	0.3614	0.0286	0.08163		108330	rs1259309	A	0.3441	0.2927	0.0286	0.08163		108330	rs1259312	C	0.3565	0.3242	0.0272	0.1079		108330	rs1259309	A	0.3082	0.3114	0.0286	0.08163		108330	rs1259309	A	0.3675	0.339	0.0286
108368	1	110888973	111087450	KCNA2	0.007	0.0218	0.01508	0.174	0.6775	0.39054		108368	rs12748140	C	0.3482	0.3187	0.0124	0.4636		108368	rs12748140	C	0.3469	0.3049	0.0124	0.4636		108368	rs2246702	A	0.3485	0.3527	0.0218	0.174		108368	rs2246702	A	0.2945	0.3743	0.0218	0.174		108368	rs11579598	T	0.3543	0.3264	0.007
108377	8	104368673	104442682		-0.0328	-0.0295	-0.03018	0.07357	0.1174	0.102094		108377	rs10105450	G	0.2107	0.2478	-0.0295	0.1065		108377	rs10105450	G	0.1742	0.2104	-0.0295	0.1065		108377	rs10105450	G	0.1996	0.2479	-0.0295	0.1065		108377	rs7845210	C	0.2123	0.2515	-0.0328	0.07357		108377	rs17802416	T	0.2305	0.2093	-0.0296
108453	7	68522013	68884077	ENSG00000225718	0.0226	0.0282	0.02404	0.07571	0.1673	0.142862		108453	rs10447529	C	0.4152	0.3697	0.0226	0.1673		108453	rs2965447	T	0.3479	0.3933	0.0234	0.152		108453	rs10447529	C	0.3984	0.3533	0.0226	0.1673		108453	rs2965447	T	0.363	0.3855	0.0234	0.152		108453	rs2938498	G	0.3735	0.3804	0.0282
108625	11	28021060	28360360	KIF18A	0.0504	0.0667	0.05676	0.06943	0.234	0.183326		108625	rs10835263	G	0.05625	0.04379	0.0557	0.1561		108625	rs11030281	G	0.05618	0.03659	0.0555	0.234		108625	rs12272419	C	0.03936	0.04202	0.0504	0.2231		108625	rs11030281	G	0.02055	0.02695	0.0555	0.234		108625	rs10767686	T	0.05526	0.03881	0.0667
108643	10	43435719	44142466	ZNF32-AS3	0.0193	0.0338	0.02986	0.05329	0.2769	0.105182		108643	rs10736822	C	0.2982	0.2788	0.0318	0.07303		108643	rs10751327	A	0.3315	0.2957	0.0306	0.0694		108643	rs10793454	T	0.2647	0.2939	0.0193	0.2769		108643	rs10751328	A	0.363	0.2994	0.0338	0.05329		108643	rs10751328	A	0.2976	0.2835	0.0338
108747	5	61607268	61909886	IPO11,ENSG00000288643	0.0042	0.0158	0.00944	0.3317	0.7979	0.58112		108747	rs153857	G	0.3527	0.3359	0.0158	0.3317		108747	rs181912	G	0.361	0.2744	0.0142	0.3846		108747	rs10471545	A	0.3191	0.3212	0.0042	0.7979		108747	rs10471545	A	0.2431	0.3037	0.0042	0.7979		108747	rs10051492	G	0.3376	0.3259	0.0088
108914	13	94554036	95758325	ABCC4	-0.0285	-0.0244	-0.02556	0.06737	0.1163	0.10254		108914	rs1678363	C	0.4311	0.4507	-0.0285	0.06737		108914	rs1729760	G	0.4719	0.4512	-0.0261	0.09643		108914	rs1630807	C	0.4371	0.4732	-0.0244	0.1163		108914	rs1630807	C	0.4521	0.4072	-0.0244	0.1163		108914	rs1630807	C	0.4524	0.4459	-0.0244
108917	16	6878430	6944189	RBFOX1	-0.0278	-0.0166	-0.02168	0.1032	0.3425	0.21636		108917	rs1473519	G	0.2955	0.3331	-0.0195	0.2384		108917	rs1473519	G	0.3272	0.2652	-0.0195	0.2384		108917	rs11077103	G	0.2861	0.2976	-0.0278	0.1032		108917	rs7191719	A	0.2671	0.2904	-0.025	0.1593		108917	rs12920700	G	0.2836	0.2833	-0.0166
109281	14	71766373	72705544	RGS6	-0.0295	-0.0258	-0.0284	0.06734	0.1067	0.08064		109281	rs2158988	A	0.3741	0.3713	-0.0289	0.07198		109281	rs847275	A	0.4115	0.3933	-0.0295	0.06734		109281	rs2158988	A	0.3497	0.3825	-0.0289	0.07198		109281	rs847268	C	0.3288	0.3593	-0.0289	0.0852		109281	rs6574054	C	0.3654	0.407	-0.0258
109745	4	163540150	163944294	ENSG00000248431	-0.0316	-0.0191	-0.025	0.06828	0.2697	0.166576		109745	rs10517773	T	0.2705	0.2755	-0.0276	0.1203		109745	rs10517773	T	0.3034	0.3598	-0.0276	0.1203		109745	rs10005373	G	0.2576	0.2921	-0.0316	0.06828		109745	rs1903291	A	0.3562	0.2831	-0.0191	0.2543		109745	rs10032701	G	0.2889	0.3165	-0.0191
109967	11	85434781	85783738	PICALM	0.0222	0.035	0.02652	0.054	0.2128	0.15076		109967	rs1941375	C	0.2991	0.2622	0.0222	0.2128		109967	rs621942	A	0.2711	0.2409	0.0266	0.1371		109967	rs1941375	C	0.2665	0.2533	0.0222	0.2128		109967	rs621942	A	0.2465	0.2048	0.0266	0.1371		109967	rs681041	A	0.2392	0.2133	0.035
110498	5	149481996	149501803	PDGFRB	-0.0329	-0.0329	-0.0329	0.05431	0.05431	0.05431		110498	rs17656204	T	0.3259	0.3093	-0.0329	0.05431		110498	rs17656204	T	0.3048	0.3628	-0.0329	0.05431		110498	rs17656204	T	0.2959	0.343	-0.0329	0.05431		110498	rs17656204	T	0.3151	0.2814	-0.0329	0.05431		110498	rs17656204	T	0.3186	0.3199	-0.0329
110674	2	240309844	240644907		-0.0415	-0.0415	-0.0415	0.05484	0.05484	0.05484		110674	rs11891511	G	0.1946	0.2084	-0.0415	0.05484		110674	rs11891511	G	0.1896	0.25	-0.0415	0.05484		110674	rs11891511	G	0.1952	0.1976	-0.0415	0.05484		110674	rs11891511	G	0.1781	0.1988	-0.0415	0.05484		110674	rs11891511	G	0.196	0.1944	-0.0415
111212	2	176107060	176399046		0.0301	0.0329	0.03174	0.05756	0.08421	0.068252		111212	rs2177250	A	0.3045	0.2899	0.0301	0.08421		111212	rs2177250	A	0.2598	0.2774	0.0301	0.08421		111212	rs1522829	A	0.2848	0.2473	0.0328	0.05764		111212	rs1522829	A	0.1918	0.2395	0.0328	0.05764		111212	rs10207413	G	0.2716	0.2648	0.0329
111332	12	50579767	52293500		-0.0289	-0.0289	-0.0289	0.08597	0.08597	0.08597		111332	rs3847859	A	0.3964	0.3664	-0.0289	0.08597		111332	rs3847859	A	0.3624	0.4329	-0.0289	0.08597		111332	rs3847859	A	0.3696	0.3952	-0.0289	0.08597		111332	rs3847859	A	0.4041	0.4036	-0.0289	0.08597		111332	rs3847859	A	0.3596	0.4005	-0.0289
111365	2	118610597	118894127	THORLNC	-0.0337	-0.0337	-0.0337	0.1047	0.1047	0.1047		111365	rs7593540	T	0.1795	0.1984	-0.0337	0.1047		111365	rs7593540	T	0.1784	0.2348	-0.0337	0.1047		111365	rs7593540	T	0.1889	0.1782	-0.0337	0.1047		111365	rs7593540	T	0.2123	0.1916	-0.0337	0.1047		111365	rs7593540	T	0.1834	0.1858	-0.0337
111554	19	8337581	8453822	ANGPTL4	0.0279	0.0289	0.0287	0.07515	0.09343	0.084826		111554	rs2278236	G	0.5	0.464	0.0289	0.07515		111554	rs7254882	T	0.486	0.4726	0.0289	0.0902		111554	rs2278236	G	0.483	0.4752	0.0289	0.07515		111554	rs7254882	T	0.4931	0.4096	0.0289	0.0902		111554	rs11666233	C	0.473	0.4946	0.0279
111578	11	81205840	81536997		-0.036	-0.0298	-0.0341	0.1014	0.1488	0.11198		111578	rs11232882	A	0.1679	0.1541	-0.0349	0.1014		111578	rs11232882	A	0.1812	0.1799	-0.0349	0.1014		111578	rs10501526	T	0.131	0.1428	-0.036	0.1069		111578	rs1459942	A	0.1438	0.1886	-0.0298	0.1488		111578	rs11232882	A	0.1807	0.16	-0.0349
111675	3	43984463	44056898		0.0157	0.0202	0.0175	0.2734	0.3874	0.3418		111675	rs11718455	T	0.2714	0.2519	0.0202	0.2734		111675	rs11718455	T	0.2598	0.2287	0.0202	0.2734		111675	rs11130020	T	0.2442	0.2758	0.0157	0.3874		111675	rs11130020	T	0.1901	0.2713	0.0157	0.3874		111675	rs11130020	T	0.2777	0.2394	0.0157
112211	11	114201133	114695923		0.0267	0.0328	0.02914	0.05523	0.1072	0.086412		112211	rs10790047	G	0.3402	0.3219	0.0267	0.1072		112211	rs10790047	G	0.3127	0.3241	0.0267	0.1072		112211	rs10790047	G	0.3241	0.3191	0.0267	0.1072		112211	rs12279327	C	0.3425	0.3563	0.0328	0.05523		112211	rs12279327	C	0.3342	0.2916	0.0328
112273	1	164862316	166579080	FMO9P	0.0192	0.0313	0.0224	0.05527	0.2338	0.179194		112273	rs530690	T	0.4223	0.4218	0.0192	0.2338		112273	rs530690	T	0.4045	0.3354	0.0192	0.2338		112273	rs1631056	C	0.4376	0.4036	0.0313	0.05527		112273	rs530690	T	0.4178	0.4431	0.0192	0.2338		112273	rs454751	T	0.4174	0.4311	0.0231
112277	5	71266713	71335991		-0.0367	-0.0326	-0.03522	0.07167	0.0975	0.080684		112277	rs2662317	T	0.1839	0.2018	-0.0356	0.08126		112277	rs2662317	T	0.1742	0.2378	-0.0356	0.08126		112277	rs1010949	T	0.1765	0.2091	-0.0367	0.07173		112277	rs7704592	C	0.1644	0.1826	-0.0326	0.0975		112277	rs10075867	G	0.1893	0.192	-0.0356
112456	14	36653653	37588420	SLC25A21	0.0519	0.062	0.05526	0.06286	0.1247	0.100682		112456	rs2415385	T	0.0644	0.06737	0.0519	0.1247		112456	rs2415385	T	0.07865	0.03354	0.0519	0.1247		112456	rs11846358	T	0.07041	0.05273	0.0571	0.08425		112456	rs7153409	A	0.06849	0.05422	0.0534	0.1069		112456	rs10139302	C	0.06283	0.0651	0.062
112892	9	115199244	116162760	ALAD	0.0294	0.0354	0.0306	0.09657	0.1547	0.143074		112892	rs818684	T	0.1821	0.1691	0.0294	0.1547		112892	rs818689	T	0.1643	0.1433	0.0354	0.09657		112892	rs818684	T	0.1988	0.1612	0.0294	0.1547		112892	rs818684	T	0.1438	0.1707	0.0294	0.1547		112892	rs818684	T	0.195	0.1682	0.0294
113052	3	82469026	82551716	LINC02008	-0.0325	-0.028	-0.0298	0.05568	0.1003	0.082452		113052	rs9309903	A	0.2787	0.3198	-0.0325	0.05568		113052	rs9309903	A	0.3048	0.3598	-0.0325	0.05568		113052	rs6548816	G	0.2825	0.2939	-0.028	0.1003		113052	rs6548816	G	0.3288	0.3204	-0.028	0.1003		113052	rs6548816	G	0.2852	0.3067	-0.028
113127	12	67597320	69311053	CPM	-0.0206	-0.0206	-0.0206	0.2048	0.2048	0.2048		113127	rs1565862	C	0.3893	0.4157	-0.0206	0.2048		113127	rs1565862	C	0.4101	0.3994	-0.0206	0.2048		113127	rs1565862	C	0.3824	0.3902	-0.0206	0.2048		113127	rs1565862	C	0.4452	0.4371	-0.0206	0.2048		113127	rs1565862	C	0.3891	0.4231	-0.0206
113144	7	116707214	116920970	WNT2	0.0259	0.0286	0.02806	0.07096	0.1169	0.080148		113144	rs2896218	G	0.4321	0.4102	0.0286	0.07096		113144	rs916725	T	0.389	0.3963	0.0259	0.1169		113144	rs2896218	G	0.4358	0.3921	0.0286	0.07096		113144	rs2896218	G	0.4384	0.4281	0.0286	0.07096		113144	rs2896218	G	0.413	0.4464	0.0286
113224	14	91400543	92330790	TC2N	0.0328	0.0347	0.03394	0.1128	0.131	0.12008		113224	rs17127600	G	0.1467	0.174	0.0328	0.131		113224	rs17127600	G	0.1306	0.1555	0.0328	0.131		113224	rs10142528	C	0.1732	0.1455	0.0347	0.1128		113224	rs10142528	C	0.1781	0.1407	0.0347	0.1128		113224	rs10142528	C	0.1793	0.1521	0.0347
113235	3	127419578	128928628	MGLL	-0.0409	-0.0338	-0.0375	0.1152	0.2203	0.16226		113235	rs16826716	T	0.08839	0.1003	-0.0338	0.2203		113235	rs7633484	G	0.0941	0.07927	-0.0381	0.1403		113235	rs16826716	T	0.09091	0.09041	-0.0338	0.2203		113235	rs2276745	A	0.08904	0.0988	-0.0409	0.1152		113235	rs2276745	A	0.08885	0.1181	-0.0409
113304	11	27101581	27169729	BBOX1,BBOX1-AS1	0.0318	0.041	0.03916	0.05925	0.169	0.0812		113304	rs3781677	A	0.1482	0.1336	0.041	0.05925		113304	rs3781677	A	0.1643	0.1433	0.041	0.05925		113304	rs3781677	A	0.1292	0.1467	0.041	0.05925		113304	rs3781677	A	0.1438	0.1205	0.041	0.05925		113304	rs1020274	G	0.1261	0.149	0.0318
113786	6	39699399	39807377		-0.027	-0.027	-0.027	0.07928	0.07928	0.07928		113786	rs303648	A	0.4464	0.4562	-0.027	0.07928		113786	rs303648	A	0.4242	0.4695	-0.027	0.07928		113786	rs303648	A	0.4528	0.4685	-0.027	0.07928		113786	rs303648	A	0.4932	0.4581	-0.027	0.07928		113786	rs303648	A	0.4563	0.4848	-0.027
113800	5	1499175	1556205	LPCAT1	0.0203	0.0213	0.0209	0.1826	0.2079	0.19272		113800	rs36982	T	0.4446	0.4169	0.0203	0.2079		113800	rs36987	T	0.382	0.439	0.0213	0.1826		113800	rs36982	T	0.41	0.4067	0.0203	0.2079		113800	rs36987	T	0.4452	0.4521	0.0213	0.1826		113800	rs36987	T	0.4262	0.3959	0.0213
114000	14	21324930	22255090		0.0209	0.0239	0.0223	0.1493	0.2047	0.17698		114000	rs12890321	A	0.3479	0.316	0.0231	0.1591		114000	rs7143791	C	0.3301	0.2866	0.0239	0.1493		114000	rs12437386	G	0.3396	0.324	0.0209	0.2047		114000	rs12437386	G	0.3356	0.3114	0.0209	0.2047		114000	rs10483257	G	0.3375	0.3052	0.0227
114232	5	146597598	146630049	STK32A	0.0327	0.0389	0.03394	0.05635	0.09746	0.089238		114232	rs10515579	G	0.2036	0.1809	0.0389	0.05635		114232	rs31039	G	0.1924	0.1677	0.0327	0.09746		114232	rs31039	G	0.2255	0.1976	0.0327	0.09746		114232	rs31039	G	0.2466	0.1766	0.0327	0.09746		114232	rs31039	G	0.2145	0.1864	0.0327
114698	11	21490388	21534059	NELL1	-0.0305	-0.022	-0.0288	0.05659	0.1558	0.076432		114698	rs11026120	G	0.4768	0.4994	-0.0305	0.05659		114698	rs4550216	A	0.4916	0.4787	-0.022	0.1558		114698	rs11026120	G	0.4777	0.4878	-0.0305	0.05659		114698	rs11026120	G	0.4795	0.476	-0.0305	0.05659		114698	rs11026120	G	0.4995	0.5	-0.0305
114763	18	66178341	68029763		-0.0292	-0.0257	-0.0275	0.09924	0.1434	0.121896		114763	rs2439268	A	0.2773	0.2982	-0.0257	0.1434		114763	rs2439268	A	0.2809	0.2896	-0.0257	0.1434		114763	rs2711407	C	0.2638	0.2958	-0.0292	0.09924		114763	rs2711407	C	0.2534	0.2934	-0.0292	0.09924		114763	rs2244420	G	0.2889	0.2939	-0.0277
115056	12	12096749	12210188	BCL2L14	-0.0337	-0.0252	-0.03004	0.05831	0.147	0.094982		115056	rs10845463	T	0.3077	0.3453	-0.0337	0.05831		115056	rs10845463	T	0.302	0.372	-0.0337	0.05831		115056	rs1641714	A	0.2781	0.2925	-0.0252	0.147		115056	rs1641714	A	0.3151	0.2725	-0.0252	0.147		115056	rs10772528	G	0.3325	0.3354	-0.0324
115411	2	6783934	6866483		0.0384	0.0705	0.04562	0.05699	0.2624	0.213218		115411	rs13382813	A	0.05625	0.04712	0.0414	0.2316		115411	rs16865531	C	0.05056	0.04573	0.0394	0.2527		115411	rs13413734	G	0.05971	0.04364	0.0384	0.2624		115411	rs13413734	G	0.07534	0.02108	0.0384	0.2624		115411	rs10460291	A	0.0535	0.06306	0.0705
115442	9	28816601	28855155		-0.04	-0.0318	-0.03358	0.1742	0.2953	0.26702		115442	rs1389728	C	0.06631	0.08768	-0.0318	0.2953		115442	rs1389728	C	0.07163	0.08232	-0.0318	0.2953		115442	rs13297297	A	0.06684	0.07636	-0.0325	0.275		115442	rs1389728	C	0.08219	0.0988	-0.0318	0.2953		115442	rs10491629	T	0.06529	0.08468	-0.04
115474	3	194440887	195921197	ENSG00000233987,LINC01968	-0.0259	-0.0178	-0.01984	0.1105	0.2894	0.24132		115474	rs12695041	C	0.308	0.3707	-0.0185	0.2689		115474	rs12695042	A	0.3413	0.4024	-0.0178	0.2894		115474	rs1461774	A	0.344	0.3339	-0.0259	0.1105		115474	rs12695041	C	0.3425	0.3623	-0.0185	0.2689		115474	rs12695041	C	0.3289	0.339	-0.0185
115607	11	101883770	102378560		0.0357	0.0357	0.0357	0.05708	0.05708	0.05708		115607	rs1954850	C	0.2446	0.2278	0.0357	0.05708		115607	rs1954850	C	0.2331	0.2866	0.0357	0.05708		115607	rs1954850	C	0.2616	0.2591	0.0357	0.05708		115607	rs1954850	C	0.2397	0.1886	0.0357	0.05708		115607	rs1954850	C	0.2734	0.203	0.0357
115819	1	192597323	194329737		0.0388	0.0438	0.04208	0.0625	0.0917	0.071542		115819	rs6428220	T	0.1357	0.122	0.0438	0.0625		115819	rs7515996	G	0.1278	0.08537	0.0402	0.07851		115819	rs10754097	A	0.1257	0.1139	0.0388	0.0917		115819	rs6428220	T	0.09722	0.1506	0.0438	0.0625		115819	rs6428220	T	0.1284	0.1116	0.0438
116046	16	18760850	18843309	SMG1	-0.0162	-0.0157	-0.0159	0.3204	0.3361	0.32968		116046	rs11649439	C	0.3786	0.4002	-0.0162	0.3204		116046	rs12445870	C	0.368	0.4299	-0.0159	0.33		116046	rs2270849	C	0.3815	0.3964	-0.0158	0.3319		116046	rs12445870	C	0.4658	0.3802	-0.0159	0.33		116046	rs11640850	A	0.4056	0.3788	-0.0157
116231	2	197605805	197897560	ANKRD44	-0.0335	-0.028	-0.0313	0.07419	0.163	0.109714		116231	rs10497802	T	0.2	0.2189	-0.028	0.163		116231	rs10497802	T	0.2051	0.1902	-0.028	0.163		116231	rs13426748	G	0.1982	0.1994	-0.0335	0.07419		116231	rs13426748	G	0.1849	0.1886	-0.0335	0.07419		116231	rs13426748	G	0.2066	0.2352	-0.0335
116462	9	1651432	1661432		-0.0287	-0.0287	-0.0287	0.07111	0.07111	0.07111		116462	rs2476245	A	0.3527	0.3764	-0.0287	0.07111		116462	rs2476245	A	0.3385	0.3049	-0.0287	0.07111		116462	rs2476245	A	0.352	0.3927	-0.0287	0.07111		116462	rs2476245	A	0.3356	0.3743	-0.0287	0.07111		116462	rs2476245	A	0.3824	0.3782	-0.0287
117463	5	24567660	24617887	CDH10,ENSG00000251294	-0.0244	-0.0104	-0.0165	0.1233	0.5038	0.31382		117463	rs10805767	A	0.4786	0.4956	-0.0104	0.5038		117463	rs13174538	G	0.486	0.4695	-0.0244	0.1233		117463	rs10942061	T	0.4813	0.4867	-0.0165	0.2982		117463	rs12516067	G	0.4795	0.479	-0.0138	0.3701		117463	rs10755287	T	0.4847	0.4883	-0.0174
117475	1	199270229	201013947	KIF21B	-0.0295	-0.021	-0.0239	0.06112	0.1753	0.136544		117475	rs10920090	C	0.433	0.4506	-0.024	0.1355		117475	rs10920090	C	0.4256	0.497	-0.024	0.1355		117475	rs10920099	G	0.4822	0.4642	-0.021	0.1753		117475	rs10920099	G	0.4726	0.485	-0.021	0.1753		117475	rs10494827	C	0.48	0.4937	-0.0295
117504	1	156036865	157798000		-0.0264	-0.0171	-0.02212	0.09747	0.2743	0.172708		117504	rs2765493	G	0.4884	0.4884	-0.0226	0.1432		117504	rs6689427	G	0.4242	0.4665	-0.0181	0.2511		117504	rs2050568	T	0.4314	0.466	-0.0264	0.09747		117504	rs2050568	T	0.4589	0.4731	-0.0264	0.09747		117504	rs10443905	C	0.3973	0.4283	-0.0171
117917	18	48098425	49844427		-0.0234	-0.0197	-0.02044	0.17	0.2434	0.22872		117917	rs1373179	C	0.3295	0.3503	-0.0197	0.2434		117917	rs9304421	A	0.3441	0.3018	-0.0234	0.17		117917	rs1373179	C	0.328	0.3303	-0.0197	0.2434		117917	rs1373179	C	0.3562	0.3772	-0.0197	0.2434		117917	rs1373179	C	0.3087	0.3541	-0.0197
118557	10	37030676	37075685		-0.0292	-0.0273	-0.02768	0.07417	0.1051	0.098914		118557	rs10437422	C	0.3145	0.33	-0.0292	0.07417		118557	rs10827697	C	0.316	0.3567	-0.0273	0.1051		118557	rs10827697	C	0.3093	0.3402	-0.0273	0.1051		118557	rs10827697	C	0.3082	0.3024	-0.0273	0.1051		118557	rs10827697	C	0.3008	0.3346	-0.0273
118687	2	56981784	57138726		-0.029	-0.0152	-0.023	0.05878	0.3375	0.165492		118687	rs13033180	C	0.483	0.4895	-0.029	0.05878		118687	rs17698880	A	0.4789	0.4663	-0.02	0.1975		118687	rs12467061	C	0.4982	0.4988	-0.0152	0.3375		118687	rs13033180	C	0.4514	0.497	-0.029	0.05878		118687	rs12622513	A	0.4744	0.4964	-0.0218
119537	11	88016449	88398458	GRM5	0.0629	0.1014	0.0937	0.05921	0.1777	0.082908		119537	rs10831251	T	0.03482	0.02439	0.1014	0.05921		119537	rs10831251	T	0.02528	0.01829	0.1014	0.05921		119537	rs1354411	G	0.0303	0.02545	0.0629	0.1777		119537	rs10831251	T	0.02055	0.04192	0.1014	0.05921		119537	rs10831251	T	0.03465	0.0217	0.1014
119617	11	23831740	23901749		-0.0522	-0.039	-0.04666	0.1693	0.2857	0.21796		119617	rs10400331	T	0.03304	0.04435	-0.0433	0.2435		119617	rs10834213	A	0.05618	0.02744	-0.0471	0.2059		119617	rs11027570	T	0.04813	0.03576	-0.0517	0.1854		119617	rs4480547	G	0.02055	0.03892	-0.0522	0.1693		119617	rs10834214	C	0.04478	0.05776	-0.039
119694	6	83828254	83880167	DOP1A	-0.0328	-0.0225	-0.02686	0.07278	0.2214	0.159892		119694	rs2148011	G	0.2152	0.2378	-0.0328	0.07278		119694	rs2148011	G	0.2303	0.2012	-0.0328	0.07278		119694	rs4515348	C	0.2139	0.2515	-0.0237	0.2111		119694	rs473267	T	0.2055	0.3042	-0.0225	0.2214		119694	rs473267	T	0.2513	0.2531	-0.0225
119906	3	2447785	2486040	CNTN4	0.0297	0.032	0.03074	0.06036	0.07148	0.06593		119906	rs2134357	G	0.3339	0.3115	0.0297	0.07148		119906	rs2134357	G	0.3062	0.3293	0.0297	0.07148		119906	rs2134358	G	0.3235	0.3018	0.0303	0.06597		119906	rs2653495	A	0.2945	0.3443	0.032	0.06036		119906	rs2653495	A	0.3323	0.3023	0.032
120004	20	19088741	19140741		-0.0289	-0.0289	-0.0289	0.06715	0.06715	0.06715		120004	rs6035244	A	0.3851	0.4067	-0.0289	0.06715		120004	rs6035244	A	0.3761	0.3659	-0.0289	0.06715		120004	rs6035244	A	0.3601	0.403	-0.0289	0.06715		120004	rs6035244	A	0.3836	0.3892	-0.0289	0.06715		120004	rs6035244	A	0.3807	0.3964	-0.0289
120268	8	58859213	59021767	LINC01602	-0.0272	-0.0262	-0.0268	0.08012	0.09297	0.08526		120268	rs10957028	G	0.4464	0.4651	-0.0272	0.08012		120268	rs10957028	G	0.4607	0.4329	-0.0272	0.08012		120268	rs10957028	G	0.4055	0.4685	-0.0272	0.08012		120268	rs6471662	C	0.4041	0.3705	-0.0262	0.09297		120268	rs6471662	C	0.4326	0.3987	-0.0262
120397	5	169714568	169781990	KCNIP1	-0.0309	-0.0309	-0.0309	0.05967	0.05967	0.05967		120397	rs6860569	A	0.3071	0.3248	-0.0309	0.05967		120397	rs6860569	A	0.3525	0.3506	-0.0309	0.05967		120397	rs6860569	A	0.2968	0.3279	-0.0309	0.05967		120397	rs6860569	A	0.3219	0.3323	-0.0309	0.05967		120397	rs6860569	A	0.3388	0.3038	-0.0309
120808	4	88777743	89008164		-0.0289	-0.0205	-0.02304	0.06085	0.1962	0.15191		120808	rs1026663	T	0.4634	0.4202	-0.0205	0.1962		120808	rs1026663	T	0.4284	0.5	-0.0205	0.1962		120808	rs1026663	T	0.4234	0.4509	-0.0205	0.1962		120808	rs7655902	C	0.5	0.4699	-0.0248	0.1101		120808	rs4147246	C	0.4159	0.4467	-0.0289
120864	14	51796110	52726360		-0.0328	-0.024	-0.02746	0.09486	0.2193	0.171812		120864	rs802972	A	0.1946	0.2045	-0.0328	0.09486		120864	rs809722	T	0.1952	0.2683	-0.024	0.2193		120864	rs809722	T	0.221	0.2085	-0.024	0.2193		120864	rs809722	T	0.2192	0.2126	-0.024	0.2193		120864	rs802973	G	0.1951	0.2165	-0.0325
121229	3	144868289	146365862		0.0252	0.0318	0.02652	0.09454	0.1958	0.175548		121229	rs9868905	G	0.2213	0.2052	0.0252	0.1958		121229	rs9868905	G	0.2458	0.2073	0.0252	0.1958		121229	rs6797159	A	0.2326	0.2036	0.0318	0.09454		121229	rs9868905	G	0.2083	0.2156	0.0252	0.1958		121229	rs9868905	G	0.2168	0.2181	0.0252
121771	5	51501150	51628612		0.0229	0.0286	0.0264	0.07026	0.1522	0.097002		121771	rs13172532	T	0.4607	0.4418	0.0286	0.07172		121771	rs933779	T	0.4621	0.4543	0.0229	0.1522		121771	rs10940239	A	0.4964	0.4382	0.0279	0.07026		121771	rs4572960	C	0.4658	0.4281	0.0259	0.102		121771	rs12522991	T	0.4533	0.4571	0.0267
121781	15	72986945	75193004	SCAMP2	-0.0278	-0.0213	-0.0243	0.07143	0.1761	0.121086		121781	rs11072511	A	0.4518	0.4701	-0.0213	0.1761		121781	rs6495122	A	0.3862	0.3994	-0.0248	0.1105		121781	rs11856413	A	0.4545	0.4709	-0.0278	0.07143		121781	rs1127796	T	0.4863	0.4488	-0.0238	0.1237		121781	rs1127796	T	0.434	0.4712	-0.0238
122223	2	41923939	42068896		0.026	0.0287	0.02658	0.06498	0.09341	0.087256		122223	rs4608574	C	0.4794	0.4595	0.026	0.09341		122223	rs4608574	C	0.486	0.4787	0.026	0.09341		122223	rs10185983	G	0.4893	0.4545	0.0262	0.09107		122223	rs4608574	C	0.4384	0.4789	0.026	0.09341		122223	rs11692115	G	0.4836	0.4901	0.0287
122678	17	7192872	7252148	ACAP1	-0.0305	-0.0305	-0.0305	0.06096	0.06096	0.06096		122678	rs2292067	T	0.333	0.3742	-0.0305	0.06096		122678	rs2292067	T	0.3169	0.378	-0.0305	0.06096		122678	rs2292067	T	0.3602	0.365	-0.0305	0.06096		122678	rs2292067	T	0.3562	0.3584	-0.0305	0.06096		122678	rs2292067	T	0.3713	0.3441	-0.0305
123026	10	48047252	48427246	GDF10	0.0249	0.0249	0.0249	0.1346	0.1346	0.1346		123026	rs762454	C	0.3429	0.3259	0.0249	0.1346		123026	rs762454	C	0.3414	0.3384	0.0249	0.1346		123026	rs762454	C	0.344	0.3121	0.0249	0.1346		123026	rs762454	C	0.3562	0.4096	0.0249	0.1346		123026	rs762454	C	0.3439	0.3223	0.0249
124042	3	14607715	14632711		0.0228	0.0228	0.0228	0.2441	0.2441	0.2441		124042	rs4462948	T	0.2268	0.2073	0.0228	0.2441		124042	rs4462948	T	0.2121	0.2165	0.0228	0.2441		124042	rs4462948	T	0.221	0.2051	0.0228	0.2441		124042	rs4462948	T	0.2808	0.2365	0.0228	0.2441		124042	rs4462948	T	0.2352	0.2108	0.0228
124160	13	111652791	112608187		0.0324	0.0338	0.03352	0.07343	0.1014	0.079024		124160	rs2146443	G	0.2411	0.194	0.0338	0.07343		124160	rs2146443	G	0.2402	0.1982	0.0338	0.07343		124160	rs2146443	G	0.2184	0.2139	0.0338	0.07343		124160	rs2146443	G	0.1918	0.2259	0.0338	0.07343		124160	rs1886187	A	0.2353	0.2039	0.0324
124170	1	192618219	194351596		-0.0399	-0.0293	-0.03478	0.06532	0.1757	0.117348		124170	rs10921548	G	0.1661	0.1669	-0.0377	0.08501		124170	rs6700148	A	0.169	0.1472	-0.0293	0.1757		124170	rs10921548	G	0.1333	0.1663	-0.0377	0.08501		124170	rs6700148	A	0.1781	0.1333	-0.0293	0.1757		124170	rs12097214	C	0.1644	0.1912	-0.0399
124513	2	107759102	108392670	GACAT1	0.1015	0.1015	0.1015	0.06199	0.06199	0.06199		124513	rs1155886	A	0.04911	0.03326	0.1015	0.06199		124513	rs1155886	A	0.02388	0.01829	0.1015	0.06199		124513	rs1155886	A	0.02763	0.0297	0.1015	0.06199		124513	rs1155886	A	0.02055	0.02096	0.1015	0.06199		124513	rs1155886	A	0.02913	0.01792	0.1015
124559	3	178022390	179500828	KCNMB2,ENSG00000223930	0.0227	0.0303	0.02424	0.06201	0.1627	0.135242		124559	rs6791314	A	0.3973	0.3675	0.0227	0.1505		124559	rs6791314	A	0.4228	0.3841	0.0227	0.1505		124559	rs2863124	T	0.3948	0.3806	0.0228	0.1627		124559	rs6791314	A	0.3562	0.3464	0.0227	0.1505		124559	rs1441588	T	0.3935	0.3629	0.0303
124978	15	58981642	61195780	RORA	-0.0231	-0.0217	-0.02226	0.1542	0.1757	0.1671		124978	rs12909379	G	0.3804	0.3975	-0.0231	0.1542		124978	rs12909379	G	0.3272	0.3872	-0.0231	0.1542		124978	rs2414686	A	0.3431	0.3667	-0.0217	0.1757		124978	rs2414686	A	0.3767	0.3503	-0.0217	0.1757		124978	rs2414686	A	0.3485	0.3694	-0.0217
125158	7	153817459	154186526	DPP6	-0.0292	-0.0292	-0.0292	0.06549	0.06549	0.06549		125158	rs10263063	C	0.4768	0.4839	-0.0292	0.06549		125158	rs10263063	C	0.4579	0.4695	-0.0292	0.06549		125158	rs10263063	C	0.4812	0.4921	-0.0292	0.06549		125158	rs10263063	C	0.4315	0.4491	-0.0292	0.06549		125158	rs10263063	C	0.4747	0.4875	-0.0292
125170	19	58426609	63116444	ZNF417,ENSG00000269476	0.0212	0.0256	0.0227	0.1481	0.2521	0.21324		125170	rs12981037	C	0.2848	0.2647	0.0212	0.2521		125170	rs1544930	T	0.3034	0.3049	0.0212	0.2471		125170	rs12608717	G	0.2991	0.2996	0.0243	0.1718		125170	rs1544930	T	0.3904	0.3373	0.0212	0.2471		125170	rs12609410	T	0.3182	0.2921	0.0256
126078	4	111164592	111398608		-0.0318	-0.0248	-0.03022	0.1067	0.1963	0.12914		126078	rs11735814	T	0.1911	0.1859	-0.0318	0.1067		126078	rs17041514	G	0.1587	0.2073	-0.0309	0.1293		126078	rs11725723	C	0.2264	0.2333	-0.0248	0.1963		126078	rs11735814	T	0.1528	0.1939	-0.0318	0.1067		126078	rs11735814	T	0.171	0.1911	-0.0318
126380	13	21484380	22603401		0.0185	0.0381	0.0231	0.06818	0.3682	0.289816		126380	rs9509965	C	0.1955	0.1774	0.0185	0.3682		126380	rs9550805	C	0.1699	0.1738	0.0381	0.06818		126380	rs9509965	C	0.1979	0.1711	0.0185	0.3682		126380	rs9509965	C	0.2192	0.1826	0.0185	0.3682		126380	rs9506771	A	0.1674	0.1834	0.0219
126569	4	114478653	114698102	CAMK2D	-0.0371	-0.0371	-0.0371	0.06315	0.06315	0.06315		126569	rs11728021	G	0.1768	0.1924	-0.0371	0.06315		126569	rs11728021	G	0.2107	0.1951	-0.0371	0.06315		126569	rs11728021	G	0.1812	0.1788	-0.0371	0.06315		126569	rs11728021	G	0.1986	0.1707	-0.0371	0.06315		126569	rs11728021	G	0.188	0.2117	-0.0371
126612	8	4471483	4494520	CSMD1	-0.0291	-0.0214	-0.02558	0.1022	0.2406	0.16244		126612	rs1478281	C	0.267	0.2688	-0.0215	0.2371		126612	rs2724974	C	0.2415	0.2835	-0.0214	0.2406		126612	rs1155851	A	0.2321	0.2664	-0.0291	0.1022		126612	rs1155851	A	0.2808	0.256	-0.0291	0.1022		126612	rs1154582	C	0.2561	0.2987	-0.0268
127071	4	88655984	88929611		-0.0264	-0.0202	-0.02324	0.1401	0.2428	0.18542		127071	rs2627714	G	0.2688	0.2943	-0.0232	0.1814		127071	rs2732171	A	0.2739	0.2317	-0.0202	0.2428		127071	rs2126650	T	0.2442	0.2897	-0.0264	0.1401		127071	rs2627714	G	0.2123	0.2904	-0.0232	0.1814		127071	rs2627714	G	0.2716	0.2987	-0.0232
127080	11	82740177	83062529	CCDC90B	0.022	0.0251	0.02396	0.1413	0.2126	0.16924		127080	rs493681	C	0.2705	0.2561	0.0238	0.1755		127080	rs493681	C	0.2598	0.2652	0.0238	0.1755		127080	rs4623925	A	0.2843	0.2424	0.0251	0.1413		127080	rs4623925	A	0.274	0.3174	0.0251	0.1413		127080	rs10792682	T	0.2684	0.2639	0.022
127224	18	74164175	76063187		-0.0249	-0.0249	-0.0249	0.1909	0.1909	0.1909		127224	rs1123132	T	0.2634	0.301	-0.0249	0.1909		127224	rs1123132	T	0.257	0.311	-0.0249	0.1909		127224	rs1123132	T	0.2959	0.2891	-0.0249	0.1909		127224	rs1123132	T	0.3425	0.2575	-0.0249	0.1909		127224	rs1123132	T	0.2818	0.2889	-0.0249
127606	7	16787880	16821355	TSPAN13	-0.0298	-0.0298	-0.0298	0.06374	0.06374	0.06374		127606	rs3807496	G	0.392	0.4096	-0.0298	0.06374		127606	rs3807496	G	0.4143	0.3811	-0.0298	0.06374		127606	rs3807496	G	0.3672	0.4048	-0.0298	0.06374		127606	rs3807496	G	0.411	0.3862	-0.0298	0.06374		127606	rs3807496	G	0.3934	0.3991	-0.0298
127723	12	116457681	117973915	KSR2	-0.0245	-0.0195	-0.02158	0.1269	0.2349	0.1837		127723	rs10850839	T	0.3491	0.3724	-0.0245	0.1269		127723	rs10850839	T	0.3399	0.372	-0.0245	0.1269		127723	rs1501635	C	0.3538	0.3939	-0.0195	0.2349		127723	rs11610896	G	0.4452	0.4102	-0.0197	0.2149		127723	rs11610896	G	0.3817	0.3927	-0.0197
127836	10	8047550	8087556	TAF3	-0.0433	-0.0433	-0.0433	0.06386	0.06386	0.06386		127836	rs768166	G	0.1214	0.1414	-0.0433	0.06386		127836	rs768166	G	0.1194	0.1402	-0.0433	0.06386		127836	rs768166	G	0.1114	0.1406	-0.0433	0.06386		127836	rs768166	G	0.1301	0.1198	-0.0433	0.06386		127836	rs768166	G	0.1264	0.1454	-0.0433
127997	10	109529198	109529803	LINC01435	0.0208	0.0236	0.02136	0.1493	0.204	0.19306		127997	rs10884534	G	0.3804	0.3564	0.0208	0.204		127997	rs10884534	G	0.3806	0.3811	0.0208	0.204		127997	rs2418976	A	0.3253	0.3527	0.0236	0.1493		127997	rs10884534	G	0.3904	0.4461	0.0208	0.204		127997	rs10884534	G	0.4132	0.3871	0.0208
128012	9	35319634	35425169	UNC13B	0.0294	0.0312	0.03032	0.3073	0.3261	0.31734		128012	rs4878613	A	0.08304	0.07428	0.0301	0.3162		128012	rs4878613	A	0.06461	0.06707	0.0301	0.3162		128012	rs1927960	T	0.07754	0.05893	0.0308	0.3209		128012	rs4878617	A	0.07639	0.06587	0.0294	0.3261		128012	rs10972429	T	0.06368	0.0713	0.0312
128915	13	92343189	93545188	GPC5	-0.0469	-0.0225	-0.03226	0.07067	0.4013	0.269048		128915	rs12431222	A	0.09018	0.1003	-0.0225	0.4013		128915	rs4522294	G	0.0927	0.1189	-0.0469	0.07067		128915	rs4522294	G	0.09537	0.08727	-0.0469	0.07067		128915	rs12431222	A	0.1164	0.1078	-0.0225	0.4013		128915	rs12431222	A	0.0836	0.1069	-0.0225
129004	6	56281321	56389280		-0.0302	-0.0302	-0.0302	0.09124	0.09124	0.09124		129004	rs4715624	C	0.2643	0.2539	-0.0302	0.09124		129004	rs4715624	C	0.2374	0.3018	-0.0302	0.09124		129004	rs4715624	C	0.2647	0.2715	-0.0302	0.09124		129004	rs4715624	C	0.2534	0.2741	-0.0302	0.09124		129004	rs4715624	C	0.2489	0.2766	-0.0302
129186	19	54131638	58823450		0.0334	0.0334	0.0334	0.06462	0.06462	0.06462		129186	rs4801994	G	0.25	0.2306	0.0334	0.06462		129186	rs4801994	G	0.2514	0.2423	0.0334	0.06462		129186	rs4801994	G	0.2312	0.2273	0.0334	0.06462		129186	rs4801994	G	0.2222	0.283	0.0334	0.06462		129186	rs4801994	G	0.2658	0.2221	0.0334
129213	3	115981443	117464133	LSAMP	0.0284	0.0284	0.0284	0.1115	0.1115	0.1115		129213	rs4831129	G	0.2723	0.2567	0.0284	0.1115		129213	rs4831129	G	0.3006	0.2256	0.0284	0.1115		129213	rs4831129	G	0.2852	0.263	0.0284	0.1115		129213	rs4831129	G	0.2778	0.2667	0.0284	0.1115		129213	rs4831129	G	0.2914	0.2948	0.0284
129458	5	78909324	78975097	TENT2	0.033	0.0465	0.03868	0.08215	0.2309	0.16758		129458	rs3829808	G	0.1016	0.08559	0.033	0.2309		129458	rs3829808	G	0.09859	0.1067	0.033	0.2309		129458	rs1948764	T	0.1034	0.08303	0.0344	0.2118		129458	rs7732613	G	0.08219	0.08383	0.0465	0.08215		129458	rs7732613	G	0.09273	0.0914	0.0465
129462	9	97917027	98888628	ERCC6L2,ENSG00000275465	0.0264	0.0296	0.02896	0.06479	0.1037	0.072572		129462	rs10733713	T	0.4491	0.4318	0.0296	0.06479		129462	rs10760787	T	0.4972	0.4512	0.0264	0.1037		129462	rs10733713	T	0.4706	0.4284	0.0296	0.06479		129462	rs10733713	T	0.3973	0.4251	0.0296	0.06479		129462	rs10733713	T	0.4352	0.415	0.0296
129561	1	44354325	44578559	ENSG00000230615	-0.0072	-0.0017	-0.0061	0.6574	0.9125	0.70842		129561	rs663818	T	0.483	0.4983	-0.0072	0.6574		129561	rs663818	T	0.486	0.4726	-0.0072	0.6574		129561	rs600450	A	0.484	0.4739	-0.0017	0.9125		129561	rs663818	T	0.4375	0.4849	-0.0072	0.6574		129561	rs663818	T	0.466	0.4855	-0.0072
129569	6	96326035	96427023		-0.0341	-0.0231	-0.02698	0.09716	0.2452	0.186612		129569	rs2785918	T	0.1735	0.1957	-0.0341	0.09716		129569	rs7765008	C	0.1728	0.1829	-0.0275	0.1915		129569	rs1537983	G	0.2005	0.2018	-0.0231	0.2452		129569	rs2785919	T	0.1781	0.1677	-0.0251	0.1996		129569	rs2785919	T	0.1924	0.2174	-0.0251
129614	7	132734044	133200522	EXOC4	0.0222	0.0304	0.0254	0.1096	0.2504	0.1926		129614	rs1149555	G	0.2205	0.1922	0.0222	0.2504		129614	rs2059376	A	0.2065	0.1555	0.0304	0.1096		129614	rs1364503	T	0.1934	0.1933	0.0248	0.2104		129614	rs6956293	C	0.1806	0.2275	0.0247	0.1893		129614	rs10954417	C	0.2118	0.1953	0.0249
129663	11	16175917	16225741	SOX6	0.0231	0.0268	0.02554	0.09055	0.1328	0.105188		129663	rs1455104	C	0.4821	0.4645	0.0268	0.09109		129663	rs6486278	A	0.4761	0.4939	0.0257	0.1067		129663	rs1356647	A	0.4991	0.4896	0.0254	0.1048		129663	rs7125634	T	0.4932	0.497	0.0267	0.09055		129663	rs11023860	T	0.4979	0.4615	0.0231
130199	14	48280344	49300194		-0.0448	-0.0403	-0.04386	0.06795	0.1066	0.088932		130199	rs2816697	C	0.08661	0.1136	-0.0447	0.06795		130199	rs6572520	T	0.0941	0.09451	-0.0448	0.1066		130199	rs2816697	C	0.09269	0.12	-0.0447	0.06795		130199	rs6572520	T	0.1096	0.1265	-0.0448	0.1066		130199	rs2790516	C	0.1115	0.1192	-0.0403
130311	9	136857934	137718113	COL5A1	0.0319	0.0319	0.0319	0.06526	0.06526	0.06526		130311	rs4842173	C	0.2982	0.2717	0.0319	0.06526		130311	rs4842173	C	0.3118	0.2835	0.0319	0.06526		130311	rs4842173	C	0.3075	0.2764	0.0319	0.06526		130311	rs4842173	C	0.2808	0.2922	0.0319	0.06526		130311	rs4842173	C	0.2977	0.3131	0.0319
130539	1	202723959	204457336	PIK3C2B	0.0271	0.0271	0.0271	0.1137	0.1137	0.1137		130539	rs7556371	G	0.3054	0.2886	0.0271	0.1137		130539	rs7556371	G	0.2795	0.2805	0.0271	0.1137		130539	rs7556371	G	0.3226	0.2603	0.0271	0.1137		130539	rs7556371	G	0.3493	0.3084	0.0271	0.1137		130539	rs7556371	G	0.2885	0.2865	0.0271
130628	9	86934630	87784527		0.0154	0.0283	0.02548	0.06803	0.338	0.1301		130628	rs10868257	T	0.4518	0.4108	0.0279	0.08149		130628	rs4877909	T	0.4396	0.4421	0.0154	0.338		130628	rs1078815	A	0.4304	0.4261	0.0283	0.06803		130628	rs10868257	T	0.4452	0.3939	0.0279	0.08149		130628	rs10868257	T	0.4543	0.4195	0.0279
130820	17	60092969	62662507		-0.0425	-0.0386	-0.04094	0.07545	0.1459	0.10363		130820	rs7223733	C	0.1661	0.1879	-0.0386	0.1459		130820	rs7223733	C	0.1882	0.1677	-0.0386	0.1459		130820	rs6504246	G	0.1907	0.1723	-0.0425	0.07545		130820	rs6504246	G	0.1786	0.1472	-0.0425	0.07545		130820	rs6504246	G	0.1704	0.1918	-0.0425
130882	3	145737357	147228251		-0.0304	-0.0251	-0.0271	0.07839	0.1317	0.112038		130882	rs1449452	G	0.2946	0.3126	-0.0264	0.12		130882	rs1449452	G	0.3539	0.2988	-0.0264	0.12		130882	rs11720981	T	0.2812	0.3238	-0.0304	0.07839		130882	rs993520	A	0.2877	0.2892	-0.0251	0.1317		130882	rs1449453	A	0.2955	0.2975	-0.0272
130926	12	107503078	108989618		-0.0294	-0.0243	-0.02532	0.06562	0.1392	0.124484		130926	rs10861950	T	0.3357	0.3731	-0.0243	0.1392		130926	rs2888970	G	0.3581	0.3415	-0.0294	0.06562		130926	rs10861950	T	0.3378	0.3758	-0.0243	0.1392		130926	rs10861950	T	0.4521	0.3705	-0.0243	0.1392		130926	rs10861950	T	0.3541	0.3524	-0.0243
131017	3	82280224	82415734	LINC02008	0.0131	0.0225	0.01516	0.1501	0.4021	0.34996		131017	rs13087528	C	0.4946	0.4578	0.0134	0.4021		131017	rs7625954	A	0.4705	0.3963	0.0225	0.1501		131017	rs1562732	A	0.492	0.4709	0.0131	0.3934		131017	rs13087528	C	0.4521	0.491	0.0134	0.4021		131017	rs13087528	C	0.4704	0.4847	0.0134
131128	9	71101386	71908061		-0.0108	-0.0083	-0.00926	0.7447	0.8007	0.7793		131128	rs7034960	A	0.04732	0.06818	-0.0083	0.8007		131128	rs7034960	A	0.06882	0.05488	-0.0083	0.8007		131128	rs10121733	C	0.06328	0.06909	-0.0108	0.7447		131128	rs7034960	A	0.09589	0.08084	-0.0083	0.8007		131128	rs7020639	G	0.06211	0.0763	-0.0106
131224	4	174516367	174752942	HAND2-AS1	-0.0277	-0.0136	-0.01872	0.117	0.4182	0.30348		131224	rs11724478	T	0.2509	0.2691	-0.0277	0.117		131224	rs11945239	G	0.2697	0.2805	-0.0251	0.1458		131224	rs10025532	G	0.2986	0.337	-0.0136	0.4182		131224	rs10025532	G	0.3151	0.3494	-0.0136	0.4182		131224	rs10025532	G	0.3084	0.3181	-0.0136
131281	2	79402882	79549374	CTNNA2	0.0342	0.0385	0.03692	0.07432	0.1269	0.091432		131281	rs10520237	A	0.1571	0.128	0.0367	0.09081		131281	rs2060787	T	0.132	0.1463	0.0342	0.1269		131281	rs10520237	A	0.1533	0.1376	0.0367	0.09081		131281	rs13412922	A	0.1712	0.1386	0.0385	0.07432		131281	rs13412922	A	0.1557	0.134	0.0385
131523	11	16333695	16379226	SOX6	0.0158	0.0314	0.02828	0.06667	0.3541	0.124156		131523	rs7127006	A	0.275	0.2855	0.0314	0.06667		131523	rs7127006	A	0.2893	0.3049	0.0314	0.06667		131523	rs7933830	T	0.3565	0.3079	0.0158	0.3541		131523	rs7127006	A	0.2708	0.2892	0.0314	0.06667		131523	rs7127006	A	0.2934	0.2567	0.0314
131529	19	40502919	45333634	ZNF546	-0.0757	-0.03	-0.06096	0.205	0.5094	0.28758		131529	rs234324	G	0.02946	0.04102	-0.0757	0.205		131529	rs234324	G	0.03792	0.03049	-0.0757	0.205		131529	rs17761603	C	0.02589	0.02612	-0.0477	0.3135		131529	rs234324	G	0.02055	0.04217	-0.0757	0.205		131529	rs1327185	A	0.02307	0.0337	-0.03
131781	5	120331891	120395450		0.0175	0.0222	0.02108	0.1566	0.2647	0.18104		131781	rs1422606	C	0.4634	0.4461	0.0219	0.1613		131781	rs1422606	C	0.4312	0.3963	0.0219	0.1613		131781	rs1422606	C	0.4118	0.4473	0.0219	0.1613		131781	rs2973162	C	0.4722	0.4669	0.0222	0.1566		131781	rs1862281	C	0.4282	0.3891	0.0175
132063	11	133299698	133794488	IGSF9B	0.028	0.0309	0.0297	0.06627	0.1096	0.086518		132063	rs11223621	T	0.4293	0.4184	0.028	0.1096		132063	rs11223621	T	0.427	0.372	0.028	0.1096		132063	rs2062368	C	0.4617	0.4164	0.0308	0.07356		132063	rs2062368	C	0.3767	0.4521	0.0308	0.07356		132063	rs2027788	G	0.445	0.3994	0.0309
132232	22	43965722	45587058		-0.0355	-0.0339	-0.03486	0.06871	0.08309	0.074462		132232	rs2138154	A	0.1804	0.1968	-0.0355	0.06871		132232	rs2138154	A	0.1521	0.1982	-0.0355	0.06871		132232	rs2138154	A	0.1925	0.1891	-0.0355	0.06871		132232	rs17548742	C	0.1781	0.1867	-0.0339	0.08309		132232	rs17548742	C	0.2033	0.1903	-0.0339
132415	7	15680459	15713934	MEOX2,ENSG00000237070	0.019	0.019	0.019	0.2304	0.2304	0.2304		132415	rs6461202	C	0.483	0.4761	0.019	0.2304		132415	rs6461202	C	0.4972	0.4543	0.019	0.2304		132415	rs6461202	C	0.4964	0.4588	0.019	0.2304		132415	rs6461202	C	0.4726	0.4665	0.019	0.2304		132415	rs6461202	C	0.4968	0.4632	0.019
132530	3	186891908	188374602	RPL39L	-0.034	-0.034	-0.034	0.0973	0.0973	0.0973		132530	rs9290845	C	0.2084	0.2378	-0.034	0.0973		132530	rs9290845	C	0.2289	0.2439	-0.034	0.0973		132530	rs9290845	C	0.1916	0.2242	-0.034	0.0973		132530	rs9290845	C	0.226	0.1976	-0.034	0.0973		132530	rs9290845	C	0.2121	0.2343	-0.034
133060	2	23030262	23176757		-0.0296	-0.0257	-0.02882	0.06683	0.1262	0.078704		133060	rs7572707	A	0.3723	0.3625	-0.0296	0.06683		133060	rs7572707	A	0.2823	0.3811	-0.0296	0.06683		133060	rs7572707	A	0.3494	0.3636	-0.0296	0.06683		133060	rs7572707	A	0.3288	0.3353	-0.0296	0.06683		133060	rs4430897	A	0.3271	0.3675	-0.0257
133162	9	7051245	7075305	KDM4C	-0.0268	-0.0189	-0.0219	0.08858	0.2557	0.190986		133162	rs1570508	T	0.3488	0.3647	-0.0189	0.2557		133162	rs7019042	G	0.389	0.439	-0.0268	0.08858		133162	rs1570508	T	0.3316	0.3673	-0.0189	0.2557		133162	rs1570508	T	0.3592	0.3313	-0.0189	0.2557		133162	rs10815509	G	0.4076	0.4156	-0.026
133331	2	46918731	47065699	LINC01119	0.0249	0.0289	0.0257	0.06699	0.1296	0.117078		133331	rs2121322	T	0.3692	0.3736	0.0249	0.1296		133331	rs2121322	T	0.4394	0.365	0.0249	0.1296		133331	rs1466021	G	0.4358	0.3976	0.0289	0.06699		133331	rs2121322	T	0.3699	0.3892	0.0249	0.1296		133331	rs2121322	T	0.3814	0.3825	0.0249
133506	6	96332506	96439227		-0.0304	-0.0169	-0.02414	0.06708	0.2977	0.168712		133506	rs1015924	T	0.3	0.3343	-0.0261	0.114		133506	rs2785910	G	0.3118	0.3262	-0.0304	0.06708		133506	rs2785910	G	0.3152	0.3085	-0.0304	0.06708		133506	rs2799644	A	0.274	0.3144	-0.0169	0.2977		133506	rs2799644	A	0.3337	0.3596	-0.0169
133594	16	83340011	84779248	USP10	0.023	0.03	0.02738	0.1129	0.2406	0.15824		133594	rs7185949	G	0.2304	0.2095	0.0293	0.128		133594	rs7187994	G	0.2233	0.2439	0.03	0.1129		133594	rs16974515	G	0.2415	0.2145	0.0272	0.1586		133594	rs7498516	T	0.1319	0.2275	0.023	0.2406		133594	rs12445172	G	0.2276	0.2191	0.0274
133696	16	50162135	51604634	HNRNPA1P48	-0.0519	-0.0515	-0.05182	0.2288	0.2561	0.23426		133696	rs16950026	T	0.02589	0.03437	-0.0519	0.2288		133696	rs16950026	T	0.0309	0.04878	-0.0519	0.2288		133696	rs16950026	T	0.03476	0.04794	-0.0519	0.2288		133696	rs16950026	T	0.0137	0.03593	-0.0519	0.2288		133696	rs16949983	T	0.03793	0.03501	-0.0515
134344	19	55524813	60216625	GP6-AS1	-0.0318	-0.0318	-0.0318	0.06755	0.06755	0.06755		134344	rs1654410	C	0.4669	0.4739	-0.0318	0.06755		134344	rs1654410	C	0.4537	0.4573	-0.0318	0.06755		134344	rs1654410	C	0.4982	0.4806	-0.0318	0.06755		134344	rs1654410	C	0.4306	0.4627	-0.0318	0.06755		134344	rs1654410	C	0.4602	0.4873	-0.0318
134501	5	6307991	6360991	LINC02145	-0.0295	-0.0278	-0.02882	0.08319	0.1001	0.089954		134501	rs10059734	C	0.2812	0.3182	-0.0295	0.08319		134501	rs2242132	C	0.3146	0.3049	-0.0278	0.1001		134501	rs2242132	C	0.3164	0.3594	-0.0278	0.1001		134501	rs10059734	C	0.3288	0.3413	-0.0295	0.08319		134501	rs10059734	C	0.3447	0.3578	-0.0295
134888	3	73971120	74053810		0.0335	0.0447	0.03798	0.06786	0.1457	0.114564		134888	rs1405402	A	0.1375	0.1253	0.0335	0.1457		134888	rs1405402	A	0.09691	0.125	0.0335	0.1457		134888	rs1405402	A	0.1337	0.1048	0.0335	0.1457		134888	rs1918101	T	0.1027	0.1257	0.0447	0.06786		134888	rs1918101	T	0.1321	0.1154	0.0447
134935	1	101541456	101772190		-0.0282	-0.0257	-0.0272	0.06789	0.0975	0.079734		134935	rs1033634	C	0.4714	0.4922	-0.0282	0.06789		134935	rs1033634	C	0.5	0.4299	-0.0282	0.06789		134935	rs1033634	C	0.4866	0.4861	-0.0282	0.06789		134935	rs6683369	T	0.4795	0.479	-0.0257	0.0975		134935	rs6683369	T	0.4963	0.4669	-0.0257
135315	4	77521826	77713645	SHROOM3	0.03	0.0373	0.03584	0.08238	0.172	0.100304		135315	rs12501546	A	0.1607	0.1585	0.0373	0.08238		135315	rs12501546	A	0.1601	0.1402	0.0373	0.08238		135315	rs12108253	C	0.1783	0.1467	0.03	0.172		135315	rs12501546	A	0.1644	0.1687	0.0373	0.08238		135315	rs12501546	A	0.1616	0.1367	0.0373
135508	1	216710563	218643940	LINC02869	0.0415	0.0428	0.04176	0.06823	0.0869	0.083166		135508	rs725033	T	0.1375	0.1236	0.0415	0.0869		135508	rs725033	T	0.1124	0.1128	0.0415	0.0869		135508	rs725033	T	0.139	0.1158	0.0415	0.0869		135508	rs725033	T	0.09589	0.1228	0.0415	0.0869		135508	rs2001552	C	0.1247	0.1196	0.0428
135668	1	202824693	204569376		0.0242	0.0308	0.02732	0.06832	0.1517	0.108748		135668	rs6682208	T	0.3348	0.3149	0.0308	0.06832		135668	rs6682208	T	0.3118	0.311	0.0308	0.06832		135668	rs4951407	T	0.3708	0.3079	0.0242	0.1517		135668	rs4951407	T	0.4041	0.3473	0.0242	0.1517		135668	rs11240764	T	0.3351	0.3244	0.0266
136105	14	20530000	21460160		-0.0313	-0.0161	-0.02332	0.06856	0.349	0.209004		136105	rs2771342	T	0.2955	0.3099	-0.0313	0.06856		136105	rs2771342	T	0.315	0.375	-0.0313	0.06856		136105	rs2741737	T	0.3688	0.3606	-0.0161	0.349		136105	rs2741737	T	0.338	0.3323	-0.0161	0.349		136105	rs2741729	A	0.2792	0.3169	-0.0218
136470	7	52678234	52733291		0.0237	0.0287	0.02586	0.07579	0.1547	0.121278		136470	rs11762211	C	0.3403	0.357	0.0287	0.07579		136470	rs7810220	C	0.3919	0.3171	0.0266	0.1106		136470	rs1442260	T	0.3717	0.3368	0.0237	0.1547		136470	rs1442260	T	0.3836	0.3234	0.0237	0.1547		136470	rs7810220	C	0.3281	0.3674	0.0266
136616	16	10156361	10248860	GRIN2A	-0.0312	-0.0269	-0.03034	0.06887	0.1045	0.075996		136616	rs3852745	T	0.2875	0.3038	-0.0312	0.06887		136616	rs3852745	T	0.3132	0.3049	-0.0312	0.06887		136616	rs3852745	T	0.3146	0.3055	-0.0312	0.06887		136616	rs3852745	T	0.2877	0.3204	-0.0312	0.06887		136616	rs11074613	A	0.306	0.3369	-0.0269
136948	16	55622622	57065121	NLRC5	0.0296	0.0296	0.0296	0.07834	0.07834	0.07834		136948	rs16965220	A	0.3426	0.3022	0.0296	0.07834		136948	rs16965220	A	0.2683	0.3323	0.0296	0.07834		136948	rs16965220	A	0.3743	0.3265	0.0296	0.07834		136948	rs16965220	A	0.274	0.3174	0.0296	0.07834		136948	rs16965220	A	0.3411	0.3122	0.0296
136994	1	84060461	84289764	LINC01725	0.0271	0.0279	0.02758	0.1144	0.1206	0.11688		136994	rs12083999	T	0.3116	0.2694	0.0279	0.1144		136994	rs12083999	T	0.2739	0.3049	0.0279	0.1144		136994	rs12083999	T	0.303	0.2791	0.0279	0.1144		136994	rs3850438	C	0.3493	0.3024	0.0271	0.1206		136994	rs3850438	C	0.3155	0.2679	0.0271
137103	6	165557756	165639708		0.0351	0.0726	0.0473	0.06914	0.288	0.200668		137103	rs580256	T	0.05446	0.05211	0.044	0.2016		137103	rs1441889	C	0.05478	0.02761	0.0726	0.06914		137103	rs1744502	A	0.05971	0.05097	0.0351	0.288		137103	rs580256	T	0.08219	0.04491	0.044	0.2016		137103	rs1744498	G	0.06309	0.04651	0.0408
137246	3	45652966	45710349	LIMD1	-0.0443	-0.0343	-0.03888	0.08672	0.1991	0.147184		137246	rs17078175	A	0.09286	0.1188	-0.0405	0.1255		137246	rs17078175	A	0.0941	0.08232	-0.0405	0.1255		137246	rs2235130	G	0.07932	0.09903	-0.0443	0.08672		137246	rs3796362	T	0.08904	0.08383	-0.0343	0.1991		137246	rs13079217	A	0.09674	0.1172	-0.0348
137257	17	12182317	12242902		-0.0397	-0.0356	-0.03888	0.1587	0.1806	0.16308		137257	rs2252	T	0.08661	0.09978	-0.0397	0.1587		137257	rs9913623	A	0.09691	0.1012	-0.0356	0.1806		137257	rs2252	T	0.09091	0.1115	-0.0397	0.1587		137257	rs2252	T	0.1096	0.05988	-0.0397	0.1587		137257	rs2252	T	0.09652	0.09392	-0.0397
137353	3	104439114	105921804		0.0328	0.0328	0.0328	0.1358	0.1358	0.1358		137353	rs2947786	T	0.161	0.1414	0.0328	0.1358		137353	rs2947786	T	0.1461	0.125	0.0328	0.1358		137353	rs2947786	T	0.1658	0.1376	0.0328	0.1358		137353	rs2947786	T	0.1918	0.1717	0.0328	0.1358		137353	rs2947786	T	0.1606	0.1664	0.0328
137393	13	95338205	96612685	UGGT2	-0.0273	-0.0157	-0.02192	0.0892	0.3443	0.190926		137393	rs11070154	G	0.3964	0.4335	-0.0263	0.09303		137393	rs9561969	C	0.4101	0.4055	-0.0273	0.0892		137393	rs12876018	G	0.4061	0.4176	-0.0183	0.2545		137393	rs9561932	T	0.3288	0.3922	-0.022	0.1736		137393	rs11841021	G	0.4461	0.4123	-0.0157
137692	5	139257047	139276863	NRG2	-0.0351	-0.0323	-0.03286	0.1157	0.1224	0.12106		137692	rs1422188	T	0.1464	0.1596	-0.0351	0.1157		137692	rs1422186	A	0.1503	0.1616	-0.0323	0.1224		137692	rs1422186	A	0.1375	0.1745	-0.0323	0.1224		137692	rs1422186	A	0.1507	0.1856	-0.0323	0.1224		137692	rs1422186	A	0.1647	0.172	-0.0323
137894	8	43198953	43447235	POTEA	-0.066	-0.0489	-0.05582	0.08278	0.1463	0.125076		137894	rs11782981	C	0.05179	0.05931	-0.0514	0.1353		137894	rs7463498	G	0.05508	0.04268	-0.066	0.08278		137894	rs10104107	G	0.04813	0.06727	-0.0489	0.1463		137894	rs1921712	C	0.06849	0.03614	-0.0564	0.1305		137894	rs1921712	C	0.05532	0.05009	-0.0564
138166	14	101814242	102715656	WDR20	-0.0493	-0.0222	-0.03062	0.06975	0.4464	0.32215		138166	rs1190579	G	0.09643	0.1037	-0.0222	0.4464		138166	rs1190579	G	0.06039	0.1159	-0.0222	0.4464		138166	rs7142677	A	0.09269	0.08424	-0.0493	0.06975		138166	rs7148939	G	0.06849	0.0512	-0.0358	0.2286		138166	rs12887554	C	0.07684	0.1038	-0.0236
138335	1	18273567	18408767		0.0245	0.026	0.0248	0.1103	0.1363	0.1311		138335	rs9660584	T	0.3777	0.3487	0.0245	0.1363		138335	rs9660584	T	0.3357	0.3773	0.0245	0.1363		138335	rs10907300	A	0.3438	0.3485	0.026	0.1103		138335	rs9660584	T	0.3836	0.3443	0.0245	0.1363		138335	rs9660584	T	0.3683	0.3423	0.0245
138569	5	29584827	29620584		-0.0237	-0.0237	-0.0237	0.1256	0.1256	0.1256		138569	rs4634364	A	0.4134	0.4357	-0.0237	0.1256		138569	rs4634364	A	0.4213	0.4604	-0.0237	0.1256		138569	rs4634364	A	0.4144	0.4473	-0.0237	0.1256		138569	rs4634364	A	0.4247	0.4401	-0.0237	0.1256		138569	rs4634364	A	0.44	0.4301	-0.0237
138575	11	19522819	19566243	NAV2	-0.0379	-0.0213	-0.02918	0.06999	0.2882	0.184258		138575	rs12803842	C	0.183	0.2073	-0.0293	0.1743		138575	rs7950505	G	0.184	0.1463	-0.0213	0.2882		138575	rs7950505	G	0.1809	0.1812	-0.0213	0.2882		138575	rs7117077	C	0.1644	0.1747	-0.0361	0.1006		138575	rs10833130	C	0.1851	0.2108	-0.0379
139136	1	12426721	12467620	VPS13D	-0.0343	-0.0303	-0.03308	0.4404	0.5009	0.45764		139136	rs11801678	T	0.03839	0.02494	-0.0342	0.4471		139136	rs11801678	T	0.02949	0.04878	-0.0342	0.4471		139136	rs12068684	G	0.02406	0.04496	-0.0324	0.4404		139136	rs2295338	T	0.03472	0.04545	-0.0343	0.4527		139136	rs10864553	T	0.02892	0.03846	-0.0303
139428	1	9391701	9466803		0.0302	0.0311	0.03038	0.07046	0.1156	0.106572		139428	rs12044809	G	0.4464	0.4235	0.0302	0.1156		139428	rs12044809	G	0.3876	0.4055	0.0302	0.1156		139428	rs12022654	A	0.4123	0.4158	0.0311	0.07046		139428	rs12044809	G	0.4178	0.4608	0.0302	0.1156		139428	rs12044809	G	0.4457	0.4149	0.0302
139501	21	26397975	27502468	APP	-0.0271	-0.0207	-0.02266	0.1003	0.2157	0.17962		139501	rs2830054	G	0.3411	0.3651	-0.0207	0.2157		139501	rs2830076	T	0.3427	0.3598	-0.0224	0.1832		139501	rs2830054	G	0.352	0.3404	-0.0207	0.2157		139501	rs2830076	T	0.2534	0.3593	-0.0224	0.1832		139501	rs2234988	A	0.3475	0.3921	-0.0271
139819	1	77048129	77323384		0.0276	0.0307	0.02822	0.07069	0.0976	0.092218		139819	rs9660892	T	0.3486	0.3133	0.0276	0.0976		139819	rs9660892	T	0.3441	0.3129	0.0276	0.0976		139819	rs1502904	T	0.3725	0.3345	0.0307	0.07069		139819	rs9660892	T	0.3288	0.4042	0.0276	0.0976		139819	rs9660892	T	0.3379	0.339	0.0276
139873	2	11991904	12074453	MIR3681HG	0.0298	0.0298	0.0298	0.1985	0.1985	0.1985		139873	rs7590488	G	0.1377	0.1214	0.0298	0.1985		139873	rs7590488	G	0.1011	0.1159	0.0298	0.1985		139873	rs7590488	G	0.1471	0.11	0.0298	0.1985		139873	rs7590488	G	0.1712	0.0994	0.0298	0.1985		139873	rs7590488	G	0.1277	0.1168	0.0298
140591	7	6384800	6437801	RAC1	-0.0433	-0.0289	-0.03218	0.07114	0.2237	0.185508		140591	rs10499344	G	0.117	0.1286	-0.0433	0.07114		140591	rs7784465	C	0.1124	0.1402	-0.0289	0.2237		140591	rs7784465	C	0.1221	0.1497	-0.0289	0.2237		140591	rs7784465	C	0.1268	0.1452	-0.0289	0.2237		140591	rs6463554	C	0.1126	0.149	-0.0309
140660	4	183622901	183859895	TENM3,ENSG00000248816	0.0625	0.0625	0.0625	0.07582	0.07582	0.07582		140660	rs10434298	T	0.05268	0.04545	0.0625	0.07582		140660	rs10434298	T	0.04916	0.03963	0.0625	0.07582		140660	rs10434298	T	0.0615	0.05697	0.0625	0.07582		140660	rs10434298	T	0.02055	0.04491	0.0625	0.07582		140660	rs10434298	T	0.05731	0.04122	0.0625
140788	2	95371030	96007303	KCNIP3	0.0159	0.0313	0.02274	0.0831	0.3919	0.23714		140788	rs11897976	T	0.2393	0.2411	0.0159	0.3919		140788	rs3105104	G	0.2879	0.2195	0.0313	0.0831		140788	rs11897976	T	0.2897	0.2491	0.0159	0.3919		140788	rs2113417	G	0.2397	0.2108	0.0253	0.1594		140788	rs2113417	G	0.2513	0.246	0.0253
140952	9	7961791	7979694		-0.0359	-0.019	-0.0269	0.1005	0.4171	0.26432		140952	rs10976702	A	0.1286	0.1474	-0.0359	0.1005		140952	rs10976702	A	0.1601	0.1646	-0.0359	0.1005		140952	rs10815734	T	0.1203	0.1448	-0.019	0.4171		140952	rs10815734	T	0.1164	0.1078	-0.019	0.4171		140952	rs10976693	G	0.139	0.1351	-0.0247
141077	3	187944924	189434944	LPP	0.0185	0.0246	0.02162	0.1695	0.2706	0.21184		141077	rs1975991	A	0.3179	0.3099	0.0246	0.1695		141077	rs1975991	A	0.3118	0.3201	0.0246	0.1695		141077	rs4381925	T	0.3821	0.3448	0.0185	0.2706		141077	rs4381925	T	0.3425	0.3922	0.0185	0.2706		141077	rs1479931	G	0.3741	0.3433	0.0219
141081	6	25245680	25355183	CMAHP	0.0162	0.0293	0.02488	0.08257	0.3126	0.154882		141081	rs10456319	A	0.3518	0.3315	0.0293	0.08257		141081	rs769108	C	0.3862	0.378	0.0162	0.3126		141081	rs7774664	A	0.3743	0.3394	0.0203	0.2141		141081	rs10456319	A	0.3836	0.3683	0.0293	0.08257		141081	rs10456319	A	0.3281	0.3274	0.0293
141180	2	60826290	60972786		0.0283	0.0295	0.02926	0.07147	0.08602	0.07438		141180	rs1866207	A	0.3312	0.3287	0.0295	0.07147		141180	rs1866207	A	0.3244	0.2652	0.0295	0.07147		141180	rs1866207	A	0.3298	0.3012	0.0295	0.07147		141180	rs1866207	A	0.3014	0.2964	0.0295	0.07147		141180	rs10210517	C	0.2989	0.3014	0.0283
141186	6	3690722	3745723	PXDC1	0.0158	0.0158	0.0158	0.577	0.577	0.577		141186	rs12526106	A	0.07946	0.08814	0.0158	0.577		141186	rs12526106	A	0.09691	0.05488	0.0158	0.577		141186	rs12526106	A	0.08556	0.09394	0.0158	0.577		141186	rs12526106	A	0.07534	0.09337	0.0158	0.577		141186	rs12526106	A	0.09747	0.07117	0.0158
141550	5	174140578	174210668	ENSG00000251670	-0.0311	-0.0215	-0.02348	0.09217	0.2338	0.200794		141550	rs13166147	A	0.2473	0.2312	-0.0216	0.226		141550	rs1605522	T	0.243	0.2652	-0.0311	0.09217		141550	rs13166147	A	0.2172	0.2512	-0.0216	0.226		141550	rs13166147	A	0.2397	0.2545	-0.0216	0.226		141550	rs11740192	A	0.227	0.2328	-0.0215
141575	11	8462719	8588823	STK33	-0.0242	-0.0176	-0.02102	0.1435	0.2763	0.19812		141575	rs1900273	A	0.4893	0.4695	-0.0176	0.2763		141575	rs9300091	A	0.4551	0.439	-0.0193	0.2219		141575	rs10840065	G	0.4652	0.5	-0.0211	0.182		141575	rs7127684	A	0.4521	0.4731	-0.0229	0.1669		141575	rs10769908	T	0.4947	0.4866	-0.0242
141834	13	70710948	71812947		0.0643	0.0696	0.06614	0.1776	0.2266	0.20796		141834	rs2325401	T	0.02589	0.01998	0.0643	0.2266		141834	rs2325401	T	0.01545	0.009202	0.0643	0.2266		141834	rs2325401	T	0.03495	0.02063	0.0643	0.2266		141834	rs9542625	G	0.02055	0.03293	0.0682	0.1824		141834	rs9317993	T	0.0274	0.02334	0.0696
141963	15	100091023	102273500	TARS3	-0.0202	-0.0144	-0.01672	0.2851	0.4676	0.3946		141963	rs8035839	A	0.3018	0.323	-0.0202	0.2851		141963	rs8035839	A	0.2584	0.3201	-0.0202	0.2851		141963	rs8024180	A	0.295	0.2518	-0.0144	0.4676		141963	rs8024180	A	0.3219	0.2922	-0.0144	0.4676		141963	rs8024180	A	0.2447	0.2786	-0.0144
142027	1	40292110	40547287	CAP1	0.013	0.0198	0.01538	0.2461	0.4428	0.37472		142027	rs3131683	T	0.3384	0.318	0.0179	0.3066		142027	rs4660378	A	0.3254	0.3006	0.0132	0.4353		142027	rs3122413	A	0.3226	0.3532	0.013	0.4428		142027	rs3122413	A	0.274	0.3353	0.013	0.4428		142027	rs10789078	T	0.3387	0.2974	0.0198
142137	20	51989384	52555977	BCAS1	0.0341	0.0341	0.0341	0.072	0.072	0.072		142137	rs6123328	C	0.2415	0.2114	0.0341	0.072		142137	rs6123328	C	0.2331	0.2591	0.0341	0.072		142137	rs6123328	C	0.2451	0.2188	0.0341	0.072		142137	rs6123328	C	0.2397	0.2036	0.0341	0.072		142137	rs6123328	C	0.2455	0.2029	0.0341
142199	6	164562747	164642757		-0.0388	-0.032	-0.03336	0.2968	0.3251	0.31944		142199	rs10945966	C	0.05982	0.07373	-0.032	0.3251		142199	rs11755623	A	0.06742	0.04573	-0.0388	0.2968		142199	rs10945966	C	0.04635	0.06909	-0.032	0.3251		142199	rs10945966	C	0.08219	0.06886	-0.032	0.3251		142199	rs10945966	C	0.0764	0.06194	-0.032
143051	5	136954719	136990185	KLHL3	-0.0278	-0.0242	-0.02636	0.09886	0.1564	0.121876		143051	rs3813314	T	0.3045	0.3221	-0.0242	0.1564		143051	rs3813314	T	0.3553	0.3049	-0.0242	0.1564		143051	rs4260664	T	0.3348	0.3295	-0.0278	0.09886		143051	rs4260664	T	0.3425	0.3114	-0.0278	0.09886		143051	rs4260664	T	0.3098	0.3387	-0.0278
143322	15	85070327	87286024	AGBL1	-0.0318	-0.0305	-0.03076	0.1134	0.1183	0.11438		143322	rs4386109	T	0.2045	0.2345	-0.0305	0.1134		143322	rs4386109	T	0.2149	0.2287	-0.0305	0.1134		143322	rs4386109	T	0.2268	0.2236	-0.0305	0.1134		143322	rs4386109	T	0.1849	0.2335	-0.0305	0.1134		143322	rs1377099	A	0.1893	0.2111	-0.0318
143509	17	62287922	64857460	CACNG5	-0.0323	-0.0207	-0.02532	0.07276	0.2265	0.166454		143509	rs17711944	T	0.2607	0.2772	-0.0323	0.07276		143509	rs1990341	T	0.3118	0.2622	-0.0322	0.08001		143509	rs3848413	A	0.2469	0.277	-0.0207	0.2265		143509	rs3848413	A	0.2808	0.2605	-0.0207	0.2265		143509	rs3848413	A	0.2725	0.2761	-0.0207
143613	8	121609298	121687250	SNTB1	0.0263	0.0292	0.02862	0.09578	0.1483	0.106284		143613	rs7008488	G	0.2857	0.2567	0.0292	0.09578		143613	rs7008488	G	0.2746	0.2669	0.0292	0.09578		143613	rs10808513	G	0.2629	0.2624	0.0263	0.1483		143613	rs7008488	G	0.2603	0.2515	0.0292	0.09578		143613	rs7008488	G	0.2637	0.2379	0.0292
143899	16	12629948	12726263		0.0184	0.0225	0.02086	0.1488	0.2485	0.18868		143899	rs7194011	C	0.412	0.387	0.0184	0.2485		143899	rs7194011	C	0.3806	0.3567	0.0184	0.2485		143899	rs4353467	G	0.3904	0.3745	0.0225	0.1488		143899	rs4353467	G	0.3425	0.4006	0.0225	0.1488		143899	rs4353467	G	0.4167	0.368	0.0225
144049	5	55856375	55892132	C5orf67	0.0269	0.0293	0.02786	0.1377	0.1688	0.15636		144049	rs13173241	A	0.2245	0.2101	0.0293	0.1377		144049	rs13173241	A	0.2037	0.1646	0.0293	0.1377		144049	rs3843467	T	0.2068	0.2018	0.0269	0.1688		144049	rs3843467	T	0.1644	0.2036	0.0269	0.1688		144049	rs3843467	T	0.2332	0.195	0.0269
144148	7	48514579	48533508	ABCA13	0.0225	0.0312	0.02598	0.07313	0.1797	0.137032		144148	rs6958584	C	0.2948	0.3131	0.0312	0.07313		144148	rs6958584	C	0.2865	0.2866	0.0312	0.07313		144148	rs1569095	C	0.3131	0.3291	0.0225	0.1795		144148	rs1918578	T	0.3151	0.3193	0.0225	0.1797		144148	rs1918578	T	0.3046	0.2785	0.0225
144343	2	51667472	51847852	ENSG00000231918	-0.0284	-0.0172	-0.02162	0.07325	0.2714	0.18415		144343	rs10495999	G	0.3875	0.4058	-0.0219	0.1745		144343	rs6721228	A	0.3427	0.3445	-0.0284	0.07325		144343	rs11563041	A	0.3619	0.3794	-0.0213	0.1781		144343	rs4971754	A	0.4178	0.4061	-0.0172	0.2714		144343	rs10514806	G	0.373	0.4013	-0.0193
144421	14	76708113	77650690	TMEM63C,ENSG00000259164	-0.0441	-0.031	-0.03996	0.07329	0.1929	0.111914		144421	rs17812088	C	0.1125	0.1247	-0.0441	0.07329		144421	rs9989201	T	0.09207	0.1307	-0.0365	0.1468		144421	rs17812088	C	0.09537	0.1267	-0.0441	0.07329		144421	rs17812088	C	0.1164	0.1138	-0.0441	0.07329		144421	rs11628257	T	0.1213	0.1199	-0.031
144741	9	95845456	96866877	PTPDC1	-0.0235	-0.0104	-0.01652	0.1404	0.5031	0.32764		144741	rs10122334	A	0.483	0.4728	-0.0104	0.5031		144741	rs10429556	C	0.427	0.4878	-0.0235	0.1404		144741	rs10429556	C	0.4617	0.4654	-0.0235	0.1404		144741	rs4744316	G	0.4178	0.497	-0.0119	0.4539		144741	rs10739969	T	0.4615	0.4918	-0.0133
144888	20	18941114	18993114	ENSG00000274863	-0.0453	-0.0453	-0.0453	0.07471	0.07471	0.07471		144888	rs2876507	T	0.1188	0.1236	-0.0453	0.07471		144888	rs2876507	T	0.1067	0.1037	-0.0453	0.07471		144888	rs2876507	T	0.09982	0.1261	-0.0453	0.07471		144888	rs2876507	T	0.1027	0.1168	-0.0453	0.07471		144888	rs2876507	T	0.1015	0.1243	-0.0453
145852	15	92461698	94658725		0.0188	0.0313	0.0228	0.07413	0.2643	0.202206		145852	rs11855780	G	0.333	0.3228	0.0213	0.2242		145852	rs11855780	G	0.2971	0.3252	0.0213	0.2242		145852	rs7180322	T	0.317	0.2888	0.0313	0.07413		145852	rs11855780	G	0.3288	0.3503	0.0213	0.2242		145852	rs11630494	T	0.3317	0.3019	0.0188
146015	14	82975557	83920369		-0.0415	-0.0357	-0.03914	0.157	0.2164	0.19384		146015	rs10484162	C	0.08125	0.06049	-0.0415	0.1897		146015	rs229817	C	0.07725	0.06707	-0.0357	0.2164		146015	rs10484162	C	0.05793	0.08485	-0.0415	0.1897		146015	rs229817	C	0.0625	0.08182	-0.0357	0.2164		146015	rs10484161	G	0.08703	0.06822	-0.0413
146134	14	99401629	100360094	EML1	0.0159	0.0301	0.0206	0.0743	0.3518	0.2472		146134	rs11160553	C	0.3321	0.3165	0.0171	0.315		146134	rs6575751	T	0.3006	0.3445	0.0159	0.3518		146134	rs11160553	C	0.3369	0.303	0.0171	0.315		146134	rs11849597	A	0.3014	0.3054	0.0301	0.0743		146134	rs1005766	G	0.3407	0.3274	0.0228
146376	4	17551658	18025484	LCORL	-0.0299	-0.0246	-0.02798	0.09218	0.1934	0.121496		146376	rs724577	A	0.2554	0.2749	-0.0293	0.09245		146376	rs724577	A	0.2711	0.2378	-0.0293	0.09245		146376	rs2707450	C	0.2772	0.2567	-0.0268	0.137		146376	rs925098	G	0.3219	0.2485	-0.0299	0.09218		146376	rs2011603	G	0.2492	0.2724	-0.0246
146475	17	73120267	75608672	ENSG00000285535	-0.0379	-0.0379	-0.0379	0.08938	0.08938	0.08938		146475	rs1077758	T	0.1586	0.1548	-0.0379	0.08938		146475	rs1077758	T	0.2079	0.186	-0.0379	0.08938		146475	rs1077758	T	0.1604	0.1848	-0.0379	0.08938		146475	rs1077758	T	0.2123	0.1737	-0.0379	0.08938		146475	rs1077758	T	0.1621	0.1822	-0.0379
146523	6	34592731	34730654	ILRUN	-0.0301	-0.027	-0.02762	0.1051	0.1627	0.15118		146523	rs2744963	A	0.2143	0.2361	-0.027	0.1627		146523	rs2744963	A	0.2416	0.1951	-0.027	0.1627		146523	rs2252551	G	0.205	0.2176	-0.0301	0.1051		146523	rs2744963	A	0.2123	0.2139	-0.027	0.1627		146523	rs2744963	A	0.204	0.2308	-0.027
146656	5	80904142	80937671	SSBP2	-0.0331	-0.0306	-0.0311	0.08681	0.1136	0.108242		146656	rs11743304	C	0.1986	0.2129	-0.0306	0.1136		146656	rs11743304	C	0.184	0.227	-0.0306	0.1136		146656	rs7720445	G	0.2143	0.2002	-0.0331	0.08681		146656	rs11743304	C	0.1781	0.2305	-0.0306	0.1136		146656	rs11743304	C	0.192	0.2189	-0.0306
146770	22	33619350	35291275	LINC02885	0.0251	0.0267	0.02542	0.0857	0.1178	0.11138		146770	rs137215	T	0.4812	0.4534	0.0251	0.1178		146770	rs137217	C	0.4761	0.436	0.0267	0.0857		146770	rs137215	T	0.4973	0.4448	0.0251	0.1178		146770	rs137215	T	0.4384	0.4431	0.0251	0.1178		146770	rs137215	T	0.4557	0.4863	0.0251
146856	20	52081230	52668126	BCAS1	0.0298	0.0304	0.02992	0.1176	0.1355	0.12118		146856	rs6097745	T	0.233	0.2406	0.0298	0.1176		146856	rs6097745	T	0.2416	0.189	0.0298	0.1176		146856	rs1557853	T	0.1912	0.1726	0.0304	0.1355		146856	rs6097745	T	0.2466	0.2904	0.0298	0.1176		146856	rs6097745	T	0.24	0.2092	0.0298
147277	3	35329050	35337113		0.0209	0.0233	0.02248	0.1391	0.1851	0.15442		147277	rs11129651	T	0.4562	0.4185	0.0233	0.1391		147277	rs11927356	G	0.3792	0.3933	0.0209	0.1851		147277	rs6550342	C	0.4554	0.4206	0.0216	0.1697		147277	rs11129651	T	0.4521	0.4431	0.0233	0.1391		147277	rs11129651	T	0.4379	0.4425	0.0233
147434	22	43857825	45479161		-0.0352	-0.029	-0.03024	0.07507	0.1369	0.124534		147434	rs12628020	A	0.1991	0.2134	-0.029	0.1369		147434	rs8136226	T	0.2374	0.2317	-0.0352	0.07507		147434	rs12628020	A	0.2143	0.2163	-0.029	0.1369		147434	rs12628020	A	0.1644	0.1737	-0.029	0.1369		147434	rs12628020	A	0.2058	0.2567	-0.029
147767	5	8132770	8186694		-0.0618	-0.043	-0.04676	0.07528	0.1878	0.165296		147767	rs2658161	C	0.04562	0.06056	-0.043	0.1878		147767	rs2602522	G	0.08567	0.05793	-0.0618	0.07528		147767	rs2658161	C	0.05704	0.06182	-0.043	0.1878		147767	rs2658161	C	0.06849	0.05689	-0.043	0.1878		147767	rs2658161	C	0.04947	0.06822	-0.043
148118	6	145378208	145419901		-0.0809	-0.0809	-0.0809	0.08221	0.08221	0.08221		148118	rs13199258	T	0.02232	0.03104	-0.0809	0.08221		148118	rs13199258	T	0.02107	0.01524	-0.0809	0.08221		148118	rs13199258	T	0.02321	0.03519	-0.0809	0.08221		148118	rs13199258	T	0.0137	0.02096	-0.0809	0.08221		148118	rs13199258	T	0.02789	0.03226	-0.0809
148281	8	115034776	115103952		-0.0146	-0.0126	-0.01376	0.3479	0.4316	0.38746		148281	rs10955698	C	0.4114	0.4133	-0.0145	0.3631		148281	rs4445256	T	0.4621	0.4543	-0.0126	0.4316		148281	rs4445256	T	0.4706	0.4855	-0.0126	0.4316		148281	rs10955698	C	0.4254	0.3981	-0.0145	0.3631		148281	rs4506247	C	0.4537	0.4828	-0.0146
148496	6	109416586	109603778	CEP57L1	0.0287	0.0437	0.03936	0.07568	0.2423	0.118328		148496	rs1106853	T	0.1518	0.1269	0.037	0.1223		148496	rs11966104	G	0.08567	0.128	0.0287	0.2423		148496	rs3813499	T	0.131	0.1012	0.0437	0.07568		148496	rs3813499	T	0.1111	0.1317	0.0437	0.07568		148496	rs3813499	T	0.1031	0.1209	0.0437
148565	9	38386065	38397915	ALDH1B1	0.0217	0.0295	0.02794	0.07572	0.2113	0.102836		148565	rs2073478	G	0.3875	0.3897	0.0295	0.07572		148565	rs7859877	G	0.3904	0.3415	0.0217	0.2113		148565	rs2073478	G	0.4055	0.3732	0.0295	0.07572		148565	rs2073478	G	0.4167	0.4182	0.0295	0.07572		148565	rs2073478	G	0.4098	0.3696	0.0295
148567	12	27908789	28022388		-0.0368	-0.0261	-0.02962	0.07572	0.19	0.146804		148567	rs258417	G	0.1812	0.2144	-0.0261	0.19		148567	rs7304170	T	0.1728	0.1738	-0.0368	0.07572		148567	rs258415	C	0.1878	0.161	-0.0284	0.1561		148567	rs258415	C	0.2466	0.1557	-0.0284	0.1561		148567	rs258415	C	0.1572	0.1896	-0.0284
148884	3	14262707	14305341		-0.0463	-0.026	-0.03832	0.07946	0.2955	0.151684		148884	rs1010755	T	0.09196	0.1059	-0.0379	0.1381		148884	rs13072044	T	0.132	0.1098	-0.0463	0.07946		148884	rs10510427	A	0.1141	0.1042	-0.026	0.2955		148884	rs13072044	T	0.1096	0.1168	-0.0463	0.07946		148884	rs12486770	A	0.09072	0.1094	-0.0351
148963	8	122601353	122682610		0.0425	0.0428	0.04256	0.1037	0.1117	0.1101		148963	rs7826054	C	0.1045	0.117	0.0425	0.1117		148963	rs7826054	C	0.1152	0.1433	0.0425	0.1117		148963	rs6983108	T	0.1188	0.1158	0.0428	0.1037		148963	rs7826054	C	0.1164	0.1114	0.0425	0.1117		148963	rs7826054	C	0.1185	0.1004	0.0425
148980	13	98232883	99434882		-0.028	-0.0274	-0.02776	0.07594	0.08162	0.078212		148980	rs9513489	C	0.3982	0.4157	-0.0274	0.08162		148980	rs9513489	C	0.4284	0.4268	-0.0274	0.08162		148980	rs9517445	G	0.3824	0.429	-0.028	0.07594		148980	rs9517445	G	0.4521	0.4401	-0.028	0.07594		148980	rs9517445	G	0.3979	0.3793	-0.028
149218	8	87039254	87114876	ATP6V0D2	-0.0281	-0.0263	-0.02774	0.09595	0.1237	0.10477		149218	rs7001553	C	0.2759	0.2814	-0.0281	0.1014		149218	rs7001553	C	0.262	0.3188	-0.0281	0.1014		149218	rs1552237	A	0.2816	0.2873	-0.0281	0.09595		149218	rs7001553	C	0.3014	0.3204	-0.0281	0.1014		149218	rs1026927	C	0.2694	0.2935	-0.0263
149332	4	157535527	157754977		0.0442	0.0442	0.0442	0.07614	0.07614	0.07614		149332	rs6811244	T	0.1259	0.1147	0.0442	0.07614		149332	rs6811244	T	0.09691	0.09451	0.0442	0.07614		149332	rs6811244	T	0.123	0.1176	0.0442	0.07614		149332	rs6811244	T	0.1438	0.09639	0.0442	0.07614		149332	rs6811244	T	0.1153	0.09229	0.0442
150014	5	84510240	84538384		0.0187	0.0279	0.0214	0.07653	0.2274	0.175506		150014	rs13170861	G	0.475	0.4945	0.0189	0.2174		150014	rs13170861	G	0.4859	0.4601	0.0189	0.2174		150014	rs10039746	T	0.4688	0.4509	0.0279	0.07653		150014	rs7446072	G	0.3904	0.488	0.0226	0.1388		150014	rs10462442	G	0.4796	0.4438	0.0187
150876	7	135595850	135945310	ENSG00000232053	-0.0267	-0.0253	-0.02642	0.08293	0.1029	0.087834		150876	rs10464717	A	0.408	0.4363	-0.0267	0.08293		150876	rs10464717	A	0.4242	0.3872	-0.0267	0.08293		150876	rs10464717	A	0.4292	0.447	-0.0267	0.08293		150876	rs7789574	T	0.4726	0.4401	-0.0253	0.1029		150876	rs1019680	C	0.4318	0.4892	-0.0267
151516	8	96238408	96308289	C8orf37-AS1	-0.0282	-0.0256	-0.02644	0.07741	0.1084	0.097966		151516	rs879999	C	0.45	0.4806	-0.0256	0.1084		151516	rs879999	C	0.4846	0.497	-0.0256	0.1084		151516	rs879999	C	0.4572	0.4703	-0.0256	0.1084		151516	rs894151	C	0.5	0.4671	-0.0272	0.08722		151516	rs13279671	C	0.4731	0.4973	-0.0282
151800	8	106377021	106456120	ZFPM2	0.0084	0.0171	0.01336	0.2777	0.5991	0.41336		151800	rs2054577	C	0.4652	0.4346	0.0171	0.2777		151800	rs2929062	C	0.4902	0.4787	0.0084	0.5991		151800	rs2929062	C	0.4848	0.4503	0.0084	0.5991		151800	rs2054577	C	0.4658	0.4939	0.0171	0.2777		151800	rs1552108	C	0.4758	0.4767	0.0158
151808	3	109210303	110732651	LINC01205	0.0227	0.0271	0.02412	0.07757	0.1454	0.124974		151808	rs10933993	T	0.4384	0.4379	0.0233	0.1454		151808	rs11717790	T	0.4944	0.4543	0.0242	0.1185		151808	rs10933993	T	0.4563	0.417	0.0233	0.1454		151808	rs769544	A	0.4722	0.4699	0.0227	0.138		151808	rs769537	T	0.4805	0.4919	0.0271
151892	16	84627328	86069827	ENSG00000279604	0.0308	0.0308	0.0308	0.1455	0.1455	0.1455		151892	rs16940293	G	0.1601	0.1483	0.0308	0.1455		151892	rs16940293	G	0.1785	0.0981	0.0308	0.1455		151892	rs16940293	G	0.1497	0.157	0.0308	0.1455		151892	rs16940293	G	0.1301	0.1717	0.0308	0.1455		151892	rs16940293	G	0.1411	0.1628	0.0308
152145	4	139626820	139839764		0.023	0.0363	0.02566	0.07776	0.2776	0.237632		152145	rs9790693	T	0.1723	0.1746	0.023	0.2776		152145	rs9790693	T	0.1938	0.1463	0.023	0.2776		152145	rs1910961	C	0.172	0.1715	0.0363	0.07776		152145	rs9790693	T	0.2361	0.1287	0.023	0.2776		152145	rs9790693	T	0.1963	0.1867	0.023
152289	3	66637645	66720335		-0.0211	-0.0211	-0.0211	0.2313	0.2313	0.2313		152289	rs6802463	C	0.3211	0.3417	-0.0211	0.2313		152289	rs6802463	C	0.3497	0.3323	-0.0211	0.2313		152289	rs6802463	C	0.3164	0.3491	-0.0211	0.2313		152289	rs6802463	C	0.3151	0.3072	-0.0211	0.2313		152289	rs6802463	C	0.3373	0.3494	-0.0211
152854	6	163221497	163312690	PACRG	-0.0473	-0.0322	-0.03572	0.07815	0.2671	0.22215		152854	rs13202023	C	0.09196	0.08324	-0.0322	0.2671		152854	rs9347700	T	0.08989	0.05488	-0.0347	0.2313		152854	rs2292575	G	0.07398	0.09212	-0.0473	0.07815		152854	rs13202023	C	0.1027	0.1228	-0.0322	0.2671		152854	rs13202023	C	0.07624	0.1039	-0.0322
152871	15	86543443	88742439	NTRK3	0.0358	0.0358	0.0358	0.4439	0.4439	0.4439		152871	rs8033396	C	0.03304	0.02109	0.0358	0.4439		152871	rs8033396	C	0.01545	0.03049	0.0358	0.4439		152871	rs8033396	C	0.02674	0.02488	0.0358	0.4439		152871	rs8033396	C	0.0411	0.02395	0.0358	0.4439		152871	rs8033396	C	0.03169	0.0211	0.0358
152883	8	83542128	83704683	ENSG00000253503,ENSG00000254394	-0.0186	-0.0186	-0.0186	0.2317	0.2317	0.2317		152883	rs10111398	C	0.4366	0.4684	-0.0186	0.2317		152883	rs10111398	C	0.4213	0.497	-0.0186	0.2317		152883	rs10111398	C	0.4385	0.4558	-0.0186	0.2317		152883	rs10111398	C	0.4932	0.4729	-0.0186	0.2317		152883	rs10111398	C	0.4346	0.436	-0.0186
153011	9	991397	1001397		0.0278	0.0278	0.0278	0.1214	0.1214	0.1214		153011	rs7033404	A	0.2625	0.2397	0.0278	0.1214		153011	rs7033404	A	0.2767	0.2012	0.0278	0.1214		153011	rs7033404	A	0.2594	0.2624	0.0278	0.1214		153011	rs7033404	A	0.2671	0.2874	0.0278	0.1214		153011	rs7033404	A	0.2808	0.2585	0.0278
153620	12	57149374	58856952		-0.0244	-0.0163	-0.0222	0.1137	0.3033	0.16084		153620	rs3858572	G	0.4366	0.4656	-0.0244	0.1137		153620	rs3858572	G	0.4338	0.4299	-0.0244	0.1137		153620	rs2883575	A	0.4011	0.4461	-0.0229	0.1371		153620	rs3907505	T	0.4178	0.3916	-0.0163	0.3033		153620	rs10747804	T	0.4241	0.4256	-0.023
153870	6	147639534	147750873	STXBP5	-0.0228	-0.0154	-0.01986	0.1419	0.3325	0.21532		153870	rs12191720	T	0.4759	0.4989	-0.0228	0.1419		153870	rs9373522	C	0.4761	0.4421	-0.0155	0.3325		153870	rs7739314	A	0.449	0.4575	-0.0154	0.3184		153870	rs12191720	T	0.4178	0.4671	-0.0228	0.1419		153870	rs12191720	T	0.4741	0.4919	-0.0228
154316	5	20367267	20418414	CDH18	-0.0265	-0.0235	-0.0247	0.08854	0.1376	0.117976		154316	rs10941711	A	0.3911	0.4224	-0.0235	0.1376		154316	rs10941711	A	0.4565	0.4085	-0.0235	0.1376		154316	rs10941711	A	0.4171	0.4145	-0.0235	0.1376		154316	rs11748566	G	0.4589	0.4192	-0.0265	0.08854		154316	rs11748566	G	0.4453	0.4723	-0.0265
154386	21	27061287	28127680		-0.0209	-0.0192	-0.01954	0.1847	0.2164	0.21006		154386	rs2212815	T	0.425	0.4423	-0.0192	0.2164		154386	rs2212815	T	0.3722	0.4451	-0.0192	0.2164		154386	rs2830480	C	0.4144	0.4564	-0.0209	0.1847		154386	rs2212815	T	0.3904	0.403	-0.0192	0.2164		154386	rs2212815	T	0.4276	0.4394	-0.0192
154415	12	17820080	18014619		-0.0278	-0.0198	-0.02144	0.1467	0.2887	0.25282		154415	rs11043662	G	0.2411	0.2627	-0.0198	0.27		154415	rs11043672	A	0.2163	0.2317	-0.0199	0.2887		154415	rs11043662	G	0.2326	0.2555	-0.0198	0.27		154415	rs11043672	A	0.2123	0.2	-0.0199	0.2887		154415	rs10840909	G	0.2232	0.2724	-0.0278
154539	1	166341940	168077636	GPR161	-0.0251	-0.0205	-0.02176	0.1224	0.2205	0.1938		154539	rs10918826	T	0.3482	0.3398	-0.0205	0.2205		154539	rs11582396	T	0.3525	0.4085	-0.022	0.1877		154539	rs10918826	T	0.3307	0.3509	-0.0205	0.2205		154539	rs203782	A	0.2603	0.3343	-0.0251	0.1224		154539	rs10918827	T	0.3282	0.357	-0.0207
154568	1	207688399	209621776		-0.0277	-0.0226	-0.02644	0.09689	0.1922	0.11672		154568	rs2179655	C	0.3	0.3246	-0.0273	0.09817		154568	rs2179655	C	0.3076	0.375	-0.0273	0.09817		154568	rs2179655	C	0.3369	0.3319	-0.0273	0.09817		154568	rs6688014	A	0.2945	0.3084	-0.0277	0.09689		154568	rs6687831	A	0.3137	0.3479	-0.0226
154690	12	45868962	47582695	PCED1B	0.0315	0.0315	0.0315	0.08895	0.08895	0.08895		154690	rs10881068	C	0.2643	0.2806	0.0315	0.08895		154690	rs10881068	C	0.2865	0.2835	0.0315	0.08895		154690	rs10881068	C	0.2986	0.2642	0.0315	0.08895		154690	rs10881068	C	0.2671	0.2635	0.0315	0.08895		154690	rs10881068	C	0.2741	0.2455	0.0315
154734	17	72010995	74499400		-0.0368	-0.0368	-0.0368	0.08308	0.08308	0.08308		154734	rs12948783	A	0.1688	0.1846	-0.0368	0.08308		154734	rs12948783	A	0.1606	0.1584	-0.0368	0.08308		154734	rs12948783	A	0.1381	0.1648	-0.0368	0.08308		154734	rs12948783	A	0.1575	0.1636	-0.0368	0.08308		154734	rs12948783	A	0.1529	0.1658	-0.0368
154957	6	167742211	167813853		0.0345	0.0448	0.04146	0.07935	0.1769	0.111222		154957	rs11759295	A	0.1054	0.09424	0.0445	0.09013		154957	rs78988207	T	0.1113	0.09509	0.0448	0.07935		154957	rs7767627	T	0.1257	0.1048	0.0345	0.1769		154957	rs11759295	A	0.08219	0.1108	0.0445	0.09013		154957	rs11753236	T	0.1029	0.1002	0.039
155218	3	177133282	178615976		-0.0301	-0.0243	-0.02894	0.07951	0.1733	0.098268		155218	rs869122	T	0.2911	0.3137	-0.0301	0.07951		155218	rs869122	T	0.3258	0.3384	-0.0301	0.07951		155218	rs869122	T	0.2843	0.3091	-0.0301	0.07951		155218	rs869122	T	0.274	0.2754	-0.0301	0.07951		155218	rs7636999	G	0.2637	0.2921	-0.0243
155665	13	58532448	59634447		0.0275	0.0275	0.0275	0.08742	0.08742	0.08742		155665	rs4886114	A	0.3839	0.3563	0.0275	0.08742		155665	rs4886114	A	0.3722	0.3598	0.0275	0.08742		155665	rs4886114	A	0.3619	0.3491	0.0275	0.08742		155665	rs4886114	A	0.3562	0.3593	0.0275	0.08742		155665	rs4886114	A	0.3728	0.3444	0.0275
155684	10	11521115	11571368	USP6NL	0.0227	0.0244	0.02338	0.2249	0.2451	0.23702		155684	rs10905968	C	0.1711	0.1922	0.0244	0.2249		155684	rs10905968	C	0.2135	0.1433	0.0244	0.2249		155684	rs11257119	A	0.1996	0.1739	0.0227	0.2451		155684	rs11257119	A	0.1233	0.2066	0.0227	0.2451		155684	rs11257119	A	0.2079	0.2039	0.0227
155971	8	101796638	101872805		0.0243	0.0317	0.03022	0.07996	0.1539	0.094748		155971	rs1982970	C	0.267	0.2749	0.0317	0.07996		155971	rs1982970	C	0.2921	0.2378	0.0317	0.07996		155971	rs3105429	G	0.2727	0.2764	0.0243	0.1539		155971	rs1982970	C	0.2808	0.2964	0.0317	0.07996		155971	rs1982970	C	0.2848	0.2537	0.0317
156853	9	137339138	138199317		-0.0292	-0.0292	-0.0292	0.08048	0.08048	0.08048		156853	rs4842247	A	0.3411	0.3272	-0.0292	0.08048		156853	rs4842247	A	0.3315	0.2988	-0.0292	0.08048		156853	rs4842247	A	0.317	0.3479	-0.0292	0.08048		156853	rs4842247	A	0.3451	0.3598	-0.0292	0.08048		156853	rs4842247	A	0.3217	0.3657	-0.0292
156933	13	57698033	58814163	LINC00374	-0.0347	-0.0264	-0.02894	0.1068	0.1837	0.156		156933	rs11148428	C	0.184	0.1707	-0.0264	0.1837		156933	rs11148428	C	0.1854	0.2378	-0.0264	0.1837		156933	rs4608230	C	0.1827	0.1772	-0.0347	0.1068		156933	rs4886072	T	0.1986	0.1777	-0.0277	0.1647		156933	rs12428632	T	0.186	0.1667	-0.0295
157189	8	118001867	118081446	SLC30A8	0.0096	0.0281	0.02052	0.08068	0.5375	0.223156		157189	rs3019885	G	0.4616	0.4374	0.0096	0.5375		157189	rs4269571	T	0.4522	0.4604	0.0217	0.1664		157189	rs2938864	A	0.4528	0.4218	0.0215	0.1648		157189	rs4269571	T	0.4521	0.4307	0.0217	0.1664		157189	rs1995581	G	0.4763	0.4275	0.0281
157597	8	23451993	23533140		0.0471	0.0546	0.05196	0.1138	0.1575	0.12824		157597	rs10098347	T	0.0625	0.04878	0.0527	0.1233		157597	rs10098347	T	0.05197	0.04268	0.0527	0.1233		157597	rs10098347	T	0.06518	0.04313	0.0527	0.1233		157597	rs992531	A	0.0411	0.07485	0.0471	0.1575		157597	rs11992418	A	0.06151	0.05835	0.0546
157991	1	14118324	14245737	KAZN	-0.0285	-0.028	-0.0283	0.08117	0.09105	0.085122		157991	rs10803436	A	0.3161	0.3415	-0.0285	0.08117		157991	rs10803436	A	0.361	0.3689	-0.0285	0.08117		157991	rs10803436	A	0.3217	0.3721	-0.0285	0.08117		157991	rs10927953	A	0.3425	0.3455	-0.028	0.09105		157991	rs10927953	A	0.3561	0.3494	-0.028
158592	6	118692498	118880302	CEP85L	-0.022	-0.0179	-0.01992	0.1525	0.2468	0.19724		158592	rs12194555	C	0.4795	0.4983	-0.022	0.1525		158592	rs7764272	A	0.434	0.439	-0.0179	0.2468		158592	rs11153748	A	0.4598	0.4812	-0.0204	0.1835		158592	rs11153748	A	0.4863	0.497	-0.0204	0.1835		158592	rs10457330	A	0.4853	0.4785	-0.0189
158678	10	80172214	80508588		-0.0315	-0.0282	-0.03064	0.1057	0.1646	0.1177		158678	rs12356700	C	0.1894	0.2135	-0.0315	0.1057		158678	rs12356700	C	0.2051	0.1799	-0.0315	0.1057		158678	rs2894386	A	0.2022	0.2451	-0.0305	0.1068		158678	rs12356700	C	0.2466	0.2305	-0.0315	0.1057		158678	rs12246720	A	0.182	0.1897	-0.0282
158684	3	111087564	112572521	CD96	-0.0334	-0.0221	-0.02618	0.128	0.3108	0.23112		158684	rs4682264	C	0.1353	0.1691	-0.0334	0.128		158684	rs7633973	T	0.1517	0.1738	-0.0221	0.3108		158684	rs7618272	G	0.1357	0.1679	-0.0239	0.2561		158684	rs7633973	T	0.1575	0.1467	-0.0221	0.3108		158684	rs1391354	G	0.1642	0.1887	-0.0294
158984	6	14642101	14750080		-0.0296	-0.0263	-0.02696	0.08175	0.1173	0.11019		158984	rs857424	A	0.2875	0.3027	-0.0263	0.1173		158984	rs857424	A	0.2756	0.2853	-0.0263	0.1173		158984	rs857424	A	0.2549	0.2949	-0.0263	0.1173		158984	rs857424	A	0.2877	0.2814	-0.0263	0.1173		158984	rs857423	C	0.2876	0.2742	-0.0296
159417	4	13496881	13892169	LINC01182	-0.0293	-0.027	-0.02792	0.08201	0.1148	0.101684		159417	rs1397623	T	0.2884	0.3185	-0.027	0.1148		159417	rs1397623	T	0.2837	0.3598	-0.027	0.1148		159417	rs1397623	T	0.287	0.3073	-0.027	0.1148		159417	rs2058582	A	0.3493	0.2934	-0.0293	0.08201		159417	rs2058582	A	0.2982	0.3201	-0.0293
159757	8	106778064	106847240	ZFPM2,ZFPM2-AS1	-0.0358	-0.0302	-0.03242	0.0884	0.1628	0.133352		159757	rs10105425	A	0.1571	0.1785	-0.0358	0.08996		159757	rs6469014	T	0.191	0.1951	-0.0302	0.1628		159757	rs6469014	T	0.1774	0.1582	-0.0302	0.1628		159757	rs6469014	T	0.2397	0.1818	-0.0302	0.1628		159757	rs6469015	A	0.1572	0.1782	-0.0357
159900	16	12600539	12705135	ENSG00000259899	-0.0202	-0.0135	-0.01816	0.2316	0.449	0.2988		159900	rs17824128	G	0.2939	0.308	-0.0202	0.2316		159900	rs17824128	G	0.3202	0.2927	-0.0202	0.2316		159900	rs17824128	G	0.2848	0.3234	-0.0202	0.2316		159900	rs7188663	T	0.2222	0.3061	-0.0167	0.3502		159900	rs11075123	A	0.2553	0.2812	-0.0135
159941	16	65556871	66999370	CES3	-0.0315	-0.025	-0.0289	0.127	0.2509	0.17656		159941	rs13336470	G	0.158	0.1752	-0.0315	0.127		159941	rs13336470	G	0.1517	0.1433	-0.0315	0.127		159941	rs13336470	G	0.1515	0.1818	-0.0315	0.127		159941	rs8045523	A	0.1438	0.1416	-0.025	0.2509		159941	rs8045523	A	0.1517	0.1541	-0.025
160149	8	39605204	39727788	ADAM2	-0.0201	-0.0189	-0.01914	0.2115	0.2363	0.23134		160149	rs673382	C	0.4373	0.4739	-0.0189	0.2363		160149	rs673382	C	0.434	0.4969	-0.0189	0.2363		160149	rs673382	C	0.4572	0.4576	-0.0189	0.2363		160149	rs673382	C	0.4521	0.4458	-0.0189	0.2363		160149	rs201972	T	0.4447	0.4544	-0.0201
160628	22	35860278	37530332	IL2RB	-0.0326	-0.0326	-0.0326	0.0827	0.0827	0.0827		160628	rs3218312	G	0.2098	0.2239	-0.0326	0.0827		160628	rs3218312	G	0.236	0.253	-0.0326	0.0827		160628	rs3218312	G	0.2103	0.2412	-0.0326	0.0827		160628	rs3218312	G	0.2192	0.2036	-0.0326	0.0827		160628	rs3218312	G	0.2114	0.2352	-0.0326
160686	1	232165385	234101396	SLC35F3	0.018	0.0268	0.02284	0.08782	0.2467	0.157424		160686	rs4920264	G	0.458	0.4623	0.0204	0.194		160686	rs9435588	A	0.4494	0.4024	0.0245	0.1293		160686	rs10797508	A	0.4581	0.4182	0.0268	0.08782		160686	rs9435588	A	0.4521	0.4581	0.0245	0.1293		160686	rs10737200	T	0.4958	0.4624	0.018
160701	11	134381855	134893106		-0.0574	-0.0514	-0.0538	0.09732	0.1357	0.120348		160701	rs10894945	C	0.05268	0.06153	-0.0514	0.1357		160701	rs11224169	T	0.05056	0.06098	-0.0574	0.09732		160701	rs11224169	T	0.06339	0.06121	-0.0574	0.09732		160701	rs10894945	C	0.07534	0.04545	-0.0514	0.1357		160701	rs10894945	C	0.04968	0.06194	-0.0514
161450	8	120718441	120847172		0.0385	0.044	0.03978	0.1457	0.2409	0.21778		161450	rs2164021	C	0.08125	0.05765	0.0388	0.2341		161450	rs6989251	C	0.09831	0.05793	0.0385	0.2409		161450	rs6469842	C	0.07219	0.07515	0.044	0.1457		161450	rs2164021	C	0.07534	0.04491	0.0388	0.2341		161450	rs2164021	C	0.06428	0.06272	0.0388
161495	8	117077882	117147060	LINC00536	0.0149	0.0243	0.01678	0.1407	0.3573	0.31398		161495	rs10109846	A	0.3759	0.3392	0.0149	0.3573		161495	rs9792120	T	0.375	0.2805	0.0243	0.1407		161495	rs10109846	A	0.3743	0.36	0.0149	0.3573		161495	rs10109846	A	0.3611	0.4006	0.0149	0.3573		161495	rs10109846	A	0.3641	0.3609	0.0149
161672	14	39957002	40889667		-0.0328	-0.0325	-0.03274	0.09181	0.09802	0.096778		161672	rs7142594	T	0.2018	0.2156	-0.0328	0.09802		161672	rs7142594	T	0.2121	0.247	-0.0328	0.09802		161672	rs7142594	T	0.2228	0.2248	-0.0328	0.09802		161672	rs7142594	T	0.2603	0.2169	-0.0328	0.09802		161672	rs2150531	T	0.1947	0.2193	-0.0325
162315	13	63415259	64486119	LINC00355	0.0233	0.0338	0.03006	0.08669	0.2428	0.138754		162315	rs275941	A	0.2098	0.1813	0.0338	0.08669		162315	rs694444	A	0.1994	0.186	0.0256	0.1909		162315	rs275930	T	0.2134	0.1826	0.0233	0.2428		162315	rs275941	A	0.1507	0.2043	0.0338	0.08669		162315	rs275941	A	0.1827	0.18	0.0338
162457	6	119710290	119812605		0.0156	0.028	0.01808	0.08375	0.3083	0.26339		162457	rs9320690	G	0.5	0.4806	0.0156	0.3083		162457	rs9320690	G	0.4621	0.4878	0.0156	0.3083		162457	rs9320690	G	0.4598	0.452	0.0156	0.3083		162457	rs9320690	G	0.411	0.488	0.0156	0.3083		162457	rs6569076	G	0.4519	0.4199	0.028
162643	10	4958841	4990993		0.0198	0.0216	0.02028	0.1948	0.1999	0.19762		162643	rs4528219	A	0.4554	0.4318	0.0201	0.1948		162643	rs4528219	A	0.4522	0.439	0.0201	0.1948		162643	rs12268038	A	0.4563	0.4558	0.0198	0.1999		162643	rs12268038	A	0.4452	0.4277	0.0198	0.1999		162643	rs11252834	T	0.4492	0.4133	0.0216
162873	20	39946985	40534765		-0.0315	-0.0264	-0.02986	0.2185	0.3163	0.24456		162873	rs12625309	T	0.09911	0.116	-0.0315	0.2185		162873	rs992782	T	0.09831	0.1494	-0.0264	0.3163		162873	rs12625309	T	0.1034	0.1152	-0.0315	0.2185		162873	rs12625309	T	0.08219	0.06886	-0.0315	0.2185		162873	rs10485684	T	0.124	0.09199	-0.0284
163100	5	108016782	108044681		0.0234	0.0276	0.02592	0.08411	0.1303	0.102586		163100	rs11952230	C	0.4893	0.46	0.0276	0.08411		163100	rs7737443	C	0.4874	0.4512	0.0234	0.1303		163100	rs7737443	C	0.4946	0.4994	0.0234	0.1303		163100	rs11952230	C	0.4795	0.497	0.0276	0.08411		163100	rs11952230	C	0.4952	0.491	0.0276
163113	1	90747382	91014198		-0.0382	-0.0315	-0.0341	0.09226	0.1413	0.119972		163113	rs12065389	C	0.1592	0.1578	-0.0382	0.09226		163113	rs1336874	C	0.1461	0.1677	-0.0315	0.1413		163113	rs693530	C	0.1337	0.1576	-0.0345	0.1147		163113	rs1336874	C	0.1301	0.1347	-0.0315	0.1413		163113	rs10493838	G	0.1416	0.1633	-0.0348
163172	3	119129528	120624333		0.0236	0.0244	0.02396	0.2279	0.2452	0.237		163172	rs10511391	T	0.1893	0.1696	0.0237	0.242		163172	rs16829853	A	0.2275	0.1768	0.0244	0.2279		163172	rs10511391	T	0.1943	0.1842	0.0237	0.242		163172	rs16829853	A	0.1781	0.2048	0.0244	0.2279		163172	rs12495749	C	0.2061	0.1923	0.0236
163583	6	130147261	130207384	TMEM244	0.0093	0.0342	0.02764	0.1147	0.6311	0.2342		163583	rs17396328	C	0.1522	0.1808	0.0342	0.1147		163583	rs9372948	T	0.1713	0.2104	0.0328	0.1333		163583	rs9321191	C	0.2317	0.1891	0.0093	0.6311		163583	rs9402178	A	0.1301	0.1557	0.0306	0.1613		163583	rs17474531	G	0.1816	0.1697	0.0313
163644	1	162652314	164385690		-0.061	-0.0243	-0.04466	0.08441	0.5019	0.248504		163644	rs10800018	C	0.05903	0.06707	-0.0385	0.2859		163644	rs2494388	T	0.04916	0.05488	-0.0243	0.5019		163644	rs10800018	C	0.041	0.05589	-0.0385	0.2859		163644	rs2634982	T	0.05479	0.02994	-0.061	0.08441		163644	rs2634982	T	0.05263	0.05993	-0.061
163645	1	178114500	179841753	TOR1AIP2	0.0229	0.0359	0.0312	0.08503	0.2599	0.146092		163645	rs3737813	C	0.1688	0.1547	0.0359	0.08503		163645	rs7411457	C	0.1812	0.2104	0.0229	0.2599		163645	rs2318388	T	0.1845	0.157	0.0275	0.1891		163645	rs3737813	C	0.1712	0.1515	0.0359	0.08503		163645	rs17279483	C	0.1783	0.1568	0.0338
163878	4	88347368	88566392	NUDT9	0.0208	0.0229	0.02248	0.1592	0.2025	0.16786		163878	rs10017282	T	0.3884	0.3897	0.0229	0.1592		163878	rs10017282	T	0.3789	0.3171	0.0229	0.1592		163878	rs10017282	T	0.4055	0.3739	0.0229	0.1592		163878	rs10017282	T	0.3881	0.4161	0.0229	0.1592		163878	rs9968511	T	0.3857	0.3925	0.0208
163883	7	158380759	158687998	DYNC2I1	-0.0295	-0.0273	-0.02862	0.1772	0.2121	0.19116		163883	rs1188960	T	0.1571	0.1874	-0.0273	0.2121		163883	rs1188974	A	0.1882	0.1933	-0.0295	0.1772		163883	rs1188960	T	0.18	0.1927	-0.0273	0.2121		163883	rs1188974	A	0.1849	0.2078	-0.0295	0.1772		163883	rs1188974	A	0.1714	0.1996	-0.0295
163955	5	22365310	22401067	CDH12	-0.0275	-0.0268	-0.02722	0.1192	0.1216	0.12064		163955	rs10473592	C	0.2393	0.286	-0.0268	0.1192		163955	rs10473592	C	0.2949	0.2683	-0.0268	0.1192		163955	rs1373371	C	0.2852	0.2921	-0.0275	0.1216		163955	rs1373371	C	0.3288	0.2922	-0.0275	0.1216		163955	rs1373371	C	0.2714	0.3208	-0.0275
163965	1	163553813	165295689	LMX1A	-0.0495	-0.043	-0.0466	0.1105	0.1629	0.13384		163965	rs2055681	G	0.06429	0.07816	-0.0475	0.1283		163965	rs7554002	A	0.07163	0.09146	-0.0455	0.1392		163965	rs1501490	G	0.05882	0.06667	-0.043	0.1629		163965	rs2055681	G	0.08219	0.05689	-0.0475	0.1283		163965	rs10733043	A	0.07113	0.04758	-0.0495
164242	5	177759075	177826469	COL23A1	0.0196	0.0196	0.0196	0.2428	0.2428	0.2428		164242	rs7722612	T	0.325	0.3352	0.0196	0.2428		164242	rs7722612	T	0.3511	0.3659	0.0196	0.2428		164242	rs7722612	T	0.3636	0.3176	0.0196	0.2428		164242	rs7722612	T	0.3904	0.3645	0.0196	0.2428		164242	rs7722612	T	0.3644	0.3315	0.0196
164336	2	15772051	15854600	LINC01804	-0.0308	-0.019	-0.02844	0.08481	0.2905	0.125948		164336	rs1421608	G	0.2161	0.2436	-0.0308	0.08481		164336	rs6733488	A	0.2626	0.2591	-0.019	0.2905		164336	rs1421608	G	0.2558	0.2612	-0.0308	0.08481		164336	rs1421608	G	0.2603	0.2259	-0.0308	0.08481		164336	rs1421608	G	0.2347	0.2576	-0.0308
164425	1	227996225	229929602		-0.0274	-0.0257	-0.02642	0.08487	0.1038	0.09638		164425	rs2780630	A	0.3929	0.4218	-0.0257	0.1038		164425	rs583645	T	0.4382	0.3811	-0.0274	0.09259		164425	rs2780630	A	0.4029	0.4339	-0.0257	0.1038		164425	rs479531	T	0.3493	0.4431	-0.0272	0.08487		164425	rs2780629	A	0.4177	0.4004	-0.0261
164431	6	140437223	140573526	ENSG00000288714	0.0259	0.0306	0.02912	0.08487	0.1457	0.109534		164431	rs201285	C	0.2652	0.2422	0.0297	0.1057		164431	rs12212163	G	0.25	0.2348	0.0259	0.1457		164431	rs10457702	A	0.2317	0.2358	0.0306	0.08487		164431	rs201285	C	0.2055	0.2455	0.0297	0.1057		164431	rs201285	C	0.2497	0.2159	0.0297
164574	8	103542538	103614612	ENSG00000253633	0.0236	0.0237	0.02364	0.1365	0.139	0.138		164574	rs4734636	A	0.3875	0.362	0.0237	0.1365		164574	rs4734636	A	0.361	0.3994	0.0237	0.1365		164574	rs10096810	G	0.3877	0.3424	0.0236	0.139		164574	rs10096810	G	0.2945	0.3825	0.0236	0.139		164574	rs10096810	G	0.368	0.4222	0.0236
164750	18	59662552	61516877		0.0197	0.0273	0.02242	0.1434	0.2943	0.22548		164750	rs1948914	C	0.2473	0.2323	0.0217	0.2299		164750	rs9963905	G	0.2346	0.2744	0.0273	0.1434		164750	rs2048028	C	0.2388	0.2184	0.0197	0.2943		164750	rs1948914	C	0.2671	0.2455	0.0217	0.2299		164750	rs1948914	C	0.2426	0.2153	0.0217
164762	15	20478608	22927167	CYFIP1	0.0198	0.0278	0.0246	0.08505	0.2032	0.13231		164762	rs11634023	A	0.466	0.4867	0.0198	0.2032		164762	rs7171787	G	0.4817	0.4726	0.0278	0.08505		164762	rs11634023	A	0.4893	0.4951	0.0198	0.2032		164762	rs7171787	G	0.4795	0.4879	0.0278	0.08505		164762	rs7171787	G	0.4973	0.4685	0.0278
164822	5	10318455	10371455		0.0321	0.0356	0.0349	0.09329	0.1447	0.103572		164822	rs606490	A	0.1795	0.1558	0.0356	0.09329		164822	rs606490	A	0.1784	0.128	0.0356	0.09329		164822	rs606490	A	0.172	0.1915	0.0356	0.09329		164822	rs606490	A	0.1479	0.1801	0.0356	0.09329		164822	rs555521	A	0.1635	0.153	0.0321
165001	7	110867477	111160356	IMMP2L	-0.0466	-0.0184	-0.03824	0.09937	0.5013	0.204454		165001	rs10215967	G	0.07232	0.08703	-0.0466	0.1139		165001	rs1981713	A	0.06601	0.08841	-0.0448	0.09937		165001	rs10215967	G	0.07361	0.08704	-0.0466	0.1139		165001	rs11975331	G	0.03425	0.05793	-0.0184	0.5013		165001	rs37674	C	0.08006	0.09855	-0.0348
165454	7	10792719	10836089		-0.0258	-0.0222	-0.02426	0.1449	0.2124	0.17678		165454	rs10230296	G	0.2964	0.3215	-0.0222	0.2124		165454	rs10230296	G	0.3155	0.2932	-0.0222	0.2124		165454	rs10486100	T	0.3182	0.297	-0.0253	0.1449		165454	rs12673360	T	0.2192	0.2754	-0.0258	0.1571		165454	rs12673360	T	0.2603	0.2862	-0.0258
165951	8	126774170	126858186	ENSG00000286122	-0.037	-0.0272	-0.03128	0.2567	0.3615	0.31176		165951	rs16900842	C	0.07143	0.08537	-0.037	0.2567		165951	rs7008332	C	0.07725	0.05183	-0.0272	0.3615		165951	rs1548060	A	0.05169	0.07091	-0.0299	0.3231		165951	rs1548060	A	0.05556	0.04242	-0.0299	0.3231		165951	rs10282903	G	0.06909	0.06619	-0.0324
166145	4	156633186	156852636	GUCY1A1	0.0286	0.0286	0.0286	0.1457	0.1457	0.1457		166145	rs10019835	T	0.233	0.2068	0.0286	0.1457		166145	rs10019835	T	0.2037	0.1524	0.0286	0.1457		166145	rs10019835	T	0.2027	0.196	0.0286	0.1457		166145	rs10019835	T	0.2192	0.1928	0.0286	0.1457		166145	rs10019835	T	0.2165	0.1903	0.0286
166301	15	36833504	39046212	LINC02694	0.0292	0.0292	0.0292	0.08591	0.08591	0.08591		166301	rs1465511	G	0.333	0.3198	0.0292	0.08591		166301	rs1465511	G	0.3469	0.2713	0.0292	0.08591		166301	rs1465511	G	0.3414	0.3117	0.0292	0.08591		166301	rs1465511	G	0.2123	0.3593	0.0292	0.08591		166301	rs1465511	G	0.3279	0.3256	0.0292
166562	12	105103375	106579245		0.0246	0.0246	0.0246	0.1216	0.1216	0.1216		166562	rs11112894	C	0.4795	0.4911	0.0246	0.1216		166562	rs11112894	C	0.4565	0.436	0.0246	0.1216		166562	rs11112894	C	0.4857	0.4939	0.0246	0.1216		166562	rs11112894	C	0.4589	0.4641	0.0246	0.1216		166562	rs11112894	C	0.4884	0.4785	0.0246
167132	14	40895026	41803291		0.0239	0.0301	0.02514	0.1054	0.2335	0.20788		167132	rs1006417	G	0.2209	0.2178	0.0239	0.2335		167132	rs1006417	G	0.2261	0.1707	0.0239	0.2335		167132	rs10483529	A	0.2299	0.2002	0.0301	0.1054		167132	rs1006417	G	0.2014	0.2455	0.0239	0.2335		167132	rs1006417	G	0.2084	0.2145	0.0239
167306	7	116627728	116840492	ST7	0.0136	0.0149	0.01464	0.3556	0.4032	0.36512		167306	rs193580	C	0.333	0.3337	0.0149	0.3556		167306	rs193580	C	0.3553	0.2927	0.0149	0.3556		167306	rs193580	C	0.3467	0.3067	0.0149	0.3556		167306	rs193580	C	0.3493	0.3473	0.0149	0.3556		167306	rs10808186	T	0.3539	0.3619	0.0136
167812	1	151591780	153325156		0.0398	0.043	0.04236	0.08677	0.1509	0.099596		167812	rs11205275	A	0.1143	0.1031	0.043	0.08677		167812	rs11205275	A	0.08989	0.128	0.043	0.08677		167812	rs11205275	A	0.1096	0.08424	0.043	0.08677		167812	rs11205275	A	0.06849	0.08133	0.043	0.08677		167812	rs10888558	C	0.1009	0.1129	0.0398
168353	1	205141528	207074905	IL24	0.0117	0.0239	0.01564	0.1447	0.4638	0.34892		168353	rs1150255	T	0.4902	0.4695	0.014	0.3816		168353	rs3762344	A	0.4101	0.4421	0.0169	0.2907		168353	rs1150258	C	0.4831	0.4758	0.0117	0.4638		168353	rs1150258	C	0.4795	0.497	0.0117	0.4638		168353	rs10779560	A	0.4684	0.4356	0.0239
169367	7	17704556	17739875		0.0188	0.0355	0.0311	0.1393	0.3922	0.20652		169367	rs10488472	A	0.1241	0.112	0.0355	0.1393		169367	rs2389833	A	0.1459	0.1037	0.0188	0.3922		169367	rs10488472	A	0.1116	0.1158	0.0355	0.1393		169367	rs10488472	A	0.125	0.1018	0.0355	0.1393		169367	rs11765836	C	0.1116	0.127	0.0302
169826	7	55866990	55899496	SEPTIN14	0.0307	0.0307	0.0307	0.08791	0.08791	0.08791		169826	rs6593284	T	0.3399	0.323	0.0307	0.08791		169826	rs6593284	T	0.338	0.3079	0.0307	0.08791		169826	rs6593284	T	0.3275	0.31	0.0307	0.08791		169826	rs6593284	T	0.3819	0.2896	0.0307	0.08791		169826	rs6593284	T	0.3154	0.2907	0.0307
169903	3	40224248	40326165	EIF1B-AS1	-0.0237	-0.0162	-0.02034	0.1402	0.2949	0.19928		169903	rs11129874	C	0.4535	0.4705	-0.0206	0.1871		169903	rs7639223	A	0.4213	0.4238	-0.0162	0.2949		169903	rs1344189	C	0.4403	0.4752	-0.0237	0.1402		169903	rs11129874	C	0.4315	0.4401	-0.0206	0.1871		169903	rs11129874	C	0.44	0.4615	-0.0206
170249	12	129680011	131115069	RIMBP2	0.0351	0.0381	0.0369	0.08814	0.1126	0.097924		170249	rs11061044	C	0.2054	0.1817	0.0351	0.1126		170249	rs4293159	T	0.1938	0.1687	0.0381	0.08814		170249	rs11061044	C	0.2032	0.1752	0.0351	0.1126		170249	rs4293159	T	0.2534	0.1826	0.0381	0.08814		170249	rs4293159	T	0.1911	0.1855	0.0381
170463	6	19013033	19121012		-0.0377	-0.0377	-0.0377	0.08826	0.08826	0.08826		170463	rs1407500	T	0.1366	0.1456	-0.0377	0.08826		170463	rs1407500	T	0.1194	0.1616	-0.0377	0.08826		170463	rs1407500	T	0.1444	0.137	-0.0377	0.08826		170463	rs1407500	T	0.1438	0.1536	-0.0377	0.08826		170463	rs1407500	T	0.1509	0.1752	-0.0377
170479	5	36759368	36795125		0.0273	0.0319	0.03098	0.08827	0.1332	0.097256		170479	rs2115198	T	0.2509	0.2323	0.0319	0.08827		170479	rs4869488	A	0.2098	0.2407	0.0273	0.1332		170479	rs2115198	T	0.2665	0.223	0.0319	0.08827		170479	rs2115198	T	0.274	0.2395	0.0319	0.08827		170479	rs2115198	T	0.2302	0.2263	0.0319
170498	17	14515369	14578993		0.0432	0.0433	0.04326	0.1218	0.1456	0.13132		170498	rs11649745	C	0.09156	0.0762	0.0432	0.1456		170498	rs11649745	C	0.0632	0.08537	0.0432	0.1456		170498	rs1019156	G	0.06595	0.08788	0.0433	0.1218		170498	rs1019156	G	0.1042	0.06587	0.0433	0.1218		170498	rs1019156	G	0.08197	0.06367	0.0433
170617	18	32419211	34165213	FHOD3	-0.0228	-0.0198	-0.02044	0.1857	0.2478	0.22842		170617	rs7244358	T	0.3	0.3027	-0.0199	0.2478		170617	rs9959037	C	0.2992	0.3598	-0.0228	0.1857		170617	rs7244358	T	0.2973	0.3206	-0.0199	0.2478		170617	rs8087852	G	0.2945	0.3293	-0.0198	0.2304		170617	rs8087852	G	0.3407	0.3086	-0.0198
171736	10	80662387	80992381	ZMIZ1	0.0244	0.026	0.02504	0.11	0.1321	0.12326		171736	rs1749845	T	0.3938	0.3997	0.026	0.11		171736	rs1749845	T	0.4354	0.375	0.026	0.11		171736	rs1574190	T	0.4073	0.3703	0.0244	0.1321		171736	rs1574190	T	0.3973	0.4192	0.0244	0.1321		171736	rs1574190	T	0.4089	0.3739	0.0244
172050	3	6516654	6565877	ENSG00000189229	-0.0186	-0.0032	-0.00834	0.7933	0.9586	0.89994		172050	rs9810593	T	0.01429	0.02439	-0.0186	0.7933		172050	rs10510338	G	0.02528	0.01524	-0.0032	0.9586		172050	rs10510338	G	0.009804	0.02187	-0.0032	0.9586		172050	rs10510338	G	0.02055	0.02395	-0.0032	0.9586		172050	rs9847060	A	0.01876	0.02514	-0.0135
172225	15	38475120	40683780	KNSTRN	-0.0207	-0.0202	-0.0203	0.1859	0.1971	0.19486		172225	rs2289332	G	0.4018	0.4368	-0.0202	0.1971		172225	rs2289332	G	0.4073	0.3811	-0.0202	0.1971		172225	rs11636361	G	0.3993	0.4448	-0.0207	0.1859		172225	rs2289332	G	0.4577	0.4281	-0.0202	0.1971		172225	rs2289332	G	0.4003	0.4105	-0.0202
172745	12	64287380	66001113	ENSG00000250748	-0.0732	-0.0412	-0.05436	0.08962	0.3491	0.239588		172745	rs11175829	A	0.03125	0.04051	-0.0732	0.08962		172745	rs11175829	A	0.04494	0.02439	-0.0732	0.08962		172745	rs12311233	G	0.03298	0.04606	-0.0412	0.3491		172745	rs12311233	G	0.0274	0.02695	-0.0412	0.3491		172745	rs10047609	A	0.04247	0.03214	-0.043
173240	4	134964598	135184048	ENSG00000251199	-0.0207	-0.0202	-0.0203	0.2083	0.2172	0.21008		173240	rs6839208	A	0.3286	0.3459	-0.0202	0.2083		173240	rs6839208	A	0.3357	0.4024	-0.0202	0.2083		173240	rs6839208	A	0.3444	0.354	-0.0202	0.2083		173240	rs6839208	A	0.2808	0.3042	-0.0202	0.2083		173240	rs1874217	A	0.3307	0.343	-0.0207
173732	2	118663324	118946854	THORLNC	-0.0299	-0.0292	-0.02958	0.0902	0.1063	0.100308		173732	rs4848497	T	0.25	0.2711	-0.0292	0.1063		173732	rs4849683	G	0.2669	0.3415	-0.0298	0.09937		173732	rs4848497	T	0.2714	0.2685	-0.0292	0.1063		173732	rs4849683	G	0.2123	0.2904	-0.0298	0.09937		173732	rs11123476	A	0.2629	0.2572	-0.0299
174086	3	163673434	165175998		-0.0242	-0.0214	-0.0224	0.156	0.196	0.18148		174086	rs1407537	A	0.3384	0.3137	-0.0217	0.1892		174086	rs9864398	G	0.3076	0.3049	-0.023	0.177		174086	rs1407537	A	0.2807	0.3261	-0.0217	0.1892		174086	rs3903745	T	0.3425	0.3114	-0.0242	0.156		174086	rs11712177	G	0.2913	0.3169	-0.0214
174105	9	118817665	119779810	ASTN2	-0.0287	-0.0145	-0.02242	0.09043	0.4161	0.231012		174105	rs10739481	C	0.2955	0.3171	-0.0287	0.09043		174105	rs2418446	C	0.264	0.3323	-0.0145	0.4161		174105	rs10739481	C	0.3071	0.2943	-0.0287	0.09043		174105	rs2418446	C	0.3562	0.2575	-0.0145	0.4161		174105	rs10739482	G	0.2626	0.2808	-0.0257
174399	5	112978531	113038827		-0.0245	-0.0184	-0.0219	0.16	0.266	0.19858		174399	rs2115207	T	0.3054	0.3359	-0.0225	0.1794		174399	rs2115207	T	0.361	0.3384	-0.0225	0.1794		174399	rs10039956	A	0.2745	0.3135	-0.0216	0.2081		174399	rs6891711	G	0.3151	0.2725	-0.0245	0.16		174399	rs2914174	G	0.3293	0.3208	-0.0184
174406	4	155576284	155795734	LRAT	-0.0251	-0.0251	-0.0251	0.1044	0.1044	0.1044		174406	rs1074801	A	0.4554	0.4728	-0.0251	0.1044		174406	rs1074801	A	0.4649	0.4909	-0.0251	0.1044		174406	rs1074801	A	0.4171	0.4667	-0.0251	0.1044		174406	rs1074801	A	0.4863	0.4731	-0.0251	0.1044		174406	rs1074801	A	0.4858	0.4669	-0.0251
174416	1	26613693	26743903	LIN28A	0.0262	0.0288	0.02776	0.09062	0.1149	0.100332		174416	rs6683792	T	0.3705	0.347	0.0262	0.1149		174416	rs6683792	T	0.3104	0.3506	0.0262	0.1149		174416	rs17163904	C	0.3351	0.3485	0.0288	0.09062		174416	rs17163904	C	0.363	0.3079	0.0288	0.09062		174416	rs17163904	C	0.3593	0.3273	0.0288
174484	14	75656117	76590473		0.0133	0.0296	0.01982	0.1514	0.5602	0.39668		174484	rs2543352	T	0.1554	0.1391	0.0133	0.5602		174484	rs2543352	T	0.139	0.1616	0.0133	0.5602		174484	rs2543352	T	0.1197	0.1447	0.0133	0.5602		174484	rs2543359	A	0.1507	0.1407	0.0296	0.1514		174484	rs2543359	A	0.1427	0.1512	0.0296
174683	8	72291940	72455596	EYA1	-0.0319	-0.0232	-0.02856	0.09076	0.2048	0.129644		174683	rs17786140	A	0.2438	0.2927	-0.0296	0.1193		174683	rs4413805	G	0.2149	0.2744	-0.0232	0.2048		174683	rs1156941	T	0.2531	0.2376	-0.0319	0.09076		174683	rs1156941	T	0.2397	0.2801	-0.0319	0.09076		174683	rs10111603	G	0.2878	0.3004	-0.0262
174905	7	78696298	78858362	MAGI2	-0.0428	-0.0428	-0.0428	0.1005	0.1005	0.1005		174905	rs848809	A	0.1143	0.1175	-0.0428	0.1005		174905	rs848809	A	0.09859	0.1402	-0.0428	0.1005		174905	rs848809	A	0.09002	0.1164	-0.0428	0.1005		174905	rs848809	A	0.1096	0.09581	-0.0428	0.1005		174905	rs848809	A	0.09925	0.09909	-0.0428
175026	10	52313227	52643179	A1CF	0.0198	0.021	0.02004	0.2272	0.2551	0.24952		175026	rs12244405	T	0.308	0.2644	0.0198	0.2551		175026	rs12244405	T	0.3132	0.2835	0.0198	0.2551		175026	rs6479769	T	0.3155	0.2679	0.021	0.2272		175026	rs12244405	T	0.2877	0.2725	0.0198	0.2551		175026	rs12244405	T	0.2896	0.2702	0.0198
176027	1	241072609	243027814		0.0023	0.023	0.01402	0.1396	0.8859	0.42458		176027	rs10926883	T	0.4125	0.3875	0.0088	0.5768		176027	rs10926898	T	0.4677	0.4939	0.018	0.2603		176027	rs1333691	C	0.4225	0.3914	0.0023	0.8859		176027	rs10926898	T	0.4863	0.4727	0.018	0.2603		176027	rs10926895	G	0.4995	0.4783	0.023
176062	5	140841985	140861801	PCDHGA2,PCDHGA1,PCDHGC3,PCDHGA12,PCDHGB6,PCDHGA5,PCDHGA7,PCDHGA6,PCDHGA8,PCDHGA10,PCDHGA11,PCDHGB2,PCDHGB4,PCDHGB7,PCDHGB1,PCDHGA3,PCDHGA9,PCDHGB3,PCDHGA4,PCDHGB5	0.0279	0.0279	0.0279	0.1148	0.1148	0.1148		176062	rs11748256	G	0.2648	0.2408	0.0279	0.1148		176062	rs11748256	G	0.2317	0.2348	0.0279	0.1148		176062	rs11748256	G	0.2291	0.2382	0.0279	0.1148		176062	rs11748256	G	0.2329	0.2305	0.0279	0.1148		176062	rs11748256	G	0.2713	0.2378	0.0279
176446	9	8950011	8971666	PTPRD	0.0392	0.0726	0.05924	0.09178	0.1439	0.112628		176446	rs13289308	C	0.08482	0.06937	0.0726	0.09178		176446	rs7037483	A	0.111	0.07622	0.0392	0.1439		176446	rs7037483	A	0.1061	0.08182	0.0392	0.1439		176446	rs13289308	C	0.07534	0.09337	0.0726	0.09178		176446	rs13289308	C	0.07413	0.07885	0.0726
176465	4	168075537	168330787	SPOCK3	0.0159	0.0249	0.01808	0.3605	0.5473	0.5006		176465	rs9312517	G	0.108	0.09267	0.0159	0.5473		176465	rs9312517	G	0.1039	0.04573	0.0159	0.5473		176465	rs12649263	T	0.09911	0.1018	0.0249	0.3605		176465	rs9312517	G	0.06849	0.09337	0.0159	0.5473		176465	rs10008797	A	0.08827	0.08797	0.0178
176631	3	193913552	195396246		-0.0342	-0.0342	-0.0342	0.09188	0.09188	0.09188		176631	rs4074131	G	0.175	0.1874	-0.0342	0.09188		176631	rs4074131	G	0.1784	0.1768	-0.0342	0.09188		176631	rs4074131	G	0.1872	0.1709	-0.0342	0.09188		176631	rs4074131	G	0.2123	0.1737	-0.0342	0.09188		176631	rs4074131	G	0.1619	0.1864	-0.0342
176699	14	28117222	29047471		0.0126	0.0276	0.0171	0.09191	0.4192	0.299862		176699	rs176295	T	0.4045	0.3907	0.0276	0.09191		176699	rs7147576	G	0.4579	0.3963	0.0126	0.4192		176699	rs10137138	A	0.4562	0.4212	0.0151	0.3294		176699	rs10137138	A	0.3767	0.4281	0.0151	0.3294		176699	rs10137138	A	0.4308	0.4233	0.0151
176928	5	145733194	145771821	ENSG00000250025	0.0306	0.0338	0.03274	0.1031	0.1417	0.11828		176928	rs1991800	A	0.1682	0.1475	0.0338	0.1031		176928	rs997011	G	0.1896	0.1524	0.0306	0.1404		176928	rs1991800	A	0.1524	0.1606	0.0338	0.1031		176928	rs1991800	A	0.1849	0.1898	0.0338	0.1031		176928	rs10455000	G	0.1691	0.1493	0.0317
177456	4	58401773	58707016		0.0268	0.0285	0.02748	0.0932	0.1154	0.10652		177456	rs1480319	A	0.3321	0.2794	0.0268	0.1154		177456	rs1480319	A	0.2851	0.3018	0.0268	0.1154		177456	rs1480319	A	0.2594	0.2828	0.0268	0.1154		177456	rs1480321	C	0.1986	0.2667	0.0285	0.0932		177456	rs1480321	C	0.2818	0.3128	0.0285
177738	8	130493148	130562330	CCDC26	0.0176	0.0176	0.0176	0.3078	0.3078	0.3078		177738	rs7000768	C	0.333	0.301	0.0176	0.3078		177738	rs7000768	C	0.3216	0.3262	0.0176	0.3078		177738	rs7000768	C	0.3012	0.2945	0.0176	0.3078		177738	rs7000768	C	0.3973	0.2622	0.0176	0.3078		177738	rs7000768	C	0.3374	0.3135	0.0176
177742	11	17397566	17441828	ABCC8	-0.0257	-0.0228	-0.02396	0.1428	0.194	0.17352		177742	rs2299641	C	0.292	0.265	-0.0257	0.1428		177742	rs4757517	A	0.309	0.2683	-0.0228	0.194		177742	rs2299641	C	0.2955	0.2891	-0.0257	0.1428		177742	rs4757517	A	0.3082	0.2545	-0.0228	0.194		177742	rs4757517	A	0.2869	0.3294	-0.0228
177993	18	7468995	7479918		0.0406	0.0407	0.04062	0.09264	0.09466	0.093044		177993	rs9951080	T	0.1571	0.1397	0.0406	0.09264		177993	rs9951080	T	0.1306	0.1128	0.0406	0.09264		177993	rs9951080	T	0.1444	0.1218	0.0406	0.09264		177993	rs9951080	T	0.1233	0.1257	0.0406	0.09264		177993	rs12605914	T	0.127	0.1315	0.0407
178211	1	96487584	96818456	LINC01787	-0.0263	-0.0074	-0.01802	0.1028	0.6677	0.30248		178211	rs325953	C	0.3625	0.332	-0.0188	0.2473		178211	rs325953	C	0.3455	0.4055	-0.0188	0.2473		178211	rs324860	C	0.3307	0.2897	-0.0074	0.6677		178211	rs325953	C	0.4247	0.3383	-0.0188	0.2473		178211	rs161982	C	0.3689	0.3587	-0.0263
178900	10	8780484	8820490		0.0237	0.0309	0.02768	0.09319	0.1831	0.131958		178900	rs1334557	T	0.2429	0.2694	0.0309	0.09319		178900	rs3897990	A	0.2789	0.2256	0.0244	0.1771		178900	rs7071899	T	0.2679	0.24	0.0297	0.1032		178900	rs7071899	T	0.1884	0.2421	0.0297	0.1032		178900	rs12220656	T	0.2516	0.2356	0.0237
179111	4	84654205	84873229		0.0269	0.0269	0.0269	0.09332	0.09332	0.09332		179111	rs1352436	A	0.3625	0.342	0.0269	0.09332		179111	rs1352436	A	0.3764	0.3841	0.0269	0.09332		179111	rs1352436	A	0.3663	0.3345	0.0269	0.09332		179111	rs1352436	A	0.3219	0.3683	0.0269	0.09332		179111	rs1352436	A	0.3453	0.3703	0.0269
179142	1	205210045	207143422	FCAMR	0.0208	0.0269	0.02478	0.09404	0.2009	0.120548		179142	rs1856746	G	0.4884	0.4717	0.0254	0.1026		179142	rs2275531	T	0.4129	0.4238	0.0208	0.2009		179142	rs1856746	G	0.484	0.4606	0.0254	0.1026		179142	rs1856746	G	0.4726	0.479	0.0254	0.1026		179142	rs10218826	T	0.4884	0.458	0.0269
179376	13	41783268	42863752		-0.0145	-0.0055	-0.00858	0.4985	0.8065	0.71138		179376	rs10492433	G	0.1268	0.1502	-0.0055	0.8065		179376	rs9525604	C	0.1475	0.1982	-0.0119	0.6389		179376	rs17703218	G	0.1488	0.1626	-0.0145	0.4985		179376	rs10492433	G	0.1389	0.1485	-0.0055	0.8065		179376	rs10492433	G	0.141	0.1369	-0.0055
179504	4	69923096	70066209		0.0124	0.0292	0.02414	0.1508	0.5559	0.26882		179504	rs4593203	G	0.1786	0.1626	0.0292	0.1508		179504	rs6833862	C	0.1662	0.1189	0.0124	0.5559		179504	rs4593203	G	0.1607	0.1735	0.0292	0.1508		179504	rs4593203	G	0.1849	0.1506	0.0292	0.1508		179504	rs12645107	A	0.1575	0.1544	0.0207
179606	11	34425512	34484973	CAT	0.0283	0.0308	0.02988	0.0936	0.131	0.10582		179606	rs10836244	T	0.2384	0.2073	0.0308	0.0936		179606	rs2284365	C	0.2598	0.2317	0.0287	0.131		179606	rs2284369	G	0.2308	0.2282	0.0283	0.1173		179606	rs10836244	T	0.3014	0.1826	0.0308	0.0936		179606	rs10836244	T	0.2329	0.2317	0.0308
179774	6	18976445	19084424		0.0256	0.0256	0.0256	0.1379	0.1379	0.1379		179774	rs834362	T	0.3259	0.3027	0.0256	0.1379		179774	rs834362	T	0.2725	0.3201	0.0256	0.1379		179774	rs834362	T	0.3066	0.3079	0.0256	0.1379		179774	rs834362	T	0.2534	0.2814	0.0256	0.1379		179774	rs834362	T	0.3024	0.2599	0.0256
179982	11	19894431	19937855	NAV2	0.0142	0.0142	0.0142	0.3554	0.3554	0.3554		179982	rs10833192	G	0.4955	0.4573	0.0142	0.3554		179982	rs10833192	G	0.4663	0.4909	0.0142	0.3554		179982	rs10833192	G	0.4893	0.4776	0.0142	0.3554		179982	rs10833192	G	0.4932	0.485	0.0142	0.3554		179982	rs10833192	G	0.4916	0.474	0.0142
179988	15	51477034	53690091	ENSG00000285622	0.0341	0.0522	0.04518	0.09381	0.2859	0.162064		179988	rs7180947	T	0.075	0.06486	0.0437	0.1684		179988	rs7182641	C	0.07584	0.09146	0.0522	0.09381		179988	rs7180947	T	0.07932	0.06303	0.0437	0.1684		179988	rs7181647	T	0.07639	0.05988	0.0341	0.2859		179988	rs7182641	C	0.06772	0.07796	0.0522
180128	1	167090735	168825796		0.0208	0.0247	0.02192	0.1304	0.2163	0.18946		180128	rs169266	T	0.3643	0.3453	0.0208	0.2163		180128	rs169266	T	0.3553	0.2896	0.0208	0.2163		180128	rs169266	T	0.3529	0.3448	0.0208	0.2163		180128	rs7524938	C	0.3493	0.3473	0.0225	0.168		180128	rs200567	A	0.3632	0.3607	0.0247
180264	6	40225964	40333942		0.0144	0.0144	0.0144	0.3822	0.3822	0.3822		180264	rs1077329	G	0.35	0.3171	0.0144	0.3822		180264	rs1077329	G	0.3539	0.3445	0.0144	0.3822		180264	rs1077329	G	0.3503	0.3097	0.0144	0.3822		180264	rs1077329	G	0.3219	0.3593	0.0144	0.3822		180264	rs1077329	G	0.3323	0.3247	0.0144
180378	15	69524430	71740069	THSD4	0.0272	0.0294	0.02896	0.09403	0.1149	0.098204		180378	rs11632349	A	0.3536	0.3354	0.0294	0.09403		180378	rs11632349	A	0.2963	0.3232	0.0294	0.09403		180378	rs751998	T	0.3321	0.2849	0.0272	0.1149		180378	rs11632349	A	0.3014	0.2994	0.0294	0.09403		180378	rs11632349	A	0.2919	0.3041	0.0294
180609	12	38837811	40559127	LINC02471	-0.0281	-0.0222	-0.02536	0.1247	0.2242	0.1705		180609	rs11564276	G	0.2	0.2234	-0.0222	0.2242		180609	rs726330	A	0.226	0.2117	-0.0281	0.1247		180609	rs11564276	G	0.213	0.2473	-0.0222	0.2242		180609	rs726330	A	0.2361	0.2091	-0.0281	0.1247		180609	rs11564194	T	0.2161	0.2138	-0.0262
180625	12	89453783	90781158		-0.0474	-0.0209	-0.0421	0.09418	0.4273	0.160804		180625	rs11532363	A	0.09107	0.102	-0.0474	0.09418		180625	rs11532363	A	0.1113	0.125	-0.0474	0.09418		180625	rs12228375	A	0.09626	0.1164	-0.0209	0.4273		180625	rs11532363	A	0.137	0.1205	-0.0474	0.09418		180625	rs11532363	A	0.1011	0.0973	-0.0474
180756	1	19622481	19738518	CAPZB	-0.0276	-0.0202	-0.02468	0.1015	0.2163	0.1449		180756	rs10753559	G	0.3205	0.3431	-0.0253	0.1338		180756	rs12026907	T	0.3006	0.3171	-0.0202	0.2163		180756	rs12033437	T	0.3157	0.3533	-0.0276	0.1015		180756	rs10753559	G	0.3014	0.3234	-0.0253	0.1338		180756	rs10753558	A	0.3215	0.3573	-0.025
180871	10	93050198	93060218		0.0317	0.0317	0.0317	0.09432	0.09432	0.09432		180871	rs3890159	T	0.3143	0.3324	0.0317	0.09432		180871	rs3890159	T	0.3371	0.2622	0.0317	0.09432		180871	rs3890159	T	0.3445	0.2998	0.0317	0.09432		180871	rs3890159	T	0.2808	0.3084	0.0317	0.09432		180871	rs3890159	T	0.3222	0.3034	0.0317
181017	11	64694259	64937683	SPDYC	-0.0346	-0.0115	-0.02074	0.09441	0.5811	0.386424		181017	rs17743381	T	0.2027	0.2079	-0.0346	0.09441		181017	rs3825073	T	0.1657	0.2012	-0.0115	0.5811		181017	rs17743381	T	0.1625	0.196	-0.0346	0.09441		181017	rs3825073	T	0.1549	0.1605	-0.0115	0.5811		181017	rs3825073	T	0.1588	0.1825	-0.0115
181511	8	29875964	30003619		0.0251	0.0265	0.02538	0.0947	0.1085	0.10574		181511	rs4107736	G	0.4454	0.4578	0.0251	0.1085		181511	rs4107736	G	0.4424	0.4512	0.0251	0.1085		181511	rs12682293	A	0.4463	0.4125	0.0265	0.0947		181511	rs4107736	G	0.4726	0.4701	0.0251	0.1085		181511	rs4107736	G	0.4526	0.4164	0.0251
181777	16	56786202	58233956	CSNK2A2	-0.0249	-0.0157	-0.01758	0.1131	0.3323	0.28698		181777	rs2550364	C	0.4723	0.4961	-0.0157	0.3286		181777	rs37358	T	0.4424	0.4665	-0.0158	0.3323		181777	rs2550364	C	0.4857	0.4952	-0.0157	0.3286		181777	rs37358	T	0.4041	0.491	-0.0158	0.3323		181777	rs2731740	A	0.4753	0.4973	-0.0249
181842	12	53097975	54811708	ITGA5,ENSG00000258086,ENSG00000258137	-0.0478	-0.0384	-0.04216	0.1273	0.2132	0.17884		181842	rs10876558	A	0.06875	0.0837	-0.0478	0.1273		181842	rs11170895	T	0.08287	0.06707	-0.0384	0.2132		181842	rs11170895	T	0.07308	0.07039	-0.0384	0.2132		181842	rs10876558	A	0.06522	0.08232	-0.0478	0.1273		181842	rs11170895	T	0.05426	0.07929	-0.0384
181947	2	67806315	67952811		0.0279	0.0285	0.02814	0.09495	0.105	0.10098		181947	rs4671839	T	0.3295	0.3047	0.0285	0.09495		181947	rs4671839	T	0.3399	0.2805	0.0285	0.09495		181947	rs4671197	T	0.3111	0.3	0.0279	0.105		181947	rs4671197	T	0.2606	0.3598	0.0279	0.105		181947	rs4671197	T	0.3054	0.2991	0.0279
182237	8	42674538	42984073		-0.0531	-0.0335	-0.04824	0.178	0.7343	0.29606		182237	rs7825957	T	0.03036	0.03825	-0.0335	0.7343		182237	rs1620525	A	0.0323	0.03049	-0.0525	0.178		182237	rs1620525	A	0.02763	0.05461	-0.0525	0.178		182237	rs798827	A	0.02083	0.02695	-0.0531	0.1854		182237	rs13261180	C	0.04478	0.04205	-0.0496
182358	8	20709001	20771415		0.0124	0.0311	0.02196	0.09519	0.4859	0.248638		182358	rs2616186	A	0.2607	0.2406	0.0221	0.2207		182358	rs2616186	A	0.2542	0.2043	0.0221	0.2207		182358	rs2028496	A	0.2451	0.2461	0.0124	0.4859		182358	rs2616186	A	0.1712	0.2934	0.0221	0.2207		182358	rs1372352	G	0.235	0.2227	0.0311
182553	17	34196157	36942631	PIP4K2B	-0.0266	-0.0156	-0.0244	0.09529	0.3295	0.142132		182553	rs11653487	C	0.4143	0.4568	-0.0266	0.09529		182553	rs11653487	C	0.4129	0.436	-0.0266	0.09529		182553	rs11653487	C	0.4314	0.4794	-0.0266	0.09529		182553	rs11653487	C	0.4726	0.4755	-0.0266	0.09529		182553	rs1043515	A	0.441	0.4553	-0.0156
182674	7	89483225	89681721	STEAP2-AS1	-0.0249	-0.0184	-0.02282	0.2161	0.3557	0.25732		182674	rs10452943	G	0.2089	0.2106	-0.021	0.2826		182674	rs12671408	C	0.1812	0.2348	-0.0184	0.3557		182674	rs10452944	T	0.1916	0.1875	-0.0249	0.2161		182674	rs10452944	T	0.1849	0.1886	-0.0249	0.2161		182674	rs10452944	T	0.1851	0.207	-0.0249
182995	2	127629514	127915335		0.0236	0.0274	0.02436	0.1322	0.1985	0.18524		182995	rs10496660	C	0.267	0.2522	0.0236	0.1985		182995	rs7422269	A	0.2823	0.2256	0.0274	0.1322		182995	rs10496660	C	0.2709	0.2624	0.0236	0.1985		182995	rs10496660	C	0.2534	0.247	0.0236	0.1985		182995	rs10496660	C	0.2795	0.2802	0.0236
183142	16	87594028	89066527	ENSG00000259989	-0.0245	-0.0172	-0.01938	0.1474	0.3026	0.263		183142	rs6500514	C	0.3295	0.3453	-0.0172	0.3026		183142	rs7498845	T	0.368	0.372	-0.019	0.2812		183142	rs7498845	T	0.3422	0.3442	-0.019	0.2812		183142	rs6500514	C	0.25	0.3879	-0.0172	0.3026		183142	rs11076745	A	0.3328	0.3709	-0.0245
183451	1	20855218	20985796	CDA	-0.0263	-0.0232	-0.02502	0.09581	0.1415	0.114722		183451	rs558946	A	0.3884	0.4195	-0.0232	0.1415		183451	rs558946	A	0.3652	0.4512	-0.0232	0.1415		183451	rs4704	G	0.3993	0.4218	-0.0261	0.09899		183451	rs625149	G	0.4452	0.4398	-0.0263	0.09581		183451	rs625149	G	0.3975	0.3995	-0.0263
183543	10	7934233	7985977	TAF3	-0.0262	-0.0202	-0.0239	0.09811	0.2154	0.145882		183543	rs10508338	T	0.3464	0.3625	-0.0238	0.1528		183543	rs10508338	T	0.3624	0.378	-0.0238	0.1528		183543	rs10795572	A	0.3473	0.3811	-0.0262	0.09811		183543	rs2388431	T	0.3767	0.4012	-0.0202	0.2154		183543	rs10752119	G	0.3738	0.3801	-0.0255
183908	1	238049013	239982638	CHRM3	-0.0335	-0.0267	-0.02942	0.09608	0.1983	0.157412		183908	rs1578180	A	0.1821	0.2045	-0.0335	0.09608		183908	rs1578180	A	0.1699	0.2073	-0.0335	0.09608		183908	rs1072319	T	0.1943	0.2	-0.0267	0.1983		183908	rs1072319	T	0.1849	0.1886	-0.0267	0.1983		183908	rs1072319	T	0.185	0.214	-0.0267
183995	1	97355915	97542479		0.0238	0.0248	0.024	0.1564	0.1605	0.15968		183995	rs17430460	C	0.3027	0.286	0.0238	0.1605		183995	rs17430460	C	0.3188	0.2561	0.0238	0.1605		183995	rs17471640	C	0.295	0.2816	0.0248	0.1564		183995	rs17430460	C	0.2603	0.2754	0.0238	0.1605		183995	rs17430460	C	0.2826	0.2842	0.0238
184355	5	42984638	43020395	ENSG00000287263	-0.0179	-0.0179	-0.0179	0.3421	0.3421	0.3421		184355	rs186322	G	0.1973	0.2256	-0.0179	0.3421		184355	rs186322	G	0.1966	0.2226	-0.0179	0.3421		184355	rs186322	G	0.2009	0.2061	-0.0179	0.3421		184355	rs186322	G	0.2397	0.2425	-0.0179	0.3421		184355	rs186322	G	0.1948	0.2162	-0.0179
184527	9	132611594	133635546	ABL1	-0.0269	-0.0246	-0.02526	0.1359	0.1655	0.15472		184527	rs2253084	T	0.2598	0.2882	-0.0246	0.1655		184527	rs2855159	A	0.2486	0.2591	-0.0269	0.1359		184527	rs2253084	T	0.262	0.2718	-0.0246	0.1655		184527	rs2253084	T	0.2466	0.2395	-0.0246	0.1655		184527	rs10793970	C	0.2583	0.2949	-0.0256
184827	14	61143991	62074238	ENSG00000232774,ENSG00000258989	0.0377	0.0426	0.03868	0.09832	0.1412	0.132624		184827	rs17834568	G	0.1013	0.0885	0.0377	0.1412		184827	rs17834568	G	0.1096	0.09146	0.0377	0.1412		184827	rs17834568	G	0.1134	0.08424	0.0377	0.1412		184827	rs17834568	G	0.06849	0.1018	0.0377	0.1412		184827	rs13379170	A	0.1067	0.09481	0.0426
184843	9	105462679	106459868		0.0203	0.0281	0.02466	0.1009	0.2387	0.15814		184843	rs368956	G	0.3089	0.2932	0.0234	0.1751		184843	rs368956	G	0.2823	0.314	0.0234	0.1751		184843	rs1858095	A	0.2932	0.2655	0.0281	0.1009		184843	rs1858095	A	0.3194	0.253	0.0281	0.1009		184843	rs1392031	T	0.3005	0.2769	0.0203
184882	10	25958020	25998026	LINC00836	0.0235	0.0235	0.0235	0.26	0.26	0.26		184882	rs11014665	C	0.1848	0.1643	0.0235	0.26		184882	rs11014665	C	0.1685	0.2195	0.0235	0.26		184882	rs11014665	C	0.2032	0.1697	0.0235	0.26		184882	rs11014665	C	0.1986	0.1909	0.0235	0.26		184882	rs11014665	C	0.1842	0.1709	0.0235
185464	17	52137513	54782514		-0.0299	-0.0215	-0.02564	0.09696	0.2369	0.166364		185464	rs227715	G	0.208	0.2256	-0.0215	0.2369		185464	rs227718	C	0.2444	0.2256	-0.0254	0.1641		185464	rs227715	G	0.2389	0.2273	-0.0215	0.2369		185464	rs227722	A	0.2466	0.2126	-0.0299	0.09696		185464	rs227722	A	0.2192	0.2531	-0.0299
185590	5	163197883	163265540		0.011	0.0299	0.01988	0.09704	0.5557	0.323188		185590	rs10050929	G	0.267	0.2267	0.0195	0.2869		185590	rs4426936	A	0.2205	0.189	0.011	0.5557		185590	rs2860804	A	0.2684	0.2344	0.0299	0.09704		185590	rs4426936	A	0.1644	0.2246	0.011	0.5557		185590	rs2860807	A	0.2505	0.2739	0.028
185762	11	123800592	124295382		-0.0223	-0.0187	-0.02014	0.2245	0.2919	0.27804		185762	rs1893705	T	0.2446	0.245	-0.0199	0.2919		185762	rs1893705	T	0.2121	0.2713	-0.0199	0.2919		185762	rs1893705	T	0.2246	0.2394	-0.0199	0.2919		185762	rs3867247	A	0.2778	0.2425	-0.0187	0.29		185762	rs2106649	T	0.2129	0.2513	-0.0223
185915	11	59523075	59767621	OOSP4B	0.0318	0.0435	0.03598	0.09722	0.2716	0.197504		185915	rs11230115	C	0.07411	0.06541	0.0318	0.2716		185915	rs538112	C	0.1166	0.05488	0.0374	0.1757		185915	rs563748	G	0.1025	0.08343	0.0353	0.1732		185915	rs637131	A	0.1181	0.1175	0.0435	0.09722		185915	rs12226303	T	0.07256	0.07092	0.0319
186007	4	172487231	172723806	LINC02174	0.0198	0.0309	0.02424	0.09863	0.3053	0.222632		186007	rs10009454	T	0.2143	0.2101	0.0309	0.09863		186007	rs10009454	T	0.2374	0.186	0.0309	0.09863		186007	rs11939052	C	0.1961	0.2024	0.0198	0.3053		186007	rs11939052	C	0.2708	0.1898	0.0198	0.3053		186007	rs11939052	C	0.2424	0.2157	0.0198
186358	6	5324227	5387513	FARS2	-0.022	-0.0198	-0.02068	0.1877	0.2254	0.21032		186358	rs2432749	C	0.4348	0.4296	-0.022	0.1877		186358	rs2432755	C	0.3455	0.4024	-0.0198	0.2254		186358	rs2432749	C	0.3939	0.437	-0.022	0.1877		186358	rs2432755	C	0.3767	0.3862	-0.0198	0.2254		186358	rs2432755	C	0.3636	0.3905	-0.0198
186360	7	20603957	20637432		0.0198	0.0306	0.02494	0.09747	0.2605	0.178788		186360	rs17143109	C	0.2303	0.2139	0.0306	0.09747		186360	rs17143109	C	0.2331	0.2195	0.0306	0.09747		186360	rs10488583	G	0.2718	0.2448	0.0198	0.2605		186360	rs10488583	G	0.3082	0.1886	0.0198	0.2605		186360	rs10228034	G	0.2677	0.2639	0.0239
187266	11	22991279	23046545		0.0218	0.0294	0.02356	0.09798	0.2101	0.181796		187266	rs2433479	G	0.3045	0.2827	0.0218	0.2101		187266	rs2433479	G	0.2921	0.2256	0.0218	0.2101		187266	rs2433479	G	0.2799	0.2836	0.0218	0.2101		187266	rs3862134	G	0.1986	0.3084	0.023	0.1807		187266	rs1426853	T	0.2645	0.2858	0.0294
187553	14	68355017	69301705		-0.0225	-0.0175	-0.01946	0.144	0.2788	0.22388		187553	rs7142145	A	0.4527	0.464	-0.0191	0.2322		187553	rs7142145	A	0.4789	0.4909	-0.0191	0.2322		187553	rs4899263	G	0.4455	0.4866	-0.0225	0.144		187553	rs7142145	A	0.4521	0.479	-0.0191	0.2322		187553	rs10873217	G	0.452	0.4794	-0.0175
187691	21	14970937	16051665	ENSG00000232884	-0.0217	-0.0216	-0.02168	0.2607	0.2735	0.27094		187691	rs2822830	A	0.2125	0.2134	-0.0217	0.2735		187691	rs2822830	A	0.184	0.2348	-0.0217	0.2735		187691	rs2005940	A	0.2077	0.2087	-0.0216	0.2607		187691	rs2822830	A	0.2639	0.172	-0.0217	0.2735		187691	rs2822830	A	0.1824	0.2139	-0.0217
187926	22	19683328	21353328		0.0267	0.0267	0.0267	0.09835	0.09835	0.09835		187926	rs178297	G	0.3482	0.3647	0.0267	0.09835		187926	rs178297	G	0.3272	0.3811	0.0267	0.09835		187926	rs178297	G	0.3717	0.3261	0.0267	0.09835		187926	rs178297	G	0.3493	0.3343	0.0267	0.09835		187926	rs178297	G	0.3572	0.3564	0.0267
188096	1	102014029	102241441	LINC01709	0.0196	0.0201	0.0198	0.2086	0.2335	0.22354		188096	rs1470438	A	0.3929	0.3764	0.0201	0.2086		188096	rs1470438	A	0.4143	0.3872	0.0201	0.2086		188096	rs1020368	T	0.4064	0.363	0.0196	0.2335		188096	rs1020368	T	0.3819	0.3735	0.0196	0.2335		188096	rs1020368	T	0.3903	0.3626	0.0196
188173	9	11576357	11586357		0.0261	0.027	0.02628	0.1128	0.1235	0.12136		188173	rs10959970	A	0.2987	0.2749	0.0261	0.1235		188173	rs10959970	A	0.2753	0.2378	0.0261	0.1235		188173	rs10959970	A	0.2852	0.2879	0.0261	0.1235		188173	rs10959970	A	0.2877	0.2831	0.0261	0.1235		188173	rs10959965	T	0.2817	0.2531	0.027
188848	2	232114701	232408269		0.0252	0.0289	0.02604	0.1188	0.1912	0.17376		188848	rs1797397	G	0.2527	0.1993	0.0252	0.1912		188848	rs1797397	G	0.2261	0.2043	0.0252	0.1912		188848	rs1797399	T	0.2264	0.2085	0.0257	0.1764		188848	rs1797397	G	0.2397	0.247	0.0252	0.1912		188848	rs1667314	T	0.2354	0.2072	0.0289
189085	7	70661813	71023877	GALNT17	-0.0266	-0.0266	-0.0266	0.09904	0.09904	0.09904		189085	rs7806531	T	0.3804	0.4002	-0.0266	0.09904		189085	rs7806531	T	0.3722	0.4329	-0.0266	0.09904		189085	rs7806531	T	0.3859	0.3848	-0.0266	0.09904		189085	rs7806531	T	0.3562	0.3713	-0.0266	0.09904		189085	rs7806531	T	0.383	0.3959	-0.0266
189133	1	215260310	217193687	ESRRG	-0.0274	-0.0199	-0.0229	0.124	0.2547	0.20242		189133	rs11117750	C	0.2509	0.2772	-0.0274	0.124		189133	rs11117750	C	0.2612	0.3171	-0.0274	0.124		189133	rs10863288	C	0.3111	0.2952	-0.0199	0.2547		189133	rs10863288	C	0.3082	0.2771	-0.0199	0.2547		189133	rs10863288	C	0.2789	0.3068	-0.0199
189784	4	87794302	88027661		0.0255	0.031	0.0266	0.09944	0.1918	0.173328		189784	rs10015508	C	0.2304	0.214	0.0255	0.1918		189784	rs10015508	C	0.2233	0.1982	0.0255	0.1918		189784	rs13120839	C	0.1925	0.1958	0.031	0.09944		189784	rs10015508	C	0.2534	0.197	0.0255	0.1918		189784	rs10015508	C	0.1893	0.2104	0.0255
189831	17	66567727	69029047		0.0226	0.0263	0.02436	0.1106	0.1737	0.13526		189831	rs2108396	C	0.3839	0.3598	0.0237	0.1365		189831	rs9911781	G	0.3764	0.4085	0.0263	0.1106		189831	rs2886907	C	0.3859	0.3463	0.0226	0.1737		189831	rs7215208	T	0.363	0.3653	0.0245	0.1339		189831	rs1558832	C	0.3976	0.3702	0.0247
190265	15	66419741	68632687	ITGA11	0.0419	0.0533	0.04646	0.09969	0.2175	0.170376		190265	rs6494736	C	0.05993	0.04989	0.0419	0.2175		190265	rs6494736	C	0.0632	0.05488	0.0419	0.2175		190265	rs6494736	C	0.06952	0.05636	0.0419	0.2175		190265	rs7176011	G	0.1	0.0512	0.0533	0.09969		190265	rs7176011	G	0.06953	0.05505	0.0533
190573	10	30698873	30768107	MAP3K8	-0.024	-0.0186	-0.02184	0.1295	0.2495	0.17794		190573	rs1042058	T	0.4071	0.4246	-0.0186	0.2495		190573	rs2480277	A	0.3915	0.4543	-0.024	0.1295		190573	rs1042058	T	0.4109	0.3915	-0.0186	0.2495		190573	rs2480277	A	0.3542	0.4127	-0.024	0.1295		190573	rs1543725	A	0.4021	0.4159	-0.024
191701	11	17509681	17559018	USH1C	-0.0256	-0.024	-0.0247	0.1005	0.1243	0.11376		191701	rs2041027	A	0.3991	0.4385	-0.0256	0.1005		191701	rs2237959	G	0.4045	0.4848	-0.0243	0.1192		191701	rs2041027	A	0.4554	0.4211	-0.0256	0.1005		191701	rs2237957	A	0.4041	0.3982	-0.024	0.1243		191701	rs2237957	A	0.4043	0.4418	-0.024
191919	13	34818471	35886675	NBEA	-0.0236	-0.0171	-0.01948	0.2603	0.4252	0.3629		191919	rs2244882	G	0.158	0.1835	-0.0171	0.4252		191919	rs2244882	G	0.1394	0.2165	-0.0171	0.4252		191919	rs1856379	G	0.1462	0.1873	-0.0236	0.2603		191919	rs2244882	G	0.2123	0.1557	-0.0171	0.4252		191919	rs1160720	G	0.157	0.1724	-0.0225
191977	2	131447934	131731464	ARHGEF4	0.0296	0.0341	0.03268	0.1007	0.1534	0.1164		191977	rs4314035	C	0.2054	0.1906	0.0341	0.1007		191977	rs6718816	A	0.1756	0.1707	0.0328	0.1136		191977	rs4314035	C	0.1996	0.1659	0.0341	0.1007		191977	rs6718816	A	0.1644	0.1617	0.0328	0.1136		191977	rs6430431	T	0.1735	0.181	0.0296
192035	7	122322124	122542645		0.025	0.0266	0.02564	0.1007	0.1266	0.11624		192035	rs10260099	C	0.407	0.3873	0.0266	0.1007		192035	rs2428769	C	0.3947	0.4116	0.025	0.1266		192035	rs10260099	C	0.4198	0.3788	0.0266	0.1007		192035	rs2428769	C	0.3699	0.4311	0.025	0.1266		192035	rs2428769	C	0.3853	0.3909	0.025
192364	7	24447488	24492578	ENSG00000287523	-0.0623	-0.0585	-0.05926	0.1402	0.1565	0.15324		192364	rs7799805	A	0.03125	0.04047	-0.0585	0.1565		192364	rs7799805	A	0.02528	0.03963	-0.0585	0.1565		192364	rs7799805	A	0.04189	0.03576	-0.0585	0.1565		192364	rs7799805	A	0.0411	0.0479	-0.0585	0.1565		192364	rs10282438	T	0.03425	0.0483	-0.0623
192902	9	7374532	7384126		-0.0756	-0.0503	-0.06448	0.1012	0.2714	0.17066		192902	rs16925989	T	0.03304	0.04435	-0.0572	0.2183		192902	rs6477191	C	0.0309	0.03354	-0.0756	0.1012		192902	rs12338952	G	0.03832	0.04369	-0.0637	0.1612		192902	rs6477191	C	0.0411	0.03593	-0.0756	0.1012		192902	rs10976272	G	0.04516	0.03432	-0.0503
193247	7	62278968	62641533		-0.0181	-0.0181	-0.0181	0.2721	0.2721	0.2721		193247	rs1806453	C	0.3795	0.4013	-0.0181	0.2721		193247	rs1806453	C	0.3598	0.3589	-0.0181	0.2721		193247	rs1806453	C	0.3516	0.4059	-0.0181	0.2721		193247	rs1806453	C	0.4726	0.3614	-0.0181	0.2721		193247	rs1806453	C	0.3876	0.3755	-0.0181
193326	17	14671928	14731203		0.0224	0.0224	0.0224	0.1754	0.1754	0.1754		193326	rs7215329	A	0.2946	0.3099	0.0224	0.1754		193326	rs7215329	A	0.3315	0.2988	0.0224	0.1754		193326	rs7215329	A	0.3066	0.303	0.0224	0.1754		193326	rs7215329	A	0.3288	0.2844	0.0224	0.1754		193326	rs7215329	A	0.3379	0.3068	0.0224
193462	12	22722452	22798170	ETNK1	0.0198	0.0211	0.02006	0.1912	0.2118	0.20768		193462	rs10770911	A	0.4116	0.3841	0.0198	0.2118		193462	rs10770911	A	0.4533	0.392	0.0198	0.2118		193462	rs10770914	C	0.4483	0.4085	0.0211	0.1912		193462	rs10770911	A	0.4577	0.4387	0.0198	0.2118		193462	rs10770911	A	0.3989	0.4092	0.0198
193639	14	77009202	77930407	AHSA1	-0.0185	-0.0175	-0.01806	0.2272	0.27	0.25736		193639	rs1061629	C	0.4545	0.4939	-0.0181	0.2632		193639	rs17824316	G	0.4986	0.4207	-0.0185	0.2272		193639	rs11622359	T	0.4554	0.4939	-0.0175	0.27		193639	rs1061629	C	0.4795	0.476	-0.0181	0.2632		193639	rs1061629	C	0.4636	0.4838	-0.0181
194116	11	16285686	16329549	SOX6	0.0165	0.0264	0.02036	0.1019	0.292	0.21664		194116	rs10832577	A	0.4589	0.4173	0.0165	0.292		194116	rs10832577	A	0.4368	0.3689	0.0165	0.292		194116	rs10832593	C	0.3946	0.4206	0.0264	0.1019		194116	rs297366	C	0.411	0.403	0.0257	0.1104		194116	rs10219384	T	0.4145	0.4319	0.0167
194167	18	40853235	42606091	SETBP1	-0.0061	-0.0038	-0.00542	0.7179	0.8293	0.75164		194167	rs12457805	A	0.2893	0.306	-0.0061	0.7179		194167	rs9967367	T	0.2879	0.2744	-0.005	0.7752		194167	rs12457805	A	0.2647	0.2891	-0.0061	0.7179		194167	rs12457805	A	0.2671	0.2605	-0.0061	0.7179		194167	rs11876574	C	0.2932	0.3193	-0.0038
194398	6	152251568	152293261	ESR1	0.0225	0.0315	0.0279	0.1021	0.2258	0.15158		194398	rs6912184	G	0.2277	0.2129	0.0225	0.2258		194398	rs6912184	G	0.2177	0.2331	0.0225	0.2258		194398	rs2347868	T	0.2389	0.2345	0.0315	0.1021		194398	rs2347868	T	0.1781	0.203	0.0315	0.1021		194398	rs2347868	T	0.2397	0.2159	0.0315
194639	13	109916103	111119077	COL4A2	-0.0239	-0.0184	-0.0226	0.1312	0.2436	0.16108		194639	rs1983931	G	0.3714	0.3991	-0.0239	0.1312		194639	rs3803236	C	0.3775	0.3567	-0.0236	0.1534		194639	rs1983931	G	0.3708	0.415	-0.0239	0.1312		194639	rs7995158	A	0.4178	0.3503	-0.0184	0.2436		194639	rs3803234	A	0.3983	0.3784	-0.0232
195357	1	59408458	59635870	FGGY-DT,LINC01358	-0.0313	-0.0291	-0.03042	0.1218	0.1555	0.13528		195357	rs3850542	A	0.1705	0.168	-0.0313	0.1218		195357	rs3850542	A	0.1629	0.2256	-0.0313	0.1218		195357	rs3850542	A	0.1631	0.1752	-0.0313	0.1218		195357	rs6676724	A	0.137	0.1826	-0.0291	0.1555		195357	rs6676724	A	0.15	0.1744	-0.0291
195365	2	2611716	2632709		-0.0105	-0.0105	-0.0105	0.566	0.566	0.566		195365	rs11685339	G	0.2089	0.2533	-0.0105	0.566		195365	rs11685339	G	0.2388	0.2239	-0.0105	0.566		195365	rs11685339	G	0.2112	0.2257	-0.0105	0.566		195365	rs11685339	G	0.3082	0.2395	-0.0105	0.566		195365	rs11685339	G	0.2107	0.246	-0.0105
195598	10	116301521	116311938	ABLIM1	-0.0306	-0.026	-0.02968	0.1028	0.1987	0.12198		195598	rs986212	T	0.2214	0.2361	-0.0306	0.1028		195598	rs986212	T	0.264	0.247	-0.0306	0.1028		195598	rs986212	T	0.2059	0.2394	-0.0306	0.1028		195598	rs986212	T	0.2603	0.2874	-0.0306	0.1028		195598	rs10749169	T	0.1907	0.2111	-0.026
195854	1	36792143	37019556		0.0138	0.0218	0.0186	0.1961	0.4045	0.27946		195854	rs11263915	A	0.3946	0.362	0.0138	0.4045		195854	rs17498436	C	0.4003	0.3415	0.0218	0.1961		195854	rs11263915	A	0.4046	0.3758	0.0138	0.4045		195854	rs17498436	C	0.3014	0.4222	0.0218	0.1961		195854	rs17498436	C	0.3749	0.3927	0.0218
197054	16	5445638	5505637	RBFOX1	0.02	0.0248	0.02288	0.1627	0.212	0.18242		197054	rs11644039	A	0.3938	0.3631	0.0248	0.1627		197054	rs653127	G	0.3803	0.3902	0.02	0.212		197054	rs653127	G	0.3672	0.3733	0.02	0.212		197054	rs11644039	A	0.4521	0.4102	0.0248	0.1627		197054	rs11644039	A	0.4034	0.3566	0.0248
197116	3	3949224	3974718	SUMF1,ENSG00000287720	-0.0192	-0.0169	-0.01848	0.2428	0.3044	0.26102		197116	rs10780027	T	0.2938	0.3259	-0.0182	0.2676		197116	rs1825503	G	0.3132	0.3476	-0.0192	0.2428		197116	rs1244004	C	0.295	0.3424	-0.0189	0.2475		197116	rs1825503	G	0.2671	0.3242	-0.0192	0.2428		197116	rs1116189	T	0.3465	0.325	-0.0169
197195	11	60460789	60697138	ZP1	-0.0263	-0.0139	-0.01952	0.1037	0.3674	0.2399		197195	rs2072098	A	0.3982	0.3697	-0.016	0.3054		197195	rs7946859	C	0.3287	0.4238	-0.0263	0.1037		197195	rs2469887	T	0.3913	0.4455	-0.0258	0.1052		197195	rs3763840	A	0.4583	0.4	-0.0156	0.3178		197195	rs2023854	G	0.4213	0.4185	-0.0139
197296	3	191342386	192825840		-0.0284	-0.0267	-0.02806	0.1117	0.1361	0.11658		197296	rs2037576	G	0.267	0.2489	-0.0284	0.1117		197296	rs2037578	G	0.2205	0.2761	-0.0267	0.1361		197296	rs2037576	G	0.2487	0.2315	-0.0284	0.1117		197296	rs2037576	G	0.2808	0.2515	-0.0284	0.1117		197296	rs2037576	G	0.2311	0.263	-0.0284
197609	16	48490307	49934675		-0.0258	-0.018	-0.01956	0.1175	0.2764	0.24462		197609	rs4785195	T	0.3777	0.3947	-0.018	0.2764		197609	rs4785195	T	0.3764	0.3933	-0.018	0.2764		197609	rs4785195	T	0.3777	0.3908	-0.018	0.2764		197609	rs4785195	T	0.3973	0.3404	-0.018	0.2764		197609	rs12447907	G	0.3409	0.3962	-0.0258
197636	1	94298211	94532562	ABCA4	-0.0301	-0.0254	-0.02758	0.1098	0.1894	0.14668		197636	rs1191228	T	0.2018	0.23	-0.0254	0.1894		197636	rs553608	T	0.2022	0.2317	-0.026	0.185		197636	rs521538	A	0.2089	0.2388	-0.0282	0.1246		197636	rs521538	A	0.2466	0.1826	-0.0282	0.1246		197636	rs17110929	T	0.214	0.1962	-0.0301
198203	8	53068920	53231473	ST18	-0.0272	-0.0272	-0.0272	0.1795	0.1795	0.1795		198203	rs17290977	T	0.1812	0.214	-0.0272	0.1795		198203	rs17290977	T	0.1938	0.1718	-0.0272	0.1795		198203	rs17290977	T	0.1774	0.1939	-0.0272	0.1795		198203	rs17290977	T	0.1849	0.1898	-0.0272	0.1795		198203	rs17290977	T	0.1737	0.1953	-0.0272
198360	7	121767778	122007319	CADPS2,ENSG00000240499	0.0224	0.0277	0.02508	0.1044	0.2109	0.15356		198360	rs6965749	G	0.3554	0.3348	0.0252	0.2109		198360	rs9641684	A	0.3708	0.3171	0.0224	0.1706		198360	rs1154609	C	0.3503	0.303	0.0277	0.1044		198360	rs1154609	C	0.3151	0.3473	0.0277	0.1044		198360	rs10267604	G	0.3176	0.3195	0.0224
198472	2	181090236	181381991		-0.0271	-0.0271	-0.0271	0.1045	0.1045	0.1045		198472	rs714545	A	0.2848	0.3113	-0.0271	0.1045		198472	rs714545	A	0.2921	0.3049	-0.0271	0.1045		198472	rs714545	A	0.2995	0.2915	-0.0271	0.1045		198472	rs714545	A	0.2055	0.3253	-0.0271	0.1045		198472	rs714545	A	0.3039	0.3122	-0.0271
198841	5	2371873	2429332		0.0207	0.0307	0.0267	0.1047	0.2429	0.15998		198841	rs10036992	A	0.2607	0.2655	0.0307	0.1047		198841	rs16899405	G	0.2893	0.2591	0.0207	0.2429		198841	rs16899405	G	0.2763	0.2612	0.0207	0.2429		198841	rs10036992	A	0.3356	0.2096	0.0307	0.1047		198841	rs10036992	A	0.2589	0.2348	0.0307
198930	16	27156744	27249381	NSMCE1	-0.0265	-0.0209	-0.02532	0.1174	0.206	0.1362		198930	rs2958	A	0.3223	0.3487	-0.0209	0.206		198930	rs7186985	C	0.3385	0.3293	-0.0264	0.1192		198930	rs7186985	C	0.3193	0.3217	-0.0264	0.1192		198930	rs7186985	C	0.2808	0.3263	-0.0264	0.1192		198930	rs7186151	A	0.3344	0.3638	-0.0265
198986	3	153396096	154878786	LINC02006	0.0231	0.0239	0.02326	0.1469	0.147	0.14692		198986	rs1490543	G	0.4054	0.3708	0.0231	0.1469		198986	rs1490543	G	0.3764	0.3506	0.0231	0.1469		198986	rs1490543	G	0.3538	0.3679	0.0231	0.1469		198986	rs1490543	G	0.4041	0.3533	0.0231	0.1469		198986	rs1403611	T	0.3499	0.316	0.0239
199238	16	9121381	9212987	C16orf72	0.0234	0.026	0.02548	0.1135	0.1361	0.11802		199238	rs1048687	T	0.4295	0.398	0.026	0.1135		199238	rs1048687	T	0.4438	0.3811	0.026	0.1135		199238	rs3743832	A	0.4234	0.4084	0.0234	0.1361		199238	rs1048687	T	0.375	0.4042	0.026	0.1135		199238	rs1048687	T	0.4122	0.4248	0.026
199289	3	13141918	13166918	IQSEC1	-0.0341	-0.0341	-0.0341	0.105	0.105	0.105		199289	rs360738	G	0.1339	0.1269	-0.0341	0.105		199289	rs360738	G	0.1699	0.1768	-0.0341	0.105		199289	rs360738	G	0.1381	0.1624	-0.0341	0.105		199289	rs360738	G	0.1644	0.1407	-0.0341	0.105		199289	rs360738	G	0.1461	0.1688	-0.0341
199293	3	63788694	63820493	C3orf49,THOC7	-0.0307	-0.0292	-0.0301	0.1333	0.1355	0.13418		199293	rs2087704	T	0.2286	0.2134	-0.0307	0.1333		199293	rs7614311	C	0.1882	0.2043	-0.0292	0.1355		199293	rs7614311	C	0.1934	0.2036	-0.0292	0.1355		199293	rs2087704	T	0.2192	0.1707	-0.0307	0.1333		199293	rs2087704	T	0.1993	0.2227	-0.0307
199317	5	164835158	164909862	ENSG00000253693	-0.032	-0.0235	-0.0252	0.1092	0.2264	0.20282		199317	rs12153294	G	0.1929	0.2131	-0.0235	0.2264		199317	rs5002678	G	0.1643	0.2287	-0.0235	0.2257		199317	rs17077103	T	0.2068	0.1861	-0.032	0.1092		199317	rs12153294	G	0.2808	0.2121	-0.0235	0.2264		199317	rs12153294	G	0.2247	0.2264	-0.0235
199401	16	4870101	4930100	UBN1	-0.0253	-0.0235	-0.02458	0.1164	0.1573	0.13276		199401	rs1876359	T	0.3607	0.3891	-0.0235	0.1573		199401	rs2251666	A	0.3567	0.3567	-0.0253	0.1164		199401	rs1876359	T	0.3387	0.3594	-0.0235	0.1573		199401	rs2251666	A	0.3264	0.3313	-0.0253	0.1164		199401	rs2251666	A	0.3453	0.3851	-0.0253
199754	18	12549850	12612345	SPIRE1	-0.0265	-0.0194	-0.02358	0.1206	0.2413	0.17058		199754	rs723836	T	0.3464	0.3431	-0.0194	0.2413		199754	rs12604184	C	0.3497	0.3354	-0.0263	0.1206		199754	rs12604184	C	0.3048	0.3424	-0.0263	0.1206		199754	rs723836	T	0.3562	0.3802	-0.0194	0.2413		199754	rs1864532	A	0.307	0.3462	-0.0265
199846	7	83482921	83786692	SEMA3A	0.002	0.0088	0.00494	0.7975	0.9522	0.8849		199846	rs1534075	C	0.06607	0.0582	0.002	0.9522		199846	rs17158529	T	0.06882	0.05488	0.0088	0.7975		199846	rs1534075	C	0.07041	0.05394	0.002	0.9522		199846	rs3801631	A	0.04795	0.06287	0.0032	0.9228		199846	rs13437857	G	0.06857	0.04919	0.0087
200060	11	13047020	13122553	ENSG00000255558	-0.0624	-0.0443	-0.05314	0.1054	0.2695	0.17908		200060	rs10831950	A	0.02768	0.04213	-0.0624	0.1054		200060	rs7126761	T	0.03933	0.03963	-0.0443	0.2695		200060	rs10430831	G	0.02317	0.04	-0.053	0.1735		200060	rs10430831	G	0.0411	0.03293	-0.053	0.1735		200060	rs10430831	G	0.04478	0.04025	-0.053
200179	3	178540230	180022924	KCNMB2,KCNMB2-AS1,ENSG00000275163	0.0193	0.0221	0.02042	0.3428	0.3909	0.37166		200179	rs11914342	T	0.1467	0.1254	0.0221	0.3428		200179	rs11914342	T	0.1278	0.1067	0.0221	0.3428		200179	rs11929676	T	0.1643	0.1364	0.0193	0.3909		200179	rs11929676	T	0.1575	0.1768	0.0193	0.3909		200179	rs11929676	T	0.1394	0.135	0.0193
200247	10	94471975	94486842		-0.0401	-0.035	-0.03908	0.1333	0.1798	0.14332		200247	rs2497313	T	0.1116	0.1308	-0.0401	0.1333		200247	rs2497313	T	0.1138	0.09451	-0.0401	0.1333		200247	rs2497311	T	0.09804	0.1206	-0.0401	0.1351		200247	rs2497311	T	0.1096	0.1287	-0.0401	0.1351		200247	rs11187150	T	0.09134	0.1234	-0.035
200278	12	93873180	95349049	NDUFA12	-0.0283	-0.0235	-0.02734	0.1055	0.166	0.1176		200278	rs4923680	C	0.3107	0.321	-0.0283	0.1055		200278	rs4923680	C	0.3034	0.2927	-0.0283	0.1055		200278	rs4923680	C	0.2692	0.3236	-0.0283	0.1055		200278	rs4923680	C	0.3219	0.2695	-0.0283	0.1055		200278	rs4923679	T	0.294	0.3327	-0.0235
200318	19	55535972	60227784	GP6,GP6-AS1	-0.0242	-0.0242	-0.0242	0.2373	0.2373	0.2373		200318	rs11669150	C	0.2107	0.2422	-0.0242	0.2373		200318	rs11669150	C	0.2107	0.2256	-0.0242	0.2373		200318	rs11669150	C	0.2317	0.2373	-0.0242	0.2373		200318	rs11669150	C	0.25	0.2609	-0.0242	0.2373		200318	rs11669150	C	0.2009	0.2271	-0.0242
200379	3	148728842	150291687	GYG1	0.0187	0.0202	0.01924	0.2066	0.2677	0.24782		200379	rs3772573	G	0.3518	0.3185	0.0187	0.2677		200379	rs9850529	A	0.3427	0.314	0.0202	0.2066		200379	rs2607997	T	0.3307	0.3636	0.0199	0.2294		200379	rs3772573	G	0.363	0.2934	0.0187	0.2677		200379	rs3772573	G	0.3302	0.2941	0.0187
200436	9	20786994	20811421	FOCAD	0.0205	0.0243	0.02346	0.1718	0.2455	0.18804		200436	rs10511682	G	0.2366	0.2123	0.0243	0.1718		200436	rs10511682	G	0.236	0.1951	0.0243	0.1718		200436	rs10511682	G	0.238	0.2333	0.0243	0.1718		200436	rs10964709	A	0.2397	0.2665	0.0239	0.1793		200436	rs10511686	C	0.2361	0.2102	0.0205
200781	12	122341080	123796238	SBNO1	-0.0361	-0.0303	-0.03146	0.1756	0.2444	0.23064		200781	rs10773003	A	0.075	0.08703	-0.0303	0.2444		200781	rs4759375	T	0.09375	0.108	-0.0361	0.1756		200781	rs10773003	A	0.1025	0.09697	-0.0303	0.2444		200781	rs10773003	A	0.1233	0.06061	-0.0303	0.2444		200781	rs10773003	A	0.07855	0.1091	-0.0303
201210	2	2605807	2626800		-0.0229	-0.0229	-0.0229	0.205	0.205	0.205		201210	rs2385306	G	0.2249	0.2586	-0.0229	0.205		201210	rs2385306	G	0.2289	0.2165	-0.0229	0.205		201210	rs2385306	G	0.2103	0.2382	-0.0229	0.205		201210	rs2385306	G	0.3219	0.2485	-0.0229	0.205		201210	rs2385306	G	0.2295	0.2625	-0.0229
201432	7	36219537	36253012	EEPD1	-0.0379	-0.0379	-0.0379	0.1747	0.1747	0.1747		201432	rs10277506	C	0.075	0.1042	-0.0379	0.1747		201432	rs10277506	C	0.1039	0.08841	-0.0379	0.1747		201432	rs10277506	C	0.0918	0.1	-0.0379	0.1747		201432	rs10277506	C	0.09589	0.08735	-0.0379	0.1747		201432	rs10277506	C	0.08703	0.1049	-0.0379
201599	7	8281023	8316594	ENSG00000229970	-0.0257	-0.0167	-0.0211	0.1063	0.2967	0.19364		201599	rs1558557	A	0.4607	0.4789	-0.0225	0.1514		201599	rs6965830	G	0.4986	0.4848	-0.0199	0.2178		201599	rs10276256	T	0.4358	0.48	-0.0257	0.1063		201599	rs6463790	G	0.4932	0.4641	-0.0207	0.196		201599	rs10225817	T	0.4862	0.4809	-0.0167
201829	16	10128367	10170654	GRIN2A	0.0081	0.0412	0.02274	0.1064	0.7573	0.44094		201829	rs13336632	C	0.108	0.09257	0.0161	0.5364		201829	rs9933111	G	0.0941	0.1128	0.0081	0.7573		201829	rs1448253	C	0.1168	0.1048	0.0412	0.1064		201829	rs13336632	C	0.1438	0.1347	0.0161	0.5364		201829	rs10518151	C	0.1067	0.08154	0.0322
202015	17	43475766	46122125		0.0206	0.048	0.03162	0.1065	0.481	0.3294		202015	rs10491182	C	0.08393	0.07594	0.048	0.1065		202015	rs7209072	G	0.06601	0.1037	0.0206	0.4765		202015	rs10491182	C	0.08021	0.08121	0.048	0.1065		202015	rs7209072	G	0.08333	0.06287	0.0206	0.4765		202015	rs10491183	T	0.08245	0.05814	0.0209
202170	16	75876072	77318571	ADAMTS18,ENSG00000260922	-0.015	-0.015	-0.015	0.4148	0.4148	0.4148		202170	rs1820253	C	0.2795	0.2627	-0.015	0.4148		202170	rs1820253	C	0.2486	0.2348	-0.015	0.4148		202170	rs1820253	C	0.2415	0.2588	-0.015	0.4148		202170	rs1820253	C	0.2808	0.2814	-0.015	0.4148		202170	rs1820253	C	0.2263	0.2536	-0.015
202259	5	101344757	101423727		-0.0259	-0.0171	-0.01972	0.1276	0.3121	0.25148		202259	rs3846608	T	0.308	0.3304	-0.0171	0.3121		202259	rs3846608	T	0.3287	0.314	-0.0171	0.3121		202259	rs13189343	A	0.3496	0.3085	-0.0214	0.1935		202259	rs3846608	T	0.3333	0.3102	-0.0171	0.3121		202259	rs11747250	C	0.3279	0.304	-0.0259
202434	7	85428427	85608916		0.0199	0.0261	0.02238	0.1076	0.2145	0.16226		202434	rs10235951	G	0.392	0.4058	0.0214	0.1741		202434	rs10235951	G	0.4298	0.3537	0.0214	0.1741		202434	rs10276025	T	0.3966	0.3733	0.0261	0.1076		202434	rs2373018	G	0.4178	0.4311	0.0231	0.141		202434	rs10261080	A	0.3865	0.4149	0.0199
202678	20	8239657	8291657	PLCB1	-0.0328	-0.0328	-0.0328	0.1069	0.1069	0.1069		202678	rs6133573	C	0.1723	0.1946	-0.0328	0.1069		202678	rs6133573	C	0.2275	0.2287	-0.0328	0.1069		202678	rs6133573	C	0.213	0.1994	-0.0328	0.1069		202678	rs6133573	C	0.226	0.1557	-0.0328	0.1069		202678	rs6133573	C	0.1895	0.2159	-0.0328
203550	1	202362310	204108163	ETNK2	-0.0389	-0.037	-0.03738	0.1393	0.1549	0.15178		203550	rs10900553	C	0.1304	0.1031	-0.037	0.1549		203550	rs10900553	C	0.111	0.09146	-0.037	0.1549		203550	rs3737659	A	0.08111	0.1152	-0.0389	0.1393		203550	rs10900553	C	0.1301	0.09337	-0.037	0.1549		203550	rs10900553	C	0.1037	0.1336	-0.037
203603	5	168855250	168922672		0.026	0.026	0.026	0.1075	0.1075	0.1075		203603	rs2546707	A	0.3768	0.3947	0.026	0.1075		203603	rs2546707	A	0.3961	0.3171	0.026	0.1075		203603	rs2546707	A	0.3973	0.3513	0.026	0.1075		203603	rs2546707	A	0.3562	0.3434	0.026	0.1075		203603	rs2546707	A	0.3683	0.4	0.026
203656	12	34004932	34131161		-0.0159	-0.0142	-0.01538	0.435	0.4824	0.44696		203656	rs10844762	C	0.1616	0.1802	-0.0142	0.4824		203656	rs814672	G	0.1634	0.1687	-0.0159	0.4474		203656	rs10844754	A	0.1818	0.1836	-0.0156	0.435		203656	rs10844754	A	0.1301	0.2108	-0.0156	0.435		203656	rs10844754	A	0.1649	0.1968	-0.0156
204068	2	18856508	18993027		0.0236	0.029	0.02468	0.1078	0.236	0.21036		204068	rs6531119	T	0.2036	0.1868	0.0236	0.236		204068	rs6531119	T	0.1896	0.2134	0.0236	0.236		204068	rs6531119	T	0.2071	0.1818	0.0236	0.236		204068	rs6531119	T	0.1918	0.1837	0.0236	0.236		204068	rs12614604	G	0.2198	0.2409	0.029
204976	7	144765997	145133150		-0.0379	-0.0351	-0.03566	0.1342	0.142	0.13576		204976	rs850390	A	0.1199	0.115	-0.0351	0.1342		204976	rs850390	A	0.1067	0.1524	-0.0351	0.1342		204976	rs850388	G	0.1321	0.1309	-0.0379	0.142		204976	rs850390	A	0.1164	0.1407	-0.0351	0.1342		204976	rs850390	A	0.1142	0.1349	-0.0351
205618	7	72625290	72977898		0.0245	0.0265	0.0261	0.1341	0.164	0.14008		205618	rs12539316	G	0.275	0.25	0.0265	0.1341		205618	rs12539316	G	0.2837	0.2561	0.0265	0.1341		205618	rs2286276	T	0.2736	0.2939	0.0245	0.164		205618	rs12539316	G	0.2778	0.3106	0.0265	0.1341		205618	rs12539316	G	0.3091	0.2445	0.0265
205692	17	49582892	52256225	ENSG00000285939	-0.0454	-0.0416	-0.04352	0.2088	0.265	0.22464		205692	rs12940669	T	0.04018	0.05876	-0.0454	0.2207		205692	rs9897174	T	0.05618	0.08642	-0.0436	0.2088		205692	rs2157768	C	0.04189	0.04551	-0.0416	0.265		205692	rs9897174	T	0.04167	0.06024	-0.0436	0.2088		205692	rs1457367	C	0.04531	0.05814	-0.0434
205871	1	36645252	36917301		-0.0308	-0.0211	-0.02418	0.1495	0.2886	0.23602		205871	rs12070076	C	0.2027	0.2184	-0.0211	0.2886		205871	rs16822823	G	0.191	0.247	-0.0268	0.1648		205871	rs12070076	C	0.2273	0.2345	-0.0211	0.2886		205871	rs12070076	C	0.2817	0.2256	-0.0211	0.2886		205871	rs11811387	T	0.1997	0.1848	-0.0308
205957	9	90961462	91800274	SHC3	0.0129	0.0309	0.01896	0.1132	0.4705	0.33452		205957	rs10867158	A	0.242	0.2123	0.0129	0.4705		205957	rs7037454	A	0.2051	0.253	0.0207	0.272		205957	rs10867158	A	0.2374	0.2287	0.0129	0.4705		205957	rs2873094	C	0.1781	0.2485	0.0174	0.3464		205957	rs1303776	G	0.2232	0.186	0.0309
206273	6	559353	614353	EXOC2	-0.0622	-0.0622	-0.0622	0.1551	0.1551	0.1551		206273	rs12530461	A	0.03661	0.0316	-0.0622	0.1551		206273	rs12530461	A	0.02247	0.04294	-0.0622	0.1551		206273	rs12530461	A	0.03476	0.03273	-0.0622	0.1551		206273	rs12530461	A	0.0411	0.02994	-0.0622	0.1551		206273	rs12530461	A	0.02804	0.04182	-0.0622
206475	8	81862346	82025924		-0.0286	-0.0274	-0.02812	0.1092	0.1247	0.1154		206475	rs895275	G	0.2777	0.2877	-0.0274	0.1247		206475	rs895275	G	0.2865	0.2927	-0.0274	0.1247		206475	rs10957993	T	0.2549	0.2958	-0.0286	0.1092		206475	rs10957993	T	0.3014	0.2681	-0.0286	0.1092		206475	rs10957993	T	0.265	0.3	-0.0286
206631	8	36486830	36605988	ENSG00000253363	0.0138	0.0249	0.02268	0.1321	0.4071	0.1871		206631	rs16885250	T	0.3152	0.3202	0.0249	0.1321		206631	rs2211743	G	0.3919	0.3323	0.0138	0.4071		206631	rs16885250	T	0.3011	0.3061	0.0249	0.1321		206631	rs16885250	T	0.3082	0.3102	0.0249	0.1321		206631	rs16885250	T	0.3326	0.3073	0.0249
206669	11	58285719	58529143	GLYAT	-0.0231	-0.0137	-0.0205	0.3125	0.5404	0.36968		206669	rs10896818	T	0.1127	0.1231	-0.0137	0.5404		206669	rs12417075	T	0.1531	0.1687	-0.0213	0.3415		206669	rs12417075	T	0.1477	0.172	-0.0213	0.3415		206669	rs11229578	A	0.1507	0.1677	-0.0231	0.3125		206669	rs11229578	A	0.1394	0.125	-0.0231
206896	1	243634383	245572552	KIF26B	-0.0279	-0.0126	-0.02082	0.1095	0.4715	0.25786		206896	rs496529	G	0.3455	0.3711	-0.0126	0.4715		206896	rs676292	A	0.361	0.3902	-0.0279	0.1095		206896	rs1768071	C	0.3414	0.3864	-0.0212	0.2361		206896	rs1768071	C	0.3699	0.3922	-0.0212	0.2361		206896	rs1768071	C	0.3655	0.3784	-0.0212
207107	5	82177857	82213613		-0.0106	-0.0106	-0.0106	0.6169	0.6169	0.6169		207107	rs4383715	A	0.15	0.1696	-0.0106	0.6169		207107	rs4383715	A	0.1404	0.1829	-0.0106	0.6169		207107	rs4383715	A	0.1622	0.157	-0.0106	0.6169		207107	rs4383715	A	0.1712	0.1467	-0.0106	0.6169		207107	rs4383715	A	0.1537	0.144	-0.0106
207210	21	22487062	23572795		-0.022	-0.0217	-0.02194	0.1694	0.1785	0.17122		207210	rs743432	G	0.3524	0.3725	-0.022	0.1694		207210	rs743432	G	0.3722	0.3902	-0.022	0.1694		207210	rs743432	G	0.3815	0.3829	-0.022	0.1694		207210	rs743432	G	0.3014	0.4521	-0.022	0.1694		207210	rs2827275	C	0.3574	0.3965	-0.0217
207228	1	234948326	236881784	ACTN2	0.0121	0.0174	0.01316	0.4965	0.6157	0.59186		207228	rs1366990	T	0.1295	0.1242	0.0121	0.6157		207228	rs1366990	T	0.1152	0.1463	0.0121	0.6157		207228	rs1366990	T	0.1319	0.1097	0.0121	0.6157		207228	rs1366990	T	0.1096	0.1084	0.0121	0.6157		207228	rs1366989	A	0.1119	0.09058	0.0174
208050	2	30596900	30863708	LCLAT1	-0.0225	-0.0104	-0.01448	0.3398	0.6667	0.55346		208050	rs10200589	A	0.1098	0.1264	-0.0104	0.6667		208050	rs17009601	G	0.1183	0.1341	-0.0187	0.4274		208050	rs10170012	A	0.115	0.1455	-0.0225	0.3398		208050	rs10200589	A	0.09589	0.1168	-0.0104	0.6667		208050	rs10200589	A	0.1326	0.1154	-0.0104
208328	14	96110332	97040579	PAPOLA,PAPOLA-DT	-0.0274	-0.0215	-0.02534	0.1763	0.2779	0.19842		208328	rs7160148	T	0.2107	0.23	-0.0274	0.1808		208328	rs7160148	T	0.2472	0.2256	-0.0274	0.1808		208328	rs12147439	G	0.2184	0.2261	-0.0252	0.1763		208328	rs12147439	G	0.2397	0.2216	-0.0252	0.1763		208328	rs11623142	C	0.212	0.2348	-0.0215
208684	15	74182486	76395431	TMEM266	0.0161	0.0161	0.0161	0.2935	0.2935	0.2935		208684	rs2221075	G	0.4679	0.4518	0.0161	0.2935		208684	rs2221075	G	0.4789	0.4238	0.0161	0.2935		208684	rs2221075	G	0.4893	0.4576	0.0161	0.2935		208684	rs2221075	G	0.4658	0.4731	0.0161	0.2935		208684	rs2221075	G	0.4699	0.466	0.0161
209359	1	242251131	244182973	LINC02774	0.0118	0.034	0.02956	0.111	0.5578	0.20036		209359	rs12041799	T	0.2045	0.2106	0.034	0.111		209359	rs12041799	T	0.2037	0.1951	0.034	0.111		209359	rs12131509	A	0.2148	0.1829	0.0118	0.5578		209359	rs12041799	T	0.1781	0.2006	0.034	0.111		209359	rs12041799	T	0.207	0.1847	0.034
209522	3	186477487	187962817	ENSG00000197099	-0.0292	-0.0233	-0.02448	0.1263	0.2133	0.1959		209522	rs822355	C	0.3152	0.364	-0.0233	0.2133		209522	rs822355	C	0.3539	0.3628	-0.0233	0.2133		209522	rs822355	C	0.3357	0.3448	-0.0233	0.2133		209522	rs822355	C	0.3425	0.3313	-0.0233	0.2133		209522	rs266738	C	0.3224	0.3577	-0.0292
209886	6	141087211	141156757	ENSG00000234147	0.0156	0.0212	0.01826	0.1796	0.35	0.26474		209886	rs594433	G	0.4143	0.3941	0.0212	0.1796		209886	rs985072	A	0.3511	0.3537	0.0179	0.2712		209886	rs1402509	T	0.3815	0.3853	0.0183	0.264		209886	rs988434	T	0.3562	0.3024	0.0156	0.35		209886	rs1521138	A	0.3516	0.325	0.0183
209929	10	99858257	100004441	R3HCC1L	0.0176	0.0271	0.02118	0.1113	0.2886	0.21716		209929	rs10450402	G	0.3652	0.3747	0.0181	0.2715		209929	rs10786395	C	0.3301	0.3659	0.0271	0.1113		209929	rs1334461	C	0.3839	0.3461	0.0254	0.1348		209929	rs10748715	C	0.3973	0.3832	0.0176	0.2886		209929	rs1048757	G	0.3523	0.3799	0.0177
209981	20	39935806	40502403		-0.0343	-0.0342	-0.03426	0.1169	0.1169	0.1169		209981	rs1543345	A	0.1375	0.1619	-0.0343	0.1169		209981	rs1543345	A	0.1419	0.2165	-0.0343	0.1169		209981	rs1543345	A	0.1429	0.1539	-0.0343	0.1169		209981	rs1543346	C	0.1507	0.1228	-0.0342	0.1169		209981	rs1543346	C	0.1412	0.1284	-0.0342
210238	4	109349464	109568913		-0.0146	-0.0146	-0.0146	0.3617	0.3617	0.3617		210238	rs1377065	G	0.3643	0.4108	-0.0146	0.3617		210238	rs1377065	G	0.4003	0.3902	-0.0146	0.3617		210238	rs1377065	G	0.3565	0.4061	-0.0146	0.3617		210238	rs1377065	G	0.3425	0.2982	-0.0146	0.3617		210238	rs1377065	G	0.3763	0.3739	-0.0146
210427	6	19066605	19175693		0.0062	0.0217	0.01416	0.3282	0.767	0.52604		210427	rs12530087	A	0.1616	0.1391	0.0145	0.5253		210427	rs2743005	T	0.1334	0.1524	0.0062	0.767		210427	rs1322532	A	0.1444	0.1467	0.015	0.4812		210427	rs763687	T	0.06164	0.1467	0.0134	0.5285		210427	rs12527801	T	0.1519	0.125	0.0217
210694	17	11150676	11209951	SHISA6	0.0212	0.0239	0.02326	0.1198	0.1819	0.13416		210694	rs2008491	G	0.4902	0.4424	0.0212	0.1819		210694	rs9894431	A	0.4986	0.4634	0.0234	0.1295		210694	rs1008362	A	0.4938	0.457	0.0239	0.1198		210694	rs1008362	A	0.4247	0.488	0.0239	0.1198		210694	rs1008362	A	0.4608	0.4612	0.0239
210902	1	167140723	168837734	ENSG00000285622	-0.0272	-0.0145	-0.02422	0.2026	0.4924	0.26534		210902	rs1322494	T	0.15	0.1729	-0.0272	0.2026		210902	rs1322494	T	0.1685	0.2012	-0.0272	0.2026		210902	rs2146204	C	0.1426	0.1576	-0.0145	0.4924		210902	rs1322494	T	0.1712	0.1737	-0.0272	0.2026		210902	rs12033844	G	0.1487	0.1739	-0.025
210980	8	19506410	19556817	CSGALNACT1	0.0196	0.0261	0.0248	0.1119	0.2105	0.13162		210980	rs4922073	C	0.4429	0.4157	0.0261	0.1119		210980	rs4922073	C	0.4073	0.4146	0.0261	0.1119		210980	rs4922078	A	0.4599	0.4285	0.0196	0.2105		210980	rs4922073	C	0.3836	0.4337	0.0261	0.1119		210980	rs4922073	C	0.441	0.4302	0.0261
211026	13	69899308	71001307		0.0242	0.0265	0.02466	0.1452	0.1911	0.18192		211026	rs17087132	G	0.2545	0.2375	0.0242	0.1911		211026	rs4605034	G	0.2921	0.2348	0.0265	0.1452		211026	rs17087132	G	0.2504	0.2701	0.0242	0.1911		211026	rs17087132	G	0.2534	0.259	0.0242	0.1911		211026	rs17087132	G	0.2471	0.2419	0.0242
211088	2	75844553	75991045		-0.0319	-0.029	-0.03132	0.1242	0.1641	0.13218		211088	rs2422237	A	0.1527	0.1674	-0.029	0.1641		211088	rs7419897	G	0.1826	0.2012	-0.0319	0.1242		211088	rs7419897	G	0.1604	0.1733	-0.0319	0.1242		211088	rs7419897	G	0.1438	0.1916	-0.0319	0.1242		211088	rs7419897	G	0.1556	0.1885	-0.0319
211135	6	99721049	99827724	FAXC	0.0248	0.0254	0.02528	0.112	0.1181	0.11322		211135	rs1045728	G	0.4732	0.4468	0.0254	0.112		211135	rs1045728	G	0.4916	0.5	0.0254	0.112		211135	rs1045731	C	0.4911	0.4848	0.0248	0.1181		211135	rs1045728	G	0.4795	0.494	0.0254	0.112		211135	rs1045728	G	0.4968	0.4552	0.0254
211485	5	62069673	62119952		-0.0223	-0.0163	-0.0175	0.2021	0.2965	0.27762		211485	rs185170	G	0.4071	0.3925	-0.0163	0.2965		211485	rs2642776	G	0.382	0.378	-0.0223	0.2021		211485	rs185170	G	0.3752	0.4303	-0.0163	0.2965		211485	rs185170	G	0.411	0.3623	-0.0163	0.2965		211485	rs185170	G	0.4005	0.4338	-0.0163
211526	10	4138683	4157839		-0.0261	-0.0149	-0.01774	0.1122	0.3455	0.28148		211526	rs10795132	C	0.4143	0.444	-0.0261	0.1122		211526	rs10904182	T	0.4087	0.4268	-0.0149	0.3455		211526	rs4881291	G	0.392	0.443	-0.0179	0.2587		211526	rs10904182	T	0.3699	0.4581	-0.0149	0.3455		211526	rs10904182	T	0.4158	0.4329	-0.0149
211589	20	35838121	36404707	CTNNBL1	0.0205	0.0217	0.02138	0.1752	0.2039	0.18446		211589	rs238300	G	0.3705	0.3381	0.0217	0.1752		211589	rs6091103	G	0.3638	0.3567	0.0215	0.184		211589	rs238300	G	0.3895	0.3703	0.0217	0.1752		211589	rs6091103	G	0.3699	0.3862	0.0215	0.184		211589	rs6020339	C	0.4032	0.3497	0.0205
211939	3	55284640	55306395	LINC02030	0.0174	0.0258	0.02412	0.1125	0.2878	0.14756		211939	rs458308	C	0.347	0.3293	0.0258	0.1125		211939	rs458308	C	0.3343	0.3079	0.0258	0.1125		211939	rs7649746	G	0.3235	0.3194	0.0174	0.2878		211939	rs458308	C	0.3699	0.3413	0.0258	0.1125		211939	rs458308	C	0.3474	0.3166	0.0258
211945	3	161825807	163314917		-0.0246	-0.0165	-0.02112	0.1176	0.3166	0.1998		211945	rs13063743	G	0.4196	0.4056	-0.024	0.1241		211945	rs13063743	G	0.4101	0.3902	-0.024	0.1241		211945	rs4856766	C	0.3854	0.4194	-0.0165	0.3166		211945	rs4856766	C	0.4247	0.4162	-0.0165	0.3166		211945	rs4856764	G	0.3895	0.4173	-0.0246
212000	8	17599136	17644312	MTUS1	0.0131	0.0185	0.01664	0.3484	0.4975	0.4		212000	rs2937885	G	0.1946	0.1746	0.0131	0.4975		212000	rs2979784	C	0.2219	0.186	0.0146	0.4573		212000	rs2904738	A	0.1711	0.196	0.0185	0.3484		212000	rs2904738	A	0.1918	0.2048	0.0185	0.3484		212000	rs2904738	A	0.1778	0.1613	0.0185
212041	13	66448302	67542554	PCDH9	0.0207	0.0301	0.02694	0.1125	0.2932	0.17426		212041	rs7987478	A	0.217	0.1885	0.0301	0.1125		212041	rs7987478	A	0.2528	0.2104	0.0301	0.1125		212041	rs1323923	T	0.1884	0.1867	0.0237	0.2406		212041	rs7987478	A	0.1901	0.2152	0.0301	0.1125		212041	rs1323917	C	0.186	0.2124	0.0207
212048	14	73136565	74066812	ENSG00000258603	-0.0241	-0.0241	-0.0241	0.3978	0.3978	0.3978		212048	rs6574129	T	0.07321	0.08315	-0.0241	0.3978		212048	rs6574129	T	0.07444	0.07317	-0.0241	0.3978		212048	rs6574129	T	0.08111	0.07455	-0.0241	0.3978		212048	rs6574129	T	0.06849	0.07317	-0.0241	0.3978		212048	rs6574129	T	0.07553	0.09239	-0.0241
212307	5	120853669	120881568		0.0151	0.0152	0.01518	0.4701	0.4873	0.48386		212307	rs17147959	C	0.1741	0.1491	0.0152	0.4873		212307	rs17147959	C	0.1376	0.1616	0.0152	0.4873		212307	rs17147959	C	0.1774	0.1461	0.0152	0.4873		212307	rs17147959	C	0.1338	0.1768	0.0152	0.4873		212307	rs9327198	A	0.1774	0.1577	0.0151
212373	13	68487242	69599336		-0.0192	-0.0187	-0.019	0.2371	0.2463	0.24078		212373	rs9599380	T	0.3795	0.4041	-0.0187	0.2463		212373	rs9599380	T	0.4382	0.3994	-0.0187	0.2463		212373	rs2325219	C	0.4205	0.4217	-0.0192	0.2371		212373	rs2325219	C	0.4452	0.4461	-0.0192	0.2371		212373	rs2325219	C	0.3861	0.4125	-0.0192
212765	4	96917785	97137318		-0.0254	-0.0231	-0.02494	0.1435	0.1848	0.15176		212765	rs6855600	A	0.2696	0.2847	-0.0254	0.1435		212765	rs6855600	A	0.2907	0.2591	-0.0254	0.1435		212765	rs6855600	A	0.2656	0.2582	-0.0254	0.1435		212765	rs6855600	A	0.2847	0.2814	-0.0254	0.1435		212765	rs6854649	C	0.2415	0.2778	-0.0231
212816	9	24124420	24133646		-0.0301	-0.023	-0.02742	0.113	0.2458	0.16292		212816	rs10966238	A	0.2134	0.2367	-0.0301	0.113		212816	rs7848340	C	0.2303	0.2165	-0.0238	0.2298		212816	rs10966239	T	0.1765	0.2018	-0.023	0.2458		212816	rs10966238	A	0.2466	0.2126	-0.0301	0.113		212816	rs10966238	A	0.2221	0.2213	-0.0301
212880	22	20854651	22526062		0.0254	0.0314	0.0278	0.113	0.2128	0.17288		212880	rs5750648	A	0.1607	0.1859	0.0314	0.113		212880	rs5750648	A	0.1601	0.1982	0.0314	0.113		212880	rs5757186	T	0.2209	0.1819	0.0254	0.2128		212880	rs5757186	T	0.2708	0.1646	0.0254	0.2128		212880	rs5757186	T	0.1851	0.1817	0.0254
212889	1	70968126	71210152	LINC01788	-0.021	-0.0206	-0.02092	0.1767	0.2023	0.18182		212889	rs2421787	G	0.4	0.4313	-0.021	0.1767		212889	rs2421787	G	0.441	0.4421	-0.021	0.1767		212889	rs2421787	G	0.4278	0.4295	-0.021	0.1767		212889	rs2421787	G	0.4795	0.4521	-0.021	0.1767		212889	rs1932051	T	0.41	0.4374	-0.0206
212935	4	37986008	38309613		-0.0317	-0.029	-0.03062	0.1131	0.1668	0.13458		212935	rs991331	T	0.1661	0.1853	-0.029	0.1668		212935	rs991331	T	0.1868	0.1829	-0.029	0.1668		212935	rs1487628	A	0.1696	0.1952	-0.0317	0.1131		212935	rs1487628	A	0.1781	0.1617	-0.0317	0.1131		212935	rs1487628	A	0.1779	0.1688	-0.0317
213076	2	176480515	176772269		0.0254	0.0254	0.0254	0.1132	0.1132	0.1132		213076	rs2884888	A	0.3652	0.3492	0.0254	0.1132		213076	rs2884888	A	0.3722	0.378	0.0254	0.1132		213076	rs2884888	A	0.3387	0.3624	0.0254	0.1132		213076	rs2884888	A	0.2808	0.3533	0.0254	0.1132		213076	rs2884888	A	0.377	0.3445	0.0254
213185	12	105292106	106907303	POLR3B	-0.0152	-0.0006	-0.00646	0.4019	0.9717	0.73126		213185	rs10861607	C	0.2482	0.2772	-0.0098	0.5924		213185	rs2288266	G	0.2711	0.2774	-0.0029	0.8664		213185	rs2243506	C	0.2362	0.2339	-0.0152	0.4019		213185	rs13561	C	0.2534	0.2725	-0.0038	0.8239		213185	rs10778484	C	0.2964	0.2667	-0.0006
213318	9	30008156	30029776		0.016	0.0211	0.01838	0.1748	0.3172	0.24532		213318	rs2813932	A	0.4509	0.4162	0.0194	0.2087		213318	rs2813932	A	0.4719	0.4116	0.0194	0.2087		213318	rs1986466	T	0.4695	0.4525	0.016	0.3172		213318	rs1986466	T	0.5	0.4729	0.016	0.3172		213318	rs10757933	T	0.4711	0.44	0.0211
213363	16	50764161	52213504		0.0144	0.0161	0.01576	0.3588	0.4172	0.37048		213363	rs10521256	A	0.2679	0.245	0.0161	0.3588		213363	rs10521256	A	0.2654	0.2988	0.0161	0.3588		213363	rs10521256	A	0.2531	0.2558	0.0161	0.3588		213363	rs10521256	A	0.3014	0.2892	0.0161	0.3588		213363	rs8061839	G	0.2497	0.2737	0.0144
213526	15	27509413	29727598	FAM189A1	0.0228	0.0257	0.02396	0.1136	0.1664	0.14528		213526	rs7171910	T	0.3679	0.3936	0.0257	0.1136		213526	rs7171910	T	0.3806	0.2774	0.0257	0.1136		213526	rs10851926	T	0.4091	0.363	0.0228	0.1664		213526	rs10851926	T	0.3562	0.3743	0.0228	0.1664		213526	rs10851926	T	0.3792	0.364	0.0228
214013	9	29903903	29924682		0.0223	0.0253	0.0241	0.1163	0.1658	0.1361		214013	rs6476171	G	0.3705	0.3492	0.0223	0.1658		214013	rs6476171	G	0.3539	0.3384	0.0223	0.1658		214013	rs2502101	A	0.3485	0.3394	0.0253	0.1163		214013	rs2502101	A	0.3356	0.3593	0.0253	0.1163		214013	rs2502101	A	0.3755	0.339	0.0253
214265	2	10939300	11021849	LINC01954	0.0386	0.0386	0.0386	0.1287	0.1287	0.1287		214265	rs4669639	T	0.1268	0.1103	0.0386	0.1287		214265	rs4669639	T	0.09972	0.1311	0.0386	0.1287		214265	rs4669639	T	0.09537	0.1212	0.0386	0.1287		214265	rs4669639	T	0.1301	0.0988	0.0386	0.1287		214265	rs4669639	T	0.1349	0.1131	0.0386
214423	1	191177389	192947351	ENSG00000285280	-0.0365	-0.027	-0.02954	0.1321	0.2605	0.2306		214423	rs10801165	C	0.1036	0.1258	-0.0279	0.2586		214423	rs7512241	A	0.1138	0.1433	-0.0365	0.1321		214423	rs10801165	C	0.1025	0.1248	-0.0279	0.2586		214423	rs710140	A	0.137	0.1145	-0.027	0.2605		214423	rs6428143	G	0.1105	0.1145	-0.0284
214518	9	91090376	91900556		0.0226	0.0362	0.02532	0.1423	0.3468	0.3059		214518	rs1980888	A	0.1134	0.09822	0.0226	0.3468		214518	rs1980888	A	0.09831	0.1494	0.0226	0.3468		214518	rs1980888	A	0.1248	0.1188	0.0226	0.3468		214518	rs1980888	A	0.08904	0.1557	0.0226	0.3468		214518	rs10867160	C	0.1309	0.11	0.0362
214578	22	25893775	27565958		0.0221	0.0257	0.02282	0.114	0.1632	0.15336		214578	rs760523	C	0.4304	0.4062	0.0221	0.1632		214578	rs760523	C	0.3778	0.4268	0.0221	0.1632		214578	rs1519222	C	0.4029	0.3893	0.0257	0.114		214578	rs760523	C	0.4726	0.4072	0.0221	0.1632		214578	rs760523	C	0.4516	0.3996	0.0221
214754	1	151582633	153316144	PGLYRP4	0.0173	0.0308	0.02762	0.1557	0.4323	0.21744		214754	rs2570440	T	0.1601	0.1436	0.0173	0.4323		214754	rs3006448	C	0.1503	0.189	0.0291	0.1813		214754	rs2196081	G	0.1628	0.1232	0.0308	0.1557		214754	rs2196081	G	0.08904	0.1235	0.0308	0.1557		214754	rs2196080	G	0.1517	0.1631	0.0301
214767	2	145016414	145299944	LINC01412	0.0271	0.0306	0.02926	0.1274	0.1806	0.14616		214767	rs16823835	G	0.2214	0.1735	0.029	0.1477		214767	rs16823835	G	0.1812	0.1707	0.029	0.1477		214767	rs16823846	T	0.183	0.1933	0.0306	0.1274		214767	rs16823846	T	0.137	0.1587	0.0306	0.1274		214767	rs13034331	T	0.1958	0.1726	0.0271
215122	2	30738767	30889161		-0.0265	-0.02	-0.02144	0.1666	0.321	0.28606		215122	rs1901906	A	0.1741	0.194	-0.02	0.321		215122	rs1901909	G	0.2261	0.186	-0.0265	0.1666		215122	rs2602772	A	0.1616	0.1958	-0.0207	0.3007		215122	rs1901906	A	0.1438	0.1777	-0.02	0.321		215122	rs1901906	A	0.1683	0.1673	-0.02
215241	15	41893916	44151063		-0.0383	-0.0277	-0.03326	0.1531	0.2971	0.21044		215241	rs10438303	C	0.08661	0.1025	-0.0383	0.1531		215241	rs10438303	C	0.1166	0.1098	-0.0383	0.1531		215241	rs3736180	G	0.08913	0.1103	-0.0295	0.2487		215241	rs2467402	A	0.1056	0.09568	-0.0325	0.2002		215241	rs13329084	A	0.08443	0.1023	-0.0277
215571	16	7231128	7291028	RBFOX1	-0.0255	-0.0209	-0.02212	0.1146	0.1893	0.16806		215571	rs2881440	A	0.353	0.369	-0.0214	0.1788		215571	rs2881440	A	0.4031	0.3598	-0.0214	0.1788		215571	rs2346617	A	0.3378	0.3727	-0.0209	0.1893		215571	rs2881440	A	0.3493	0.3772	-0.0214	0.1788		215571	rs2346615	A	0.3672	0.3418	-0.0255
215875	12	21273609	21382342	SLCO1B1	0.0078	0.0087	0.00834	0.5979	0.6321	0.61158		215875	rs10841763	C	0.3562	0.372	0.0087	0.5979		215875	rs10841763	C	0.3357	0.3262	0.0087	0.5979		215875	rs10841763	C	0.3868	0.3424	0.0087	0.5979		215875	rs4149076	C	0.3836	0.3683	0.0078	0.6321		215875	rs4149076	C	0.348	0.3541	0.0078
215895	15	71893670	74107417		0.0222	0.0248	0.02284	0.1818	0.2313	0.22098		215895	rs874955	C	0.2446	0.2295	0.0224	0.2306		215895	rs896588	A	0.2149	0.2012	0.0222	0.2313		215895	rs874955	C	0.2344	0.2345	0.0224	0.2306		215895	rs874955	C	0.226	0.2186	0.0224	0.2306		215895	rs16958307	A	0.2529	0.2231	0.0248
216466	4	73295961	73552915	ADAMTS3	0.0159	0.0201	0.0183	0.2368	0.3446	0.2848		216466	rs10024063	G	0.3429	0.3221	0.0195	0.2368		216466	rs1383930	G	0.3371	0.3171	0.0159	0.3446		216466	rs1383930	G	0.3467	0.3485	0.0159	0.3446		216466	rs11727604	T	0.2708	0.3636	0.0201	0.249		216466	rs11727604	T	0.3172	0.2814	0.0201
216509	8	141410497	141443490	TRAPPC9	0.0139	0.017	0.01452	0.2868	0.3852	0.36552		216509	rs11778051	C	0.4259	0.4374	0.0139	0.3852		216509	rs11778051	C	0.4101	0.439	0.0139	0.3852		216509	rs872051	G	0.4509	0.4089	0.017	0.2868		216509	rs11778051	C	0.3542	0.4277	0.0139	0.3852		216509	rs11778051	C	0.449	0.3951	0.0139
216514	9	71672662	72492959	C9orf135	0.0098	0.0193	0.01302	0.233	0.5393	0.4229		216514	rs10868224	T	0.4098	0.3908	0.0114	0.4708		216514	rs766003	G	0.4143	0.3902	0.0124	0.4313		216514	rs10780684	G	0.4242	0.4009	0.0122	0.4401		216514	rs10780686	A	0.3973	0.3683	0.0193	0.233		216514	rs10780685	C	0.4357	0.3916	0.0098
216674	9	86956096	87766276		-0.0245	-0.0245	-0.0245	0.1153	0.1153	0.1153		216674	rs6559849	G	0.4036	0.4317	-0.0245	0.1153		216674	rs6559849	G	0.4115	0.3994	-0.0245	0.1153		216674	rs6559849	G	0.4269	0.4199	-0.0245	0.1153		216674	rs6559849	G	0.3904	0.4551	-0.0245	0.1153		216674	rs6559849	G	0.3977	0.4315	-0.0245
216856	13	99545567	100763790	PCCA	-0.0211	-0.0155	-0.01782	0.2472	0.3743	0.322		216856	rs4483714	T	0.2388	0.2478	-0.0185	0.3071		216856	rs4483714	T	0.2683	0.2744	-0.0185	0.3071		216856	rs9557378	A	0.2487	0.2797	-0.0155	0.3743		216856	rs9557378	A	0.2808	0.2904	-0.0155	0.3743		216856	rs4772265	C	0.2579	0.2882	-0.0211
217600	19	28731835	33428164		0.018	0.0186	0.0184	0.2672	0.2981	0.27486		217600	rs10427067	C	0.3268	0.308	0.0186	0.2672		217600	rs10427067	C	0.2795	0.3201	0.0186	0.2672		217600	rs1840815	G	0.3134	0.3086	0.0184	0.2709		217600	rs1840815	G	0.2877	0.2784	0.0184	0.2709		217600	rs10406156	T	0.3242	0.2979	0.018
217865	9	29943652	29959547		0.0218	0.0252	0.02408	0.116	0.177	0.13496		217865	rs10813205	C	0.4714	0.4584	0.023	0.1498		217865	rs10969475	T	0.4718	0.4268	0.0218	0.177		217865	rs10738831	C	0.4938	0.4606	0.0252	0.116		217865	rs10738831	C	0.4726	0.4818	0.0252	0.116		217865	rs10738831	C	0.485	0.4458	0.0252
217904	13	107332783	108534782	ENSG00000286343	-0.0287	-0.0264	-0.02824	0.116	0.1415	0.1211		217904	rs2136267	T	0.2562	0.2866	-0.0287	0.116		217904	rs2136267	T	0.2388	0.3049	-0.0287	0.116		217904	rs2136267	T	0.2558	0.2776	-0.0287	0.116		217904	rs2136267	T	0.2329	0.2725	-0.0287	0.116		217904	rs11619968	C	0.2587	0.2806	-0.0264
218309	2	158797526	159089280	CCDC148,CCDC148-AS1	0.0242	0.0265	0.02512	0.1721	0.22	0.20084		218309	rs10192799	T	0.1839	0.1973	0.0242	0.22		218309	rs10192799	T	0.1699	0.186	0.0242	0.22		218309	rs10192799	T	0.2094	0.1842	0.0242	0.22		218309	rs4664932	T	0.1644	0.2275	0.0265	0.1721		218309	rs4664932	T	0.2147	0.212	0.0265
218854	3	179490367	180973061	USP13,PEX5L	-0.0315	-0.0264	-0.02844	0.1166	0.1919	0.16178		218854	rs1442495	T	0.2018	0.184	-0.0264	0.1919		218854	rs2284884	T	0.1826	0.181	-0.0315	0.1166		218854	rs2284884	T	0.1631	0.2018	-0.0315	0.1166		218854	rs1442495	T	0.2192	0.2006	-0.0264	0.1919		218854	rs1442495	T	0.1824	0.2111	-0.0264
219047	6	163584802	163664812	PACRG	-0.0268	-0.0223	-0.0241	0.1931	0.2768	0.24332		219047	rs6908925	G	0.1661	0.1846	-0.0268	0.1931		219047	rs6908925	G	0.1503	0.1494	-0.0268	0.1931		219047	rs6904305	G	0.1554	0.1715	-0.0223	0.2768		219047	rs6904305	G	0.1781	0.2139	-0.0223	0.2768		219047	rs6904305	G	0.1588	0.1864	-0.0223
219123	15	94018130	96218175	ENSG00000275016	-0.0444	-0.041	-0.04168	0.1664	0.1908	0.17128		219123	rs16975518	C	0.09464	0.08481	-0.041	0.1664		219123	rs16975518	C	0.0941	0.07622	-0.041	0.1664		219123	rs16975518	C	0.06417	0.07758	-0.041	0.1664		219123	rs16975518	C	0.08219	0.08383	-0.041	0.1664		219123	rs12595226	A	0.07197	0.05748	-0.0444
219349	1	111443554	111642031		0.0128	0.025	0.0187	0.1536	0.4925	0.32492		219349	rs11102199	A	0.271	0.2494	0.0179	0.3324		219349	rs11102212	G	0.2767	0.2226	0.025	0.1536		219349	rs11102212	G	0.2843	0.2636	0.025	0.1536		219349	rs1282333	T	0.2466	0.247	0.0128	0.4925		219349	rs1282333	T	0.2684	0.2746	0.0128
219352	1	168440419	170173795	LINC01681	0.0227	0.0228	0.02274	0.203	0.2085	0.2063		219352	rs12043515	C	0.3027	0.2794	0.0228	0.203		219352	rs12043515	C	0.2725	0.2805	0.0228	0.203		219352	rs12027224	T	0.328	0.285	0.0227	0.2085		219352	rs12027224	T	0.3082	0.2964	0.0227	0.2085		219352	rs12027224	T	0.2874	0.2755	0.0227
219571	7	62215205	62656497		-0.0238	-0.022	-0.02308	0.1679	0.2219	0.19352		219571	rs4718878	T	0.2795	0.3054	-0.022	0.2219		219571	rs4718878	T	0.264	0.2988	-0.022	0.2219		219571	rs6956675	A	0.2469	0.304	-0.0238	0.1679		219571	rs6956675	A	0.3699	0.2879	-0.0238	0.1679		219571	rs10266439	C	0.2935	0.2955	-0.0238
219766	11	130487858	130987730		0.022	0.0271	0.02608	0.1171	0.1858	0.13084		219766	rs11222474	G	0.3943	0.3714	0.0271	0.1171		219766	rs11222474	G	0.4045	0.3994	0.0271	0.1171		219766	rs7101509	G	0.4135	0.3697	0.022	0.1858		219766	rs11222474	G	0.3562	0.4157	0.0271	0.1171		219766	rs11222474	G	0.3918	0.3859	0.0271
220071	8	1885064	1897657	ARHGEF10,KBTBD11-OT1	0.0275	0.0275	0.0275	0.1969	0.1969	0.1969		220071	rs2280823	G	0.1545	0.122	0.0275	0.1969		220071	rs2280823	G	0.1756	0.1402	0.0275	0.1969		220071	rs2280823	G	0.1417	0.1533	0.0275	0.1969		220071	rs2280823	G	0.1575	0.1647	0.0275	0.1969		220071	rs2280823	G	0.157	0.1369	0.0275
220092	10	27913243	27960583		-0.0234	-0.0182	-0.0211	0.1415	0.2421	0.18328		220092	rs1168579	G	0.4661	0.4839	-0.0234	0.1415		220092	rs1168579	G	0.4902	0.4482	-0.0234	0.1415		220092	rs1168584	A	0.4127	0.457	-0.0223	0.1492		220092	rs1687721	T	0.4863	0.4371	-0.0182	0.2421		220092	rs1687721	T	0.4265	0.456	-0.0182
220388	3	106314325	107809797		0.0208	0.0253	0.0244	0.1523	0.2353	0.1689		220388	rs2590187	A	0.2723	0.2583	0.0253	0.1523		220388	rs2590210	C	0.2879	0.2774	0.0208	0.2353		220388	rs2590187	A	0.2932	0.2424	0.0253	0.1523		220388	rs2590187	A	0.2808	0.2455	0.0253	0.1523		220388	rs2590187	A	0.2685	0.2697	0.0253
220453	9	10301000	10317212	PTPRD	-0.031	-0.0141	-0.0192	0.1175	0.4896	0.3563		220453	rs589991	T	0.1696	0.1892	-0.0141	0.4896		220453	rs605318	A	0.1643	0.2195	-0.0184	0.3424		220453	rs605318	A	0.2201	0.1964	-0.0184	0.3424		220453	rs603924	C	0.1875	0.216	-0.031	0.1175		220453	rs589991	T	0.1112	0.1159	-0.0141
221214	1	186679368	188456430		-0.0363	-0.0339	-0.03534	0.1762	0.2024	0.18668		221214	rs1489267	A	0.09643	0.1182	-0.0339	0.2024		221214	rs1489267	A	0.0941	0.05793	-0.0339	0.2024		221214	rs12405943	G	0.09626	0.09636	-0.0363	0.1762		221214	rs12405943	G	0.07746	0.08383	-0.0363	0.1762		221214	rs12405943	G	0.07923	0.09615	-0.0363
221420	5	168946879	169031218	SPDL1	0.0059	0.0228	0.01916	0.1798	0.7435	0.29712		221420	rs2042248	G	0.3045	0.3259	0.0228	0.1814		221420	rs3797713	T	0.3202	0.2805	0.0228	0.1798		221420	rs255824	C	0.2816	0.2397	0.0059	0.7435		221420	rs3797713	T	0.2945	0.2874	0.0228	0.1798		221420	rs154034	C	0.2884	0.3175	0.0215
221689	19	38321638	43012379	WDR87BP,ENSG00000267640	-0.0145	-0.0115	-0.0121	0.4792	0.5632	0.5464		221689	rs10402530	T	0.1708	0.1951	-0.0115	0.5632		221689	rs10402530	T	0.1615	0.2073	-0.0115	0.5632		221689	rs10420891	G	0.1889	0.1891	-0.0145	0.4792		221689	rs10402530	T	0.137	0.1916	-0.0115	0.5632		221689	rs10402530	T	0.1893	0.1825	-0.0115
221851	15	84456879	86655875	LINC01584,AGBL1	0.0203	0.0217	0.02086	0.2691	0.2827	0.27726		221851	rs7180828	A	0.2179	0.1962	0.0217	0.2691		221851	rs7180828	A	0.1952	0.2104	0.0217	0.2691		221851	rs8027956	C	0.1961	0.2085	0.0203	0.2827		221851	rs8027956	C	0.226	0.2305	0.0203	0.2827		221851	rs8027956	C	0.2145	0.1825	0.0203
221880	20	46014041	46616578	LINC01522	-0.0249	-0.0223	-0.02386	0.1183	0.1578	0.1341		221880	rs8116086	T	0.4464	0.4789	-0.0223	0.1578		221880	rs8116086	T	0.4522	0.4817	-0.0223	0.1578		221880	rs2664588	T	0.4412	0.4491	-0.0249	0.1183		221880	rs2664588	T	0.4653	0.4581	-0.0249	0.1183		221880	rs2664588	T	0.4336	0.4594	-0.0249
221967	7	144993498	145370362		-0.0097	-0.0012	-0.0077	0.5781	0.9474	0.66182		221967	rs6952652	A	0.2786	0.2977	-0.0097	0.5781		221967	rs6952652	A	0.2865	0.3293	-0.0097	0.5781		221967	rs12535408	G	0.2755	0.2745	-0.0094	0.5836		221967	rs2888244	C	0.3356	0.2667	-0.0012	0.9474		221967	rs10952627	T	0.3018	0.2719	-0.0085
222186	16	25802490	25894989	HS3ST4,ENSG00000285882	-0.0242	-0.019	-0.02004	0.1653	0.2887	0.26402		222186	rs4787777	T	0.2777	0.2749	-0.019	0.2887		222186	rs4787777	T	0.257	0.3354	-0.019	0.2887		222186	rs4787777	T	0.2629	0.2842	-0.019	0.2887		222186	rs4787777	T	0.2397	0.2814	-0.019	0.2887		222186	rs4407062	G	0.3093	0.2692	-0.0242
222204	22	25289826	26959826	TPST2	-0.0274	-0.017	-0.02324	0.1185	0.3282	0.20238		222204	rs4820685	A	0.2482	0.2783	-0.017	0.3282		222204	rs4820685	A	0.2992	0.2622	-0.017	0.3282		222204	rs2283831	A	0.2291	0.2673	-0.0274	0.1185		222204	rs2283831	A	0.2466	0.2287	-0.0274	0.1185		222204	rs2283831	A	0.2946	0.2719	-0.0274
222284	8	83636018	83828161	ENSG00000254394	0.0176	0.0253	0.02242	0.1186	0.2568	0.1672		222284	rs1404768	G	0.467	0.4651	0.0199	0.2054		222284	rs2177732	A	0.4916	0.4207	0.0253	0.1186		222284	rs4498534	G	0.4857	0.4654	0.0176	0.2568		222284	rs2177732	A	0.4167	0.4509	0.0253	0.1186		222284	rs13277449	T	0.4889	0.4595	0.024
223780	8	39192481	39558078		-0.0244	-0.0133	-0.01996	0.1195	0.3931	0.22894		223780	rs11985201	A	0.408	0.4418	-0.0133	0.3931		223780	rs13252535	G	0.4059	0.4299	-0.0244	0.1195		223780	rs11985201	A	0.4196	0.4491	-0.0133	0.3931		223780	rs13252535	G	0.2534	0.4273	-0.0244	0.1195		223780	rs13252535	G	0.4332	0.398	-0.0244
223910	3	117618668	119221071	ENSG00000243276	0.0088	0.0142	0.01048	0.4182	0.6239	0.54558		223910	rs10049077	A	0.2612	0.2903	0.0088	0.6239		223910	rs6791432	A	0.3062	0.25	0.0097	0.5592		223910	rs12635844	T	0.2843	0.2972	0.01	0.5674		223910	rs6791432	A	0.2746	0.2957	0.0097	0.5592		223910	rs10934433	C	0.3025	0.2824	0.0142
224520	18	71703391	73580198	ENSG00000266460	0.0192	0.0211	0.01964	0.1736	0.2106	0.20268		224520	rs17326246	A	0.4705	0.4895	0.0211	0.1736		224520	rs7241677	A	0.4677	0.4939	0.0192	0.2106		224520	rs7241677	A	0.4733	0.4836	0.0192	0.2106		224520	rs7241677	A	0.4861	0.4639	0.0192	0.2106		224520	rs7237517	T	0.4815	0.4908	0.0195
224610	6	87094486	87151205		-0.0334	-0.0334	-0.0334	0.1398	0.1398	0.1398		224610	rs12193553	T	0.1554	0.153	-0.0334	0.1398		224610	rs12193553	T	0.125	0.1799	-0.0334	0.1398		224610	rs12193553	T	0.125	0.1408	-0.0334	0.1398		224610	rs12193553	T	0.1944	0.1476	-0.0334	0.1398		224610	rs12193553	T	0.1363	0.1628	-0.0334
224736	1	223572917	225528665	DNAH14	0.0413	0.0464	0.04436	0.1201	0.1695	0.13986		224736	rs10495237	G	0.07946	0.0582	0.0413	0.1695		224736	rs12728785	A	0.05197	0.05521	0.0464	0.1201		224736	rs10495237	G	0.08467	0.06667	0.0413	0.1695		224736	rs12728785	A	0.06164	0.08383	0.0464	0.1201		224736	rs12728785	A	0.07158	0.06351	0.0464
224823	10	110208251	110270329		0.0228	0.0249	0.02382	0.1463	0.1726	0.1575		224823	rs1332270	T	0.3071	0.2838	0.0238	0.1562		224823	rs1332270	T	0.2795	0.2744	0.0238	0.1562		224823	rs10509873	T	0.3333	0.3155	0.0249	0.1463		224823	rs1332270	T	0.3071	0.2974	0.0238	0.1562		224823	rs1329504	T	0.3263	0.2917	0.0228
224841	12	73284264	75014962		-0.0239	-0.0213	-0.02246	0.2504	0.3047	0.28034		224841	rs17113938	T	0.1732	0.1874	-0.0216	0.2981		224841	rs2172600	C	0.1427	0.1728	-0.0213	0.3047		224841	rs17113938	T	0.1845	0.182	-0.0216	0.2981		224841	rs1972018	T	0.2192	0.1333	-0.0239	0.2504		224841	rs1972018	T	0.1746	0.1995	-0.0239
225559	3	21037588	21099489	SGO1-AS1,ENSG00000282987	-0.0214	-0.0097	-0.01732	0.1818	0.553	0.30362		225559	rs1497516	C	0.3462	0.3736	-0.0185	0.2611		225559	rs7652147	G	0.3862	0.3902	-0.0214	0.1818		225559	rs4306882	G	0.398	0.3636	-0.0097	0.553		225559	rs1497516	C	0.4247	0.3473	-0.0185	0.2611		225559	rs1497516	C	0.3693	0.4216	-0.0185
225712	1	75904658	76210289	ACADM,DLSTP1	-0.0234	-0.0216	-0.02218	0.1857	0.2165	0.20434		225712	rs11161510	T	0.2786	0.2949	-0.0216	0.2165		225712	rs211718	T	0.3104	0.3018	-0.0234	0.1865		225712	rs11163924	A	0.2602	0.3133	-0.0227	0.1857		225712	rs11161510	T	0.3767	0.3323	-0.0216	0.2165		225712	rs11161510	T	0.2981	0.2889	-0.0216
226111	6	111381468	111488161		0.0276	0.0276	0.0276	0.1209	0.1209	0.1209		226111	rs6904275	C	0.3127	0.2833	0.0276	0.1209		226111	rs6904275	C	0.3006	0.3079	0.0276	0.1209		226111	rs6904275	C	0.3232	0.2873	0.0276	0.1209		226111	rs6904275	C	0.3356	0.3263	0.0276	0.1209		226111	rs6904275	C	0.2924	0.2943	0.0276
226538	18	50732891	52637655	CCDC68	-0.0315	-0.016	-0.02216	0.1211	0.4281	0.2917		226538	rs11661650	G	0.1705	0.2029	-0.0238	0.2418		226538	rs8093396	T	0.1924	0.1829	-0.0315	0.1211		226538	rs11665320	A	0.1822	0.1893	-0.016	0.4281		226538	rs11665320	A	0.1575	0.2018	-0.016	0.4281		226538	rs11664828	C	0.1588	0.1828	-0.0235
226685	14	77085650	78015897	SPTLC2	0.0259	0.0259	0.0259	0.18	0.18	0.18		226685	rs2284230	T	0.2361	0.2131	0.0259	0.18		226685	rs2284230	T	0.2051	0.2165	0.0259	0.18		226685	rs2284230	T	0.2193	0.2139	0.0259	0.18		226685	rs2284230	T	0.1575	0.1657	0.0259	0.18		226685	rs2284230	T	0.2144	0.1844	0.0259
227086	2	1721050	1742701	PXDN	-0.0232	-0.013	-0.01672	0.1996	0.4676	0.35504		227086	rs4853841	G	0.2723	0.2578	-0.0172	0.3202		227086	rs4853843	G	0.2402	0.2439	-0.013	0.4676		227086	rs4853841	G	0.2424	0.2745	-0.0172	0.3202		227086	rs4853843	G	0.1507	0.2425	-0.013	0.4676		227086	rs10204174	C	0.26	0.2738	-0.0232
227624	4	58150202	58515319	ENSG00000250333	0.021	0.0251	0.02264	0.2714	0.3573	0.32372		227624	rs1425316	T	0.1589	0.1336	0.021	0.3573		227624	rs6840178	C	0.1461	0.1006	0.0251	0.2714		227624	rs11939342	T	0.1399	0.1376	0.0251	0.2753		227624	rs1425316	T	0.1233	0.1807	0.021	0.3573		227624	rs1425316	T	0.1358	0.1349	0.021
227820	5	178468319	178513141		0.0174	0.0194	0.0182	0.2387	0.3081	0.27782		227820	rs1136377	C	0.3161	0.321	0.0184	0.2671		227820	rs1136377	C	0.3511	0.2805	0.0184	0.2671		227820	rs11750568	A	0.3509	0.3194	0.0194	0.2387		227820	rs1445846	T	0.3082	0.3623	0.0174	0.3081		227820	rs1445846	T	0.3397	0.3267	0.0174
227891	13	81954698	83017730		0.0162	0.0262	0.01898	0.1219	0.3405	0.26786		227891	rs1335842	C	0.3321	0.2993	0.0175	0.2923		227891	rs2026167	T	0.309	0.3354	0.0262	0.1219		227891	rs1335843	T	0.3556	0.3218	0.0162	0.3405		227891	rs1335842	C	0.2534	0.2801	0.0175	0.2923		227891	rs1335842	C	0.3051	0.3264	0.0175
227922	20	38947279	39513865		0.0113	0.0113	0.0113	0.4637	0.4637	0.4637		227922	rs4142346	A	0.4812	0.4989	0.0113	0.4637		227922	rs4142346	A	0.4831	0.4726	0.0113	0.4637		227922	rs4142346	A	0.4723	0.4818	0.0113	0.4637		227922	rs4142346	A	0.5	0.4671	0.0113	0.4637		227922	rs4142346	A	0.4995	0.5	0.0113
228489	7	47349043	47382518	TNS3	0.0238	0.0238	0.0238	0.1223	0.1223	0.1223		228489	rs12375125	A	0.4508	0.4111	0.0238	0.1223		228489	rs12375125	A	0.4452	0.4268	0.0238	0.1223		228489	rs12375125	A	0.4189	0.4224	0.0238	0.1223		228489	rs12375125	A	0.4041	0.4641	0.0238	0.1223		228489	rs12375125	A	0.4353	0.3918	0.0238
228623	4	38888405	39286949	WDR19	0.0163	0.0208	0.01934	0.2102	0.343	0.25302		228623	rs11730558	A	0.3375	0.3171	0.0208	0.2102		228623	rs2167494	T	0.3048	0.3384	0.0194	0.2608		228623	rs2381349	A	0.3122	0.2917	0.0194	0.2409		228623	rs11730558	A	0.3904	0.3758	0.0208	0.2102		228623	rs11096990	T	0.3207	0.2934	0.0163
228741	16	6285925	6340645	RBFOX1	-0.0196	-0.0192	-0.01952	0.2523	0.256	0.25304		228741	rs10852675	C	0.3268	0.3531	-0.0196	0.2523		228741	rs10852675	C	0.323	0.3262	-0.0196	0.2523		228741	rs4786850	C	0.2799	0.3345	-0.0192	0.256		228741	rs10852675	C	0.3425	0.3293	-0.0196	0.2523		228741	rs10852675	C	0.3289	0.3539	-0.0196
229124	16	86306049	87769951	KLHDC4	0.0236	0.0268	0.02488	0.2248	0.2644	0.24856		229124	rs1984980	G	0.1762	0.1596	0.0236	0.2644		229124	rs1984980	G	0.132	0.1494	0.0236	0.2644		229124	rs12933937	T	0.1515	0.1448	0.0268	0.2248		229124	rs12933937	T	0.1528	0.1451	0.0268	0.2248		229124	rs1984980	G	0.1683	0.1942	0.0236
229243	12	5573729	5747963	ANO2	-0.022	-0.0149	-0.02058	0.18	0.3877	0.22154		229243	rs10774348	G	0.3554	0.3775	-0.022	0.18		229243	rs11609654	T	0.427	0.3415	-0.0149	0.3877		229243	rs10774348	G	0.3571	0.3735	-0.022	0.18		229243	rs10774348	G	0.3904	0.3413	-0.022	0.18		229243	rs10774348	G	0.373	0.3953	-0.022
229263	13	101410044	102612273	FGF14	-0.0198	-0.0106	-0.01282	0.3414	0.5809	0.51882		229263	rs12877811	C	0.1982	0.2206	-0.0106	0.5809		229263	rs12877811	C	0.2022	0.1768	-0.0106	0.5809		229263	rs7989226	C	0.1658	0.1776	-0.0198	0.3414		229263	rs12877811	C	0.2055	0.1976	-0.0106	0.5809		229263	rs11839966	C	0.1984	0.2217	-0.0125
230085	7	4612776	4647262		0.0039	0.0147	0.00752	0.3673	0.8071	0.65394		230085	rs12701792	T	0.442	0.4102	0.0147	0.3673		230085	rs2343561	G	0.4733	0.4573	0.0112	0.4811		230085	rs12112079	T	0.4679	0.4661	0.0039	0.8071		230085	rs12112079	T	0.4041	0.4758	0.0039	0.8071		230085	rs12112079	T	0.4914	0.4577	0.0039
230325	18	22689585	24445847	AQP4-AS1	0.0276	0.0321	0.02958	0.1233	0.1667	0.14524		230325	rs12604514	C	0.2027	0.1841	0.0276	0.1667		230325	rs12604514	C	0.1563	0.2012	0.0276	0.1667		230325	rs335929	C	0.2148	0.1776	0.0285	0.1462		230325	rs162007	A	0.1507	0.2036	0.0321	0.1233		230325	rs162007	A	0.1959	0.1985	0.0321
230349	1	67981534	68208946		-0.0325	-0.0213	-0.0277	0.1235	0.3314	0.21322		230349	rs344931	T	0.15	0.1375	-0.032	0.1431		230349	rs557986	T	0.1194	0.1707	-0.0213	0.3314		230349	rs557986	T	0.1684	0.1552	-0.0213	0.3314		230349	rs488778	T	0.1781	0.1446	-0.0314	0.1367		230349	rs344933	C	0.1554	0.1471	-0.0325
230377	4	79133255	79355056	FRAS1	0.0255	0.0261	0.02598	0.1234	0.1341	0.12554		230377	rs2866993	C	0.3514	0.3225	0.0261	0.1234		230377	rs2866993	C	0.3315	0.3384	0.0261	0.1234		230377	rs2866993	C	0.3182	0.3198	0.0261	0.1234		230377	rs2866993	C	0.4041	0.2994	0.0261	0.1234		230377	rs11098091	C	0.3437	0.305	0.0255
230431	9	16175621	16185621		0.0257	0.0346	0.02748	0.1494	0.2542	0.23324		230431	rs10113994	A	0.1241	0.1186	0.0257	0.2542		230431	rs7029038	T	0.1419	0.1019	0.0346	0.1494		230431	rs10113994	A	0.1275	0.1442	0.0257	0.2542		230431	rs10113994	A	0.1301	0.1198	0.0257	0.2542		230431	rs10113994	A	0.1475	0.1211	0.0257
230757	10	63032551	63366958		-0.0229	-0.0219	-0.0221	0.1513	0.1848	0.1781		230757	rs2814020	T	0.3679	0.3858	-0.0219	0.1848		230757	rs2814020	T	0.3904	0.3476	-0.0219	0.1848		230757	rs2814020	T	0.3627	0.4046	-0.0219	0.1848		230757	rs2814020	T	0.4583	0.3909	-0.0219	0.1848		230757	rs2251363	C	0.3623	0.3946	-0.0229
230850	3	111815278	113297968	C3orf52,GCSAM	-0.055	-0.035	-0.04402	0.2129	0.4074	0.3042		230850	rs1492488	C	0.0375	0.04878	-0.055	0.2129		230850	rs340157	G	0.02388	0.02744	-0.0421	0.3103		230850	rs340157	G	0.02952	0.04788	-0.0421	0.3103		230850	rs7649379	C	0.0411	0.03593	-0.0459	0.2801		230850	rs16859188	T	0.02471	0.03041	-0.035
230894	8	135122889	135212703		-0.0226	-0.0186	-0.02012	0.1492	0.2457	0.20666		230894	rs1124525	G	0.4554	0.4822	-0.0226	0.1492		230894	rs4897681	C	0.4607	0.4665	-0.0204	0.2014		230894	rs4897681	C	0.4866	0.4829	-0.0204	0.2014		230894	rs1840936	G	0.4932	0.4669	-0.0186	0.2457		230894	rs1446995	G	0.4842	0.4541	-0.0186
231447	15	43913061	46125769	ENSG00000259200	-0.0257	-0.0257	-0.0257	0.124	0.124	0.124		231447	rs2460641	C	0.3061	0.327	-0.0257	0.124		231447	rs2460641	C	0.2711	0.3282	-0.0257	0.124		231447	rs2460641	C	0.2857	0.3042	-0.0257	0.124		231447	rs2460641	C	0.3082	0.2754	-0.0257	0.124		231447	rs2460641	C	0.2908	0.3014	-0.0257
231463	18	69267213	71103611		-0.0322	-0.026	-0.02724	0.1558	0.2539	0.23428		231463	rs17819948	C	0.1223	0.1467	-0.026	0.2539		231463	rs17819948	C	0.1264	0.1677	-0.026	0.2539		231463	rs7242045	C	0.1239	0.157	-0.0322	0.1558		231463	rs17819948	C	0.1438	0.1114	-0.026	0.2539		231463	rs17819948	C	0.1446	0.1329	-0.026
231753	12	93848520	95324389	NDUFA12	0.0297	0.0297	0.0297	0.1242	0.1242	0.1242		231753	rs249153	C	0.2179	0.2073	0.0297	0.1242		231753	rs249153	C	0.2051	0.1921	0.0297	0.1242		231753	rs249153	C	0.2362	0.1897	0.0297	0.1242		231753	rs249153	C	0.2671	0.2275	0.0297	0.1242		231753	rs249153	C	0.2164	0.1944	0.0297
232090	11	133010525	133505509		0.0397	0.055	0.04356	0.1418	0.2817	0.2403		232090	rs12418740	A	0.05089	0.0582	0.055	0.1418		232090	rs4937795	T	0.06601	0.04268	0.0409	0.2817		232090	rs4603319	G	0.05793	0.04364	0.0425	0.236		232090	rs2375252	C	0.03425	0.05389	0.0397	0.271		232090	rs2375252	C	0.07053	0.05018	0.0397
232553	12	96205119	97680988		-0.0278	-0.0174	-0.02182	0.2308	0.448	0.35774		232553	rs4559732	C	0.1357	0.1524	-0.0174	0.448		232553	rs7306712	A	0.1152	0.1311	-0.0278	0.2308		232553	rs4559732	C	0.1239	0.1552	-0.0174	0.448		232553	rs7306712	A	0.1301	0.1138	-0.0278	0.2308		232553	rs11108947	C	0.1257	0.1313	-0.0187
232684	10	92016690	92032294		0.0191	0.0283	0.025	0.1581	0.3102	0.19798		232684	rs7069153	T	0.2406	0.2251	0.0257	0.1645		232684	rs943317	A	0.2767	0.2012	0.0283	0.1581		232684	rs4933181	T	0.2656	0.2697	0.0191	0.3102		232684	rs7069153	T	0.2397	0.2605	0.0257	0.1645		232684	rs4933179	T	0.3073	0.2626	0.0262
232854	11	4344336	4399936		0.0136	0.0245	0.02014	0.1249	0.375	0.22494		232854	rs12293167	T	0.4955	0.4529	0.0245	0.1249		232854	rs12293167	T	0.4902	0.4482	0.0245	0.1249		232854	rs12293167	T	0.4866	0.4758	0.0245	0.1249		232854	rs7124081	A	0.4932	0.4341	0.0136	0.375		232854	rs7124081	A	0.4588	0.4677	0.0136
233055	20	15553849	15605849	MACROD2	0.0251	0.0251	0.0251	0.125	0.125	0.125		233055	rs200758	T	0.4098	0.3731	0.0251	0.125		233055	rs200758	T	0.3539	0.3567	0.0251	0.125		233055	rs200758	T	0.3891	0.3994	0.0251	0.125		233055	rs200758	T	0.4722	0.3795	0.0251	0.125		233055	rs200758	T	0.3941	0.36	0.0251
233230	1	210878498	212817909		-0.03	-0.0281	-0.02886	0.1252	0.15	0.14008		233230	rs3923950	T	0.1973	0.2259	-0.0281	0.15		233230	rs3923950	T	0.2205	0.273	-0.0281	0.15		233230	rs3923950	T	0.2148	0.2115	-0.0281	0.15		233230	rs6674102	T	0.226	0.2305	-0.03	0.1252		233230	rs6674102	T	0.2132	0.212	-0.03
233296	6	47824080	47932039		-0.0127	-0.0127	-0.0127	0.4061	0.4061	0.4061		233296	rs2039122	A	0.4643	0.495	-0.0127	0.4061		233296	rs2039122	A	0.4817	0.4726	-0.0127	0.4061		233296	rs2039122	A	0.4697	0.4679	-0.0127	0.4061		233296	rs2039122	A	0.4857	0.4273	-0.0127	0.4061		233296	rs2039122	A	0.4932	0.4776	-0.0127
233874	20	14275758	14318619	MACROD2	0.0365	0.0746	0.06698	0.1255	0.3792	0.17624		233874	rs16994496	C	0.04032	0.04181	0.0746	0.1255		233874	rs16994496	C	0.03792	0.03963	0.0746	0.1255		233874	rs16994499	G	0.05625	0.03762	0.0365	0.3792		233874	rs16994496	C	0.02083	0.02395	0.0746	0.1255		233874	rs16994496	C	0.04113	0.02995	0.0746
234212	17	31454449	34430336		0.0136	0.0136	0.0136	0.3881	0.3881	0.3881		234212	rs10491121	A	0.3882	0.4047	0.0136	0.3881		234212	rs10491121	A	0.3904	0.3902	0.0136	0.3881		234212	rs10491121	A	0.4055	0.4127	0.0136	0.3881		234212	rs10491121	A	0.3973	0.3825	0.0136	0.3881		234212	rs10491121	A	0.4011	0.3685	0.0136
234270	3	2192011	2217011	CNTN4	-0.014	-0.014	-0.014	0.3877	0.3877	0.3877		234270	rs4684337	C	0.4275	0.4102	-0.014	0.3877		234270	rs4684337	C	0.438	0.4939	-0.014	0.3877		234270	rs4684337	C	0.4216	0.4364	-0.014	0.3877		234270	rs4684337	C	0.4315	0.4222	-0.014	0.3877		234270	rs4684337	C	0.431	0.402	-0.014
234543	14	60869673	61764115	PRKCH,TMEM30B	-0.0233	-0.0175	-0.02174	0.1861	0.3069	0.21674		234543	rs1051388	A	0.3135	0.3077	-0.0233	0.1861		234543	rs1954011	T	0.2598	0.3221	-0.0213	0.2185		234543	rs3783814	C	0.303	0.3279	-0.0175	0.3069		234543	rs1051388	A	0.2534	0.2545	-0.0233	0.1861		234543	rs1051388	A	0.2894	0.3481	-0.0233
234697	11	87211599	87564240		0.0213	0.0337	0.03018	0.126	0.3496	0.17936		234697	rs2514130	T	0.183	0.153	0.0285	0.1692		234697	rs2514133	G	0.1573	0.09756	0.0213	0.3496		234697	rs17150870	T	0.1393	0.1517	0.0337	0.126		234697	rs17150870	T	0.09589	0.1566	0.0337	0.126		234697	rs17150870	T	0.1623	0.1315	0.0337
234702	12	107461372	108964102	SART3,FICD	0.0401	0.0465	0.04366	0.126	0.1711	0.14312		234702	rs17040655	C	0.07232	0.07539	0.0465	0.126		234702	rs741543	T	0.06901	0.08537	0.0401	0.1711		234702	rs2287552	T	0.082	0.05515	0.0439	0.1395		234702	rs2287552	T	0.1027	0.07186	0.0439	0.1395		234702	rs2287552	T	0.08149	0.0653	0.0439
234738	18	27292121	29029474		0.0147	0.0261	0.02066	0.126	0.4057	0.258		234738	rs2035043	A	0.25	0.2794	0.0147	0.4057		234738	rs724482	G	0.2514	0.2713	0.0161	0.3587		234738	rs1941184	C	0.3259	0.2952	0.0261	0.126		234738	rs7240892	C	0.2397	0.262	0.0232	0.1998		234738	rs7240892	C	0.2769	0.2477	0.0232
234834	8	134822433	134886680	ENSG00000253561	0.0208	0.0221	0.02184	0.1613	0.1801	0.16506		234834	rs11786842	T	0.4964	0.4656	0.0221	0.1613		234834	rs11786842	T	0.4593	0.4451	0.0221	0.1613		234834	rs7357565	A	0.4804	0.4964	0.0208	0.1801		234834	rs11786842	T	0.4315	0.4639	0.0221	0.1613		234834	rs11786842	T	0.4504	0.4646	0.0221
234862	11	109127364	109637777	LINC02715	-0.0286	-0.0084	-0.02106	0.1261	0.6344	0.31138		234862	rs2253536	C	0.2054	0.2156	-0.0286	0.1261		234862	rs2253536	C	0.2219	0.2378	-0.0286	0.1261		234862	rs2099378	C	0.2175	0.2491	-0.0111	0.5442		234862	rs2253536	C	0.2466	0.2545	-0.0286	0.1261		234862	rs1685396	C	0.2486	0.282	-0.0084
235161	9	20420468	20430468	MLLT3	0.0476	0.0476	0.0476	0.1263	0.1263	0.1263		235161	rs6475430	C	0.0805	0.06818	0.0476	0.1263		235161	rs6475430	C	0.06039	0.07622	0.0476	0.1263		235161	rs6475430	C	0.08021	0.07273	0.0476	0.1263		235161	rs6475430	C	0.05556	0.08434	0.0476	0.1263		235161	rs6475430	C	0.08079	0.06648	0.0476
235676	10	80172120	80502114		0.0157	0.0157	0.0157	0.3495	0.3495	0.3495		235676	rs10509401	C	0.3482	0.3309	0.0157	0.3495		235676	rs10509401	C	0.3357	0.372	0.0157	0.3495		235676	rs10509401	C	0.3654	0.3255	0.0157	0.3495		235676	rs10509401	C	0.3562	0.3114	0.0157	0.3495		235676	rs10509401	C	0.3547	0.3122	0.0157
235948	9	16300620	16314909	C9orf92	-0.0214	-0.0161	-0.01928	0.2017	0.347	0.25982		235948	rs7867771	C	0.2688	0.2966	-0.0161	0.347		235948	rs7867771	C	0.2402	0.3018	-0.0161	0.347		235948	rs7851138	G	0.2995	0.3103	-0.0214	0.2017		235948	rs7851138	G	0.3082	0.2904	-0.0214	0.2017		235948	rs7851138	G	0.3026	0.2961	-0.0214
236026	1	164127437	165860813	UCK2,ENSG00000236364	0.0229	0.0229	0.0229	0.1426	0.1426	0.1426		236026	rs3762365	A	0.417	0.3969	0.0229	0.1426		236026	rs3762365	A	0.4438	0.3841	0.0229	0.1426		236026	rs3762365	A	0.4456	0.4279	0.0229	0.1426		236026	rs3762365	A	0.411	0.3952	0.0229	0.1426		236026	rs3762365	A	0.4238	0.4507	0.0229
236062	4	158051385	158270835	GLRB	-0.0311	-0.0311	-0.0311	0.1269	0.1269	0.1269		236062	rs7655209	A	0.1637	0.1813	-0.0311	0.1269		236062	rs7655209	A	0.1573	0.2043	-0.0311	0.1269		236062	rs7655209	A	0.1589	0.157	-0.0311	0.1269		236062	rs7655209	A	0.1806	0.179	-0.0311	0.1269		236062	rs7655209	A	0.1704	0.1858	-0.0311
236408	3	161895538	163396466		-0.0259	-0.0222	-0.02442	0.1297	0.181	0.15022		236408	rs13095680	C	0.3183	0.3164	-0.0259	0.1297		236408	rs13095680	C	0.309	0.2988	-0.0259	0.1297		236408	rs13095680	C	0.2799	0.3121	-0.0259	0.1297		236408	rs16850784	A	0.3356	0.3313	-0.0222	0.181		236408	rs16850784	A	0.2932	0.3219	-0.0222
236546	1	163883944	165617320	MGST3	-0.024	-0.0177	-0.02022	0.1379	0.2757	0.22058		236546	rs1878076	G	0.35	0.3664	-0.024	0.1379		236546	rs9333413	A	0.3315	0.3537	-0.0177	0.2757		236546	rs1878076	G	0.3485	0.3691	-0.024	0.1379		236546	rs9333413	A	0.3425	0.3892	-0.0177	0.2757		236546	rs9333413	A	0.3444	0.3122	-0.0177
236636	9	91242078	92052258	SEMA4D	0.0281	0.0281	0.0281	0.1272	0.1272	0.1272		236636	rs4073713	A	0.2429	0.214	0.0281	0.1272		236636	rs4073713	A	0.2093	0.25	0.0281	0.1272		236636	rs4073713	A	0.2353	0.1958	0.0281	0.1272		236636	rs4073713	A	0.2123	0.2006	0.0281	0.1272		236636	rs4073713	A	0.2237	0.212	0.0281
236978	12	57139509	58862091		-0.0298	-0.0254	-0.02628	0.1274	0.2094	0.193		236978	rs2355002	A	0.192	0.209	-0.0254	0.2094		236978	rs2355002	A	0.2093	0.2073	-0.0254	0.2094		236978	rs3900145	A	0.1622	0.2012	-0.0298	0.1274		236978	rs2355002	A	0.2143	0.1727	-0.0254	0.2094		236978	rs2355002	A	0.2015	0.2122	-0.0254
237159	17	48243948	50908543		-0.0319	-0.0117	-0.02132	0.1356	0.6051	0.37836		237159	rs8080294	A	0.1536	0.1521	-0.0319	0.1356		237159	rs8080294	A	0.1334	0.1433	-0.0319	0.1356		237159	rs10515029	A	0.1417	0.1176	-0.0117	0.6051		237159	rs10515029	A	0.1781	0.1497	-0.0117	0.6051		237159	rs10515026	T	0.116	0.1623	-0.0194
237237	5	150338636	150381243		0.0205	0.0245	0.0214	0.1276	0.2031	0.18576		237237	rs17111637	A	0.3607	0.3481	0.0245	0.1276		237237	rs977696	A	0.4059	0.3445	0.021	0.1919		237237	rs1351131	A	0.3663	0.3545	0.0205	0.2031		237237	rs1351131	A	0.3082	0.3593	0.0205	0.2031		237237	rs1351131	A	0.3772	0.3495	0.0205
237251	7	134611180	134947623	SLC23A4P	-0.0173	-0.0135	-0.01654	0.2815	0.4018	0.30556		237251	rs1019621	T	0.4179	0.4363	-0.0173	0.2815		237251	rs1019621	T	0.4537	0.4848	-0.0173	0.2815		237251	rs17168349	T	0.4046	0.4411	-0.0135	0.4018		237251	rs1019621	T	0.4452	0.3922	-0.0173	0.2815		237251	rs1019621	T	0.4509	0.4632	-0.0173
237611	10	131231511	131338714	MGMT	-0.0235	-0.0166	-0.01912	0.1278	0.2984	0.22306		237611	rs7087541	C	0.4714	0.4922	-0.0235	0.1278		237611	rs7909964	C	0.4438	0.4665	-0.0166	0.2984		237611	rs10764889	A	0.433	0.4727	-0.0191	0.2178		237611	rs871026	A	0.411	0.491	-0.0182	0.2352		237611	rs1771448	A	0.4905	0.4937	-0.0182
237677	1	48179047	48406460	TRABD2B	-0.0207	-0.0182	-0.01954	0.2168	0.2656	0.23574		237677	rs11211632	A	0.3741	0.3952	-0.0196	0.2321		237677	rs2088361	C	0.3399	0.4024	-0.0207	0.2168		237677	rs11211632	A	0.4071	0.4061	-0.0196	0.2321		237677	rs11211632	A	0.4452	0.4251	-0.0196	0.2321		237677	rs11211631	A	0.3975	0.4204	-0.0182
[truncated: 971 more rows]
[truncated: 1 more columns]

## Sheet: 4. 149 Model SNP Info
Supplemental 4:
[truncated: 151 more rows]
[truncated: 2 more columns]

## Sheet: 5. Summary Table
Supplemental 5:
[truncated: 13 more rows]
